# Supplementary material
Source: Frontiers journal article supplement (https://www.frontiersin.org/articles/436812)
Supplement: Table_1.xlsx [file Table_1.xlsx]

## Sheet: PB2
Table S1. GISAID acknowledgements for PB2 segment.
Isolate ID	Segment	Country	Collection date	Isolate name	Originating Laboratory	Submitting Laboratory	Authors
EPI89468	PB2	China	1979	A/duck/Hong-Kong/784/1979		Other Database Import
EPI590166	PB2	Hong-Kong-(SAR)	1980	A/duck/Hong-Kong/819/1980		Other Database Import	Kida,H.; Sakoda,Y.; Okamatsu,M.; Matsuno,K.; Masani,K.; Hatamachi,J.
EPI590284	PB2	Hong-Kong-(SAR)	1980	A/duck/Hong-Kong/820/1980		Other Database Import	Kida,H.; Sakoda,Y.; Okamatsu,M.; Matsuno,K.; Masani,K.; Hatamachi,J.
EPI5779	PB2	China	1996	A/Goose/Guangdong/1/96		Other Database Import
EPI317	PB2	Japan	1997	A/parakeet/Chiba/1/97		Other Database Import
EPI82128	PB2	China	1999	A/chicken/Guangxi/9/99		Other Database Import
EPI82122	PB2	China	2001	A/chicken/Guangdong/56/01		Other Database Import
EPI1474	PB2	Japan	2001	A/chicken/Osaka/aq58/2001		Other Database Import
EPI236555	PB2	Hong-Kong-(SAR)	2001	A/Duck/Hong-Kong/380.5/2001		Other Database Import	Kim,L.M.; Scott,M.A.; Suarez,D.L.; Spackman,E.; Swayne,D.E.; Afonso,C.L.
EPI269285	PB2	China	2001	A/duck/Shantou/1197/2001		Other Database Import	Huang,K.; Bahl,J.; Fan,X.; Vijaykrishna,D.; Cheung,C.; Webby,R.J.; Webster,R.G.; Chen,H.; Smith,G.J.D.; Peiris,M.J.S.; Guan,Y.
EPI235804	PB2	China	2002	A/chicken/Jilin/hd/2002		Other Database Import	Liao,X.; Zhang,X.; Wang,J.; Yu,J.; Jin,N.
EPI102569	PB2	Taiwan	2002	A/chicken/Taiwan/0222/02		Other Database Import
EPI102585	PB2	Taiwan	2002	A/chicken/Taiwan/0408/02		Other Database Import
EPI102571	PB2	Taiwan	2002	A/chicken/Taiwan/PF1/02		Other Database Import
EPI102575	PB2	Taiwan	2002	A/chicken/Taiwan/PF3/02		Other Database Import
EPI1528	PB2	Japan	2002	A/chicken/Yokohama/aq134/2002		Other Database Import
EPI269237	PB2	China	2002	A/duck/Shantou/1706/2002		Other Database Import	Huang,K.; Bahl,J.; Fan,X.; Vijaykrishna,D.; Cheung,C.; Webby,R.J.; Webster,R.G.; Chen,H.; Smith,G.J.D.; Peiris,M.J.S.; Guan,Y.
EPI269235	PB2	China	2002	A/duck/Shantou/2061/2002		Other Database Import	Huang,K.; Bahl,J.; Fan,X.; Vijaykrishna,D.; Cheung,C.; Webby,R.J.; Webster,R.G.; Chen,H.; Smith,G.J.D.; Peiris,M.J.S.; Guan,Y.
EPI375633	PB2	China	2003-Apr-01	A/duck/Fujian/MH/2003		Other Database Import	Fu,G.; Huang,Y.
EPI184118	PB2	Pakistan	2003	A/chicken/Karachi/NARC-23/2003		Other Database Import	Abbas,M.A.; Spackman,E.; Ahmed,Z.; Naeem,K.; Siddique,N.; Swayne,D.; Sarmento,L.; Hameed,A.
EPI25020	PB2	China	2004	A/chicken/Guangdong/178/04		Other Database Import
EPI25005	PB2	China	2004	A/chicken/Guangdong/191/04		Other Database Import
EPI167077	PB2	Thailand	2004	A/chicken/Kohn-Kaen/NIAH330/2004		Other Database Import
EPI171052	PB2	Vietnam	2004	A/chicken/Vietnam/933/2004		Other Database Import
EPI269317	PB2	China	2004	A/duck/Hunan/3748/2004		Other Database Import	Huang,K.; Bahl,J.; Fan,X.; Vijaykrishna,D.; Cheung,C.; Webby,R.J.; Webster,R.G.; Chen,H.; Smith,G.J.D.; Peiris,M.J.S.; Guan,Y.
EPI107173	PB2	Thailand	2004	A/open-billed-stork/Nakhonsawan/BBD0104F/2004		Other Database Import
EPI170713	PB2	Vietnam	2005-Dec-06	A/duck/Vietnam/203/2005		Other Database Import
EPI170629	PB2	Vietnam	2005-Dec-16	A/duck/Vietnam/215/2005		Other Database Import
EPI170622	PB2	Vietnam	2005-Dec-18	A/chicken/Vietnam/216/2005		Other Database Import
EPI153589	PB2	Israel	2005	A/chicken/Israel/793/2005		Other Database Import
EPI227017	PB2	Vietnam	2005	A/chicken/Ninh-Binh/209/2005		Other Database Import	Kim,L.M.; Scott,M.A.; Suarez,D.L.; Spackman,E.; Swayne,D.E.; Afonso,C.L.
EPI275867	PB2	China	2005	A/chicken/Sichuan/81/2005		Other Database Import	Li,Y.; Shi,J.; Zhong,G.; Deng,G.; Tian,G.; Ge,J.; Zeng,X.; Song,J.; Zhao,D.; Liu,L.; Jiang,Y.; Guan,Y.; Bu,Z.; Chen,H.
EPI47331	PB2	Vietnam	2005	A/chicken/Viet-Nam/10/2005		Other Database Import
EPI47350	PB2	Vietnam	2005	A/chicken/Viet-Nam/11/2005		Other Database Import
EPI47312	PB2	Vietnam	2005	A/chicken/Viet-Nam/9/2005		Other Database Import
EPI269173	PB2	China	2005	A/duck/Fujian/629/2005		Other Database Import	Huang,K.; Bahl,J.; Fan,X.; Vijaykrishna,D.; Cheung,C.; Webby,R.J.; Webster,R.G.; Chen,H.; Smith,G.J.D.; Peiris,M.J.S.; Guan,Y.
EPI269181	PB2	China	2005	A/duck/Guangxi/141/2005		Other Database Import	Huang,K.; Bahl,J.; Fan,X.; Vijaykrishna,D.; Cheung,C.; Webby,R.J.; Webster,R.G.; Chen,H.; Smith,G.J.D.; Peiris,M.J.S.; Guan,Y.
EPI269198	PB2	China	2005	A/duck/Shantou/2472/2005		Other Database Import	Huang,K.; Bahl,J.; Fan,X.; Vijaykrishna,D.; Cheung,C.; Webby,R.J.; Webster,R.G.; Chen,H.; Smith,G.J.D.; Peiris,M.J.S.; Guan,Y.
EPI110732	PB2	Thailand	2005	A/open-billed-stork/Nakhonsawan/BBD2416F/05		Other Database Import
EPI167088	PB2	Thailand	2005	A/pigeon/Thailand/VSMU-13-KRI/2005		Other Database Import
EPI363516	PB2	China	2006-Feb-01	A/duck/Guizhou/1084/2006		Other Database Import	Huang,K.; Zhu,H.; Fan,X.; Wang,J.; Cheung,C.L.; Duan,L.; Hong,W.; Liu,Y.; Li,L.; Smith,D.K.; Chen,H.; Webster,R.G.; Webby,R.J.; Peiris,M.; Guan,Y.; Cheung,C. L.
EPI122619	PB2	China	2006	A/bird/Guangxi/H1/2006		Other Database Import
EPI47141	PB2	Afghanistan	2006	A/chicken/Afghanistan/1207/2006		Other Database Import
EPI58579	PB2	Afghanistan	2006	A/chicken/Afghanistan/1573-47/2006		Other Database Import
EPI58598	PB2	Afghanistan	2006	A/chicken/Afghanistan/1573-65/2006		Other Database Import
EPI60327	PB2	Afghanistan	2006	A/chicken/Afghanistan/1573-7/2006		Other Database Import
EPI275827	PB2	China	2006	A/chicken/Ningxia/24/2006		Other Database Import	Li,Y.; Shi,J.; Zhong,G.; Deng,G.; Tian,G.; Ge,J.; Zeng,X.; Song,J.; Zhao,D.; Liu,L.; Jiang,Y.; Guan,Y.; Bu,Z.; Chen,H.
EPI408085	PB2	Myanmar	2006	A/chicken/Pyigyitagon/204/2006		Other Database Import	Saito,T.; Watanabe,C.; Hayashi,T.; Uchida,Y.; Myint,W.W.; Thein,W.Z.; Takemae,N.; Mase,M.; Okamatsu,M.; Mar,A.; Mon,C.C.; Gawng,L.T.; Sann,K.; Kyi,T.A.; Yamaguchi,S.
EPI368255	PB2	Thailand	2006	A/duck/Thailand/TS01/2006		Other Database Import	Songserm,T.; Wiboon ut,S.; Kanchongkittiphon,W.; Na Ek,P.; Thitithanyanont,A.
EPI276075	PB2	China	2006	A/wild-duck/Liaoning/8/2006		Other Database Import	Li,Y.; Shi,J.; Zhong,G.; Deng,G.; Tian,G.; Ge,J.; Zeng,X.; Song,J.; Zhao,D.; Liu,L.; Jiang,Y.; Guan,Y.; Bu,Z.; Chen,H.
EPI363636	PB2	China	2006-Jul-01	A/duck/Shantou/14167/2006		Other Database Import	Huang,K.; Zhu,H.; Fan,X.; Wang,J.; Cheung,C.L.; Duan,L.; Hong,W.; Liu,Y.; Li,L.; Smith,D.K.; Chen,H.; Webster,R.G.; Webby,R.J.; Peiris,M.; Guan,Y.; Cheung,C. L.
EPI363452	PB2	China	2006-Mar-01	A/duck/Guangxi/1074/2006		Other Database Import	Huang,K.; Zhu,H.; Fan,X.; Wang,J.; Cheung,C.L.; Duan,L.; Hong,W.; Liu,Y.; Li,L.; Smith,D.K.; Chen,H.; Webster,R.G.; Webby,R.J.; Peiris,M.; Guan,Y.; Cheung,C. L.
EPI177759	PB2	Pakistan	2006-May-02	A/chicken/Pakistan/UDL-01/2006		Other Database Import
EPI365082	PB2	China	2006-Nov-01	A/duck/Fujian/10950/2006		Other Database Import	Huang,K.; Zhu,H.; Fan,X.; Wang,J.; Cheung,C.L.; Duan,L.; Hong,W.; Liu,Y.; Li,L.; Smith,D.K.; Chen,H.; Webster,R.G.; Webby,R.J.; Peiris,M.; Guan,Y.; Cheung,C. L.
EPI363848	PB2	China	2006-Sep-01	A/duck/Fujian/9062/2006		Other Database Import	Huang,K.; Zhu,H.; Fan,X.; Wang,J.; Cheung,C.L.; Duan,L.; Hong,W.; Liu,Y.; Li,L.; Smith,D.K.; Chen,H.; Webster,R.G.; Webby,R.J.; Peiris,M.; Guan,Y.; Cheung,C. L.
EPI365008	PB2	China	2007-Dec-01	A/duck/Fujian/7844/2007		Other Database Import	Huang,K.; Zhu,H.; Fan,X.; Wang,J.; Cheung,C.L.; Duan,L.; Hong,W.; Liu,Y.; Li,L.; Smith,D.K.; Chen,H.; Webster,R.G.; Webby,R.J.; Peiris,M.; Guan,Y.; Cheung,C. L.
EPI365016	PB2	China	2007-Dec-01	A/duck/Fujian/8349/2007		Other Database Import	Huang,K.; Zhu,H.; Fan,X.; Wang,J.; Cheung,C.L.; Duan,L.; Hong,W.; Liu,Y.; Li,L.; Smith,D.K.; Chen,H.; Webster,R.G.; Webby,R.J.; Peiris,M.; Guan,Y.; Cheung,C. L.
EPI181419	PB2	Israel	2007-Dec-02	A/chicken/Israel/951/2007		Other Database Import
EPI181587	PB2	Indonesia	2007	A/chicken/East-Java/UT6044/2007		Other Database Import
EPI164571	PB2	Lao,-People's-Democratic-Republic	2007	A/chicken/Laos/P0171/2007		Other Database Import
EPI285715	PB2	Vietnam	2007	A/duck/Soc-Trang/07-25/2007		Other Database Import	Kim,L.M.; Scott,M.A.; Suarez,D.L.; Spackman,E.; Swayne,D.E.; Afonso,C.L.
EPI622553	PB2	Vietnam	2007	A/duck/Vietnam-Hau-Giang/NCVD-12/2007		Other Database Import	Pantin Jackwood,M.J.; Spackman,E.; Suarez,D.L.; Wasilenko,J.; Sarmento,L.; Shepherd,E.; Smith,D.; Lee,S.; Lone,N.A.
EPI350629	PB2	Vietnam	2007	A/duck/Vietnam/NCVD-102/2007	National Centre of Veterinary Diagnostics	Centers for Disease Control and Prevention	Davis,Todd; Rivailler,Pierre; Nguyen,Tung
EPI350671	PB2	Vietnam	2007	A/duck/Vietnam/NCVD-118/2007	National Centre of Veterinary Diagnostics	Centers for Disease Control and Prevention	Davis,Todd; Rivailler,Pierre; Nguyen,Tung
EPI221608	PB2	Vietnam	2007	A/Muscovy-duck/Ca-Mau/07-04/2007		Other Database Import	Kim,L.M.; Scott,M.A.; Suarez,D.L.; Spackman,E.; Swayne,D.E.; Afonso,C.L.
EPI569539	PB2	China	2007-Jan-11	A/chicken/Jiangsu/01/2007		Other Database Import	Zhao,M.; Gu,X.; Chen,H.; Liu,Q.; Zhong,L.; Huang,J.; Gu,M.; Liu,X.
EPI364032	PB2	China	2007-Jul-01	A/duck/Shantou/1240/2007		Other Database Import	Huang,K.; Zhu,H.; Fan,X.; Wang,J.; Cheung,C.L.; Duan,L.; Hong,W.; Liu,Y.; Li,L.; Smith,D.K.; Chen,H.; Webster,R.G.; Webby,R.J.; Peiris,M.; Guan,Y.; Cheung,C. L.
EPI365110	PB2	China	2007-Jun-01	A/duck/Fujian/1879/2007		Other Database Import	Huang,K.; Zhu,H.; Fan,X.; Wang,J.; Cheung,C.L.; Duan,L.; Hong,W.; Liu,Y.; Li,L.; Smith,D.K.; Chen,H.; Webster,R.G.; Webby,R.J.; Peiris,M.; Guan,Y.; Cheung,C. L.
EPI364981	PB2	China	2007-Nov-01	A/duck/Fujian/6841/2007		Other Database Import	Huang,K.; Zhu,H.; Fan,X.; Wang,J.; Cheung,C.L.; Duan,L.; Hong,W.; Liu,Y.; Li,L.; Smith,D.K.; Chen,H.; Webster,R.G.; Webby,R.J.; Peiris,M.; Guan,Y.; Cheung,C. L.
EPI610323	PB2	China	2007-Nov-20	A/chicken/Guangxi/LF/2007		Other Database Import	Peng,Y.; Xie,Z.; Liu,J.; Pang,Y.; Xie,L.; Luo,S.; Fan,Q.
EPI364935	PB2	China	2007-Sep-01	A/duck/Fujian/4676/2007		Other Database Import	Huang,K.; Zhu,H.; Fan,X.; Wang,J.; Cheung,C.L.; Duan,L.; Hong,W.; Liu,Y.; Li,L.; Smith,D.K.; Chen,H.; Webster,R.G.; Webby,R.J.; Peiris,M.; Guan,Y.; Cheung,C. L.
EPI560119	PB2	China	2008-Apr-01	A/chicken/Anhui/1/2008		Other Database Import	Zhu,Y.
EPI350664	PB2	Vietnam	2008-Dec-01	A/duck/Vietnam/NCVD-140/2008	National Centre of Veterinary Diagnostics	Centers for Disease Control and Prevention	Davis,Todd; Rivailler,Pierre; Nguyen,Tung
EPI350748	PB2	Vietnam	2008-Dec-01	A/duck/Vietnam/NCVD-160/2008	National Centre of Veterinary Diagnostics	Centers for Disease Control and Prevention	Davis,Todd; Rivailler,Pierre; Nguyen,Tung
EPI610278	PB2	China	2008-Dec-12	A/chicken/Guangxi/DX/2008		Other Database Import	Peng,Y.; Xie,Z.; Liu,J.; Pang,Y.; Xie,L.; Luo,S.; Fan,Q.
EPI469109	PB2	China	2008	A/chicken/Hong-Kong/NT155/2008		Other Database Import	Lam,T.T.Y.; Wang,J.; Shen,Y.; Zhou,B.; Duan,L.; Cheung,C.L.; Ma,C.; Lycett,S.J.; Leung,C.Y.H.; Chen,X.; Li,L.; Hong,W.; Chai,Y.; Zhou,L.; Liang,H.; Ou,Z.; Liu,Y.; Farooqui,A.; Kelvin,D.J.; Poon,L.L.M.; Smith,D.K.; Pybus,O.G.; Leung,G.M.; Shu,Y.; Webster,R.G.; Webby,R.J.; Peiris,J.S.M.; Rambaut,A.; Zhu,H.; Guan,Y.
EPI349859	PB2	Vietnam	2008	A/chicken/Vietnam/NCVD-033/2008	National Centre of Veterinary Diagnostics	Centers for Disease Control and Prevention	Davis,Todd; Rivailler,Pierre; Nguyen,Tung
EPI350517	PB2	Vietnam	2008	A/duck/Vietnam/NCVD-009/2008	National Centre of Veterinary Diagnostics	Centers for Disease Control and Prevention	Davis,Todd; Rivailler,Pierre; Nguyen,Tung
EPI177791	PB2	Pakistan	2008-Jan-09	A/chicken/Pakistan/UDL-01/2008		Other Database Import
EPI349845	PB2	Vietnam	2008-May-01	A/chicken/Vietnam/NCVD-03/2008	National Centre of Veterinary Diagnostics	Centers for Disease Control and Prevention	Davis,Todd; Rivailler,Pierre; Nguyen,Tung
EPI299289	PB2	Japan	2008-Oct-08	A/avian/Japan/8KI0135/2008		Other Database Import	The NIAID Influenza Genome Sequencing Consortium
EPI1007373	PB2	China	2008-Oct-09	A/duck/Hubei/S4170/2008		Other Database Import	Wang,G.; Deng,G.; Shi,J.; Luo,W.; Zhang,G.; Zhang,Q.; Liu,L.; Jiang,Y.; Li,C.; Sriwilaijaroen,N.; Hiramatsu,H.; Suzuki,Y.; Kawaoka,Y.; Chen,H.
EPI540308	PB2	Bangladesh	2009-Dec-23	A/duck/Bangladesh/1574/2009	Institute of Epidemiology Disease Control and Research (IEDCR) & Bangladesh National Influenza Centre (NIC)	Centers for Disease Control and Prevention	Gerloff, Nancy; Simpson, Natosha; Davis, C. Todd
EPI350155	PB2	Vietnam	2009	A/chicken/Vietnam/NCVD-390/2009	National Centre of Veterinary Diagnostics	Centers for Disease Control and Prevention	Davis,Todd; Rivailler,Pierre; Nguyen,Tung
EPI469213	PB2	China	2009	A/duck/Jiangxi/8032/2009		Other Database Import	Lam,T.T.Y.; Wang,J.; Shen,Y.; Zhou,B.; Duan,L.; Cheung,C.L.; Ma,C.; Lycett,S.J.; Leung,C.Y.H.; Chen,X.; Li,L.; Hong,W.; Chai,Y.; Zhou,L.; Liang,H.; Ou,Z.; Liu,Y.; Farooqui,A.; Kelvin,D.J.; Poon,L.L.M.; Smith,D.K.; Pybus,O.G.; Leung,G.M.; Shu,Y.; Webster,R.G.; Webby,R.J.; Peiris,J.S.M.; Rambaut,A.; Zhu,H.; Guan,Y.
EPI350811	PB2	Vietnam	2009	A/duck/Vietnam/NCVD-364/2009	National Centre of Veterinary Diagnostics	Centers for Disease Control and Prevention	Davis,Todd; Rivailler,Pierre; Nguyen,Tung
EPI350818	PB2	Vietnam	2009	A/duck/Vietnam/NCVD-365/2009	National Centre of Veterinary Diagnostics	Centers for Disease Control and Prevention	Davis,Todd; Rivailler,Pierre; Nguyen,Tung
EPI350860	PB2	Vietnam	2009	A/duck/Vietnam/NCVD-368/2009	National Centre of Veterinary Diagnostics	Centers for Disease Control and Prevention	Davis,Todd; Rivailler,Pierre; Nguyen,Tung
EPI350874	PB2	Vietnam	2009	A/duck/Vietnam/NCVD-376/2009	National Centre of Veterinary Diagnostics	Centers for Disease Control and Prevention	Davis,Todd; Rivailler,Pierre; Nguyen,Tung
EPI351533	PB2	Vietnam	2009	A/muscovy-duck/Vietnam/NCVD-384/2009	National Centre of Veterinary Diagnostics	Centers for Disease Control and Prevention	Davis,Todd; Rivailler,Pierre; Nguyen,Tung
EPI345528	PB2	China	2009-Jun-01	A/duck/Eastern-China/10/2009		Other Database Import	Zhao,G.; Liu,X.
EPI500971	PB2	China	2009-Mar-05	A/Duck/Guangdong/S1663/2009	Harbin Veterinary Research Institute (CAAS)	Harbin Veterinary Research Institute (CAAS)	Wang, G.J.; Deng,G.H.; Shi, J.Z.; Luo, W.Y.; Zhang, G.Q.; Zhang, Q.Y.; Liu, L.L.; Jiang, Y.P.; Li, C.J.; Sriwilaijaroen, N.; Hiramatsu, H.; Suzuki, Y.; Kawaoka, Y.; Chen, H.L.
EPI471872	PB2	China	2009-Nov-14	A/duck/Guangxi/GXd-4/2009		Other Database Import	Xie,Z.; Zhou,C.; Peng,Y.; Liu,J.; Pang,Y.; Deng,X.; Xie,L.; Fan,Q.
EPI314009	PB2	China	2009-Sep-10	A/duck/Tibet/S2/2009		Other Database Import	Suolang,S.; Jin,M.
EPI350475	PB2	Vietnam	2010-Apr-01	A/chicken/Vietnam/NCVD-412/2010	National Centre of Veterinary Diagnostics	Centers for Disease Control and Prevention	Davis,Todd; Rivailler,Pierre; Nguyen,Tung
EPI1035776	PB2	China	2010-Apr-08	A/duck/Guangxi/058/2010		Other Database Import	Li,M.; Xie,Z.X.; Xie,L.J.; Deng,X.W.; Xie,Q.Z.; Liu,J.B.; Fan,Q.; Pang,Y.S.; Luo,S.S.
EPI618044	PB2	Georgia	2010-Apr-28	A/domestic-duck/Republic-of-Georgia/2/2010		Other Database Import	Wentworth,D.E.; Halpin,R.A.; Lin,X.; Simenauer,A.; Akopov,A.; Mohan,M.; Fedorova,N.; Tsitrin,T.; Puri,V.; Stockwell,T.; Amedeo,P.; Bishop,B.; Gupta,N.; Hoover,J.; Katzel,D.; Schobel,S.; Shrivastava,S.; Thovarai,V.; Bao,Y.; Sanders,R.; Zhdanov,S.; Kiryutin,B.; Lipman,D.J.; Tatusova,T.; Fouchier,R.A.M.
EPI501043	PB2	China	2010-Dec-10	A/Duck/Guangxi/S4111/2010	Harbin Veterinary Research Institute (CAAS)	Harbin Veterinary Research Institute (CAAS)	Wang, G.J.; Deng,G.H.; Shi, J.Z.; Luo, W.Y.; Zhang, G.Q.; Zhang, Q.Y.; Liu, L.L.; Jiang, Y.P.; Li, C.J.; Sriwilaijaroen, N.; Hiramatsu, H.; Suzuki, Y.; Kawaoka, Y.; Chen, H.L.
EPI501099	PB2	China	2010-Dec-10	A/Duck/Hunan/S4273/2010	Harbin Veterinary Research Institute (CAAS)	Harbin Veterinary Research Institute (CAAS)	Wang, G.J.; Deng,G.H.; Shi, J.Z.; Luo, W.Y.; Zhang, G.Q.; Zhang, Q.Y.; Liu, L.L.; Jiang, Y.P.; Li, C.J.; Sriwilaijaroen, N.; Hiramatsu, H.; Suzuki, Y.; Kawaoka, Y.; Chen, H.L.
EPI350169	PB2	Vietnam	2010-Feb-01	A/chicken/Vietnam/NCVD-395/2010	National Centre of Veterinary Diagnostics	Centers for Disease Control and Prevention	Davis,Todd; Rivailler,Pierre; Nguyen,Tung
EPI383180	PB2	China	2010-Feb-10	A/chicken/Jiangsu/k0402/2010		Other Database Import	Hu,J.; Zhao,K.; Liu,X.; Wang,X.; Chen,Z.
EPI469151	PB2	China	2010	A/duck/Fujian/6390/2010		Other Database Import	Lam,T.T.Y.; Wang,J.; Shen,Y.; Zhou,B.; Duan,L.; Cheung,C.L.; Ma,C.; Lycett,S.J.; Leung,C.Y.H.; Chen,X.; Li,L.; Hong,W.; Chai,Y.; Zhou,L.; Liang,H.; Ou,Z.; Liu,Y.; Farooqui,A.; Kelvin,D.J.; Poon,L.L.M.; Smith,D.K.; Pybus,O.G.; Leung,G.M.; Shu,Y.; Webster,R.G.; Webby,R.J.; Peiris,J.S.M.; Rambaut,A.; Zhu,H.; Guan,Y.
EPI448076	PB2	Bangladesh	2010-Jan-04	A/chicken/Bangladesh/1012/2010	Institute of Epidemiology Disease Control and Research (IEDCR) & Bangladesh National Influenza Centre (NIC)	Centers for Disease Control and Prevention	Gerloff, Nancy; Simpson, Natosha; Poh, Mee;Davis, Todd
EPI442006	PB2	China	2010-Jan-27	A/goose/Guangdong/k0103/2010		Other Database Import	Zhao,K.; Gu,M.; Zhong,L.; Duan,Z.; Zhang,Y.; Zhu,Y.; Zhao,G.; Zhao,M.; Chen,Z.; Hu,S.; Liu,W.; Liu,X.; Peng,D.
EPI341425	PB2	Cambodia	2010-Jan-28	A/chicken/Cambodia/TKCMB5T/2010		Other Database Import	Buchy,P.; Mardy,S.; San,S.
EPI503965	PB2	Korea,-Republic-of	2010-Mar-01	A/wild-duck/SH38-64/2010		Other Database Import	Lee,K. J.; Choi,J. G.; Kang,H. M.; Song,B. M.; Lee,E. K.; Lee,H. S.; Lee,Y. J.
EPI500859	PB2	China	2010-Mar-03	A/Chicken/Guangdong/S1312/2010	Harbin Veterinary Research Institute (CAAS)	Harbin Veterinary Research Institute (CAAS)	Wang, G.J.; Deng,G.H.; Shi, J.Z.; Luo, W.Y.; Zhang, G.Q.; Zhang, Q.Y.; Liu, L.L.; Jiang, Y.P.; Li, C.J.; Sriwilaijaroen, N.; Hiramatsu, H.; Suzuki, Y.; Kawaoka, Y.; Chen, H.L.
EPI1007173	PB2	China	2010-Mar-05	A/chicken/Guangdong/S1453/2010		Other Database Import	Wang,G.; Deng,G.; Shi,J.; Luo,W.; Zhang,G.; Zhang,Q.; Liu,L.; Jiang,Y.; Li,C.; Sriwilaijaroen,N.; Hiramatsu,H.; Suzuki,Y.; Kawaoka,Y.; Chen,H.
EPI401607	PB2	China	2010-May-08	A/duck/Guangxi/GXd-5/2010		Other Database Import	Xie,Z.; Xie,L.; Zhou,C.; Liu,J.; Pang,Y.; Deng,X.; Fan,Q.; Peng,Y.
EPI425557	PB2	Vietnam	2010-Nov-01	A/duck/Vietnam/NCVD-645/2010	National Centre of Veterinary Diagnostics	Centers for Disease Control and Prevention
EPI471880	PB2	China	2010-Nov-11	A/duck/Guangxi/GXd-6/2010		Other Database Import	Xie,Z.; Zhou,C.; Peng,Y.; Liu,J.; Pang,Y.; Deng,X.; Xie,L.; Fan,Q.
EPI348864	PB2	Vietnam	2010-Nov-16	A/duck/Vietnam/NCVD-456/2010	National Institute of Hygiene and Epidemiology	Centers for Disease Control and Prevention	Davis,Todd; Rivailler,Pierre; Nguyen,Tung
EPI540356	PB2	Bangladesh	2010-Oct-27	A/duck/Bangladesh/1766/2010	Institute of Epidemiology Disease Control and Research (IEDCR) & Bangladesh National Influenza Centre (NIC)	Centers for Disease Control and Prevention	Gerloff, Nancy; Simpson, Natosha; Davis, C. Todd
EPI424749	PB2	Vietnam	2010-Oct-29	A/duck/Vietnam/NCVD-784/2010	National Centre of Veterinary Diagnostics	Centers for Disease Control and Prevention
EPI540527	PB2	Bangladesh	2011-Apr-03	A/duck/Bangladesh/727/2011	Institute of Epidemiology Disease Control and Research (IEDCR) & Bangladesh National Influenza Centre (NIC)	Centers for Disease Control and Prevention	Gerloff, Nancy; Simpson, Natosha; Davis, C. Todd
EPI424901	PB2	Vietnam	2011-Aug-04	A/duck/Vietnam/NCVD-935/2011	National Centre of Veterinary Diagnostics	Centers for Disease Control and Prevention
EPI387918	PB2	Vietnam	2011-Dec-06	A/muscovy-duck/Vietnam/LBM66/2011		Other Database Import	Soda,K.; Hotta,K.; Nagai,Y.; Ito,T.; Mimura,W.
EPI401489	PB2	Japan	2011-Feb-01	A/chicken/Aichi/2/2011		Other Database Import	Uchida,Y.; Suzuki,Y.; Shirakura,M.; Kawaguchi,A.; Nobusawa,E.; Tanikawa,T.; Hikono,H.; Takemae,N.; Mase,M.; Kanehira,K.; Hayashi,T.; Tagawa,Y.; Tashiro,M.; Saito,T.
EPI401463	PB2	Japan	2011-Feb-01	A/chicken/Miyazaki/9/2011		Other Database Import	Uchida,Y.; Suzuki,Y.; Shirakura,M.; Kawaguchi,A.; Nobusawa,E.; Tanikawa,T.; Hikono,H.; Takemae,N.; Mase,M.; Kanehira,K.; Hayashi,T.; Tagawa,Y.; Tashiro,M.; Saito,T.
EPI401468	PB2	Japan	2011-Feb-01	A/chicken/Wakayama/1/2011		Other Database Import	Uchida,Y.; Suzuki,Y.; Shirakura,M.; Kawaguchi,A.; Nobusawa,E.; Tanikawa,T.; Hikono,H.; Takemae,N.; Mase,M.; Kanehira,K.; Hayashi,T.; Tagawa,Y.; Tashiro,M.; Saito,T.
EPI448164	PB2	Bangladesh	2011-Feb-07	A/crow/Bangladesh/316T/2011	Institute of Epidemiology Disease Control and Research (IEDCR) & Bangladesh National Influenza Centre (NIC)	Centers for Disease Control and Prevention	Gerloff, Nancy; Simpson, Natosha; Poh, Mee;Davis, Todd
EPI618045	PB2	Georgia	2011-Feb-11	A/mallard/Republic-of-Georgia/12/2011		Other Database Import	Wentworth,D.E.; Halpin,R.A.; Lin,X.; Simenauer,A.; Akopov,A.; Mohan,M.; Fedorova,N.; Tsitrin,T.; Puri,V.; Stockwell,T.; Amedeo,P.; Bishop,B.; Gupta,N.; Hoover,J.; Katzel,D.; Schobel,S.; Shrivastava,S.; Thovarai,V.; Bao,Y.; Sanders,R.; Zhdanov,S.; Kiryutin,B.; Lipman,D.J.; Tatusova,T.; Fouchier,R.A.M.
EPI469182	PB2	China	2011	A/common-teal/Hong-Kong/MPL1075/2011		Other Database Import	Lam,T.T.Y.; Wang,J.; Shen,Y.; Zhou,B.; Duan,L.; Cheung,C.L.; Ma,C.; Lycett,S.J.; Leung,C.Y.H.; Chen,X.; Li,L.; Hong,W.; Chai,Y.; Zhou,L.; Liang,H.; Ou,Z.; Liu,Y.; Farooqui,A.; Kelvin,D.J.; Poon,L.L.M.; Smith,D.K.; Pybus,O.G.; Leung,G.M.; Shu,Y.; Webster,R.G.; Webby,R.J.; Peiris,J.S.M.; Rambaut,A.; Zhu,H.; Guan,Y.
EPI425293	PB2	Vietnam	2011	A/duck/Vietnam/NCVD-669/2011	National Centre of Veterinary Diagnostics	Centers for Disease Control and Prevention
EPI448220	PB2	Bangladesh	2011-Jul-24	A/duck/Bangladesh/4124T/2011	Institute of Epidemiology Disease Control and Research (IEDCR) & Bangladesh National Influenza Centre (NIC)	Centers for Disease Control and Prevention	Gerloff, Nancy; Simpson, Natosha; Poh, Mee;Davis, Todd
EPI340437	PB2	China	2011-Jun-01	A/duck/Zhejiang/0611-15/2011		Other Database Import	Wu,H.; Wu,N.
EPI425517	PB2	Vietnam	2011-Jun-15	A/chicken/Vietnam/NCVD-780/2011	National Centre of Veterinary Diagnostics	Centers for Disease Control and Prevention
EPI401528	PB2	Japan	2011-Mar-01	A/chicken/Chiba/2/2011		Other Database Import	Uchida,Y.; Suzuki,Y.; Shirakura,M.; Kawaguchi,A.; Nobusawa,E.; Tanikawa,T.; Hikono,H.; Takemae,N.; Mase,M.; Kanehira,K.; Hayashi,T.; Tagawa,Y.; Tashiro,M.; Saito,T.
EPI351707	PB2	China	2011-Mar-01	A/chicken/Zhejiang/329/2011		Other Database Import	Wu,H.; Wu,N.
EPI448100	PB2	Bangladesh	2011-Mar-20	A/duck/Bangladesh/1849/2011	Institute of Epidemiology Disease Control and Research (IEDCR) & Bangladesh National Influenza Centre (NIC)	Centers for Disease Control and Prevention	Gerloff, Nancy; Simpson, Natosha; Poh, Mee;Davis, Todd
EPI466311	PB2	China	2011-May-21	A/chicken/Jiangsu/ZJDT/2011	Yangzhou University	Chinese Academy of Sciences	Daxin, P
EPI383206	PB2	China	2011-Nov-29	A/chicken/Guangdong/C273/2011		Other Database Import	Jiao,P.; Yuan,R.; Wei,L.; Jia,B.; Cao,L.; Song,Y.; Gong,L.; Xu,C.; Ren,T.; Liao,M.
EPI574290	PB2	Vietnam	2011-Oct-12	A/muscovy-duck/Vietnam/LBM21/2011		Other Database Import	Soda,K.; Hotta,K.; Trang,H.U.; Le,Q.M.; Yamashiro,T.; Ito,T.; Trang,U.H.
EPI469033	PB2	China	2011-Sep-01	A/chicken/Hong-Kong/YU158/2011		Other Database Import	Lam,T.T.Y.; Wang,J.; Shen,Y.; Zhou,B.; Duan,L.; Cheung,C.L.; Ma,C.; Lycett,S.J.; Leung,C.Y.H.; Chen,X.; Li,L.; Hong,W.; Chai,Y.; Zhou,L.; Liang,H.; Ou,Z.; Liu,Y.; Farooqui,A.; Kelvin,D.J.; Poon,L.L.M.; Smith,D.K.; Pybus,O.G.; Leung,G.M.; Shu,Y.; Webster,R.G.; Webby,R.J.; Peiris,J.S.M.; Rambaut,A.; Zhu,H.; Guan,Y.
EPI703530	PB2	China	2012-Dec-04	A/goose/Eastern-China/L1204/2012		Other Database Import	Sun,H.; Sun,Y.; Pu,J.; Liu,L.; Li,C.; Xu,G.; Qin,M.; Zhang,Y.; Zhao,H.; Wei,K.; Liu,J.
EPI540500	PB2	Bangladesh	2012-Dec-15	A/poultry/Bangladesh/91354/2012	Institute of Epidemiology Disease Control and Research (IEDCR) & Bangladesh National Influenza Centre (NIC)	Centers for Disease Control and Prevention	Gerloff, Nancy; Simpson, Natosha; Davis, C. Todd
EPI510858	PB2	Taiwan	2012-Dec-25	A/chicken/Taiwan/2437/2012		Other Database Import	Lee,C.C.; Zhu,H.; Huang,P.Y.; Peng,L.; Chang,Y.C.; Yip,C.H.; Li,Y.T.; Cheung,C.L.; Compans,R.; Yang,C.; Smith,D.K.; Lam,T.T.; King,C.C.; Guan,Y.; Lam,T.T.Y.
EPI812449	PB2	Bhutan	2012-Feb-14	A/chicken/Bhutan/259/2012		Other Database Import	Franks,J.S.; Tenzin,S.; Tshering,D.; Rai,P.; Lhamo,K.; Dahal,N.; Dukpa,K.
EPI425389	PB2	Vietnam	2012-Feb-16	A/duck/Vietnam/NCVD-1253/2012	National Centre of Veterinary Diagnostics	Centers for Disease Control and Prevention
EPI469055	PB2	China	2012	A/chicken/Hong-Kong/YU150W/2012		Other Database Import	Lam,T.T.Y.; Wang,J.; Shen,Y.; Zhou,B.; Duan,L.; Cheung,C.L.; Ma,C.; Lycett,S.J.; Leung,C.Y.H.; Chen,X.; Li,L.; Hong,W.; Chai,Y.; Zhou,L.; Liang,H.; Ou,Z.; Liu,Y.; Farooqui,A.; Kelvin,D.J.; Poon,L.L.M.; Smith,D.K.; Pybus,O.G.; Leung,G.M.; Shu,Y.; Webster,R.G.; Webby,R.J.; Peiris,J.S.M.; Rambaut,A.; Zhu,H.; Guan,Y.
EPI469057	PB2	China	2012	A/chicken/Hong-Kong/YU262W/2012		Other Database Import	Lam,T.T.Y.; Wang,J.; Shen,Y.; Zhou,B.; Duan,L.; Cheung,C.L.; Ma,C.; Lycett,S.J.; Leung,C.Y.H.; Chen,X.; Li,L.; Hong,W.; Chai,Y.; Zhou,L.; Liang,H.; Ou,Z.; Liu,Y.; Farooqui,A.; Kelvin,D.J.; Poon,L.L.M.; Smith,D.K.; Pybus,O.G.; Leung,G.M.; Shu,Y.; Webster,R.G.; Webby,R.J.; Peiris,J.S.M.; Rambaut,A.; Zhu,H.; Guan,Y.
EPI585425	PB2	India	2012-Jan-04	A/chicken/India/01CA06/2012		Other Database Import	Nagarajan,S.; Syed,Z.; Tosh,C.; Murugkar,H.V.; Kumar,M.; Kulkarni,D.D.
EPI572940	PB2	China	2012-Jul-03	A/chicken/Shanxi/0703/2012		Other Database Import	Pu,J.; Wang,S.; Yin,Y.; Zhang,G.; Carter,R.A.; Wang,J.; Xu,G.; Sun,H.; Wang,M.; Wen,C.; Wei,Y.; Wang,D.; Zhu,B.; Lemmon,G.; Jiao,Y.; Duan,S.; Wang,Q.; Du,Q.; Sun,M.; Bao,J.; Sun,Y.; Zhao,J.; Zhang,H.; Wu,G.; Liu,J.; Webster,R.G.; Lv,N.
EPI461020	PB2	Vietnam	2012-Jul-28	A/duck/Vietnam/QB1207/2012		Other Database Import	Bui,V.N.; Dao,T.D.; Nguyen,L.T.; Nguyen,T.N.T.; Bui,A.N.; Trinh,D.Q.; Inui,K.; Runstadler,J.; Ogawa,H.; Nguyen,K.V.; Imai,K.; Nguyen,T.T.H.
EPI692541	PB2	China	2012-Jun-05	A/duck/Jiangxi/S21055/2012		Other Database Import	Liang,L.; Deng,G.; Shi,J.; Wang,S.; Zhang,Q.; Kong,H.; Gu,C.; Guan,Y.; Suzuki,Y.; Li,Y.; Jiang,Y.; Tian,G.; Liu,L.; Li,C.; Chen,H.
EPI466383	PB2	China	2012-Mar-24	A/chicken/Jiangsu/CZYWP/2012	Yangzhou University	Chinese Academy of Sciences	Daxin, P
EPI440915	PB2	China	2012-Nov-17	A/chicken/Shaanxi/11/2012		Other Database Import	Ren,J.; Wang,J.
EPI540492	PB2	Bangladesh	2012-Nov-29	A/avian/Bangladesh/91286/2012	Institute of Epidemiology Disease Control and Research (IEDCR) & Bangladesh National Influenza Centre (NIC)	Centers for Disease Control and Prevention	Gerloff, Nancy; Simpson, Natosha; Davis, C. Todd
EPI533887	PB2	China	2012-Sep-07	A/duck/Guangxi/125D17/2012		Other Database Import	Wu,A.Q.; Xie,Z.X.; Xie,L.J.; Xie,Q.Z.; Luo,S.S.; Liu,J.B.; Deng,X.W.; Fan,Q.; Pang,Y.S.
EPI532310	PB2	China	2013-Apr-01	A/chicken/Zhejiang/C481/2013		Other Database Import	Wu,H.; Wu,N.; Guo,C.; Li,L.
EPI649172	PB2	China	2013-Apr-01	A/duck/Zhejiang/413/2013		Other Database Import	Wu,H.; Peng,X.; Cheng,L.; Lu,X.; Jin,C.; Xie,T.; Yao,H.; Wu,N.
EPI680667	PB2	China	2013-Apr-08	A/pigeon/Zhejiang/P5/2013		Other Database Import	Wu,H.; Peng,X.; Cheng,L.; Lu,X.; Jin,C.; Xie,T.; Yao,H.; Wu,N.
EPI589826	PB2	Vietnam	2013-Apr-13	A/muscovy-duck/Quang-Ninh/7c121/2013		Other Database Import	Soda,K.; Hotta,K.; Trang,H.U.; Le,Q.M.; Yamashiro,T.; Ito,T.
EPI457850	PB2	China	2013-Apr-16	A/chicken/Jiangsu/SC537/2013	Harbin Veterinary Research Institute (CAAS)	Harbin Veterinary Research Institute (CAAS)	Zhang, Q.; Shi, J.; Deng, G.; Guo, J.; Zeng, X.; He, X.; Kong, H.; Gu, C.; Li, X.; Liu, J.; Wang, G.; Chen, Y.; Liu, L.; Liang, L.; Li, Y.; Fan, J.; Wang, J.; Li, W.; Guan, L.; Li, Q.; Yang, H.; Chen, P.; Jiang, L.; Guan, Y.; Xin, X.; Jiang, Y.; Tian, G.; Wang, X.; Qiao, C.; Li, C.; Bu, Z.; Chen, H.
EPI544889	PB2	China	2013-Apr-25	A/duck/Shandong/Q1/2013		Other Database Import	Li,Q.
EPI544792	PB2	China	2013-Apr-26	A/duck/Shanghai/SH3/2013		Other Database Import	Yang,D.; Liu,J.; Ju,H.; Ge,F.; Wang,J.; Li,X.; Liu,P.; Zhou,J.
EPI775054	PB2	Vietnam	2013-Aug-13	A/chicken/DongNai/0182/2013		Other Database Import	Cao,B.V.; Le Ha,T.D.; Mai,V.N.; Dang Trinh,M.A.; Le Phan,K.N.; Vo Tran,N.T.; Hoang,T.
EPI591584	PB2	China	2013-Aug-25	A/duck/Jiangxi/20189/2013		Other Database Import	Lam,T.Y.; Zhou,B.; Wang,J.; Chai,Y.; Shen,Y.; Chen,X.; Ma,C.; Hong,W.; Chen,Y.; Zhang,Y.; Duan,L.; Chen,P.; Jiang,J.; Li,L.; Poon,L.M.; Webby,R.J.; Smith,D.K.; Leung,G.M.; Peiris,J.M.; Holmes,E.C.; Guan,Y.; Zhu,H.
EPI599747	PB2	China	2013-Dec-08	A/chicken/Jiangxi/31856/2013		Other Database Import	Ma,C.; Lam,T.T.Y.; Chai,Y.; Wang,J.; Fan,X.; Hong,W.; Zhang,Y.; Li,L.; Liu,Y.; Smith,D.K.; Webby,R.J.; Peiris,J.S.M.; Zhu,H.; Guan,Y.
EPI583422	PB2	China	2013-Dec-11	A/chicken/Shenzhen/1098/2013		Other Database Import	Lam,T.Y.; Zhou,B.; Wang,J.; Chai,Y.; Shen,Y.; Chen,X.; Ma,C.; Hong,W.; Chen,Y.; Zhang,Y.; Duan,L.; Chen,P.; Jiang,J.; Li,L.; Poon,L.M.; Webby,R.J.; Smith,D.K.; Leung,G.M.; Peiris,J.M.; Holmes,E.C.; Guan,Y.; Zhu,H.
EPI583500	PB2	China	2013-Dec-12	A/chicken/Shenzhen/1799/2013		Other Database Import	Lam,T.Y.; Zhou,B.; Wang,J.; Chai,Y.; Shen,Y.; Chen,X.; Ma,C.; Hong,W.; Chen,Y.; Zhang,Y.; Duan,L.; Chen,P.; Jiang,J.; Li,L.; Poon,L.M.; Webby,R.J.; Smith,D.K.; Leung,G.M.; Peiris,J.M.; Holmes,E.C.; Guan,Y.; Zhu,H.
EPI602445	PB2	China	2013-Dec-15	A/duck/Jiangxi/33665/2013		Other Database Import	Ma,C.; Lam,T.T.Y.; Chai,Y.; Wang,J.; Fan,X.; Hong,W.; Zhang,Y.; Li,L.; Liu,Y.; Smith,D.K.; Webby,R.J.; Peiris,J.S.M.; Zhu,H.; Guan,Y.
EPI602379	PB2	China	2013-Dec-15	A/duck/Jiangxi/33713/2013		Other Database Import	Ma,C.; Lam,T.T.Y.; Chai,Y.; Wang,J.; Fan,X.; Hong,W.; Zhang,Y.; Li,L.; Liu,Y.; Smith,D.K.; Webby,R.J.; Peiris,J.S.M.; Zhu,H.; Guan,Y.
EPI599877	PB2	China	2013-Dec-15	A/duck/Jiangxi/33779/2013		Other Database Import	Ma,C.; Lam,T.T.Y.; Chai,Y.; Wang,J.; Fan,X.; Hong,W.; Zhang,Y.; Li,L.; Liu,Y.; Smith,D.K.; Webby,R.J.; Peiris,J.S.M.; Zhu,H.; Guan,Y.
EPI600170	PB2	China	2013-Dec-15	A/migratory-duck/Jiangxi/33195/2013		Other Database Import	Ma,C.; Lam,T.T.Y.; Chai,Y.; Wang,J.; Fan,X.; Hong,W.; Zhang,Y.; Li,L.; Liu,Y.; Smith,D.K.; Webby,R.J.; Peiris,J.S.M.; Zhu,H.; Guan,Y.
EPI583584	PB2	China	2013-Dec-18	A/chicken/Dongguan/2754/2013		Other Database Import	Lam,T.Y.; Zhou,B.; Wang,J.; Chai,Y.; Shen,Y.; Chen,X.; Ma,C.; Hong,W.; Chen,Y.; Zhang,Y.; Duan,L.; Chen,P.; Jiang,J.; Li,L.; Poon,L.M.; Webby,R.J.; Smith,D.K.; Leung,G.M.; Peiris,J.M.; Holmes,E.C.; Guan,Y.; Zhu,H.
EPI581684	PB2	China	2013-Dec-18	A/silkie-chicken/Dongguan/3284/2013		Other Database Import	Lam,T.Y.; Zhou,B.; Wang,J.; Chai,Y.; Shen,Y.; Chen,X.; Ma,C.; Hong,W.; Chen,Y.; Zhang,Y.; Duan,L.; Chen,P.; Jiang,J.; Li,L.; Poon,L.M.; Webby,R.J.; Smith,D.K.; Leung,G.M.; Peiris,J.M.; Holmes,E.C.; Guan,Y.; Zhu,H.
EPI583654	PB2	China	2013-Dec-19	A/chicken/Dongguan/3409/2013		Other Database Import	Lam,T.Y.; Zhou,B.; Wang,J.; Chai,Y.; Shen,Y.; Chen,X.; Ma,C.; Hong,W.; Chen,Y.; Zhang,Y.; Duan,L.; Chen,P.; Jiang,J.; Li,L.; Poon,L.M.; Webby,R.J.; Smith,D.K.; Leung,G.M.; Peiris,J.M.; Holmes,E.C.; Guan,Y.; Zhu,H.
EPI581891	PB2	China	2013-Dec-19	A/chicken/Dongguan/3935/2013		Other Database Import	Lam,T.Y.; Zhou,B.; Wang,J.; Chai,Y.; Shen,Y.; Chen,X.; Ma,C.; Hong,W.; Chen,Y.; Zhang,Y.; Duan,L.; Chen,P.; Jiang,J.; Li,L.; Poon,L.M.; Webby,R.J.; Smith,D.K.; Leung,G.M.; Peiris,J.M.; Holmes,E.C.; Guan,Y.; Zhu,H.
EPI601852	PB2	China	2013-Dec-29	A/chicken/Jiangxi/36223/2013		Other Database Import	Ma,C.; Lam,T.T.Y.; Chai,Y.; Wang,J.; Fan,X.; Hong,W.; Zhang,Y.; Li,L.; Liu,Y.; Smith,D.K.; Webby,R.J.; Peiris,J.S.M.; Zhu,H.; Guan,Y.
EPI837955	PB2	China	2013	A/chicken/Sichuan/SIC8/2013		Other Database Import	Liu,Y.; Lai,H.; Li,L.; Chen,R.
EPI469018	PB2	China	2013	A/chicken/Wenzhou/640/2013		Other Database Import	Lam,T.T.Y.; Wang,J.; Shen,Y.; Zhou,B.; Duan,L.; Cheung,C.L.; Ma,C.; Lycett,S.J.; Leung,C.Y.H.; Chen,X.; Li,L.; Hong,W.; Chai,Y.; Zhou,L.; Liang,H.; Ou,Z.; Liu,Y.; Farooqui,A.; Kelvin,D.J.; Poon,L.L.M.; Smith,D.K.; Pybus,O.G.; Leung,G.M.; Shu,Y.; Webster,R.G.; Webby,R.J.; Peiris,J.S.M.; Rambaut,A.; Zhu,H.; Guan,Y.
EPI898650	PB2	Vietnam	2013-Jan-09	A/chicken/Vietnam/NCVD-2693/2013		Other Database Import	Davis,T.; Jang,Y.
EPI510795	PB2	Taiwan	2013-Jan-10	A/duck/Taiwan/4376/2013		Other Database Import	Lee,C.C.; Zhu,H.; Huang,P.Y.; Peng,L.; Chang,Y.C.; Yip,C.H.; Li,Y.T.; Cheung,C.L.; Compans,R.; Yang,C.; Smith,D.K.; Lam,T.T.; King,C.C.; Guan,Y.; Lam,T.T.Y.
EPI466455	PB2	China	2013-Jan-23	A/chicken/Jiangsu/ZJ4/2013	Yangzhou University	Chinese Academy of Sciences	Daxin, P
EPI1060961	PB2	China	2013-Jul-07	A/duck/Zhejiang/7731/2013		Other Database Import	Wu,H.; Lu,R.; Peng,X.; Liu,F.; Cheng,L.; Wu,N.
EPI598951	PB2	China	2013-Jul-10	A/duck/Wuxi/2/2013		Other Database Import	Ma,M.J.; Yang,X.X.; Qian,Y.H.; Zhao,S.Y.; Hua,S.; Wang,T.C.; Chen,S.H.; Ma,G.Y.; Sang,X.Y.; Liu,L.N.; Wu,A.P.; Jiang,T.J.; Gao,Y.W.; Gray,G.C.; Zhao,T.; Ling,X.; Wang,J.L.; Lu,B.; Qian,J.; Cao,W.C.; Ma,M. J.; Yang,X. X.; Cao,W. C.
EPI1060964	PB2	China	2013-Jul-17	A/duck/Zhejiang/71731/2013		Other Database Import	Wu,H.; Lu,R.; Peng,X.; Liu,F.; Cheng,L.; Wu,N.
EPI1060965	PB2	China	2013-Jul-17	A/duck/Zhejiang/71737/2013		Other Database Import	Wu,H.; Lu,R.; Peng,X.; Liu,F.; Cheng,L.; Wu,N.
EPI600052	PB2	China	2013-Jul-21	A/chicken/Jiangxi/17403/2013		Other Database Import	Ma,C.; Lam,T.T.Y.; Chai,Y.; Wang,J.; Fan,X.; Hong,W.; Zhang,Y.; Li,L.; Liu,Y.; Smith,D.K.; Webby,R.J.; Peiris,J.S.M.; Zhu,H.; Guan,Y.
EPI471170	PB2	Vietnam	2013-Jun-05	A/muscovy-duck/Vietnam/LBM436/2013		Other Database Import	Nakamura,Y.; Soda,K.; Hotta,K.; Lee,M.Q.; Ito,T.
EPI572958	PB2	China	2013-Mar-07	A/chicken/Shandong/qd0307/2013		Other Database Import	Pu,J.; Wang,S.; Yin,Y.; Zhang,G.; Carter,R.A.; Wang,J.; Xu,G.; Sun,H.; Wang,M.; Wen,C.; Wei,Y.; Wang,D.; Zhu,B.; Lemmon,G.; Jiao,Y.; Duan,S.; Wang,Q.; Du,Q.; Sun,M.; Bao,J.; Sun,Y.; Zhao,J.; Zhang,H.; Wu,G.; Liu,J.; Webster,R.G.; Lv,N.
EPI530979	PB2	China	2013-Nov-14	A/duck/Zhejiang/W24/2013		Other Database Import	Wu,H.; Peng,X.; Xu,L.; Jin,C.; Cheng,L.; Lu,X.; Xie,T.; Yao,H.; Wu,N.
EPI680638	PB2	China	2013-Oct-16	A/chicken/Zhejiang/C46/2013		Other Database Import	Wu,H.; Peng,X.; Cheng,L.; Lu,X.; Jin,C.; Xie,T.; Yao,H.; Wu,N.
EPI534803	PB2	China	2013-Oct-16	A/duck/Zhejiang/D16/2013		Other Database Import	Wu,H.; Wu,N.; Peng,X.; Jin,C.; Lu,X.; Cheng,L.; Yao,H.; Li,L.
EPI594478	PB2	China	2013-Oct-20	A/chicken/Shaoxing/2414/2013		Other Database Import	Lam,T.Y.; Zhou,B.; Wang,J.; Chai,Y.; Shen,Y.; Chen,X.; Ma,C.; Hong,W.; Chen,Y.; Zhang,Y.; Duan,L.; Chen,P.; Jiang,J.; Li,L.; Poon,L.M.; Webby,R.J.; Smith,D.K.; Leung,G.M.; Peiris,J.M.; Holmes,E.C.; Guan,Y.; Zhu,H.
EPI596710	PB2	China	2013-Oct-23	A/chicken/Wenzhou/3330/2013		Other Database Import	Lam,T.Y.; Zhou,B.; Wang,J.; Chai,Y.; Shen,Y.; Chen,X.; Ma,C.; Hong,W.; Chen,Y.; Zhang,Y.; Duan,L.; Chen,P.; Jiang,J.; Li,L.; Poon,L.M.; Webby,R.J.; Smith,D.K.; Leung,G.M.; Peiris,J.M.; Holmes,E.C.; Guan,Y.; Zhu,H.
EPI582352	PB2	China	2013-Oct-24	A/chicken/Huzhou/3791/2013		Other Database Import	Lam,T.Y.; Zhou,B.; Wang,J.; Chai,Y.; Shen,Y.; Chen,X.; Ma,C.; Hong,W.; Chen,Y.; Zhang,Y.; Duan,L.; Chen,P.; Jiang,J.; Li,L.; Poon,L.M.; Webby,R.J.; Smith,D.K.; Leung,G.M.; Peiris,J.M.; Holmes,E.C.; Guan,Y.; Zhu,H.
EPI582981	PB2	China	2013-Oct-24	A/chicken/Huzhou/4076/2013		Other Database Import	Lam,T.Y.; Zhou,B.; Wang,J.; Chai,Y.; Shen,Y.; Chen,X.; Ma,C.; Hong,W.; Chen,Y.; Zhang,Y.; Duan,L.; Chen,P.; Jiang,J.; Li,L.; Poon,L.M.; Webby,R.J.; Smith,D.K.; Leung,G.M.; Peiris,J.M.; Holmes,E.C.; Guan,Y.; Zhu,H.
EPI592015	PB2	China	2013-Oct-29	A/chicken/Shaoxing/5493/2013		Other Database Import	Lam,T.Y.; Zhou,B.; Wang,J.; Chai,Y.; Shen,Y.; Chen,X.; Ma,C.; Hong,W.; Chen,Y.; Zhang,Y.; Duan,L.; Chen,P.; Jiang,J.; Li,L.; Poon,L.M.; Webby,R.J.; Smith,D.K.; Leung,G.M.; Peiris,J.M.; Holmes,E.C.; Guan,Y.; Zhu,H.
EPI592489	PB2	China	2014-Apr-06	A/chicken/Jiangxi/13515/2014		Other Database Import	Lam,T.Y.; Zhou,B.; Wang,J.; Chai,Y.; Shen,Y.; Chen,X.; Ma,C.; Hong,W.; Chen,Y.; Zhang,Y.; Duan,L.; Chen,P.; Jiang,J.; Li,L.; Poon,L.M.; Webby,R.J.; Smith,D.K.; Leung,G.M.; Peiris,J.M.; Holmes,E.C.; Guan,Y.; Zhu,H.
EPI592574	PB2	China	2014-Apr-06	A/chicken/Jiangxi/13543/2014		Other Database Import	Lam,T.Y.; Zhou,B.; Wang,J.; Chai,Y.; Shen,Y.; Chen,X.; Ma,C.; Hong,W.; Chen,Y.; Zhang,Y.; Duan,L.; Chen,P.; Jiang,J.; Li,L.; Poon,L.M.; Webby,R.J.; Smith,D.K.; Leung,G.M.; Peiris,J.M.; Holmes,E.C.; Guan,Y.; Zhu,H.
EPI1036023	PB2	China	2014-Apr-14	A/pigeon/Guangxi/164/2014		Other Database Import	Li,M.; Xie,Z.X.; Xie,L.J.; Deng,X.W.; Xie,Q.Z.; Liu,J.B.; Fan,Q.; Pang,Y.S.; Luo,S.S.
EPI593228	PB2	China	2014-Apr-16	A/chicken/Shantou/2556/2014		Other Database Import	Lam,T.Y.; Zhou,B.; Wang,J.; Chai,Y.; Shen,Y.; Chen,X.; Ma,C.; Hong,W.; Chen,Y.; Zhang,Y.; Duan,L.; Chen,P.; Jiang,J.; Li,L.; Poon,L.M.; Webby,R.J.; Smith,D.K.; Leung,G.M.; Peiris,J.M.; Holmes,E.C.; Guan,Y.; Zhu,H.
EPI593235	PB2	China	2014-Apr-16	A/chicken/Shantou/2562/2014		Other Database Import	Lam,T.Y.; Zhou,B.; Wang,J.; Chai,Y.; Shen,Y.; Chen,X.; Ma,C.; Hong,W.; Chen,Y.; Zhang,Y.; Duan,L.; Chen,P.; Jiang,J.; Li,L.; Poon,L.M.; Webby,R.J.; Smith,D.K.; Leung,G.M.; Peiris,J.M.; Holmes,E.C.; Guan,Y.; Zhu,H.
EPI592643	PB2	China	2014-Apr-20	A/chicken/Jiangxi/14479/2014		Other Database Import	Lam,T.Y.; Zhou,B.; Wang,J.; Chai,Y.; Shen,Y.; Chen,X.; Ma,C.; Hong,W.; Chen,Y.; Zhang,Y.; Duan,L.; Chen,P.; Jiang,J.; Li,L.; Poon,L.M.; Webby,R.J.; Smith,D.K.; Leung,G.M.; Peiris,J.M.; Holmes,E.C.; Guan,Y.; Zhu,H.
EPI683179	PB2	China	2014-Dec-01	A/turtledove/Wuhan/WHBJ12/2014		Other Database Import	Chen,L. J.; Lin,X. D.; Guo,W. P.; Tian,J. H.; Zhang,Y. Z.
EPI969332	PB2	Korea,-Republic-of	2014-Dec-02	A/wild-bird/Korea/SK14/2014		Other Database Import	Koo,B. S.; Yoon,S. W.
EPI845897	PB2	Japan	2014-Dec-19	A/mandarin-duck/Gifu/2112D001/2014		Other Database Import	Usui,T.; Soda,K.; Tomioka,Y.; Okamura,M.; Ishihara,T.; Yano,M.; Yabuta,T.; Takakuwa,H.; Otsuki,K.; Ito,H.; Ito,T.; Yamaguchi,T.
EPI895327	PB2	China	2014-Dec-22	A/Anser-fabalis/China/Anhui/L180/2014		Other Database Import	Ye,G.; Liang,C.H.; Ping,H.Y.; Hua,D.G.; Cheng,Y.Q.
EPI895343	PB2	China	2014-Dec-22	A/Anser-fabalis/China/Anhui/L256/2014		Other Database Import	Ye,G.; Liang,C.H.; Ping,H.Y.; Hua,D.G.; Cheng,Y.Q.
EPI561672	PB2	Korea,-Republic-of	2014-Feb-01	A/bean-goose/Korea/H328/2014		Other Database Import	Jeong,J.; Kang,H.M.; Lee,E.K.; Song,B.M.; Kwon,Y.K.; Kim,H.R.; Choi,K.S.; Kim,J.Y.; Lee,H.J.; Moon,O.K.; Jeong,W.; Choi,J.; Baek,J.H.; Joo,Y.S.; Park,Y.H.; Lee,H.S.; Lee,Y.J.; Lee,Y. J.; Kang,H. M.; Lee,E. K.; Song,B. M.; Lee,K. J.; Hong,M. S.
EPI703534	PB2	China	2014-Feb-15	A/duck/Eastern-China/S0215/2014		Other Database Import	Sun,H.; Sun,Y.; Pu,J.; Liu,L.; Li,C.; Xu,G.; Qin,M.; Zhang,Y.; Zhao,H.; Wei,K.; Liu,J.
EPI594274	PB2	China	2014-Feb-18	A/chicken/Jiangxi/10953/2014		Other Database Import	Lam,T.Y.; Zhou,B.; Wang,J.; Chai,Y.; Shen,Y.; Chen,X.; Ma,C.; Hong,W.; Chen,Y.; Zhang,Y.; Duan,L.; Chen,P.; Jiang,J.; Li,L.; Poon,L.M.; Webby,R.J.; Smith,D.K.; Leung,G.M.; Peiris,J.M.; Holmes,E.C.; Guan,Y.; Zhu,H.
EPI594323	PB2	China	2014-Feb-18	A/chicken/Jiangxi/10961/2014		Other Database Import	Lam,T.Y.; Zhou,B.; Wang,J.; Chai,Y.; Shen,Y.; Chen,X.; Ma,C.; Hong,W.; Chen,Y.; Zhang,Y.; Duan,L.; Chen,P.; Jiang,J.; Li,L.; Poon,L.M.; Webby,R.J.; Smith,D.K.; Leung,G.M.; Peiris,J.M.; Holmes,E.C.; Guan,Y.; Zhu,H.
EPI597270	PB2	China	2014-Feb-20	A/chicken/Dongguan/749/2014		Other Database Import	Lam,T.Y.; Zhou,B.; Wang,J.; Chai,Y.; Shen,Y.; Chen,X.; Ma,C.; Hong,W.; Chen,Y.; Zhang,Y.; Duan,L.; Chen,P.; Jiang,J.; Li,L.; Poon,L.M.; Webby,R.J.; Smith,D.K.; Leung,G.M.; Peiris,J.M.; Holmes,E.C.; Guan,Y.; Zhu,H.
EPI597322	PB2	China	2014-Feb-20	A/chicken/Dongguan/836/2014		Other Database Import	Lam,T.Y.; Zhou,B.; Wang,J.; Chai,Y.; Shen,Y.; Chen,X.; Ma,C.; Hong,W.; Chen,Y.; Zhang,Y.; Duan,L.; Chen,P.; Jiang,J.; Li,L.; Poon,L.M.; Webby,R.J.; Smith,D.K.; Leung,G.M.; Peiris,J.M.; Holmes,E.C.; Guan,Y.; Zhu,H.
EPI596852	PB2	China	2014-Feb-20	A/chicken/Dongguan/856/2014		Other Database Import	Lam,T.Y.; Zhou,B.; Wang,J.; Chai,Y.; Shen,Y.; Chen,X.; Ma,C.; Hong,W.; Chen,Y.; Zhang,Y.; Duan,L.; Chen,P.; Jiang,J.; Li,L.; Poon,L.M.; Webby,R.J.; Smith,D.K.; Leung,G.M.; Peiris,J.M.; Holmes,E.C.; Guan,Y.; Zhu,H.
EPI528351	PB2	China	2014-Feb-20	A/Chicken/Jilin/13199/2014	WHO Chinese National Influenza Center	WHO Chinese National Influenza Center	Wang,Dayan;Gao,Rongbao;Yang,Lei;Zhou,Shumei;Li,Xiyan;Zhou,Jianfang;Zhu,Wenfei;Guo,Junfeng;Li,Xiaodan;Dong,Jie;Huang,Weijuan;Zhang,Ye;Dong,Libo;Zhao,Xiang;Lu,Jian;Lan,Yu;Shu,Yuelong
EPI898445	PB2	Vietnam	2014-Feb-20	A/chicken/Vietnam/NCVD14-A461/2014		Other Database Import	Davis,T.; Jang,Y.
EPI597570	PB2	China	2014-Feb-21	A/chicken/Dongguan/1415/2014		Other Database Import	Lam,T.Y.; Zhou,B.; Wang,J.; Chai,Y.; Shen,Y.; Chen,X.; Ma,C.; Hong,W.; Chen,Y.; Zhang,Y.; Duan,L.; Chen,P.; Jiang,J.; Li,L.; Poon,L.M.; Webby,R.J.; Smith,D.K.; Leung,G.M.; Peiris,J.M.; Holmes,E.C.; Guan,Y.; Zhu,H.
EPI597094	PB2	China	2014-Feb-21	A/chicken/Dongguan/1523/2014		Other Database Import	Lam,T.Y.; Zhou,B.; Wang,J.; Chai,Y.; Shen,Y.; Chen,X.; Ma,C.; Hong,W.; Chen,Y.; Zhang,Y.; Duan,L.; Chen,P.; Jiang,J.; Li,L.; Poon,L.M.; Webby,R.J.; Smith,D.K.; Leung,G.M.; Peiris,J.M.; Holmes,E.C.; Guan,Y.; Zhu,H.
EPI837626	PB2	China	2014-Feb-26	A/migratory-waterfowl/Hubei/Chenhu1347/2014		Other Database Import	Bi,Y.; Liu,H.; Xiong,C.; Di,Liu.; Shi,W.; Li,M.; Liu,S.; Chen,J.; Chen,G.; Li,Y.; Yang,G.; Lei,Y.; Xiong,Y.; Lei,F.; Wang,H.; Chen,Q.; Gao,G.F.
EPI601382	PB2	China	2014-Jan-05	A/chicken/Jiangxi/1244/2014		Other Database Import	Ma,C.; Lam,T.T.Y.; Chai,Y.; Wang,J.; Fan,X.; Hong,W.; Zhang,Y.; Li,L.; Liu,Y.; Smith,D.K.; Webby,R.J.; Peiris,J.S.M.; Zhu,H.; Guan,Y.
EPI601970	PB2	China	2014-Jan-05	A/chicken/Jiangxi/1271/2014		Other Database Import	Ma,C.; Lam,T.T.Y.; Chai,Y.; Wang,J.; Fan,X.; Hong,W.; Zhang,Y.; Li,L.; Liu,Y.; Smith,D.K.; Webby,R.J.; Peiris,J.S.M.; Zhu,H.; Guan,Y.
EPI653005	PB2	China	2014-Jan-10	A/chicken/Qingdao/014/2014		Other Database Import	Wang,K.; Zhuang,Q.; Chen,J.
EPI601271	PB2	China	2014-Jan-12	A/chicken/Jiangxi/3119/2014		Other Database Import	Ma,C.; Lam,T.T.Y.; Chai,Y.; Wang,J.; Fan,X.; Hong,W.; Zhang,Y.; Li,L.; Liu,Y.; Smith,D.K.; Webby,R.J.; Peiris,J.S.M.; Zhu,H.; Guan,Y.
EPI602461	PB2	China	2014-Jan-12	A/chicken/Jiangxi/3152/2014		Other Database Import	Ma,C.; Lam,T.T.Y.; Chai,Y.; Wang,J.; Fan,X.; Hong,W.; Zhang,Y.; Li,L.; Liu,Y.; Smith,D.K.; Webby,R.J.; Peiris,J.S.M.; Zhu,H.; Guan,Y.
EPI509702	PB2	Korea,-Republic-of	2014-Jan-17	A/broiler-duck/Korea/Buan2/2014		Other Database Import	Lee,Y. J.; Kang,H. M.; Lee,E. K.; Song,B. M.; Jeong,J.; Kwon,Y. K.; Kim,H. R.; Lee,K. J.; Hong,M. S.; Jang,I.; Choi,K. S.; Kim,J. Y.; Lee,H. J.; Kang,M. S.; Jeong,O. M.; Baek,J. H.; Joo,Y. S.; Park,Y.Ho.; Lee,H. S.; Park,Y.H.
EPI672771	PB2	China	2014-Jan-20	A/wildfowl/China/472/2014	Institute of Poultry Science, Shandong, Academy of Agricultural Science	South China Agricultural University	Wang, Youling
EPI561540	PB2	Korea,-Republic-of	2014-Jan-22	A/Baikal-teal/Korea/H68/2014		Other Database Import	Jeong,J.; Kang,H.M.; Lee,E.K.; Song,B.M.; Kwon,Y.K.; Kim,H.R.; Choi,K.S.; Kim,J.Y.; Lee,H.J.; Moon,O.K.; Jeong,W.; Choi,J.; Baek,J.H.; Joo,Y.S.; Park,Y.H.; Lee,H.S.; Lee,Y.J.; Lee,Y. J.; Kang,H. M.; Lee,E. K.; Song,B. M.; Lee,K. J.; Hong,M. S.
EPI561589	PB2	Korea,-Republic-of	2014-Jan-25	A/breeder-duck/Korea/H128/2014		Other Database Import	Jeong,J.; Kang,H.M.; Lee,E.K.; Song,B.M.; Kwon,Y.K.; Kim,H.R.; Choi,K.S.; Kim,J.Y.; Lee,H.J.; Moon,O.K.; Jeong,W.; Choi,J.; Baek,J.H.; Joo,Y.S.; Park,Y.H.; Lee,H.S.; Lee,Y.J.; Lee,Y. J.; Kang,H. M.; Lee,E. K.; Song,B. M.; Lee,K. J.; Hong,M. S.
EPI561596	PB2	Korea,-Republic-of	2014-Jan-25	A/broiler-duck/Korea/H133/2014		Other Database Import	Jeong,J.; Kang,H.M.; Lee,E.K.; Song,B.M.; Kwon,Y.K.; Kim,H.R.; Choi,K.S.; Kim,J.Y.; Lee,H.J.; Moon,O.K.; Jeong,W.; Choi,J.; Baek,J.H.; Joo,Y.S.; Park,Y.H.; Lee,H.S.; Lee,Y.J.; Lee,Y. J.; Kang,H. M.; Lee,E. K.; Song,B. M.; Lee,K. J.; Hong,M. S.
EPI647442	PB2	China	2014-Jul-01	A/chicken/Zhejiang/727031/2014		Other Database Import	Wu,H.; Peng,X.; Cheng,L.; Wu,N.
EPI681047	PB2	China	2014-Jul-07	A/chicken/Zhejiang/77082/2014		Other Database Import	Wu,H.; Peng,X.; Cheng,L.; Lu,X.; Jin,C.; Xie,T.; Yao,H.; Wu,N.
EPI649157	PB2	China	2014-Jul-07	A/duck/Zhejiang/77127/2014		Other Database Import	Wu,H.; Peng,X.; Cheng,L.; Lu,X.; Jin,C.; Xie,T.; Yao,H.; Wu,N.
EPI681191	PB2	China	2014-Jul-07	A/goose/Zhejiang/77167/2014		Other Database Import	Wu,H.; Peng,X.; Cheng,L.; Lu,X.; Jin,C.; Xie,T.; Yao,H.; Wu,N.
EPI681075	PB2	China	2014-Jul-07	A/pigeon/Zhejiang/77037/2014		Other Database Import	Wu,H.; Peng,X.; Cheng,L.; Lu,X.; Jin,C.; Xie,T.; Yao,H.; Wu,N.
EPI681206	PB2	China	2014-Jul-27	A/chicken/Zhejiang/727155/2014		Other Database Import	Wu,H.; Peng,X.; Cheng,L.; Lu,X.; Jin,C.; Xie,T.; Yao,H.; Wu,N.
EPI681196	PB2	China	2014-Jul-27	A/goose/Zhejiang/727092/2014		Other Database Import	Wu,H.; Peng,X.; Cheng,L.; Lu,X.; Jin,C.; Xie,T.; Yao,H.; Wu,N.
EPI681076	PB2	China	2014-Jul-27	A/pigeon/Zhejiang/727044/2014		Other Database Import	Wu,H.; Peng,X.; Cheng,L.; Lu,X.; Jin,C.; Xie,T.; Yao,H.; Wu,N.
EPI585729	PB2	China	2014-Jun-01	A/swan-goose/Jilin/JL01/2014		Other Database Import	Yu,Z.; Wang,T.; Gao,X.; Gao,Y.; Xia,X.
EPI593370	PB2	China	2014-Jun-07	A/chicken/Jiangxi/17989/2014		Other Database Import	Lam,T.Y.; Zhou,B.; Wang,J.; Chai,Y.; Shen,Y.; Chen,X.; Ma,C.; Hong,W.; Chen,Y.; Zhang,Y.; Duan,L.; Chen,P.; Jiang,J.; Li,L.; Poon,L.M.; Webby,R.J.; Smith,D.K.; Leung,G.M.; Peiris,J.M.; Holmes,E.C.; Guan,Y.; Zhu,H.
EPI644459	PB2	China	2014-Mar-01	A/chicken/Zhejiang/2C66/2014		Other Database Import	Wu,H.; Lu,R.; Wu,X.; Peng,X.; Xu,L.; Cheng,L.; Lu,X.; Jin,C.; Xie,T.; Yao,H.; Wu,N.
EPI592029	PB2	China	2014-Mar-16	A/chicken/Jiangxi/12210/2014		Other Database Import	Lam,T.Y.; Zhou,B.; Wang,J.; Chai,Y.; Shen,Y.; Chen,X.; Ma,C.; Hong,W.; Chen,Y.; Zhang,Y.; Duan,L.; Chen,P.; Jiang,J.; Li,L.; Poon,L.M.; Webby,R.J.; Smith,D.K.; Leung,G.M.; Peiris,J.M.; Holmes,E.C.; Guan,Y.; Zhu,H.
EPI592043	PB2	China	2014-Mar-16	A/chicken/Jiangxi/12221/2014		Other Database Import	Lam,T.Y.; Zhou,B.; Wang,J.; Chai,Y.; Shen,Y.; Chen,X.; Ma,C.; Hong,W.; Chen,Y.; Zhang,Y.; Duan,L.; Chen,P.; Jiang,J.; Li,L.; Poon,L.M.; Webby,R.J.; Smith,D.K.; Leung,G.M.; Peiris,J.M.; Holmes,E.C.; Guan,Y.; Zhu,H.
EPI592373	PB2	China	2014-Mar-16	A/chicken/Jiangxi/12243/2014		Other Database Import	Lam,T.Y.; Zhou,B.; Wang,J.; Chai,Y.; Shen,Y.; Chen,X.; Ma,C.; Hong,W.; Chen,Y.; Zhang,Y.; Duan,L.; Chen,P.; Jiang,J.; Li,L.; Poon,L.M.; Webby,R.J.; Smith,D.K.; Leung,G.M.; Peiris,J.M.; Holmes,E.C.; Guan,Y.; Zhu,H.
EPI600209	PB2	China	2014-Mar-30	A/chicken/Jiangxi/13202/2014		Other Database Import	Ma,C.; Lam,T.T.Y.; Chai,Y.; Wang,J.; Fan,X.; Hong,W.; Zhang,Y.; Li,L.; Liu,Y.; Smith,D.K.; Webby,R.J.; Peiris,J.S.M.; Zhu,H.; Guan,Y.
EPI602242	PB2	China	2014-Mar-30	A/chicken/Jiangxi/13217/2014		Other Database Import	Ma,C.; Lam,T.T.Y.; Chai,Y.; Wang,J.; Fan,X.; Hong,W.; Zhang,Y.; Li,L.; Liu,Y.; Smith,D.K.; Webby,R.J.; Peiris,J.S.M.; Zhu,H.; Guan,Y.
EPI592134	PB2	China	2014-Mar-30	A/chicken/Jiangxi/13230/2014		Other Database Import	Lam,T.Y.; Zhou,B.; Wang,J.; Chai,Y.; Shen,Y.; Chen,X.; Ma,C.; Hong,W.; Chen,Y.; Zhang,Y.; Duan,L.; Chen,P.; Jiang,J.; Li,L.; Poon,L.M.; Webby,R.J.; Smith,D.K.; Leung,G.M.; Peiris,J.M.; Holmes,E.C.; Guan,Y.; Zhu,H.
EPI602270	PB2	China	2014-Mar-30	A/chicken/Jiangxi/13238/2014		Other Database Import	Ma,C.; Lam,T.T.Y.; Chai,Y.; Wang,J.; Fan,X.; Hong,W.; Zhang,Y.; Li,L.; Liu,Y.; Smith,D.K.; Webby,R.J.; Peiris,J.S.M.; Zhu,H.; Guan,Y.
EPI602211	PB2	China	2014-Mar-30	A/chicken/Jiangxi/13249/2014		Other Database Import	Ma,C.; Lam,T.T.Y.; Chai,Y.; Wang,J.; Fan,X.; Hong,W.; Zhang,Y.; Li,L.; Liu,Y.; Smith,D.K.; Webby,R.J.; Peiris,J.S.M.; Zhu,H.; Guan,Y.
EPI602158	PB2	China	2014-Mar-30	A/chicken/Jiangxi/13274/2014		Other Database Import	Ma,C.; Lam,T.T.Y.; Chai,Y.; Wang,J.; Fan,X.; Hong,W.; Zhang,Y.; Li,L.; Liu,Y.; Smith,D.K.; Webby,R.J.; Peiris,J.S.M.; Zhu,H.; Guan,Y.
EPI964944	PB2	Bangladesh	2014-Nov-16	A/duck/Bangladesh/23858/2014		Other Database Import	Marinova Petkova,A.; Shanmuganatham,K.; Feeroz,M.M.; Jones Engel,L.; Hasan,M.K.; Akhtar,S.; Turner,J.; Walker,D.; Seiler,P.; Franks,J.; McKenzie,P.; Krauss,S.; Webby,R.J.; Webster,R.G.; Hasan,K.; Seiler,J.
EPI1060957	PB2	China	2014-Nov-20	A/goose/Zhejiang/1120078/2014		Other Database Import	Wu,H.; Lu,R.; Peng,X.; Liu,F.; Cheng,L.; Wu,N.
EPI1060959	PB2	China	2014-Nov-20	A/goose/Zhejiang/1120084/2014		Other Database Import	Wu,H.; Lu,R.; Peng,X.; Liu,F.; Cheng,L.; Wu,N.
EPI681186	PB2	China	2014-Nov-20	A/goose/Zhejiang/112071/2014		Other Database Import	Wu,H.; Peng,X.; Cheng,L.; Lu,X.; Jin,C.; Xie,T.; Yao,H.; Wu,N.
EPI580272	PB2	China	2014-Nov-30	A/Chicken/Guangdong/DG479/2014	South China Agricultural University	South China Agricultural University	Shumin,Xie;Weixin,Jia;Yicun,Lin;Kaixiang,Xing;Xingxing,Ren;Wenbao,Qi;Ming,Liao
EPI736688	PB2	China	2014-Oct-12	A/duck/Guizhou/013/2014		Other Database Import	Duan,Z.; Chen,J.; Ji,X.; Xu,H.; Ruan,Y.; Zhao,J.
EPI596607	PB2	Vietnam	2014-Oct-13	A/duck/Vietnam/LBM758/2014		Other Database Import	Soda,K.; Hotta,K.; Trang,H.U.; Le,Q.M.; Yamashiro,T.; Ito,T.
EPI596583	PB2	Vietnam	2014-Oct-13	A/muscovy-duck/Vietnam/LBM754/2014		Other Database Import	Soda,K.; Hotta,K.; Trang,H.U.; Le,Q.M.; Yamashiro,T.; Ito,T.
EPI839144	PB2	China	2014-Sep-08	A/Gallinula-chloropus/Guangdong/GZ174/2014		Other Database Import	Kang,Y.; Feng,M.; Ren,T.
EPI681055	PB2	China	2014-Sep-25	A/chicken/Zhejiang/925134/2014		Other Database Import	Wu,H.; Peng,X.; Cheng,L.; Lu,X.; Jin,C.; Xie,T.; Yao,H.; Wu,N.
EPI681200	PB2	China	2014-Sep-25	A/goose/Zhejiang/925106/2014		Other Database Import	Wu,H.; Peng,X.; Cheng,L.; Lu,X.; Jin,C.; Xie,T.; Yao,H.; Wu,N.
EPI760210	PB2	China	2015-Apr-06	A/duck/Hunan/161/2015		Other Database Import	Li,X.; Yang,J.; Liu,B.; Jia,Y.; Guo,J.; Gao,X.; Weng,S.; Yang,M.; Wang,L.; Wang,L.F.; Cui,J.; Chen,H.; Zhu,Q.
EPI1060772	PB2	Hong-Kong-(SAR)	2015-Apr-30	A/oriental-magpie-robin/HK/6154/2015		Other Database Import	Hui,P.Y.; Chan,L.Y.; Kuok,I.T.; Mok,K.P.; Yang,Z.; Li,R.; Luk,S.M.; Lee,F.; Yen,H.L.; Zhu,H.; Guan,Y.; Nicholls,J.; Peiris,M.; Chan,C.W.
EPI965499	PB2	Bangladesh	2015-Aug-25	A/quail/Bangladesh/25987/2015		Other Database Import	Barman,S.; Marinova Petkova,A.; Hasan,M.K.; Akhtar,S.; Turner,J.C.; Franks,J.; Walker,D.; Seiler,P.; Friedman,K.; Kercher,L.; Kayali,G.; Jones Engel,L.; McKenzie,P.; Krauss,S.; Webby,R.J.; Feeroz,M.M.; Webster,R.G.
EPI693703	PB2	Mongolia	2015-Aug-30	A/duck/Mongolia/83/2015		Other Database Import	Matsuno,K.; Okamatsu,M.; Kida,H.; Sakoda,Y.; Matuno,K.; Hatamachi,J.
EPI895223	PB2	China	2015-Dec-12	A/chicken/Ganzhou/GZ27/2015		Other Database Import	Chen,L.J.; Tian,J.H.; Lin,X.D.; Liao,Y.; Shi,M.; Zhang,Y.Z.
EPI683197	PB2	China	2015	A/chicken/Wenzhou/RAQL01/2015		Other Database Import	Chen,L. J.; Lin,X. D.; Guo,W. P.; Tian,J. H.; Zhang,Y. Z.
EPI683183	PB2	China	2015	A/turtledove/Wuhan/HKBJ43/2015		Other Database Import	Chen,L. J.; Lin,X. D.; Guo,W. P.; Tian,J. H.; Zhang,Y. Z.
EPI775078	PB2	Vietnam	2015-Jan-06	A/duck/CaMau/0237/2015		Other Database Import	Cao,B.V.; Le Ha,T.D.; Mai,V.N.; Dang Trinh,M.A.; Le Phan,K.N.; Vo Tran,N.T.; Hoang,T.
EPI775086	PB2	Vietnam	2015-Jan-06	A/duck/CaMau/0238/2015		Other Database Import	Cao,B.V.; Le Ha,T.D.; Mai,V.N.; Dang Trinh,M.A.; Le Phan,K.N.; Vo Tran,N.T.; Hoang,T.
EPI590547	PB2	Taiwan	2015-Jan-15	A/chicken/PT/a158/2015		Other Database Import	Cheng,M. C.; Tan,D. H.; Chen,L. H.; Liu,Y. P.; Lin,Y. J.; Tsai,H. J.; Chang,P. C.
EPI690541	PB2	Taiwan	2015-Jan-17	A/goose/Taiwan/TNC4/2015		Other Database Import	Huang,P.Y.; Lee,C.D.; Yip,C.H.; Cheung,C.L.; Yu,G.; Lam,T.T.; Smith,D.K.; Zhu,H.; Guan,Y.; Lee,C.C.; Lam,T.Y.
EPI690717	PB2	Taiwan	2015-Jan-17	A/goose/Taiwan/TNO12/2015		Other Database Import	Huang,P.Y.; Lee,C.D.; Yip,C.H.; Cheung,C.L.; Yu,G.; Lam,T.T.; Smith,D.K.; Zhu,H.; Guan,Y.; Lee,C.C.; Lam,T.Y.
EPI946747	PB2	Japan	2015-Jul-07	A/chicken/Japan/AQ-HE61/2015		Other Database Import	Shibata,A.; Hiono,T.; Okamatsu,M.; Osaka,H.; Sakoda,Y.
EPI965187	PB2	Bangladesh	2015-Jul-10	A/duck/Bangladesh/25891/2015		Other Database Import	Barman,S.; Marinova Petkova,A.; Hasan,M.K.; Akhtar,S.; Turner,J.C.; Franks,J.; Walker,D.; Seiler,P.; Friedman,K.; Kercher,L.; Kayali,G.; Jones Engel,L.; McKenzie,P.; Krauss,S.; Webby,R.J.; Feeroz,M.M.; Webster,R.G.
EPI729799	PB2	China	2015-May-01	A/chicken/Shanghai/06/2015		Other Database Import	Ge,F.
EPI641382	PB2	China	2015-May-05	A/chicken/Shandong/1167/2015		Other Database Import	Tan,L.; Xu,C.T.; Zhao,X.; Huang,Q.; Huang,Y.; Zhu,F.; Gao,D.; Zhang,L.; Yang,S.; Zhang,X.
EPI753488	PB2	China	2015-May-14	A/chicken/Zhejiang/514132/2015		Other Database Import	Wu,H.; Lu,R.; Peng,X.; Cheng,L.; Jin,C.; Lu,X.; Xie,T.; Yao,H.; Wu,N.
EPI895221	PB2	China	2016-Feb-19	A/chicken/Taishun/TS2/2016		Other Database Import	Chen,L.J.; Tian,J.H.; Lin,X.D.; Liao,Y.; Shi,M.; Zhang,Y.Z.

## Sheet: PB1
Table S1. GISAID acknowledgements for PB1 segment.
Isolate ID	Segment	Country	Collection date	Isolate name	Originating Laboratory	Submitting Laboratory	Authors
EPI89465	PB1	China	1979	A/duck/Hong-Kong/784/1979		Other Database Import
EPI590167	PB1	Hong-Kong-(SAR)	1980	A/duck/Hong-Kong/819/1980		Other Database Import	Kida,H.; Sakoda,Y.; Okamatsu,M.; Matsuno,K.; Masani,K.; Hatamachi,J.
EPI590285	PB1	Hong-Kong-(SAR)	1980	A/duck/Hong-Kong/820/1980		Other Database Import	Kida,H.; Sakoda,Y.; Okamatsu,M.; Matsuno,K.; Masani,K.; Hatamachi,J.
EPI5781	PB1	China	1996	A/Goose/Guangdong/1/96		Other Database Import
EPI321	PB1	Japan	1997	A/parakeet/Chiba/1/97		Other Database Import
EPI82074	PB1	China	1999	A/chicken/Guangxi/9/99		Other Database Import
EPI82068	PB1	China	2001	A/chicken/Guangdong/56/01		Other Database Import
EPI1476	PB1	Japan	2001	A/chicken/Osaka/aq58/2001		Other Database Import
EPI236554	PB1	Hong-Kong-(SAR)	2001	A/Duck/Hong-Kong/380.5/2001		Other Database Import	Kim,L.M.; Scott,M.A.; Suarez,D.L.; Spackman,E.; Swayne,D.E.; Afonso,C.L.
EPI269116	PB1	China	2001	A/duck/Shantou/1197/2001		Other Database Import	Huang,K.; Bahl,J.; Fan,X.; Vijaykrishna,D.; Cheung,C.; Webby,R.J.; Webster,R.G.; Chen,H.; Smith,G.J.D.; Peiris,M.J.S.; Guan,Y.
EPI235803	PB1	China	2002	A/chicken/Jilin/hd/2002		Other Database Import	Liao,X.; Zhang,X.; Wang,J.; Yu,J.; Jin,N.
EPI102497	PB1	Taiwan	2002	A/chicken/Taiwan/0222/02		Other Database Import
EPI102513	PB1	Taiwan	2002	A/chicken/Taiwan/0408/02		Other Database Import
EPI102499	PB1	Taiwan	2002	A/chicken/Taiwan/PF1/02		Other Database Import
EPI102503	PB1	Taiwan	2002	A/chicken/Taiwan/PF3/02		Other Database Import
EPI1530	PB1	Japan	2002	A/chicken/Yokohama/aq134/2002		Other Database Import
EPI269068	PB1	China	2002	A/duck/Shantou/1706/2002		Other Database Import	Huang,K.; Bahl,J.; Fan,X.; Vijaykrishna,D.; Cheung,C.; Webby,R.J.; Webster,R.G.; Chen,H.; Smith,G.J.D.; Peiris,M.J.S.; Guan,Y.
EPI269066	PB1	China	2002	A/duck/Shantou/2061/2002		Other Database Import	Huang,K.; Bahl,J.; Fan,X.; Vijaykrishna,D.; Cheung,C.; Webby,R.J.; Webster,R.G.; Chen,H.; Smith,G.J.D.; Peiris,M.J.S.; Guan,Y.
EPI376196	PB1	China	2003-Apr-01	A/duck/Fujian/MH/2003		Other Database Import	Fu,G.; Huang,Y.
EPI184117	PB1	Pakistan	2003	A/chicken/Karachi/NARC-23/2003		Other Database Import	Abbas,M.A.; Spackman,E.; Ahmed,Z.; Naeem,K.; Siddique,N.; Swayne,D.; Sarmento,L.; Hameed,A.
EPI25022	PB1	China	2004	A/chicken/Guangdong/178/04		Other Database Import
EPI25007	PB1	China	2004	A/chicken/Guangdong/191/04		Other Database Import
EPI167093	PB1	Thailand	2004	A/chicken/Kohn-Kaen/NIAH330/2004		Other Database Import
EPI171051	PB1	Vietnam	2004	A/chicken/Vietnam/933/2004		Other Database Import
EPI269148	PB1	China	2004	A/duck/Hunan/3748/2004		Other Database Import	Huang,K.; Bahl,J.; Fan,X.; Vijaykrishna,D.; Cheung,C.; Webby,R.J.; Webster,R.G.; Chen,H.; Smith,G.J.D.; Peiris,M.J.S.; Guan,Y.
EPI107175	PB1	Thailand	2004	A/open-billed-stork/Nakhonsawan/BBD0104F/2004		Other Database Import
EPI170712	PB1	Vietnam	2005-Dec-06	A/duck/Vietnam/203/2005		Other Database Import
EPI170628	PB1	Vietnam	2005-Dec-16	A/duck/Vietnam/215/2005		Other Database Import
EPI170621	PB1	Vietnam	2005-Dec-18	A/chicken/Vietnam/216/2005		Other Database Import
EPI153739	PB1	Israel	2005	A/chicken/Israel/793/2005		Other Database Import
EPI227016	PB1	Vietnam	2005	A/chicken/Ninh-Binh/209/2005		Other Database Import	Kim,L.M.; Scott,M.A.; Suarez,D.L.; Spackman,E.; Swayne,D.E.; Afonso,C.L.
EPI275868	PB1	China	2005	A/chicken/Sichuan/81/2005		Other Database Import	Li,Y.; Shi,J.; Zhong,G.; Deng,G.; Tian,G.; Ge,J.; Zeng,X.; Song,J.; Zhao,D.; Liu,L.; Jiang,Y.; Guan,Y.; Bu,Z.; Chen,H.
EPI47328	PB1	Vietnam	2005	A/chicken/Viet-Nam/10/2005		Other Database Import
EPI47347	PB1	Vietnam	2005	A/chicken/Viet-Nam/11/2005		Other Database Import
EPI47309	PB1	Vietnam	2005	A/chicken/Viet-Nam/9/2005		Other Database Import
EPI269004	PB1	China	2005	A/duck/Fujian/629/2005		Other Database Import	Huang,K.; Bahl,J.; Fan,X.; Vijaykrishna,D.; Cheung,C.; Webby,R.J.; Webster,R.G.; Chen,H.; Smith,G.J.D.; Peiris,M.J.S.; Guan,Y.
EPI269012	PB1	China	2005	A/duck/Guangxi/141/2005		Other Database Import	Huang,K.; Bahl,J.; Fan,X.; Vijaykrishna,D.; Cheung,C.; Webby,R.J.; Webster,R.G.; Chen,H.; Smith,G.J.D.; Peiris,M.J.S.; Guan,Y.
EPI269029	PB1	China	2005	A/duck/Shantou/2472/2005		Other Database Import	Huang,K.; Bahl,J.; Fan,X.; Vijaykrishna,D.; Cheung,C.; Webby,R.J.; Webster,R.G.; Chen,H.; Smith,G.J.D.; Peiris,M.J.S.; Guan,Y.
EPI110788	PB1	Thailand	2005	A/open-billed-stork/Nakhonsawan/BBD2416F/05		Other Database Import
EPI167104	PB1	Thailand	2005	A/pigeon/Thailand/VSMU-13-KRI/2005		Other Database Import
EPI363517	PB1	China	2006-Feb-01	A/duck/Guizhou/1084/2006		Other Database Import	Huang,K.; Zhu,H.; Fan,X.; Wang,J.; Cheung,C.L.; Duan,L.; Hong,W.; Liu,Y.; Li,L.; Smith,D.K.; Chen,H.; Webster,R.G.; Webby,R.J.; Peiris,M.; Guan,Y.; Cheung,C. L.
EPI122615	PB1	China	2006	A/bird/Guangxi/H1/2006		Other Database Import
EPI47138	PB1	Afghanistan	2006	A/chicken/Afghanistan/1207/2006		Other Database Import
EPI58576	PB1	Afghanistan	2006	A/chicken/Afghanistan/1573-47/2006		Other Database Import
EPI58595	PB1	Afghanistan	2006	A/chicken/Afghanistan/1573-65/2006		Other Database Import
EPI60324	PB1	Afghanistan	2006	A/chicken/Afghanistan/1573-7/2006		Other Database Import
EPI275828	PB1	China	2006	A/chicken/Ningxia/24/2006		Other Database Import	Li,Y.; Shi,J.; Zhong,G.; Deng,G.; Tian,G.; Ge,J.; Zeng,X.; Song,J.; Zhao,D.; Liu,L.; Jiang,Y.; Guan,Y.; Bu,Z.; Chen,H.
EPI408089	PB1	Myanmar	2006	A/chicken/Pyigyitagon/204/2006		Other Database Import	Saito,T.; Watanabe,C.; Hayashi,T.; Uchida,Y.; Myint,W.W.; Thein,W.Z.; Takemae,N.; Mase,M.; Okamatsu,M.; Mar,A.; Mon,C.C.; Gawng,L.T.; Sann,K.; Kyi,T.A.; Yamaguchi,S.
EPI368254	PB1	Thailand	2006	A/duck/Thailand/TS01/2006		Other Database Import	Songserm,T.; Wiboon ut,S.; Kanchongkittiphon,W.; Na Ek,P.; Thitithanyanont,A.
EPI276076	PB1	China	2006	A/wild-duck/Liaoning/8/2006		Other Database Import	Li,Y.; Shi,J.; Zhong,G.; Deng,G.; Tian,G.; Ge,J.; Zeng,X.; Song,J.; Zhao,D.; Liu,L.; Jiang,Y.; Guan,Y.; Bu,Z.; Chen,H.
EPI363637	PB1	China	2006-Jul-01	A/duck/Shantou/14167/2006		Other Database Import	Huang,K.; Zhu,H.; Fan,X.; Wang,J.; Cheung,C.L.; Duan,L.; Hong,W.; Liu,Y.; Li,L.; Smith,D.K.; Chen,H.; Webster,R.G.; Webby,R.J.; Peiris,M.; Guan,Y.; Cheung,C. L.
EPI363453	PB1	China	2006-Mar-01	A/duck/Guangxi/1074/2006		Other Database Import	Huang,K.; Zhu,H.; Fan,X.; Wang,J.; Cheung,C.L.; Duan,L.; Hong,W.; Liu,Y.; Li,L.; Smith,D.K.; Chen,H.; Webster,R.G.; Webby,R.J.; Peiris,M.; Guan,Y.; Cheung,C. L.
EPI177760	PB1	Pakistan	2006-May-02	A/chicken/Pakistan/UDL-01/2006		Other Database Import
EPI365083	PB1	China	2006-Nov-01	A/duck/Fujian/10950/2006		Other Database Import	Huang,K.; Zhu,H.; Fan,X.; Wang,J.; Cheung,C.L.; Duan,L.; Hong,W.; Liu,Y.; Li,L.; Smith,D.K.; Chen,H.; Webster,R.G.; Webby,R.J.; Peiris,M.; Guan,Y.; Cheung,C. L.
EPI363849	PB1	China	2006-Sep-01	A/duck/Fujian/9062/2006		Other Database Import	Huang,K.; Zhu,H.; Fan,X.; Wang,J.; Cheung,C.L.; Duan,L.; Hong,W.; Liu,Y.; Li,L.; Smith,D.K.; Chen,H.; Webster,R.G.; Webby,R.J.; Peiris,M.; Guan,Y.; Cheung,C. L.
EPI365009	PB1	China	2007-Dec-01	A/duck/Fujian/7844/2007		Other Database Import	Huang,K.; Zhu,H.; Fan,X.; Wang,J.; Cheung,C.L.; Duan,L.; Hong,W.; Liu,Y.; Li,L.; Smith,D.K.; Chen,H.; Webster,R.G.; Webby,R.J.; Peiris,M.; Guan,Y.; Cheung,C. L.
EPI365017	PB1	China	2007-Dec-01	A/duck/Fujian/8349/2007		Other Database Import	Huang,K.; Zhu,H.; Fan,X.; Wang,J.; Cheung,C.L.; Duan,L.; Hong,W.; Liu,Y.; Li,L.; Smith,D.K.; Chen,H.; Webster,R.G.; Webby,R.J.; Peiris,M.; Guan,Y.; Cheung,C. L.
EPI180332	PB1	Israel	2007-Dec-02	A/chicken/Israel/951/2007		Other Database Import
EPI181563	PB1	Indonesia	2007	A/chicken/East-Java/UT6044/2007		Other Database Import
EPI164572	PB1	Lao,-People's-Democratic-Republic	2007	A/chicken/Laos/P0171/2007		Other Database Import
EPI285828	PB1	Vietnam	2007	A/duck/Soc-Trang/07-25/2007		Other Database Import	Kim,L.M.; Scott,M.A.; Suarez,D.L.; Spackman,E.; Swayne,D.E.; Afonso,C.L.
EPI622550	PB1	Vietnam	2007	A/duck/Vietnam-Hau-Giang/NCVD-12/2007		Other Database Import	Pantin Jackwood,M.J.; Spackman,E.; Suarez,D.L.; Wasilenko,J.; Sarmento,L.; Shepherd,E.; Smith,D.; Lee,S.; Lone,N.A.
EPI350630	PB1	Vietnam	2007	A/duck/Vietnam/NCVD-102/2007	National Centre of Veterinary Diagnostics	Centers for Disease Control and Prevention	Davis,Todd; Rivailler,Pierre; Nguyen,Tung
EPI350672	PB1	Vietnam	2007	A/duck/Vietnam/NCVD-118/2007	National Centre of Veterinary Diagnostics	Centers for Disease Control and Prevention	Davis,Todd; Rivailler,Pierre; Nguyen,Tung
EPI221607	PB1	Vietnam	2007	A/Muscovy-duck/Ca-Mau/07-04/2007		Other Database Import	Kim,L.M.; Scott,M.A.; Suarez,D.L.; Spackman,E.; Swayne,D.E.; Afonso,C.L.
EPI569527	PB1	China	2007-Jan-11	A/chicken/Jiangsu/01/2007		Other Database Import	Zhao,M.; Gu,X.; Chen,H.; Liu,Q.; Zhong,L.; Huang,J.; Gu,M.; Liu,X.
EPI364033	PB1	China	2007-Jul-01	A/duck/Shantou/1240/2007		Other Database Import	Huang,K.; Zhu,H.; Fan,X.; Wang,J.; Cheung,C.L.; Duan,L.; Hong,W.; Liu,Y.; Li,L.; Smith,D.K.; Chen,H.; Webster,R.G.; Webby,R.J.; Peiris,M.; Guan,Y.; Cheung,C. L.
EPI365111	PB1	China	2007-Jun-01	A/duck/Fujian/1879/2007		Other Database Import	Huang,K.; Zhu,H.; Fan,X.; Wang,J.; Cheung,C.L.; Duan,L.; Hong,W.; Liu,Y.; Li,L.; Smith,D.K.; Chen,H.; Webster,R.G.; Webby,R.J.; Peiris,M.; Guan,Y.; Cheung,C. L.
EPI364983	PB1	China	2007-Nov-01	A/duck/Fujian/6841/2007		Other Database Import	Huang,K.; Zhu,H.; Fan,X.; Wang,J.; Cheung,C.L.; Duan,L.; Hong,W.; Liu,Y.; Li,L.; Smith,D.K.; Chen,H.; Webster,R.G.; Webby,R.J.; Peiris,M.; Guan,Y.; Cheung,C. L.
EPI610321	PB1	China	2007-Nov-20	A/chicken/Guangxi/LF/2007		Other Database Import	Peng,Y.; Xie,Z.; Liu,J.; Pang,Y.; Xie,L.; Luo,S.; Fan,Q.
EPI364936	PB1	China	2007-Sep-01	A/duck/Fujian/4676/2007		Other Database Import	Huang,K.; Zhu,H.; Fan,X.; Wang,J.; Cheung,C.L.; Duan,L.; Hong,W.; Liu,Y.; Li,L.; Smith,D.K.; Chen,H.; Webster,R.G.; Webby,R.J.; Peiris,M.; Guan,Y.; Cheung,C. L.
EPI560120	PB1	China	2008-Apr-01	A/chicken/Anhui/1/2008		Other Database Import	Zhu,Y.
EPI350665	PB1	Vietnam	2008-Dec-01	A/duck/Vietnam/NCVD-140/2008	National Centre of Veterinary Diagnostics	Centers for Disease Control and Prevention	Davis,Todd; Rivailler,Pierre; Nguyen,Tung
EPI350749	PB1	Vietnam	2008-Dec-01	A/duck/Vietnam/NCVD-160/2008	National Centre of Veterinary Diagnostics	Centers for Disease Control and Prevention	Davis,Todd; Rivailler,Pierre; Nguyen,Tung
EPI610273	PB1	China	2008-Dec-12	A/chicken/Guangxi/DX/2008		Other Database Import	Peng,Y.; Xie,Z.; Liu,J.; Pang,Y.; Xie,L.; Luo,S.; Fan,Q.
EPI469375	PB1	China	2008	A/chicken/Hong-Kong/NT155/2008		Other Database Import	Lam,T.T.Y.; Wang,J.; Shen,Y.; Zhou,B.; Duan,L.; Cheung,C.L.; Ma,C.; Lycett,S.J.; Leung,C.Y.H.; Chen,X.; Li,L.; Hong,W.; Chai,Y.; Zhou,L.; Liang,H.; Ou,Z.; Liu,Y.; Farooqui,A.; Kelvin,D.J.; Poon,L.L.M.; Smith,D.K.; Pybus,O.G.; Leung,G.M.; Shu,Y.; Webster,R.G.; Webby,R.J.; Peiris,J.S.M.; Rambaut,A.; Zhu,H.; Guan,Y.
EPI349860	PB1	Vietnam	2008	A/chicken/Vietnam/NCVD-033/2008	National Centre of Veterinary Diagnostics	Centers for Disease Control and Prevention	Davis,Todd; Rivailler,Pierre; Nguyen,Tung
EPI350518	PB1	Vietnam	2008	A/duck/Vietnam/NCVD-009/2008	National Centre of Veterinary Diagnostics	Centers for Disease Control and Prevention	Davis,Todd; Rivailler,Pierre; Nguyen,Tung
EPI177792	PB1	Pakistan	2008-Jan-09	A/chicken/Pakistan/UDL-01/2008		Other Database Import
EPI349846	PB1	Vietnam	2008-May-01	A/chicken/Vietnam/NCVD-03/2008	National Centre of Veterinary Diagnostics	Centers for Disease Control and Prevention	Davis,Todd; Rivailler,Pierre; Nguyen,Tung
EPI299288	PB1	Japan	2008-Oct-08	A/avian/Japan/8KI0135/2008		Other Database Import	The NIAID Influenza Genome Sequencing Consortium
EPI1007372	PB1	China	2008-Oct-09	A/duck/Hubei/S4170/2008		Other Database Import	Wang,G.; Deng,G.; Shi,J.; Luo,W.; Zhang,G.; Zhang,Q.; Liu,L.; Jiang,Y.; Li,C.; Sriwilaijaroen,N.; Hiramatsu,H.; Suzuki,Y.; Kawaoka,Y.; Chen,H.
EPI540309	PB1	Bangladesh	2009-Dec-23	A/duck/Bangladesh/1574/2009	Institute of Epidemiology Disease Control and Research (IEDCR) & Bangladesh National Influenza Centre (NIC)	Centers for Disease Control and Prevention	Gerloff, Nancy; Simpson, Natosha; Davis, C. Todd
EPI350156	PB1	Vietnam	2009	A/chicken/Vietnam/NCVD-390/2009	National Centre of Veterinary Diagnostics	Centers for Disease Control and Prevention	Davis,Todd; Rivailler,Pierre; Nguyen,Tung
EPI469471	PB1	China	2009	A/duck/Jiangxi/8032/2009		Other Database Import	Lam,T.T.Y.; Wang,J.; Shen,Y.; Zhou,B.; Duan,L.; Cheung,C.L.; Ma,C.; Lycett,S.J.; Leung,C.Y.H.; Chen,X.; Li,L.; Hong,W.; Chai,Y.; Zhou,L.; Liang,H.; Ou,Z.; Liu,Y.; Farooqui,A.; Kelvin,D.J.; Poon,L.L.M.; Smith,D.K.; Pybus,O.G.; Leung,G.M.; Shu,Y.; Webster,R.G.; Webby,R.J.; Peiris,J.S.M.; Rambaut,A.; Zhu,H.; Guan,Y.
EPI350812	PB1	Vietnam	2009	A/duck/Vietnam/NCVD-364/2009	National Centre of Veterinary Diagnostics	Centers for Disease Control and Prevention	Davis,Todd; Rivailler,Pierre; Nguyen,Tung
EPI350819	PB1	Vietnam	2009	A/duck/Vietnam/NCVD-365/2009	National Centre of Veterinary Diagnostics	Centers for Disease Control and Prevention	Davis,Todd; Rivailler,Pierre; Nguyen,Tung
EPI350861	PB1	Vietnam	2009	A/duck/Vietnam/NCVD-368/2009	National Centre of Veterinary Diagnostics	Centers for Disease Control and Prevention	Davis,Todd; Rivailler,Pierre; Nguyen,Tung
EPI350875	PB1	Vietnam	2009	A/duck/Vietnam/NCVD-376/2009	National Centre of Veterinary Diagnostics	Centers for Disease Control and Prevention	Davis,Todd; Rivailler,Pierre; Nguyen,Tung
EPI351534	PB1	Vietnam	2009	A/muscovy-duck/Vietnam/NCVD-384/2009	National Centre of Veterinary Diagnostics	Centers for Disease Control and Prevention	Davis,Todd; Rivailler,Pierre; Nguyen,Tung
EPI345567	PB1	China	2009-Jun-01	A/duck/Eastern-China/10/2009		Other Database Import	Zhao,G.; Liu,X.
EPI500972	PB1	China	2009-Mar-05	A/Duck/Guangdong/S1663/2009	Harbin Veterinary Research Institute (CAAS)	Harbin Veterinary Research Institute (CAAS)	Wang, G.J.; Deng,G.H.; Shi, J.Z.; Luo, W.Y.; Zhang, G.Q.; Zhang, Q.Y.; Liu, L.L.; Jiang, Y.P.; Li, C.J.; Sriwilaijaroen, N.; Hiramatsu, H.; Suzuki, Y.; Kawaoka, Y.; Chen, H.L.
EPI471871	PB1	China	2009-Nov-14	A/duck/Guangxi/GXd-4/2009		Other Database Import	Xie,Z.; Zhou,C.; Peng,Y.; Liu,J.; Pang,Y.; Deng,X.; Xie,L.; Fan,Q.
EPI314010	PB1	China	2009-Sep-10	A/duck/Tibet/S2/2009		Other Database Import	Suolang,S.; Jin,M.
EPI350476	PB1	Vietnam	2010-Apr-01	A/chicken/Vietnam/NCVD-412/2010	National Centre of Veterinary Diagnostics	Centers for Disease Control and Prevention	Davis,Todd; Rivailler,Pierre; Nguyen,Tung
EPI1035777	PB1	China	2010-Apr-08	A/duck/Guangxi/058/2010		Other Database Import	Li,M.; Xie,Z.X.; Xie,L.J.; Deng,X.W.; Xie,Q.Z.; Liu,J.B.; Fan,Q.; Pang,Y.S.; Luo,S.S.
EPI618042	PB1	Georgia	2010-Apr-28	A/domestic-duck/Republic-of-Georgia/2/2010		Other Database Import	Wentworth,D.E.; Halpin,R.A.; Lin,X.; Simenauer,A.; Akopov,A.; Mohan,M.; Fedorova,N.; Tsitrin,T.; Puri,V.; Stockwell,T.; Amedeo,P.; Bishop,B.; Gupta,N.; Hoover,J.; Katzel,D.; Schobel,S.; Shrivastava,S.; Thovarai,V.; Bao,Y.; Sanders,R.; Zhdanov,S.; Kiryutin,B.; Lipman,D.J.; Tatusova,T.; Fouchier,R.A.M.
EPI501044	PB1	China	2010-Dec-10	A/Duck/Guangxi/S4111/2010	Harbin Veterinary Research Institute (CAAS)	Harbin Veterinary Research Institute (CAAS)	Wang, G.J.; Deng,G.H.; Shi, J.Z.; Luo, W.Y.; Zhang, G.Q.; Zhang, Q.Y.; Liu, L.L.; Jiang, Y.P.; Li, C.J.; Sriwilaijaroen, N.; Hiramatsu, H.; Suzuki, Y.; Kawaoka, Y.; Chen, H.L.
EPI501100	PB1	China	2010-Dec-10	A/Duck/Hunan/S4273/2010	Harbin Veterinary Research Institute (CAAS)	Harbin Veterinary Research Institute (CAAS)	Wang, G.J.; Deng,G.H.; Shi, J.Z.; Luo, W.Y.; Zhang, G.Q.; Zhang, Q.Y.; Liu, L.L.; Jiang, Y.P.; Li, C.J.; Sriwilaijaroen, N.; Hiramatsu, H.; Suzuki, Y.; Kawaoka, Y.; Chen, H.L.
EPI350171	PB1	Vietnam	2010-Feb-01	A/chicken/Vietnam/NCVD-395/2010	National Centre of Veterinary Diagnostics	Centers for Disease Control and Prevention	Davis,Todd; Rivailler,Pierre; Nguyen,Tung
EPI383178	PB1	China	2010-Feb-10	A/chicken/Jiangsu/k0402/2010		Other Database Import	Hu,J.; Zhao,K.; Liu,X.; Wang,X.; Chen,Z.
EPI469421	PB1	China	2010	A/duck/Fujian/6390/2010		Other Database Import	Lam,T.T.Y.; Wang,J.; Shen,Y.; Zhou,B.; Duan,L.; Cheung,C.L.; Ma,C.; Lycett,S.J.; Leung,C.Y.H.; Chen,X.; Li,L.; Hong,W.; Chai,Y.; Zhou,L.; Liang,H.; Ou,Z.; Liu,Y.; Farooqui,A.; Kelvin,D.J.; Poon,L.L.M.; Smith,D.K.; Pybus,O.G.; Leung,G.M.; Shu,Y.; Webster,R.G.; Webby,R.J.; Peiris,J.S.M.; Rambaut,A.; Zhu,H.; Guan,Y.
EPI448077	PB1	Bangladesh	2010-Jan-04	A/chicken/Bangladesh/1012/2010	Institute of Epidemiology Disease Control and Research (IEDCR) & Bangladesh National Influenza Centre (NIC)	Centers for Disease Control and Prevention	Gerloff, Nancy; Simpson, Natosha; Poh, Mee;Davis, Todd
EPI442007	PB1	China	2010-Jan-27	A/goose/Guangdong/k0103/2010		Other Database Import	Zhao,K.; Gu,M.; Zhong,L.; Duan,Z.; Zhang,Y.; Zhu,Y.; Zhao,G.; Zhao,M.; Chen,Z.; Hu,S.; Liu,W.; Liu,X.; Peng,D.
EPI341440	PB1	Cambodia	2010-Jan-28	A/chicken/Cambodia/TKCMB5T/2010		Other Database Import	Buchy,P.; Mardy,S.; San,S.
EPI503973	PB1	Korea,-Republic-of	2010-Mar-01	A/wild-duck/SH38-64/2010		Other Database Import	Lee,K. J.; Choi,J. G.; Kang,H. M.; Song,B. M.; Lee,E. K.; Lee,H. S.; Lee,Y. J.
EPI500860	PB1	China	2010-Mar-03	A/Chicken/Guangdong/S1312/2010	Harbin Veterinary Research Institute (CAAS)	Harbin Veterinary Research Institute (CAAS)	Wang, G.J.; Deng,G.H.; Shi, J.Z.; Luo, W.Y.; Zhang, G.Q.; Zhang, Q.Y.; Liu, L.L.; Jiang, Y.P.; Li, C.J.; Sriwilaijaroen, N.; Hiramatsu, H.; Suzuki, Y.; Kawaoka, Y.; Chen, H.L.
EPI1007172	PB1	China	2010-Mar-05	A/chicken/Guangdong/S1453/2010		Other Database Import	Wang,G.; Deng,G.; Shi,J.; Luo,W.; Zhang,G.; Zhang,Q.; Liu,L.; Jiang,Y.; Li,C.; Sriwilaijaroen,N.; Hiramatsu,H.; Suzuki,Y.; Kawaoka,Y.; Chen,H.
EPI401606	PB1	China	2010-May-08	A/duck/Guangxi/GXd-5/2010		Other Database Import	Xie,Z.; Xie,L.; Zhou,C.; Liu,J.; Pang,Y.; Deng,X.; Fan,Q.; Peng,Y.
EPI425558	PB1	Vietnam	2010-Nov-01	A/duck/Vietnam/NCVD-645/2010	National Centre of Veterinary Diagnostics	Centers for Disease Control and Prevention
EPI471879	PB1	China	2010-Nov-11	A/duck/Guangxi/GXd-6/2010		Other Database Import	Xie,Z.; Zhou,C.; Peng,Y.; Liu,J.; Pang,Y.; Deng,X.; Xie,L.; Fan,Q.
EPI348865	PB1	Vietnam	2010-Nov-16	A/duck/Vietnam/NCVD-456/2010	National Institute of Hygiene and Epidemiology	Centers for Disease Control and Prevention	Davis,Todd; Rivailler,Pierre; Nguyen,Tung
EPI540357	PB1	Bangladesh	2010-Oct-27	A/duck/Bangladesh/1766/2010	Institute of Epidemiology Disease Control and Research (IEDCR) & Bangladesh National Influenza Centre (NIC)	Centers for Disease Control and Prevention	Gerloff, Nancy; Simpson, Natosha; Davis, C. Todd
EPI424750	PB1	Vietnam	2010-Oct-29	A/duck/Vietnam/NCVD-784/2010	National Centre of Veterinary Diagnostics	Centers for Disease Control and Prevention
EPI540528	PB1	Bangladesh	2011-Apr-03	A/duck/Bangladesh/727/2011	Institute of Epidemiology Disease Control and Research (IEDCR) & Bangladesh National Influenza Centre (NIC)	Centers for Disease Control and Prevention	Gerloff, Nancy; Simpson, Natosha; Davis, C. Todd
EPI424902	PB1	Vietnam	2011-Aug-04	A/duck/Vietnam/NCVD-935/2011	National Centre of Veterinary Diagnostics	Centers for Disease Control and Prevention
EPI387933	PB1	Vietnam	2011-Dec-06	A/muscovy-duck/Vietnam/LBM66/2011		Other Database Import	Soda,K.; Hotta,K.; Nagai,Y.; Ito,T.; Mimura,W.
EPI401467	PB1	Japan	2011-Feb-01	A/chicken/Aichi/2/2011		Other Database Import	Uchida,Y.; Suzuki,Y.; Shirakura,M.; Kawaguchi,A.; Nobusawa,E.; Tanikawa,T.; Hikono,H.; Takemae,N.; Mase,M.; Kanehira,K.; Hayashi,T.; Tagawa,Y.; Tashiro,M.; Saito,T.
EPI401471	PB1	Japan	2011-Feb-01	A/chicken/Miyazaki/9/2011		Other Database Import	Uchida,Y.; Suzuki,Y.; Shirakura,M.; Kawaguchi,A.; Nobusawa,E.; Tanikawa,T.; Hikono,H.; Takemae,N.; Mase,M.; Kanehira,K.; Hayashi,T.; Tagawa,Y.; Tashiro,M.; Saito,T.
EPI401495	PB1	Japan	2011-Feb-01	A/chicken/Wakayama/1/2011		Other Database Import	Uchida,Y.; Suzuki,Y.; Shirakura,M.; Kawaguchi,A.; Nobusawa,E.; Tanikawa,T.; Hikono,H.; Takemae,N.; Mase,M.; Kanehira,K.; Hayashi,T.; Tagawa,Y.; Tashiro,M.; Saito,T.
EPI448165	PB1	Bangladesh	2011-Feb-07	A/crow/Bangladesh/316T/2011	Institute of Epidemiology Disease Control and Research (IEDCR) & Bangladesh National Influenza Centre (NIC)	Centers for Disease Control and Prevention	Gerloff, Nancy; Simpson, Natosha; Poh, Mee;Davis, Todd
EPI618043	PB1	Georgia	2011-Feb-11	A/mallard/Republic-of-Georgia/12/2011		Other Database Import	Wentworth,D.E.; Halpin,R.A.; Lin,X.; Simenauer,A.; Akopov,A.; Mohan,M.; Fedorova,N.; Tsitrin,T.; Puri,V.; Stockwell,T.; Amedeo,P.; Bishop,B.; Gupta,N.; Hoover,J.; Katzel,D.; Schobel,S.; Shrivastava,S.; Thovarai,V.; Bao,Y.; Sanders,R.; Zhdanov,S.; Kiryutin,B.; Lipman,D.J.; Tatusova,T.; Fouchier,R.A.M.
EPI469398	PB1	China	2011	A/common-teal/Hong-Kong/MPL1075/2011		Other Database Import	Lam,T.T.Y.; Wang,J.; Shen,Y.; Zhou,B.; Duan,L.; Cheung,C.L.; Ma,C.; Lycett,S.J.; Leung,C.Y.H.; Chen,X.; Li,L.; Hong,W.; Chai,Y.; Zhou,L.; Liang,H.; Ou,Z.; Liu,Y.; Farooqui,A.; Kelvin,D.J.; Poon,L.L.M.; Smith,D.K.; Pybus,O.G.; Leung,G.M.; Shu,Y.; Webster,R.G.; Webby,R.J.; Peiris,J.S.M.; Rambaut,A.; Zhu,H.; Guan,Y.
EPI425294	PB1	Vietnam	2011	A/duck/Vietnam/NCVD-669/2011	National Centre of Veterinary Diagnostics	Centers for Disease Control and Prevention
EPI448221	PB1	Bangladesh	2011-Jul-24	A/duck/Bangladesh/4124T/2011	Institute of Epidemiology Disease Control and Research (IEDCR) & Bangladesh National Influenza Centre (NIC)	Centers for Disease Control and Prevention	Gerloff, Nancy; Simpson, Natosha; Poh, Mee;Davis, Todd
EPI340436	PB1	China	2011-Jun-01	A/duck/Zhejiang/0611-15/2011		Other Database Import	Wu,H.; Wu,N.
EPI425518	PB1	Vietnam	2011-Jun-15	A/chicken/Vietnam/NCVD-780/2011	National Centre of Veterinary Diagnostics	Centers for Disease Control and Prevention
EPI401553	PB1	Japan	2011-Mar-01	A/chicken/Chiba/2/2011		Other Database Import	Uchida,Y.; Suzuki,Y.; Shirakura,M.; Kawaguchi,A.; Nobusawa,E.; Tanikawa,T.; Hikono,H.; Takemae,N.; Mase,M.; Kanehira,K.; Hayashi,T.; Tagawa,Y.; Tashiro,M.; Saito,T.
EPI351710	PB1	China	2011-Mar-01	A/chicken/Zhejiang/329/2011		Other Database Import	Wu,H.; Wu,N.
EPI448101	PB1	Bangladesh	2011-Mar-20	A/duck/Bangladesh/1849/2011	Institute of Epidemiology Disease Control and Research (IEDCR) & Bangladesh National Influenza Centre (NIC)	Centers for Disease Control and Prevention	Gerloff, Nancy; Simpson, Natosha; Poh, Mee;Davis, Todd
EPI466312	PB1	China	2011-May-21	A/chicken/Jiangsu/ZJDT/2011	Yangzhou University	Chinese Academy of Sciences	Daxin, P
EPI383207	PB1	China	2011-Nov-29	A/chicken/Guangdong/C273/2011		Other Database Import	Jiao,P.; Yuan,R.; Wei,L.; Jia,B.; Cao,L.; Song,Y.; Gong,L.; Xu,C.; Ren,T.; Liao,M.
EPI574299	PB1	Vietnam	2011-Oct-12	A/muscovy-duck/Vietnam/LBM21/2011		Other Database Import	Soda,K.; Hotta,K.; Trang,H.U.; Le,Q.M.; Yamashiro,T.; Ito,T.; Trang,U.H.
EPI469309	PB1	China	2011-Sep-01	A/chicken/Hong-Kong/YU158/2011		Other Database Import	Lam,T.T.Y.; Wang,J.; Shen,Y.; Zhou,B.; Duan,L.; Cheung,C.L.; Ma,C.; Lycett,S.J.; Leung,C.Y.H.; Chen,X.; Li,L.; Hong,W.; Chai,Y.; Zhou,L.; Liang,H.; Ou,Z.; Liu,Y.; Farooqui,A.; Kelvin,D.J.; Poon,L.L.M.; Smith,D.K.; Pybus,O.G.; Leung,G.M.; Shu,Y.; Webster,R.G.; Webby,R.J.; Peiris,J.S.M.; Rambaut,A.; Zhu,H.; Guan,Y.
EPI703550	PB1	China	2012-Dec-04	A/goose/Eastern-China/L1204/2012		Other Database Import	Sun,H.; Sun,Y.; Pu,J.; Liu,L.; Li,C.; Xu,G.; Qin,M.; Zhang,Y.; Zhao,H.; Wei,K.; Liu,J.
EPI540501	PB1	Bangladesh	2012-Dec-15	A/poultry/Bangladesh/91354/2012	Institute of Epidemiology Disease Control and Research (IEDCR) & Bangladesh National Influenza Centre (NIC)	Centers for Disease Control and Prevention	Gerloff, Nancy; Simpson, Natosha; Davis, C. Todd
EPI510859	PB1	Taiwan	2012-Dec-25	A/chicken/Taiwan/2437/2012		Other Database Import	Lee,C.C.; Zhu,H.; Huang,P.Y.; Peng,L.; Chang,Y.C.; Yip,C.H.; Li,Y.T.; Cheung,C.L.; Compans,R.; Yang,C.; Smith,D.K.; Lam,T.T.; King,C.C.; Guan,Y.; Lam,T.T.Y.
EPI812446	PB1	Bhutan	2012-Feb-14	A/chicken/Bhutan/259/2012		Other Database Import	Franks,J.S.; Tenzin,S.; Tshering,D.; Rai,P.; Lhamo,K.; Dahal,N.; Dukpa,K.
EPI425390	PB1	Vietnam	2012-Feb-16	A/duck/Vietnam/NCVD-1253/2012	National Centre of Veterinary Diagnostics	Centers for Disease Control and Prevention
EPI469332	PB1	China	2012	A/chicken/Hong-Kong/YU150W/2012		Other Database Import	Lam,T.T.Y.; Wang,J.; Shen,Y.; Zhou,B.; Duan,L.; Cheung,C.L.; Ma,C.; Lycett,S.J.; Leung,C.Y.H.; Chen,X.; Li,L.; Hong,W.; Chai,Y.; Zhou,L.; Liang,H.; Ou,Z.; Liu,Y.; Farooqui,A.; Kelvin,D.J.; Poon,L.L.M.; Smith,D.K.; Pybus,O.G.; Leung,G.M.; Shu,Y.; Webster,R.G.; Webby,R.J.; Peiris,J.S.M.; Rambaut,A.; Zhu,H.; Guan,Y.
EPI469234	PB1	China	2012	A/chicken/Hong-Kong/YU262W/2012		Other Database Import	Lam,T.T.Y.; Wang,J.; Shen,Y.; Zhou,B.; Duan,L.; Cheung,C.L.; Ma,C.; Lycett,S.J.; Leung,C.Y.H.; Chen,X.; Li,L.; Hong,W.; Chai,Y.; Zhou,L.; Liang,H.; Ou,Z.; Liu,Y.; Farooqui,A.; Kelvin,D.J.; Poon,L.L.M.; Smith,D.K.; Pybus,O.G.; Leung,G.M.; Shu,Y.; Webster,R.G.; Webby,R.J.; Peiris,J.S.M.; Rambaut,A.; Zhu,H.; Guan,Y.
EPI585426	PB1	India	2012-Jan-04	A/chicken/India/01CA06/2012		Other Database Import	Nagarajan,S.; Syed,Z.; Tosh,C.; Murugkar,H.V.; Kumar,M.; Kulkarni,D.D.
EPI572903	PB1	China	2012-Jul-03	A/chicken/Shanxi/0703/2012		Other Database Import	Pu,J.; Wang,S.; Yin,Y.; Zhang,G.; Carter,R.A.; Wang,J.; Xu,G.; Sun,H.; Wang,M.; Wen,C.; Wei,Y.; Wang,D.; Zhu,B.; Lemmon,G.; Jiao,Y.; Duan,S.; Wang,Q.; Du,Q.; Sun,M.; Bao,J.; Sun,Y.; Zhao,J.; Zhang,H.; Wu,G.; Liu,J.; Webster,R.G.; Lv,N.
EPI461027	PB1	Vietnam	2012-Jul-28	A/duck/Vietnam/QB1207/2012		Other Database Import	Bui,V.N.; Dao,T.D.; Nguyen,L.T.; Nguyen,T.N.T.; Bui,A.N.; Trinh,D.Q.; Inui,K.; Runstadler,J.; Ogawa,H.; Nguyen,K.V.; Imai,K.; Nguyen,T.T.H.
EPI692542	PB1	China	2012-Jun-05	A/duck/Jiangxi/S21055/2012		Other Database Import	Liang,L.; Deng,G.; Shi,J.; Wang,S.; Zhang,Q.; Kong,H.; Gu,C.; Guan,Y.; Suzuki,Y.; Li,Y.; Jiang,Y.; Tian,G.; Liu,L.; Li,C.; Chen,H.
EPI466384	PB1	China	2012-Mar-24	A/chicken/Jiangsu/CZYWP/2012	Yangzhou University	Chinese Academy of Sciences	Daxin, P
EPI440908	PB1	China	2012-Nov-17	A/chicken/Shaanxi/11/2012		Other Database Import	Ren,J.; Wang,J.
EPI540493	PB1	Bangladesh	2012-Nov-29	A/avian/Bangladesh/91286/2012	Institute of Epidemiology Disease Control and Research (IEDCR) & Bangladesh National Influenza Centre (NIC)	Centers for Disease Control and Prevention	Gerloff, Nancy; Simpson, Natosha; Davis, C. Todd
EPI533886	PB1	China	2012-Sep-07	A/duck/Guangxi/125D17/2012		Other Database Import	Wu,A.Q.; Xie,Z.X.; Xie,L.J.; Xie,Q.Z.; Luo,S.S.; Liu,J.B.; Deng,X.W.; Fan,Q.; Pang,Y.S.
EPI532272	PB1	China	2013-Apr-01	A/chicken/Zhejiang/C481/2013		Other Database Import	Wu,H.; Wu,N.; Guo,C.; Li,L.
EPI649194	PB1	China	2013-Apr-01	A/duck/Zhejiang/413/2013		Other Database Import	Wu,H.; Peng,X.; Cheng,L.; Lu,X.; Jin,C.; Xie,T.; Yao,H.; Wu,N.
EPI680683	PB1	China	2013-Apr-08	A/pigeon/Zhejiang/P5/2013		Other Database Import	Wu,H.; Peng,X.; Cheng,L.; Lu,X.; Jin,C.; Xie,T.; Yao,H.; Wu,N.
EPI589827	PB1	Vietnam	2013-Apr-13	A/muscovy-duck/Quang-Ninh/7c121/2013		Other Database Import	Soda,K.; Hotta,K.; Trang,H.U.; Le,Q.M.; Yamashiro,T.; Ito,T.
EPI457851	PB1	China	2013-Apr-16	A/chicken/Jiangsu/SC537/2013	Harbin Veterinary Research Institute (CAAS)	Harbin Veterinary Research Institute (CAAS)	Zhang, Q.; Shi, J.; Deng, G.; Guo, J.; Zeng, X.; He, X.; Kong, H.; Gu, C.; Li, X.; Liu, J.; Wang, G.; Chen, Y.; Liu, L.; Liang, L.; Li, Y.; Fan, J.; Wang, J.; Li, W.; Guan, L.; Li, Q.; Yang, H.; Chen, P.; Jiang, L.; Guan, Y.; Xin, X.; Jiang, Y.; Tian, G.; Wang, X.; Qiao, C.; Li, C.; Bu, Z.; Chen, H.
EPI544890	PB1	China	2013-Apr-25	A/duck/Shandong/Q1/2013		Other Database Import	Li,Q.
EPI544793	PB1	China	2013-Apr-26	A/duck/Shanghai/SH3/2013		Other Database Import	Yang,D.; Liu,J.; Ju,H.; Ge,F.; Wang,J.; Li,X.; Liu,P.; Zhou,J.
EPI775055	PB1	Vietnam	2013-Aug-13	A/chicken/DongNai/0182/2013		Other Database Import	Cao,B.V.; Le Ha,T.D.; Mai,V.N.; Dang Trinh,M.A.; Le Phan,K.N.; Vo Tran,N.T.; Hoang,T.
EPI591585	PB1	China	2013-Aug-25	A/duck/Jiangxi/20189/2013		Other Database Import	Lam,T.Y.; Zhou,B.; Wang,J.; Chai,Y.; Shen,Y.; Chen,X.; Ma,C.; Hong,W.; Chen,Y.; Zhang,Y.; Duan,L.; Chen,P.; Jiang,J.; Li,L.; Poon,L.M.; Webby,R.J.; Smith,D.K.; Leung,G.M.; Peiris,J.M.; Holmes,E.C.; Guan,Y.; Zhu,H.
EPI599748	PB1	China	2013-Dec-08	A/chicken/Jiangxi/31856/2013		Other Database Import	Ma,C.; Lam,T.T.Y.; Chai,Y.; Wang,J.; Fan,X.; Hong,W.; Zhang,Y.; Li,L.; Liu,Y.; Smith,D.K.; Webby,R.J.; Peiris,J.S.M.; Zhu,H.; Guan,Y.
EPI583423	PB1	China	2013-Dec-11	A/chicken/Shenzhen/1098/2013		Other Database Import	Lam,T.Y.; Zhou,B.; Wang,J.; Chai,Y.; Shen,Y.; Chen,X.; Ma,C.; Hong,W.; Chen,Y.; Zhang,Y.; Duan,L.; Chen,P.; Jiang,J.; Li,L.; Poon,L.M.; Webby,R.J.; Smith,D.K.; Leung,G.M.; Peiris,J.M.; Holmes,E.C.; Guan,Y.; Zhu,H.
EPI583501	PB1	China	2013-Dec-12	A/chicken/Shenzhen/1799/2013		Other Database Import	Lam,T.Y.; Zhou,B.; Wang,J.; Chai,Y.; Shen,Y.; Chen,X.; Ma,C.; Hong,W.; Chen,Y.; Zhang,Y.; Duan,L.; Chen,P.; Jiang,J.; Li,L.; Poon,L.M.; Webby,R.J.; Smith,D.K.; Leung,G.M.; Peiris,J.M.; Holmes,E.C.; Guan,Y.; Zhu,H.
EPI602446	PB1	China	2013-Dec-15	A/duck/Jiangxi/33665/2013		Other Database Import	Ma,C.; Lam,T.T.Y.; Chai,Y.; Wang,J.; Fan,X.; Hong,W.; Zhang,Y.; Li,L.; Liu,Y.; Smith,D.K.; Webby,R.J.; Peiris,J.S.M.; Zhu,H.; Guan,Y.
EPI602380	PB1	China	2013-Dec-15	A/duck/Jiangxi/33713/2013		Other Database Import	Ma,C.; Lam,T.T.Y.; Chai,Y.; Wang,J.; Fan,X.; Hong,W.; Zhang,Y.; Li,L.; Liu,Y.; Smith,D.K.; Webby,R.J.; Peiris,J.S.M.; Zhu,H.; Guan,Y.
EPI599878	PB1	China	2013-Dec-15	A/duck/Jiangxi/33779/2013		Other Database Import	Ma,C.; Lam,T.T.Y.; Chai,Y.; Wang,J.; Fan,X.; Hong,W.; Zhang,Y.; Li,L.; Liu,Y.; Smith,D.K.; Webby,R.J.; Peiris,J.S.M.; Zhu,H.; Guan,Y.
EPI600171	PB1	China	2013-Dec-15	A/migratory-duck/Jiangxi/33195/2013		Other Database Import	Ma,C.; Lam,T.T.Y.; Chai,Y.; Wang,J.; Fan,X.; Hong,W.; Zhang,Y.; Li,L.; Liu,Y.; Smith,D.K.; Webby,R.J.; Peiris,J.S.M.; Zhu,H.; Guan,Y.
EPI583585	PB1	China	2013-Dec-18	A/chicken/Dongguan/2754/2013		Other Database Import	Lam,T.Y.; Zhou,B.; Wang,J.; Chai,Y.; Shen,Y.; Chen,X.; Ma,C.; Hong,W.; Chen,Y.; Zhang,Y.; Duan,L.; Chen,P.; Jiang,J.; Li,L.; Poon,L.M.; Webby,R.J.; Smith,D.K.; Leung,G.M.; Peiris,J.M.; Holmes,E.C.; Guan,Y.; Zhu,H.
EPI581685	PB1	China	2013-Dec-18	A/silkie-chicken/Dongguan/3284/2013		Other Database Import	Lam,T.Y.; Zhou,B.; Wang,J.; Chai,Y.; Shen,Y.; Chen,X.; Ma,C.; Hong,W.; Chen,Y.; Zhang,Y.; Duan,L.; Chen,P.; Jiang,J.; Li,L.; Poon,L.M.; Webby,R.J.; Smith,D.K.; Leung,G.M.; Peiris,J.M.; Holmes,E.C.; Guan,Y.; Zhu,H.
EPI583655	PB1	China	2013-Dec-19	A/chicken/Dongguan/3409/2013		Other Database Import	Lam,T.Y.; Zhou,B.; Wang,J.; Chai,Y.; Shen,Y.; Chen,X.; Ma,C.; Hong,W.; Chen,Y.; Zhang,Y.; Duan,L.; Chen,P.; Jiang,J.; Li,L.; Poon,L.M.; Webby,R.J.; Smith,D.K.; Leung,G.M.; Peiris,J.M.; Holmes,E.C.; Guan,Y.; Zhu,H.
EPI581892	PB1	China	2013-Dec-19	A/chicken/Dongguan/3935/2013		Other Database Import	Lam,T.Y.; Zhou,B.; Wang,J.; Chai,Y.; Shen,Y.; Chen,X.; Ma,C.; Hong,W.; Chen,Y.; Zhang,Y.; Duan,L.; Chen,P.; Jiang,J.; Li,L.; Poon,L.M.; Webby,R.J.; Smith,D.K.; Leung,G.M.; Peiris,J.M.; Holmes,E.C.; Guan,Y.; Zhu,H.
EPI601853	PB1	China	2013-Dec-29	A/chicken/Jiangxi/36223/2013		Other Database Import	Ma,C.; Lam,T.T.Y.; Chai,Y.; Wang,J.; Fan,X.; Hong,W.; Zhang,Y.; Li,L.; Liu,Y.; Smith,D.K.; Webby,R.J.; Peiris,J.S.M.; Zhu,H.; Guan,Y.
EPI837997	PB1	China	2013	A/chicken/Sichuan/SIC8/2013		Other Database Import	Liu,Y.; Lai,H.; Li,L.; Chen,R.
EPI469257	PB1	China	2013	A/chicken/Wenzhou/640/2013		Other Database Import	Lam,T.T.Y.; Wang,J.; Shen,Y.; Zhou,B.; Duan,L.; Cheung,C.L.; Ma,C.; Lycett,S.J.; Leung,C.Y.H.; Chen,X.; Li,L.; Hong,W.; Chai,Y.; Zhou,L.; Liang,H.; Ou,Z.; Liu,Y.; Farooqui,A.; Kelvin,D.J.; Poon,L.L.M.; Smith,D.K.; Pybus,O.G.; Leung,G.M.; Shu,Y.; Webster,R.G.; Webby,R.J.; Peiris,J.S.M.; Rambaut,A.; Zhu,H.; Guan,Y.
EPI898651	PB1	Vietnam	2013-Jan-09	A/chicken/Vietnam/NCVD-2693/2013		Other Database Import	Davis,T.; Jang,Y.
EPI510796	PB1	Taiwan	2013-Jan-10	A/duck/Taiwan/4376/2013		Other Database Import	Lee,C.C.; Zhu,H.; Huang,P.Y.; Peng,L.; Chang,Y.C.; Yip,C.H.; Li,Y.T.; Cheung,C.L.; Compans,R.; Yang,C.; Smith,D.K.; Lam,T.T.; King,C.C.; Guan,Y.; Lam,T.T.Y.
EPI466456	PB1	China	2013-Jan-23	A/chicken/Jiangsu/ZJ4/2013	Yangzhou University	Chinese Academy of Sciences	Daxin, P
EPI1060988	PB1	China	2013-Jul-07	A/duck/Zhejiang/7731/2013		Other Database Import	Wu,H.; Lu,R.; Peng,X.; Liu,F.; Cheng,L.; Wu,N.
EPI598950	PB1	China	2013-Jul-10	A/duck/Wuxi/2/2013		Other Database Import	Ma,M.J.; Yang,X.X.; Qian,Y.H.; Zhao,S.Y.; Hua,S.; Wang,T.C.; Chen,S.H.; Ma,G.Y.; Sang,X.Y.; Liu,L.N.; Wu,A.P.; Jiang,T.J.; Gao,Y.W.; Gray,G.C.; Zhao,T.; Ling,X.; Wang,J.L.; Lu,B.; Qian,J.; Cao,W.C.; Ma,M. J.; Yang,X. X.; Cao,W. C.
EPI1060991	PB1	China	2013-Jul-17	A/duck/Zhejiang/71731/2013		Other Database Import	Wu,H.; Lu,R.; Peng,X.; Liu,F.; Cheng,L.; Wu,N.
EPI1060992	PB1	China	2013-Jul-17	A/duck/Zhejiang/71737/2013		Other Database Import	Wu,H.; Lu,R.; Peng,X.; Liu,F.; Cheng,L.; Wu,N.
EPI600053	PB1	China	2013-Jul-21	A/chicken/Jiangxi/17403/2013		Other Database Import	Ma,C.; Lam,T.T.Y.; Chai,Y.; Wang,J.; Fan,X.; Hong,W.; Zhang,Y.; Li,L.; Liu,Y.; Smith,D.K.; Webby,R.J.; Peiris,J.S.M.; Zhu,H.; Guan,Y.
EPI471171	PB1	Vietnam	2013-Jun-05	A/muscovy-duck/Vietnam/LBM436/2013		Other Database Import	Nakamura,Y.; Soda,K.; Hotta,K.; Lee,M.Q.; Ito,T.
EPI572920	PB1	China	2013-Mar-07	A/chicken/Shandong/qd0307/2013		Other Database Import	Pu,J.; Wang,S.; Yin,Y.; Zhang,G.; Carter,R.A.; Wang,J.; Xu,G.; Sun,H.; Wang,M.; Wen,C.; Wei,Y.; Wang,D.; Zhu,B.; Lemmon,G.; Jiao,Y.; Duan,S.; Wang,Q.; Du,Q.; Sun,M.; Bao,J.; Sun,Y.; Zhao,J.; Zhang,H.; Wu,G.; Liu,J.; Webster,R.G.; Lv,N.
EPI530981	PB1	China	2013-Nov-14	A/duck/Zhejiang/W24/2013		Other Database Import	Wu,H.; Peng,X.; Xu,L.; Jin,C.; Cheng,L.; Lu,X.; Xie,T.; Yao,H.; Wu,N.
EPI680707	PB1	China	2013-Oct-16	A/chicken/Zhejiang/C46/2013		Other Database Import	Wu,H.; Peng,X.; Cheng,L.; Lu,X.; Jin,C.; Xie,T.; Yao,H.; Wu,N.
EPI534814	PB1	China	2013-Oct-16	A/duck/Zhejiang/D16/2013		Other Database Import	Wu,H.; Wu,N.; Peng,X.; Jin,C.; Lu,X.; Cheng,L.; Yao,H.; Li,L.
EPI594480	PB1	China	2013-Oct-20	A/chicken/Shaoxing/2414/2013		Other Database Import	Lam,T.Y.; Zhou,B.; Wang,J.; Chai,Y.; Shen,Y.; Chen,X.; Ma,C.; Hong,W.; Chen,Y.; Zhang,Y.; Duan,L.; Chen,P.; Jiang,J.; Li,L.; Poon,L.M.; Webby,R.J.; Smith,D.K.; Leung,G.M.; Peiris,J.M.; Holmes,E.C.; Guan,Y.; Zhu,H.
EPI596711	PB1	China	2013-Oct-23	A/chicken/Wenzhou/3330/2013		Other Database Import	Lam,T.Y.; Zhou,B.; Wang,J.; Chai,Y.; Shen,Y.; Chen,X.; Ma,C.; Hong,W.; Chen,Y.; Zhang,Y.; Duan,L.; Chen,P.; Jiang,J.; Li,L.; Poon,L.M.; Webby,R.J.; Smith,D.K.; Leung,G.M.; Peiris,J.M.; Holmes,E.C.; Guan,Y.; Zhu,H.
EPI582353	PB1	China	2013-Oct-24	A/chicken/Huzhou/3791/2013		Other Database Import	Lam,T.Y.; Zhou,B.; Wang,J.; Chai,Y.; Shen,Y.; Chen,X.; Ma,C.; Hong,W.; Chen,Y.; Zhang,Y.; Duan,L.; Chen,P.; Jiang,J.; Li,L.; Poon,L.M.; Webby,R.J.; Smith,D.K.; Leung,G.M.; Peiris,J.M.; Holmes,E.C.; Guan,Y.; Zhu,H.
EPI582982	PB1	China	2013-Oct-24	A/chicken/Huzhou/4076/2013		Other Database Import	Lam,T.Y.; Zhou,B.; Wang,J.; Chai,Y.; Shen,Y.; Chen,X.; Ma,C.; Hong,W.; Chen,Y.; Zhang,Y.; Duan,L.; Chen,P.; Jiang,J.; Li,L.; Poon,L.M.; Webby,R.J.; Smith,D.K.; Leung,G.M.; Peiris,J.M.; Holmes,E.C.; Guan,Y.; Zhu,H.
EPI592016	PB1	China	2013-Oct-29	A/chicken/Shaoxing/5493/2013		Other Database Import	Lam,T.Y.; Zhou,B.; Wang,J.; Chai,Y.; Shen,Y.; Chen,X.; Ma,C.; Hong,W.; Chen,Y.; Zhang,Y.; Duan,L.; Chen,P.; Jiang,J.; Li,L.; Poon,L.M.; Webby,R.J.; Smith,D.K.; Leung,G.M.; Peiris,J.M.; Holmes,E.C.; Guan,Y.; Zhu,H.
EPI592490	PB1	China	2014-Apr-06	A/chicken/Jiangxi/13515/2014		Other Database Import	Lam,T.Y.; Zhou,B.; Wang,J.; Chai,Y.; Shen,Y.; Chen,X.; Ma,C.; Hong,W.; Chen,Y.; Zhang,Y.; Duan,L.; Chen,P.; Jiang,J.; Li,L.; Poon,L.M.; Webby,R.J.; Smith,D.K.; Leung,G.M.; Peiris,J.M.; Holmes,E.C.; Guan,Y.; Zhu,H.
EPI592576	PB1	China	2014-Apr-06	A/chicken/Jiangxi/13543/2014		Other Database Import	Lam,T.Y.; Zhou,B.; Wang,J.; Chai,Y.; Shen,Y.; Chen,X.; Ma,C.; Hong,W.; Chen,Y.; Zhang,Y.; Duan,L.; Chen,P.; Jiang,J.; Li,L.; Poon,L.M.; Webby,R.J.; Smith,D.K.; Leung,G.M.; Peiris,J.M.; Holmes,E.C.; Guan,Y.; Zhu,H.
EPI1035967	PB1	China	2014-Apr-14	A/pigeon/Guangxi/164/2014		Other Database Import	Li,M.; Xie,Z.X.; Xie,L.J.; Deng,X.W.; Xie,Q.Z.; Liu,J.B.; Fan,Q.; Pang,Y.S.; Luo,S.S.
EPI593229	PB1	China	2014-Apr-16	A/chicken/Shantou/2556/2014		Other Database Import	Lam,T.Y.; Zhou,B.; Wang,J.; Chai,Y.; Shen,Y.; Chen,X.; Ma,C.; Hong,W.; Chen,Y.; Zhang,Y.; Duan,L.; Chen,P.; Jiang,J.; Li,L.; Poon,L.M.; Webby,R.J.; Smith,D.K.; Leung,G.M.; Peiris,J.M.; Holmes,E.C.; Guan,Y.; Zhu,H.
EPI593236	PB1	China	2014-Apr-16	A/chicken/Shantou/2562/2014		Other Database Import	Lam,T.Y.; Zhou,B.; Wang,J.; Chai,Y.; Shen,Y.; Chen,X.; Ma,C.; Hong,W.; Chen,Y.; Zhang,Y.; Duan,L.; Chen,P.; Jiang,J.; Li,L.; Poon,L.M.; Webby,R.J.; Smith,D.K.; Leung,G.M.; Peiris,J.M.; Holmes,E.C.; Guan,Y.; Zhu,H.
EPI592644	PB1	China	2014-Apr-20	A/chicken/Jiangxi/14479/2014		Other Database Import	Lam,T.Y.; Zhou,B.; Wang,J.; Chai,Y.; Shen,Y.; Chen,X.; Ma,C.; Hong,W.; Chen,Y.; Zhang,Y.; Duan,L.; Chen,P.; Jiang,J.; Li,L.; Poon,L.M.; Webby,R.J.; Smith,D.K.; Leung,G.M.; Peiris,J.M.; Holmes,E.C.; Guan,Y.; Zhu,H.
EPI683137	PB1	China	2014-Dec-01	A/turtledove/Wuhan/WHBJ12/2014		Other Database Import	Chen,L. J.; Lin,X. D.; Guo,W. P.; Tian,J. H.; Zhang,Y. Z.
EPI969333	PB1	Korea,-Republic-of	2014-Dec-02	A/wild-bird/Korea/SK14/2014		Other Database Import	Koo,B. S.; Yoon,S. W.
EPI845900	PB1	Japan	2014-Dec-19	A/mandarin-duck/Gifu/2112D001/2014		Other Database Import	Usui,T.; Soda,K.; Tomioka,Y.; Okamura,M.; Ishihara,T.; Yano,M.; Yabuta,T.; Takakuwa,H.; Otsuki,K.; Ito,H.; Ito,T.; Yamaguchi,T.
EPI895328	PB1	China	2014-Dec-22	A/Anser-fabalis/China/Anhui/L180/2014		Other Database Import	Ye,G.; Liang,C.H.; Ping,H.Y.; Hua,D.G.; Cheng,Y.Q.
EPI895344	PB1	China	2014-Dec-22	A/Anser-fabalis/China/Anhui/L256/2014		Other Database Import	Ye,G.; Liang,C.H.; Ping,H.Y.; Hua,D.G.; Cheng,Y.Q.
EPI561673	PB1	Korea,-Republic-of	2014-Feb-01	A/bean-goose/Korea/H328/2014		Other Database Import	Jeong,J.; Kang,H.M.; Lee,E.K.; Song,B.M.; Kwon,Y.K.; Kim,H.R.; Choi,K.S.; Kim,J.Y.; Lee,H.J.; Moon,O.K.; Jeong,W.; Choi,J.; Baek,J.H.; Joo,Y.S.; Park,Y.H.; Lee,H.S.; Lee,Y.J.; Lee,Y. J.; Kang,H. M.; Lee,E. K.; Song,B. M.; Lee,K. J.; Hong,M. S.
EPI703554	PB1	China	2014-Feb-15	A/duck/Eastern-China/S0215/2014		Other Database Import	Sun,H.; Sun,Y.; Pu,J.; Liu,L.; Li,C.; Xu,G.; Qin,M.; Zhang,Y.; Zhao,H.; Wei,K.; Liu,J.
EPI594275	PB1	China	2014-Feb-18	A/chicken/Jiangxi/10953/2014		Other Database Import	Lam,T.Y.; Zhou,B.; Wang,J.; Chai,Y.; Shen,Y.; Chen,X.; Ma,C.; Hong,W.; Chen,Y.; Zhang,Y.; Duan,L.; Chen,P.; Jiang,J.; Li,L.; Poon,L.M.; Webby,R.J.; Smith,D.K.; Leung,G.M.; Peiris,J.M.; Holmes,E.C.; Guan,Y.; Zhu,H.
EPI594324	PB1	China	2014-Feb-18	A/chicken/Jiangxi/10961/2014		Other Database Import	Lam,T.Y.; Zhou,B.; Wang,J.; Chai,Y.; Shen,Y.; Chen,X.; Ma,C.; Hong,W.; Chen,Y.; Zhang,Y.; Duan,L.; Chen,P.; Jiang,J.; Li,L.; Poon,L.M.; Webby,R.J.; Smith,D.K.; Leung,G.M.; Peiris,J.M.; Holmes,E.C.; Guan,Y.; Zhu,H.
EPI597271	PB1	China	2014-Feb-20	A/chicken/Dongguan/749/2014		Other Database Import	Lam,T.Y.; Zhou,B.; Wang,J.; Chai,Y.; Shen,Y.; Chen,X.; Ma,C.; Hong,W.; Chen,Y.; Zhang,Y.; Duan,L.; Chen,P.; Jiang,J.; Li,L.; Poon,L.M.; Webby,R.J.; Smith,D.K.; Leung,G.M.; Peiris,J.M.; Holmes,E.C.; Guan,Y.; Zhu,H.
EPI597323	PB1	China	2014-Feb-20	A/chicken/Dongguan/836/2014		Other Database Import	Lam,T.Y.; Zhou,B.; Wang,J.; Chai,Y.; Shen,Y.; Chen,X.; Ma,C.; Hong,W.; Chen,Y.; Zhang,Y.; Duan,L.; Chen,P.; Jiang,J.; Li,L.; Poon,L.M.; Webby,R.J.; Smith,D.K.; Leung,G.M.; Peiris,J.M.; Holmes,E.C.; Guan,Y.; Zhu,H.
EPI596853	PB1	China	2014-Feb-20	A/chicken/Dongguan/856/2014		Other Database Import	Lam,T.Y.; Zhou,B.; Wang,J.; Chai,Y.; Shen,Y.; Chen,X.; Ma,C.; Hong,W.; Chen,Y.; Zhang,Y.; Duan,L.; Chen,P.; Jiang,J.; Li,L.; Poon,L.M.; Webby,R.J.; Smith,D.K.; Leung,G.M.; Peiris,J.M.; Holmes,E.C.; Guan,Y.; Zhu,H.
EPI528352	PB1	China	2014-Feb-20	A/Chicken/Jilin/13199/2014	WHO Chinese National Influenza Center	WHO Chinese National Influenza Center	Wang,Dayan;Gao,Rongbao;Yang,Lei;Zhou,Shumei;Li,Xiyan;Zhou,Jianfang;Zhu,Wenfei;Guo,Junfeng;Li,Xiaodan;Dong,Jie;Huang,Weijuan;Zhang,Ye;Dong,Libo;Zhao,Xiang;Lu,Jian;Lan,Yu;Shu,Yuelong
EPI898446	PB1	Vietnam	2014-Feb-20	A/chicken/Vietnam/NCVD14-A461/2014		Other Database Import	Davis,T.; Jang,Y.
EPI597571	PB1	China	2014-Feb-21	A/chicken/Dongguan/1415/2014		Other Database Import	Lam,T.Y.; Zhou,B.; Wang,J.; Chai,Y.; Shen,Y.; Chen,X.; Ma,C.; Hong,W.; Chen,Y.; Zhang,Y.; Duan,L.; Chen,P.; Jiang,J.; Li,L.; Poon,L.M.; Webby,R.J.; Smith,D.K.; Leung,G.M.; Peiris,J.M.; Holmes,E.C.; Guan,Y.; Zhu,H.
EPI597095	PB1	China	2014-Feb-21	A/chicken/Dongguan/1523/2014		Other Database Import	Lam,T.Y.; Zhou,B.; Wang,J.; Chai,Y.; Shen,Y.; Chen,X.; Ma,C.; Hong,W.; Chen,Y.; Zhang,Y.; Duan,L.; Chen,P.; Jiang,J.; Li,L.; Poon,L.M.; Webby,R.J.; Smith,D.K.; Leung,G.M.; Peiris,J.M.; Holmes,E.C.; Guan,Y.; Zhu,H.
EPI837634	PB1	China	2014-Feb-26	A/migratory-waterfowl/Hubei/Chenhu1347/2014		Other Database Import	Bi,Y.; Liu,H.; Xiong,C.; Di,Liu.; Shi,W.; Li,M.; Liu,S.; Chen,J.; Chen,G.; Li,Y.; Yang,G.; Lei,Y.; Xiong,Y.; Lei,F.; Wang,H.; Chen,Q.; Gao,G.F.
EPI601383	PB1	China	2014-Jan-05	A/chicken/Jiangxi/1244/2014		Other Database Import	Ma,C.; Lam,T.T.Y.; Chai,Y.; Wang,J.; Fan,X.; Hong,W.; Zhang,Y.; Li,L.; Liu,Y.; Smith,D.K.; Webby,R.J.; Peiris,J.S.M.; Zhu,H.; Guan,Y.
EPI601971	PB1	China	2014-Jan-05	A/chicken/Jiangxi/1271/2014		Other Database Import	Ma,C.; Lam,T.T.Y.; Chai,Y.; Wang,J.; Fan,X.; Hong,W.; Zhang,Y.; Li,L.; Liu,Y.; Smith,D.K.; Webby,R.J.; Peiris,J.S.M.; Zhu,H.; Guan,Y.
EPI652985	PB1	China	2014-Jan-10	A/chicken/Qingdao/014/2014		Other Database Import	Wang,K.; Zhuang,Q.; Chen,J.
EPI601272	PB1	China	2014-Jan-12	A/chicken/Jiangxi/3119/2014		Other Database Import	Ma,C.; Lam,T.T.Y.; Chai,Y.; Wang,J.; Fan,X.; Hong,W.; Zhang,Y.; Li,L.; Liu,Y.; Smith,D.K.; Webby,R.J.; Peiris,J.S.M.; Zhu,H.; Guan,Y.
EPI602462	PB1	China	2014-Jan-12	A/chicken/Jiangxi/3152/2014		Other Database Import	Ma,C.; Lam,T.T.Y.; Chai,Y.; Wang,J.; Fan,X.; Hong,W.; Zhang,Y.; Li,L.; Liu,Y.; Smith,D.K.; Webby,R.J.; Peiris,J.S.M.; Zhu,H.; Guan,Y.
EPI509703	PB1	Korea,-Republic-of	2014-Jan-17	A/broiler-duck/Korea/Buan2/2014		Other Database Import	Lee,Y. J.; Kang,H. M.; Lee,E. K.; Song,B. M.; Jeong,J.; Kwon,Y. K.; Kim,H. R.; Lee,K. J.; Hong,M. S.; Jang,I.; Choi,K. S.; Kim,J. Y.; Lee,H. J.; Kang,M. S.; Jeong,O. M.; Baek,J. H.; Joo,Y. S.; Park,Y.Ho.; Lee,H. S.; Park,Y.H.
EPI672772	PB1	China	2014-Jan-20	A/wildfowl/China/472/2014	Institute of Poultry Science, Shandong, Academy of Agricultural Science	South China Agricultural University	Wang, Youling
EPI561541	PB1	Korea,-Republic-of	2014-Jan-22	A/Baikal-teal/Korea/H68/2014		Other Database Import	Jeong,J.; Kang,H.M.; Lee,E.K.; Song,B.M.; Kwon,Y.K.; Kim,H.R.; Choi,K.S.; Kim,J.Y.; Lee,H.J.; Moon,O.K.; Jeong,W.; Choi,J.; Baek,J.H.; Joo,Y.S.; Park,Y.H.; Lee,H.S.; Lee,Y.J.; Lee,Y. J.; Kang,H. M.; Lee,E. K.; Song,B. M.; Lee,K. J.; Hong,M. S.
EPI561590	PB1	Korea,-Republic-of	2014-Jan-25	A/breeder-duck/Korea/H128/2014		Other Database Import	Jeong,J.; Kang,H.M.; Lee,E.K.; Song,B.M.; Kwon,Y.K.; Kim,H.R.; Choi,K.S.; Kim,J.Y.; Lee,H.J.; Moon,O.K.; Jeong,W.; Choi,J.; Baek,J.H.; Joo,Y.S.; Park,Y.H.; Lee,H.S.; Lee,Y.J.; Lee,Y. J.; Kang,H. M.; Lee,E. K.; Song,B. M.; Lee,K. J.; Hong,M. S.
EPI561597	PB1	Korea,-Republic-of	2014-Jan-25	A/broiler-duck/Korea/H133/2014		Other Database Import	Jeong,J.; Kang,H.M.; Lee,E.K.; Song,B.M.; Kwon,Y.K.; Kim,H.R.; Choi,K.S.; Kim,J.Y.; Lee,H.J.; Moon,O.K.; Jeong,W.; Choi,J.; Baek,J.H.; Joo,Y.S.; Park,Y.H.; Lee,H.S.; Lee,Y.J.; Lee,Y. J.; Kang,H. M.; Lee,E. K.; Song,B. M.; Lee,K. J.; Hong,M. S.
EPI647449	PB1	China	2014-Jul-01	A/chicken/Zhejiang/727031/2014		Other Database Import	Wu,H.; Peng,X.; Cheng,L.; Wu,N.
EPI681063	PB1	China	2014-Jul-07	A/chicken/Zhejiang/77082/2014		Other Database Import	Wu,H.; Peng,X.; Cheng,L.; Lu,X.; Jin,C.; Xie,T.; Yao,H.; Wu,N.
EPI649180	PB1	China	2014-Jul-07	A/duck/Zhejiang/77127/2014		Other Database Import	Wu,H.; Peng,X.; Cheng,L.; Lu,X.; Jin,C.; Xie,T.; Yao,H.; Wu,N.
EPI681217	PB1	China	2014-Jul-07	A/goose/Zhejiang/77167/2014		Other Database Import	Wu,H.; Peng,X.; Cheng,L.; Lu,X.; Jin,C.; Xie,T.; Yao,H.; Wu,N.
EPI681077	PB1	China	2014-Jul-07	A/pigeon/Zhejiang/77037/2014		Other Database Import	Wu,H.; Peng,X.; Cheng,L.; Lu,X.; Jin,C.; Xie,T.; Yao,H.; Wu,N.
EPI681232	PB1	China	2014-Jul-27	A/chicken/Zhejiang/727155/2014		Other Database Import	Wu,H.; Peng,X.; Cheng,L.; Lu,X.; Jin,C.; Xie,T.; Yao,H.; Wu,N.
EPI681222	PB1	China	2014-Jul-27	A/goose/Zhejiang/727092/2014		Other Database Import	Wu,H.; Peng,X.; Cheng,L.; Lu,X.; Jin,C.; Xie,T.; Yao,H.; Wu,N.
EPI681078	PB1	China	2014-Jul-27	A/pigeon/Zhejiang/727044/2014		Other Database Import	Wu,H.; Peng,X.; Cheng,L.; Lu,X.; Jin,C.; Xie,T.; Yao,H.; Wu,N.
EPI585730	PB1	China	2014-Jun-01	A/swan-goose/Jilin/JL01/2014		Other Database Import	Yu,Z.; Wang,T.; Gao,X.; Gao,Y.; Xia,X.
EPI593371	PB1	China	2014-Jun-07	A/chicken/Jiangxi/17989/2014		Other Database Import	Lam,T.Y.; Zhou,B.; Wang,J.; Chai,Y.; Shen,Y.; Chen,X.; Ma,C.; Hong,W.; Chen,Y.; Zhang,Y.; Duan,L.; Chen,P.; Jiang,J.; Li,L.; Poon,L.M.; Webby,R.J.; Smith,D.K.; Leung,G.M.; Peiris,J.M.; Holmes,E.C.; Guan,Y.; Zhu,H.
EPI644462	PB1	China	2014-Mar-01	A/chicken/Zhejiang/2C66/2014		Other Database Import	Wu,H.; Lu,R.; Wu,X.; Peng,X.; Xu,L.; Cheng,L.; Lu,X.; Jin,C.; Xie,T.; Yao,H.; Wu,N.
EPI592030	PB1	China	2014-Mar-16	A/chicken/Jiangxi/12210/2014		Other Database Import	Lam,T.Y.; Zhou,B.; Wang,J.; Chai,Y.; Shen,Y.; Chen,X.; Ma,C.; Hong,W.; Chen,Y.; Zhang,Y.; Duan,L.; Chen,P.; Jiang,J.; Li,L.; Poon,L.M.; Webby,R.J.; Smith,D.K.; Leung,G.M.; Peiris,J.M.; Holmes,E.C.; Guan,Y.; Zhu,H.
EPI592044	PB1	China	2014-Mar-16	A/chicken/Jiangxi/12221/2014		Other Database Import	Lam,T.Y.; Zhou,B.; Wang,J.; Chai,Y.; Shen,Y.; Chen,X.; Ma,C.; Hong,W.; Chen,Y.; Zhang,Y.; Duan,L.; Chen,P.; Jiang,J.; Li,L.; Poon,L.M.; Webby,R.J.; Smith,D.K.; Leung,G.M.; Peiris,J.M.; Holmes,E.C.; Guan,Y.; Zhu,H.
EPI592374	PB1	China	2014-Mar-16	A/chicken/Jiangxi/12243/2014		Other Database Import	Lam,T.Y.; Zhou,B.; Wang,J.; Chai,Y.; Shen,Y.; Chen,X.; Ma,C.; Hong,W.; Chen,Y.; Zhang,Y.; Duan,L.; Chen,P.; Jiang,J.; Li,L.; Poon,L.M.; Webby,R.J.; Smith,D.K.; Leung,G.M.; Peiris,J.M.; Holmes,E.C.; Guan,Y.; Zhu,H.
EPI600210	PB1	China	2014-Mar-30	A/chicken/Jiangxi/13202/2014		Other Database Import	Ma,C.; Lam,T.T.Y.; Chai,Y.; Wang,J.; Fan,X.; Hong,W.; Zhang,Y.; Li,L.; Liu,Y.; Smith,D.K.; Webby,R.J.; Peiris,J.S.M.; Zhu,H.; Guan,Y.
EPI602243	PB1	China	2014-Mar-30	A/chicken/Jiangxi/13217/2014		Other Database Import	Ma,C.; Lam,T.T.Y.; Chai,Y.; Wang,J.; Fan,X.; Hong,W.; Zhang,Y.; Li,L.; Liu,Y.; Smith,D.K.; Webby,R.J.; Peiris,J.S.M.; Zhu,H.; Guan,Y.
EPI592135	PB1	China	2014-Mar-30	A/chicken/Jiangxi/13230/2014		Other Database Import	Lam,T.Y.; Zhou,B.; Wang,J.; Chai,Y.; Shen,Y.; Chen,X.; Ma,C.; Hong,W.; Chen,Y.; Zhang,Y.; Duan,L.; Chen,P.; Jiang,J.; Li,L.; Poon,L.M.; Webby,R.J.; Smith,D.K.; Leung,G.M.; Peiris,J.M.; Holmes,E.C.; Guan,Y.; Zhu,H.
EPI602271	PB1	China	2014-Mar-30	A/chicken/Jiangxi/13238/2014		Other Database Import	Ma,C.; Lam,T.T.Y.; Chai,Y.; Wang,J.; Fan,X.; Hong,W.; Zhang,Y.; Li,L.; Liu,Y.; Smith,D.K.; Webby,R.J.; Peiris,J.S.M.; Zhu,H.; Guan,Y.
EPI602212	PB1	China	2014-Mar-30	A/chicken/Jiangxi/13249/2014		Other Database Import	Ma,C.; Lam,T.T.Y.; Chai,Y.; Wang,J.; Fan,X.; Hong,W.; Zhang,Y.; Li,L.; Liu,Y.; Smith,D.K.; Webby,R.J.; Peiris,J.S.M.; Zhu,H.; Guan,Y.
EPI602159	PB1	China	2014-Mar-30	A/chicken/Jiangxi/13274/2014		Other Database Import	Ma,C.; Lam,T.T.Y.; Chai,Y.; Wang,J.; Fan,X.; Hong,W.; Zhang,Y.; Li,L.; Liu,Y.; Smith,D.K.; Webby,R.J.; Peiris,J.S.M.; Zhu,H.; Guan,Y.
EPI964987	PB1	Bangladesh	2014-Nov-16	A/duck/Bangladesh/23858/2014		Other Database Import	Marinova Petkova,A.; Shanmuganatham,K.; Feeroz,M.M.; Jones Engel,L.; Hasan,M.K.; Akhtar,S.; Turner,J.; Walker,D.; Seiler,P.; Franks,J.; McKenzie,P.; Krauss,S.; Webby,R.J.; Webster,R.G.; Hasan,K.; Seiler,J.
EPI1060984	PB1	China	2014-Nov-20	A/goose/Zhejiang/1120078/2014		Other Database Import	Wu,H.; Lu,R.; Peng,X.; Liu,F.; Cheng,L.; Wu,N.
EPI1060986	PB1	China	2014-Nov-20	A/goose/Zhejiang/1120084/2014		Other Database Import	Wu,H.; Lu,R.; Peng,X.; Liu,F.; Cheng,L.; Wu,N.
EPI681212	PB1	China	2014-Nov-20	A/goose/Zhejiang/112071/2014		Other Database Import	Wu,H.; Peng,X.; Cheng,L.; Lu,X.; Jin,C.; Xie,T.; Yao,H.; Wu,N.
EPI580273	PB1	China	2014-Nov-30	A/Chicken/Guangdong/DG479/2014	South China Agricultural University	South China Agricultural University	Shumin,Xie;Weixin,Jia;Yicun,Lin;Kaixiang,Xing;Xingxing,Ren;Wenbao,Qi;Ming,Liao
EPI736689	PB1	China	2014-Oct-12	A/duck/Guizhou/013/2014		Other Database Import	Duan,Z.; Chen,J.; Ji,X.; Xu,H.; Ruan,Y.; Zhao,J.
EPI596608	PB1	Vietnam	2014-Oct-13	A/duck/Vietnam/LBM758/2014		Other Database Import	Soda,K.; Hotta,K.; Trang,H.U.; Le,Q.M.; Yamashiro,T.; Ito,T.
EPI596584	PB1	Vietnam	2014-Oct-13	A/muscovy-duck/Vietnam/LBM754/2014		Other Database Import	Soda,K.; Hotta,K.; Trang,H.U.; Le,Q.M.; Yamashiro,T.; Ito,T.
EPI839145	PB1	China	2014-Sep-08	A/Gallinula-chloropus/Guangdong/GZ174/2014		Other Database Import	Kang,Y.; Feng,M.; Ren,T.
EPI681071	PB1	China	2014-Sep-25	A/chicken/Zhejiang/925134/2014		Other Database Import	Wu,H.; Peng,X.; Cheng,L.; Lu,X.; Jin,C.; Xie,T.; Yao,H.; Wu,N.
EPI681226	PB1	China	2014-Sep-25	A/goose/Zhejiang/925106/2014		Other Database Import	Wu,H.; Peng,X.; Cheng,L.; Lu,X.; Jin,C.; Xie,T.; Yao,H.; Wu,N.
EPI760211	PB1	China	2015-Apr-06	A/duck/Hunan/161/2015		Other Database Import	Li,X.; Yang,J.; Liu,B.; Jia,Y.; Guo,J.; Gao,X.; Weng,S.; Yang,M.; Wang,L.; Wang,L.F.; Cui,J.; Chen,H.; Zhu,Q.
EPI1060781	PB1	Hong-Kong-(SAR)	2015-Apr-30	A/oriental-magpie-robin/HK/6154/2015		Other Database Import	Hui,P.Y.; Chan,L.Y.; Kuok,I.T.; Mok,K.P.; Yang,Z.; Li,R.; Luk,S.M.; Lee,F.; Yen,H.L.; Zhu,H.; Guan,Y.; Nicholls,J.; Peiris,M.; Chan,C.W.
EPI965505	PB1	Bangladesh	2015-Aug-25	A/quail/Bangladesh/25987/2015		Other Database Import	Barman,S.; Marinova Petkova,A.; Hasan,M.K.; Akhtar,S.; Turner,J.C.; Franks,J.; Walker,D.; Seiler,P.; Friedman,K.; Kercher,L.; Kayali,G.; Jones Engel,L.; McKenzie,P.; Krauss,S.; Webby,R.J.; Feeroz,M.M.; Webster,R.G.
EPI693704	PB1	Mongolia	2015-Aug-30	A/duck/Mongolia/83/2015		Other Database Import	Matsuno,K.; Okamatsu,M.; Kida,H.; Sakoda,Y.; Matuno,K.; Hatamachi,J.
EPI895208	PB1	China	2015-Dec-12	A/chicken/Ganzhou/GZ27/2015		Other Database Import	Chen,L.J.; Tian,J.H.; Lin,X.D.; Liao,Y.; Shi,M.; Zhang,Y.Z.
EPI683154	PB1	China	2015	A/chicken/Wenzhou/RAQL01/2015		Other Database Import	Chen,L. J.; Lin,X. D.; Guo,W. P.; Tian,J. H.; Zhang,Y. Z.
EPI683140	PB1	China	2015	A/turtledove/Wuhan/HKBJ43/2015		Other Database Import	Chen,L. J.; Lin,X. D.; Guo,W. P.; Tian,J. H.; Zhang,Y. Z.
EPI775079	PB1	Vietnam	2015-Jan-06	A/duck/CaMau/0237/2015		Other Database Import	Cao,B.V.; Le Ha,T.D.; Mai,V.N.; Dang Trinh,M.A.; Le Phan,K.N.; Vo Tran,N.T.; Hoang,T.
EPI775087	PB1	Vietnam	2015-Jan-06	A/duck/CaMau/0238/2015		Other Database Import	Cao,B.V.; Le Ha,T.D.; Mai,V.N.; Dang Trinh,M.A.; Le Phan,K.N.; Vo Tran,N.T.; Hoang,T.
EPI590548	PB1	Taiwan	2015-Jan-15	A/chicken/PT/a158/2015		Other Database Import	Cheng,M. C.; Tan,D. H.; Chen,L. H.; Liu,Y. P.; Lin,Y. J.; Tsai,H. J.; Chang,P. C.
EPI690542	PB1	Taiwan	2015-Jan-17	A/goose/Taiwan/TNC4/2015		Other Database Import	Huang,P.Y.; Lee,C.D.; Yip,C.H.; Cheung,C.L.; Yu,G.; Lam,T.T.; Smith,D.K.; Zhu,H.; Guan,Y.; Lee,C.C.; Lam,T.Y.
EPI690718	PB1	Taiwan	2015-Jan-17	A/goose/Taiwan/TNO12/2015		Other Database Import	Huang,P.Y.; Lee,C.D.; Yip,C.H.; Cheung,C.L.; Yu,G.; Lam,T.T.; Smith,D.K.; Zhu,H.; Guan,Y.; Lee,C.C.; Lam,T.Y.
EPI946748	PB1	Japan	2015-Jul-07	A/chicken/Japan/AQ-HE61/2015		Other Database Import	Shibata,A.; Hiono,T.; Okamatsu,M.; Osaka,H.; Sakoda,Y.
EPI965346	PB1	Bangladesh	2015-Jul-10	A/duck/Bangladesh/25891/2015		Other Database Import	Barman,S.; Marinova Petkova,A.; Hasan,M.K.; Akhtar,S.; Turner,J.C.; Franks,J.; Walker,D.; Seiler,P.; Friedman,K.; Kercher,L.; Kayali,G.; Jones Engel,L.; McKenzie,P.; Krauss,S.; Webby,R.J.; Feeroz,M.M.; Webster,R.G.
EPI729796	PB1	China	2015-May-01	A/chicken/Shanghai/06/2015		Other Database Import	Ge,F.
EPI641383	PB1	China	2015-May-05	A/chicken/Shandong/1167/2015		Other Database Import	Tan,L.; Xu,C.T.; Zhao,X.; Huang,Q.; Huang,Y.; Zhu,F.; Gao,D.; Zhang,L.; Yang,S.; Zhang,X.
EPI753500	PB1	China	2015-May-14	A/chicken/Zhejiang/514132/2015		Other Database Import	Wu,H.; Lu,R.; Peng,X.; Cheng,L.; Jin,C.; Lu,X.; Xie,T.; Yao,H.; Wu,N.
EPI895207	PB1	China	2016-Feb-19	A/chicken/Taishun/TS2/2016		Other Database Import	Chen,L.J.; Tian,J.H.; Lin,X.D.; Liao,Y.; Shi,M.; Zhang,Y.Z.

## Sheet: PA
Table S1. GISAID acknowledgements for PA segment.
Isolate ID	Segment	Country	Collection date	Isolate name	Originating Laboratory	Submitting Laboratory	Authors
EPI89463	PA	China	1979	A/duck/Hong-Kong/784/1979		Other Database Import
EPI590168	PA	Hong-Kong-(SAR)	1980	A/duck/Hong-Kong/819/1980		Other Database Import	Kida,H.; Sakoda,Y.; Okamatsu,M.; Matsuno,K.; Masani,K.; Hatamachi,J.
EPI590182	PA	Hong-Kong-(SAR)	1980	A/duck/Hong-Kong/820/1980		Other Database Import	Kida,H.; Sakoda,Y.; Okamatsu,M.; Matsuno,K.; Masani,K.; Hatamachi,J.
EPI5783	PA	China	1996	A/Goose/Guangdong/1/96		Other Database Import
EPI325	PA	Japan	1997	A/parakeet/Chiba/1/97		Other Database Import
EPI82020	PA	China	1999	A/chicken/Guangxi/9/99		Other Database Import
EPI82014	PA	China	2001	A/chicken/Guangdong/56/01		Other Database Import
EPI1478	PA	Japan	2001	A/chicken/Osaka/aq58/2001		Other Database Import
EPI236553	PA	Hong-Kong-(SAR)	2001	A/Duck/Hong-Kong/380.5/2001		Other Database Import	Kim,L.M.; Scott,M.A.; Suarez,D.L.; Spackman,E.; Swayne,D.E.; Afonso,C.L.
EPI268947	PA	China	2001	A/duck/Shantou/1197/2001		Other Database Import	Huang,K.; Bahl,J.; Fan,X.; Vijaykrishna,D.; Cheung,C.; Webby,R.J.; Webster,R.G.; Chen,H.; Smith,G.J.D.; Peiris,M.J.S.; Guan,Y.
EPI235802	PA	China	2002	A/chicken/Jilin/hd/2002		Other Database Import	Liao,X.; Zhang,X.; Wang,J.; Yu,J.; Jin,N.
EPI102425	PA	Taiwan	2002	A/chicken/Taiwan/0222/02		Other Database Import
EPI102441	PA	Taiwan	2002	A/chicken/Taiwan/0408/02		Other Database Import
EPI102427	PA	Taiwan	2002	A/chicken/Taiwan/PF1/02		Other Database Import
EPI102431	PA	Taiwan	2002	A/chicken/Taiwan/PF3/02		Other Database Import
EPI1532	PA	Japan	2002	A/chicken/Yokohama/aq134/2002		Other Database Import
EPI268899	PA	China	2002	A/duck/Shantou/1706/2002		Other Database Import	Huang,K.; Bahl,J.; Fan,X.; Vijaykrishna,D.; Cheung,C.; Webby,R.J.; Webster,R.G.; Chen,H.; Smith,G.J.D.; Peiris,M.J.S.; Guan,Y.
EPI268897	PA	China	2002	A/duck/Shantou/2061/2002		Other Database Import	Huang,K.; Bahl,J.; Fan,X.; Vijaykrishna,D.; Cheung,C.; Webby,R.J.; Webster,R.G.; Chen,H.; Smith,G.J.D.; Peiris,M.J.S.; Guan,Y.
EPI376197	PA	China	2003-Apr-01	A/duck/Fujian/MH/2003		Other Database Import	Fu,G.; Huang,Y.
EPI184116	PA	Pakistan	2003	A/chicken/Karachi/NARC-23/2003		Other Database Import	Abbas,M.A.; Spackman,E.; Ahmed,Z.; Naeem,K.; Siddique,N.; Swayne,D.; Sarmento,L.; Hameed,A.
EPI25024	PA	China	2004	A/chicken/Guangdong/178/04		Other Database Import
EPI25009	PA	China	2004	A/chicken/Guangdong/191/04		Other Database Import
EPI167109	PA	Thailand	2004	A/chicken/Kohn-Kaen/NIAH330/2004		Other Database Import
EPI171050	PA	Vietnam	2004	A/chicken/Vietnam/933/2004		Other Database Import
EPI268979	PA	China	2004	A/duck/Hunan/3748/2004		Other Database Import	Huang,K.; Bahl,J.; Fan,X.; Vijaykrishna,D.; Cheung,C.; Webby,R.J.; Webster,R.G.; Chen,H.; Smith,G.J.D.; Peiris,M.J.S.; Guan,Y.
EPI107178	PA	Thailand	2004	A/open-billed-stork/Nakhonsawan/BBD0104F/2004		Other Database Import
EPI170711	PA	Vietnam	2005-Dec-06	A/duck/Vietnam/203/2005		Other Database Import
EPI170627	PA	Vietnam	2005-Dec-16	A/duck/Vietnam/215/2005		Other Database Import
EPI170620	PA	Vietnam	2005-Dec-18	A/chicken/Vietnam/216/2005		Other Database Import
EPI153710	PA	Israel	2005	A/chicken/Israel/793/2005		Other Database Import
EPI227015	PA	Vietnam	2005	A/chicken/Ninh-Binh/209/2005		Other Database Import	Kim,L.M.; Scott,M.A.; Suarez,D.L.; Spackman,E.; Swayne,D.E.; Afonso,C.L.
EPI275869	PA	China	2005	A/chicken/Sichuan/81/2005		Other Database Import	Li,Y.; Shi,J.; Zhong,G.; Deng,G.; Tian,G.; Ge,J.; Zeng,X.; Song,J.; Zhao,D.; Liu,L.; Jiang,Y.; Guan,Y.; Bu,Z.; Chen,H.
EPI47326	PA	Vietnam	2005	A/chicken/Viet-Nam/10/2005		Other Database Import
EPI47345	PA	Vietnam	2005	A/chicken/Viet-Nam/11/2005		Other Database Import
EPI47307	PA	Vietnam	2005	A/chicken/Viet-Nam/9/2005		Other Database Import
EPI268835	PA	China	2005	A/duck/Fujian/629/2005		Other Database Import	Huang,K.; Bahl,J.; Fan,X.; Vijaykrishna,D.; Cheung,C.; Webby,R.J.; Webster,R.G.; Chen,H.; Smith,G.J.D.; Peiris,M.J.S.; Guan,Y.
EPI268843	PA	China	2005	A/duck/Guangxi/141/2005		Other Database Import	Huang,K.; Bahl,J.; Fan,X.; Vijaykrishna,D.; Cheung,C.; Webby,R.J.; Webster,R.G.; Chen,H.; Smith,G.J.D.; Peiris,M.J.S.; Guan,Y.
EPI268860	PA	China	2005	A/duck/Shantou/2472/2005		Other Database Import	Huang,K.; Bahl,J.; Fan,X.; Vijaykrishna,D.; Cheung,C.; Webby,R.J.; Webster,R.G.; Chen,H.; Smith,G.J.D.; Peiris,M.J.S.; Guan,Y.
EPI110852	PA	Thailand	2005	A/open-billed-stork/Nakhonsawan/BBD2416F/05		Other Database Import
EPI167120	PA	Thailand	2005	A/pigeon/Thailand/VSMU-13-KRI/2005		Other Database Import
EPI363518	PA	China	2006-Feb-01	A/duck/Guizhou/1084/2006		Other Database Import	Huang,K.; Zhu,H.; Fan,X.; Wang,J.; Cheung,C.L.; Duan,L.; Hong,W.; Liu,Y.; Li,L.; Smith,D.K.; Chen,H.; Webster,R.G.; Webby,R.J.; Peiris,M.; Guan,Y.; Cheung,C. L.
EPI122609	PA	China	2006	A/bird/Guangxi/H1/2006		Other Database Import
EPI47136	PA	Afghanistan	2006	A/chicken/Afghanistan/1207/2006		Other Database Import
EPI58574	PA	Afghanistan	2006	A/chicken/Afghanistan/1573-47/2006		Other Database Import
EPI58593	PA	Afghanistan	2006	A/chicken/Afghanistan/1573-65/2006		Other Database Import
EPI60322	PA	Afghanistan	2006	A/chicken/Afghanistan/1573-7/2006		Other Database Import
EPI275829	PA	China	2006	A/chicken/Ningxia/24/2006		Other Database Import	Li,Y.; Shi,J.; Zhong,G.; Deng,G.; Tian,G.; Ge,J.; Zeng,X.; Song,J.; Zhao,D.; Liu,L.; Jiang,Y.; Guan,Y.; Bu,Z.; Chen,H.
EPI408093	PA	Myanmar	2006	A/chicken/Pyigyitagon/204/2006		Other Database Import	Saito,T.; Watanabe,C.; Hayashi,T.; Uchida,Y.; Myint,W.W.; Thein,W.Z.; Takemae,N.; Mase,M.; Okamatsu,M.; Mar,A.; Mon,C.C.; Gawng,L.T.; Sann,K.; Kyi,T.A.; Yamaguchi,S.
EPI368252	PA	Thailand	2006	A/duck/Thailand/TS01/2006		Other Database Import	Songserm,T.; Wiboon ut,S.; Kanchongkittiphon,W.; Na Ek,P.; Thitithanyanont,A.
EPI276077	PA	China	2006	A/wild-duck/Liaoning/8/2006		Other Database Import	Li,Y.; Shi,J.; Zhong,G.; Deng,G.; Tian,G.; Ge,J.; Zeng,X.; Song,J.; Zhao,D.; Liu,L.; Jiang,Y.; Guan,Y.; Bu,Z.; Chen,H.
EPI363638	PA	China	2006-Jul-01	A/duck/Shantou/14167/2006		Other Database Import	Huang,K.; Zhu,H.; Fan,X.; Wang,J.; Cheung,C.L.; Duan,L.; Hong,W.; Liu,Y.; Li,L.; Smith,D.K.; Chen,H.; Webster,R.G.; Webby,R.J.; Peiris,M.; Guan,Y.; Cheung,C. L.
EPI363454	PA	China	2006-Mar-01	A/duck/Guangxi/1074/2006		Other Database Import	Huang,K.; Zhu,H.; Fan,X.; Wang,J.; Cheung,C.L.; Duan,L.; Hong,W.; Liu,Y.; Li,L.; Smith,D.K.; Chen,H.; Webster,R.G.; Webby,R.J.; Peiris,M.; Guan,Y.; Cheung,C. L.
EPI177761	PA	Pakistan	2006-May-02	A/chicken/Pakistan/UDL-01/2006		Other Database Import
EPI365161	PA	China	2006-Nov-01	A/duck/Fujian/10950/2006		Other Database Import	Huang,K.; Zhu,H.; Fan,X.; Wang,J.; Cheung,C.L.; Duan,L.; Hong,W.; Liu,Y.; Li,L.; Smith,D.K.; Chen,H.; Webster,R.G.; Webby,R.J.; Peiris,M.; Guan,Y.; Cheung,C. L.
EPI363850	PA	China	2006-Sep-01	A/duck/Fujian/9062/2006		Other Database Import	Huang,K.; Zhu,H.; Fan,X.; Wang,J.; Cheung,C.L.; Duan,L.; Hong,W.; Liu,Y.; Li,L.; Smith,D.K.; Chen,H.; Webster,R.G.; Webby,R.J.; Peiris,M.; Guan,Y.; Cheung,C. L.
EPI365010	PA	China	2007-Dec-01	A/duck/Fujian/7844/2007		Other Database Import	Huang,K.; Zhu,H.; Fan,X.; Wang,J.; Cheung,C.L.; Duan,L.; Hong,W.; Liu,Y.; Li,L.; Smith,D.K.; Chen,H.; Webster,R.G.; Webby,R.J.; Peiris,M.; Guan,Y.; Cheung,C. L.
EPI365018	PA	China	2007-Dec-01	A/duck/Fujian/8349/2007		Other Database Import	Huang,K.; Zhu,H.; Fan,X.; Wang,J.; Cheung,C.L.; Duan,L.; Hong,W.; Liu,Y.; Li,L.; Smith,D.K.; Chen,H.; Webster,R.G.; Webby,R.J.; Peiris,M.; Guan,Y.; Cheung,C. L.
EPI181405	PA	Israel	2007-Dec-02	A/chicken/Israel/951/2007		Other Database Import
EPI181539	PA	Indonesia	2007	A/chicken/East-Java/UT6044/2007		Other Database Import
EPI164573	PA	Lao,-People's-Democratic-Republic	2007	A/chicken/Laos/P0171/2007		Other Database Import
EPI285941	PA	Vietnam	2007	A/duck/Soc-Trang/07-25/2007		Other Database Import	Kim,L.M.; Scott,M.A.; Suarez,D.L.; Spackman,E.; Swayne,D.E.; Afonso,C.L.
EPI620853	PA	Vietnam	2007	A/duck/Vietnam-Hau-Giang/NCVD-12/2007		Other Database Import	Pantin Jackwood,M.J.; Spackman,E.; Suarez,D.L.; Wasilenko,J.; Sarmento,L.; Shepherd,E.; Smith,D.; Lee,S.; Lone,N.A.
EPI350628	PA	Vietnam	2007	A/duck/Vietnam/NCVD-102/2007	National Centre of Veterinary Diagnostics	Centers for Disease Control and Prevention	Davis,Todd; Rivailler,Pierre; Nguyen,Tung
EPI350670	PA	Vietnam	2007	A/duck/Vietnam/NCVD-118/2007	National Centre of Veterinary Diagnostics	Centers for Disease Control and Prevention	Davis,Todd; Rivailler,Pierre; Nguyen,Tung
EPI221606	PA	Vietnam	2007	A/Muscovy-duck/Ca-Mau/07-04/2007		Other Database Import	Kim,L.M.; Scott,M.A.; Suarez,D.L.; Spackman,E.; Swayne,D.E.; Afonso,C.L.
EPI594012	PA	China	2007-Jan-11	A/chicken/Jiangsu/01/2007		Other Database Import	Zhao,M.; Gu,X.; Chen,H.; Liu,Q.; Zhong,L.; Huang,J.; Gu,M.; Liu,X.
EPI364034	PA	China	2007-Jul-01	A/duck/Shantou/1240/2007		Other Database Import	Huang,K.; Zhu,H.; Fan,X.; Wang,J.; Cheung,C.L.; Duan,L.; Hong,W.; Liu,Y.; Li,L.; Smith,D.K.; Chen,H.; Webster,R.G.; Webby,R.J.; Peiris,M.; Guan,Y.; Cheung,C. L.
EPI365112	PA	China	2007-Jun-01	A/duck/Fujian/1879/2007		Other Database Import	Huang,K.; Zhu,H.; Fan,X.; Wang,J.; Cheung,C.L.; Duan,L.; Hong,W.; Liu,Y.; Li,L.; Smith,D.K.; Chen,H.; Webster,R.G.; Webby,R.J.; Peiris,M.; Guan,Y.; Cheung,C. L.
EPI364982	PA	China	2007-Nov-01	A/duck/Fujian/6841/2007		Other Database Import	Huang,K.; Zhu,H.; Fan,X.; Wang,J.; Cheung,C.L.; Duan,L.; Hong,W.; Liu,Y.; Li,L.; Smith,D.K.; Chen,H.; Webster,R.G.; Webby,R.J.; Peiris,M.; Guan,Y.; Cheung,C. L.
EPI610325	PA	China	2007-Nov-20	A/chicken/Guangxi/LF/2007		Other Database Import	Peng,Y.; Xie,Z.; Liu,J.; Pang,Y.; Xie,L.; Luo,S.; Fan,Q.
EPI364937	PA	China	2007-Sep-01	A/duck/Fujian/4676/2007		Other Database Import	Huang,K.; Zhu,H.; Fan,X.; Wang,J.; Cheung,C.L.; Duan,L.; Hong,W.; Liu,Y.; Li,L.; Smith,D.K.; Chen,H.; Webster,R.G.; Webby,R.J.; Peiris,M.; Guan,Y.; Cheung,C. L.
EPI557735	PA	China	2008-Apr-01	A/chicken/Anhui/1/2008		Other Database Import	Zhu,Y.
EPI350663	PA	Vietnam	2008-Dec-01	A/duck/Vietnam/NCVD-140/2008	National Centre of Veterinary Diagnostics	Centers for Disease Control and Prevention	Davis,Todd; Rivailler,Pierre; Nguyen,Tung
EPI350747	PA	Vietnam	2008-Dec-01	A/duck/Vietnam/NCVD-160/2008	National Centre of Veterinary Diagnostics	Centers for Disease Control and Prevention	Davis,Todd; Rivailler,Pierre; Nguyen,Tung
EPI610280	PA	China	2008-Dec-12	A/chicken/Guangxi/DX/2008		Other Database Import	Peng,Y.; Xie,Z.; Liu,J.; Pang,Y.; Xie,L.; Luo,S.; Fan,Q.
EPI487641	PA	China	2008	A/chicken/Hong-Kong/NT155/2008		Other Database Import	Lam,T.T.Y.; Wang,J.; Shen,Y.; Zhou,B.; Duan,L.; Cheung,C.L.; Ma,C.; Lycett,S.J.; Leung,C.Y.H.; Chen,X.; Li,L.; Hong,W.; Chai,Y.; Zhou,L.; Liang,H.; Ou,Z.; Liu,Y.; Farooqui,A.; Kelvin,D.J.; Poon,L.L.M.; Smith,D.K.; Pybus,O.G.; Leung,G.M.; Shu,Y.; Webster,R.G.; Webby,R.J.; Peiris,J.S.M.; Rambaut,A.; Zhu,H.; Guan,Y.
EPI349858	PA	Vietnam	2008	A/chicken/Vietnam/NCVD-033/2008	National Centre of Veterinary Diagnostics	Centers for Disease Control and Prevention	Davis,Todd; Rivailler,Pierre; Nguyen,Tung
EPI350516	PA	Vietnam	2008	A/duck/Vietnam/NCVD-009/2008	National Centre of Veterinary Diagnostics	Centers for Disease Control and Prevention	Davis,Todd; Rivailler,Pierre; Nguyen,Tung
EPI177793	PA	Pakistan	2008-Jan-09	A/chicken/Pakistan/UDL-01/2008		Other Database Import
EPI349844	PA	Vietnam	2008-May-01	A/chicken/Vietnam/NCVD-03/2008	National Centre of Veterinary Diagnostics	Centers for Disease Control and Prevention	Davis,Todd; Rivailler,Pierre; Nguyen,Tung
EPI299287	PA	Japan	2008-Oct-08	A/avian/Japan/8KI0135/2008		Other Database Import	The NIAID Influenza Genome Sequencing Consortium
EPI1007371	PA	China	2008-Oct-09	A/duck/Hubei/S4170/2008		Other Database Import	Wang,G.; Deng,G.; Shi,J.; Luo,W.; Zhang,G.; Zhang,Q.; Liu,L.; Jiang,Y.; Li,C.; Sriwilaijaroen,N.; Hiramatsu,H.; Suzuki,Y.; Kawaoka,Y.; Chen,H.
EPI540307	PA	Bangladesh	2009-Dec-23	A/duck/Bangladesh/1574/2009	Institute of Epidemiology Disease Control and Research (IEDCR) & Bangladesh National Influenza Centre (NIC)	Centers for Disease Control and Prevention	Gerloff, Nancy; Simpson, Natosha; Davis, C. Todd
EPI350154	PA	Vietnam	2009	A/chicken/Vietnam/NCVD-390/2009	National Centre of Veterinary Diagnostics	Centers for Disease Control and Prevention	Davis,Todd; Rivailler,Pierre; Nguyen,Tung
EPI487473	PA	China	2009	A/duck/Jiangxi/8032/2009		Other Database Import	Lam,T.T.Y.; Wang,J.; Shen,Y.; Zhou,B.; Duan,L.; Cheung,C.L.; Ma,C.; Lycett,S.J.; Leung,C.Y.H.; Chen,X.; Li,L.; Hong,W.; Chai,Y.; Zhou,L.; Liang,H.; Ou,Z.; Liu,Y.; Farooqui,A.; Kelvin,D.J.; Poon,L.L.M.; Smith,D.K.; Pybus,O.G.; Leung,G.M.; Shu,Y.; Webster,R.G.; Webby,R.J.; Peiris,J.S.M.; Rambaut,A.; Zhu,H.; Guan,Y.
EPI350810	PA	Vietnam	2009	A/duck/Vietnam/NCVD-364/2009	National Centre of Veterinary Diagnostics	Centers for Disease Control and Prevention	Davis,Todd; Rivailler,Pierre; Nguyen,Tung
EPI350817	PA	Vietnam	2009	A/duck/Vietnam/NCVD-365/2009	National Centre of Veterinary Diagnostics	Centers for Disease Control and Prevention	Davis,Todd; Rivailler,Pierre; Nguyen,Tung
EPI350859	PA	Vietnam	2009	A/duck/Vietnam/NCVD-368/2009	National Centre of Veterinary Diagnostics	Centers for Disease Control and Prevention	Davis,Todd; Rivailler,Pierre; Nguyen,Tung
EPI350873	PA	Vietnam	2009	A/duck/Vietnam/NCVD-376/2009	National Centre of Veterinary Diagnostics	Centers for Disease Control and Prevention	Davis,Todd; Rivailler,Pierre; Nguyen,Tung
EPI351532	PA	Vietnam	2009	A/muscovy-duck/Vietnam/NCVD-384/2009	National Centre of Veterinary Diagnostics	Centers for Disease Control and Prevention	Davis,Todd; Rivailler,Pierre; Nguyen,Tung
EPI345598	PA	China	2009-Jun-01	A/duck/Eastern-China/10/2009		Other Database Import	Zhao,G.; Liu,X.
EPI500970	PA	China	2009-Mar-05	A/Duck/Guangdong/S1663/2009	Harbin Veterinary Research Institute (CAAS)	Harbin Veterinary Research Institute (CAAS)	Wang, G.J.; Deng,G.H.; Shi, J.Z.; Luo, W.Y.; Zhang, G.Q.; Zhang, Q.Y.; Liu, L.L.; Jiang, Y.P.; Li, C.J.; Sriwilaijaroen, N.; Hiramatsu, H.; Suzuki, Y.; Kawaoka, Y.; Chen, H.L.
EPI471870	PA	China	2009-Nov-14	A/duck/Guangxi/GXd-4/2009		Other Database Import	Xie,Z.; Zhou,C.; Peng,Y.; Liu,J.; Pang,Y.; Deng,X.; Xie,L.; Fan,Q.
EPI314011	PA	China	2009-Sep-10	A/duck/Tibet/S2/2009		Other Database Import	Suolang,S.; Jin,M.
EPI350474	PA	Vietnam	2010-Apr-01	A/chicken/Vietnam/NCVD-412/2010	National Centre of Veterinary Diagnostics	Centers for Disease Control and Prevention	Davis,Todd; Rivailler,Pierre; Nguyen,Tung
EPI1035778	PA	China	2010-Apr-08	A/duck/Guangxi/058/2010		Other Database Import	Li,M.; Xie,Z.X.; Xie,L.J.; Deng,X.W.; Xie,Q.Z.; Liu,J.B.; Fan,Q.; Pang,Y.S.; Luo,S.S.
EPI614269	PA	Georgia	2010-Apr-28	A/domestic-duck/Republic-of-Georgia/2/2010		Other Database Import	Wentworth,D.E.; Halpin,R.A.; Lin,X.; Simenauer,A.; Akopov,A.; Mohan,M.; Fedorova,N.; Tsitrin,T.; Puri,V.; Stockwell,T.; Amedeo,P.; Bishop,B.; Gupta,N.; Hoover,J.; Katzel,D.; Schobel,S.; Shrivastava,S.; Thovarai,V.; Bao,Y.; Sanders,R.; Zhdanov,S.; Kiryutin,B.; Lipman,D.J.; Tatusova,T.; Fouchier,R.A.M.
EPI501042	PA	China	2010-Dec-10	A/Duck/Guangxi/S4111/2010	Harbin Veterinary Research Institute (CAAS)	Harbin Veterinary Research Institute (CAAS)	Wang, G.J.; Deng,G.H.; Shi, J.Z.; Luo, W.Y.; Zhang, G.Q.; Zhang, Q.Y.; Liu, L.L.; Jiang, Y.P.; Li, C.J.; Sriwilaijaroen, N.; Hiramatsu, H.; Suzuki, Y.; Kawaoka, Y.; Chen, H.L.
EPI501098	PA	China	2010-Dec-10	A/Duck/Hunan/S4273/2010	Harbin Veterinary Research Institute (CAAS)	Harbin Veterinary Research Institute (CAAS)	Wang, G.J.; Deng,G.H.; Shi, J.Z.; Luo, W.Y.; Zhang, G.Q.; Zhang, Q.Y.; Liu, L.L.; Jiang, Y.P.; Li, C.J.; Sriwilaijaroen, N.; Hiramatsu, H.; Suzuki, Y.; Kawaoka, Y.; Chen, H.L.
EPI350168	PA	Vietnam	2010-Feb-01	A/chicken/Vietnam/NCVD-395/2010	National Centre of Veterinary Diagnostics	Centers for Disease Control and Prevention	Davis,Todd; Rivailler,Pierre; Nguyen,Tung
EPI383176	PA	China	2010-Feb-10	A/chicken/Jiangsu/k0402/2010		Other Database Import	Hu,J.; Zhao,K.; Liu,X.; Wang,X.; Chen,Z.
EPI487585	PA	China	2010	A/duck/Fujian/6390/2010		Other Database Import	Lam,T.T.Y.; Wang,J.; Shen,Y.; Zhou,B.; Duan,L.; Cheung,C.L.; Ma,C.; Lycett,S.J.; Leung,C.Y.H.; Chen,X.; Li,L.; Hong,W.; Chai,Y.; Zhou,L.; Liang,H.; Ou,Z.; Liu,Y.; Farooqui,A.; Kelvin,D.J.; Poon,L.L.M.; Smith,D.K.; Pybus,O.G.; Leung,G.M.; Shu,Y.; Webster,R.G.; Webby,R.J.; Peiris,J.S.M.; Rambaut,A.; Zhu,H.; Guan,Y.
EPI448075	PA	Bangladesh	2010-Jan-04	A/chicken/Bangladesh/1012/2010	Institute of Epidemiology Disease Control and Research (IEDCR) & Bangladesh National Influenza Centre (NIC)	Centers for Disease Control and Prevention	Gerloff, Nancy; Simpson, Natosha; Poh, Mee;Davis, Todd
EPI442008	PA	China	2010-Jan-27	A/goose/Guangdong/k0103/2010		Other Database Import	Zhao,K.; Gu,M.; Zhong,L.; Duan,Z.; Zhang,Y.; Zhu,Y.; Zhao,G.; Zhao,M.; Chen,Z.; Hu,S.; Liu,W.; Liu,X.; Peng,D.
EPI341455	PA	Cambodia	2010-Jan-28	A/chicken/Cambodia/TKCMB5T/2010		Other Database Import	Buchy,P.; Mardy,S.; San,S.
EPI504020	PA	Korea,-Republic-of	2010-Mar-01	A/wild-duck/SH38-64/2010		Other Database Import	Lee,K. J.; Choi,J. G.; Kang,H. M.; Song,B. M.; Lee,E. K.; Lee,H. S.; Lee,Y. J.
EPI500858	PA	China	2010-Mar-03	A/Chicken/Guangdong/S1312/2010	Harbin Veterinary Research Institute (CAAS)	Harbin Veterinary Research Institute (CAAS)	Wang, G.J.; Deng,G.H.; Shi, J.Z.; Luo, W.Y.; Zhang, G.Q.; Zhang, Q.Y.; Liu, L.L.; Jiang, Y.P.; Li, C.J.; Sriwilaijaroen, N.; Hiramatsu, H.; Suzuki, Y.; Kawaoka, Y.; Chen, H.L.
EPI1007171	PA	China	2010-Mar-05	A/chicken/Guangdong/S1453/2010		Other Database Import	Wang,G.; Deng,G.; Shi,J.; Luo,W.; Zhang,G.; Zhang,Q.; Liu,L.; Jiang,Y.; Li,C.; Sriwilaijaroen,N.; Hiramatsu,H.; Suzuki,Y.; Kawaoka,Y.; Chen,H.
EPI401605	PA	China	2010-May-08	A/duck/Guangxi/GXd-5/2010		Other Database Import	Xie,Z.; Xie,L.; Zhou,C.; Liu,J.; Pang,Y.; Deng,X.; Fan,Q.; Peng,Y.
EPI425556	PA	Vietnam	2010-Nov-01	A/duck/Vietnam/NCVD-645/2010	National Centre of Veterinary Diagnostics	Centers for Disease Control and Prevention
EPI471878	PA	China	2010-Nov-11	A/duck/Guangxi/GXd-6/2010		Other Database Import	Xie,Z.; Zhou,C.; Peng,Y.; Liu,J.; Pang,Y.; Deng,X.; Xie,L.; Fan,Q.
EPI348863	PA	Vietnam	2010-Nov-16	A/duck/Vietnam/NCVD-456/2010	National Institute of Hygiene and Epidemiology	Centers for Disease Control and Prevention	Davis,Todd; Rivailler,Pierre; Nguyen,Tung
EPI540355	PA	Bangladesh	2010-Oct-27	A/duck/Bangladesh/1766/2010	Institute of Epidemiology Disease Control and Research (IEDCR) & Bangladesh National Influenza Centre (NIC)	Centers for Disease Control and Prevention	Gerloff, Nancy; Simpson, Natosha; Davis, C. Todd
EPI424748	PA	Vietnam	2010-Oct-29	A/duck/Vietnam/NCVD-784/2010	National Centre of Veterinary Diagnostics	Centers for Disease Control and Prevention
EPI540529	PA	Bangladesh	2011-Apr-03	A/duck/Bangladesh/727/2011	Institute of Epidemiology Disease Control and Research (IEDCR) & Bangladesh National Influenza Centre (NIC)	Centers for Disease Control and Prevention	Gerloff, Nancy; Simpson, Natosha; Davis, C. Todd
EPI438986	PA	Vietnam	2011-Aug-04	A/duck/Vietnam/NCVD-935/2011	National Centre of Veterinary Diagnostics	Centers for Disease Control and Prevention
EPI387934	PA	Vietnam	2011-Dec-06	A/muscovy-duck/Vietnam/LBM66/2011		Other Database Import	Soda,K.; Hotta,K.; Nagai,Y.; Ito,T.; Mimura,W.
EPI401490	PA	Japan	2011-Feb-01	A/chicken/Aichi/2/2011		Other Database Import	Uchida,Y.; Suzuki,Y.; Shirakura,M.; Kawaguchi,A.; Nobusawa,E.; Tanikawa,T.; Hikono,H.; Takemae,N.; Mase,M.; Kanehira,K.; Hayashi,T.; Tagawa,Y.; Tashiro,M.; Saito,T.
EPI401472	PA	Japan	2011-Feb-01	A/chicken/Miyazaki/9/2011		Other Database Import	Uchida,Y.; Suzuki,Y.; Shirakura,M.; Kawaguchi,A.; Nobusawa,E.; Tanikawa,T.; Hikono,H.; Takemae,N.; Mase,M.; Kanehira,K.; Hayashi,T.; Tagawa,Y.; Tashiro,M.; Saito,T.
EPI401496	PA	Japan	2011-Feb-01	A/chicken/Wakayama/1/2011		Other Database Import	Uchida,Y.; Suzuki,Y.; Shirakura,M.; Kawaguchi,A.; Nobusawa,E.; Tanikawa,T.; Hikono,H.; Takemae,N.; Mase,M.; Kanehira,K.; Hayashi,T.; Tagawa,Y.; Tashiro,M.; Saito,T.
EPI448163	PA	Bangladesh	2011-Feb-07	A/crow/Bangladesh/316T/2011	Institute of Epidemiology Disease Control and Research (IEDCR) & Bangladesh National Influenza Centre (NIC)	Centers for Disease Control and Prevention	Gerloff, Nancy; Simpson, Natosha; Poh, Mee;Davis, Todd
EPI614257	PA	Georgia	2011-Feb-11	A/mallard/Republic-of-Georgia/12/2011		Other Database Import	Wentworth,D.E.; Halpin,R.A.; Lin,X.; Simenauer,A.; Akopov,A.; Mohan,M.; Fedorova,N.; Tsitrin,T.; Puri,V.; Stockwell,T.; Amedeo,P.; Bishop,B.; Gupta,N.; Hoover,J.; Katzel,D.; Schobel,S.; Shrivastava,S.; Thovarai,V.; Bao,Y.; Sanders,R.; Zhdanov,S.; Kiryutin,B.; Lipman,D.J.; Tatusova,T.; Fouchier,R.A.M.
EPI487561	PA	China	2011	A/common-teal/Hong-Kong/MPL1075/2011		Other Database Import	Lam,T.T.Y.; Wang,J.; Shen,Y.; Zhou,B.; Duan,L.; Cheung,C.L.; Ma,C.; Lycett,S.J.; Leung,C.Y.H.; Chen,X.; Li,L.; Hong,W.; Chai,Y.; Zhou,L.; Liang,H.; Ou,Z.; Liu,Y.; Farooqui,A.; Kelvin,D.J.; Poon,L.L.M.; Smith,D.K.; Pybus,O.G.; Leung,G.M.; Shu,Y.; Webster,R.G.; Webby,R.J.; Peiris,J.S.M.; Rambaut,A.; Zhu,H.; Guan,Y.
EPI425292	PA	Vietnam	2011	A/duck/Vietnam/NCVD-669/2011	National Centre of Veterinary Diagnostics	Centers for Disease Control and Prevention
EPI448219	PA	Bangladesh	2011-Jul-24	A/duck/Bangladesh/4124T/2011	Institute of Epidemiology Disease Control and Research (IEDCR) & Bangladesh National Influenza Centre (NIC)	Centers for Disease Control and Prevention	Gerloff, Nancy; Simpson, Natosha; Poh, Mee;Davis, Todd
EPI340435	PA	China	2011-Jun-01	A/duck/Zhejiang/0611-15/2011		Other Database Import	Wu,H.; Wu,N.
EPI425516	PA	Vietnam	2011-Jun-15	A/chicken/Vietnam/NCVD-780/2011	National Centre of Veterinary Diagnostics	Centers for Disease Control and Prevention
EPI401554	PA	Japan	2011-Mar-01	A/chicken/Chiba/2/2011		Other Database Import	Uchida,Y.; Suzuki,Y.; Shirakura,M.; Kawaguchi,A.; Nobusawa,E.; Tanikawa,T.; Hikono,H.; Takemae,N.; Mase,M.; Kanehira,K.; Hayashi,T.; Tagawa,Y.; Tashiro,M.; Saito,T.
EPI351704	PA	China	2011-Mar-01	A/chicken/Zhejiang/329/2011		Other Database Import	Wu,H.; Wu,N.
EPI448099	PA	Bangladesh	2011-Mar-20	A/duck/Bangladesh/1849/2011	Institute of Epidemiology Disease Control and Research (IEDCR) & Bangladesh National Influenza Centre (NIC)	Centers for Disease Control and Prevention	Gerloff, Nancy; Simpson, Natosha; Poh, Mee;Davis, Todd
EPI466310	PA	China	2011-May-21	A/chicken/Jiangsu/ZJDT/2011	Yangzhou University	Chinese Academy of Sciences	Daxin, P
EPI383209	PA	China	2011-Nov-29	A/chicken/Guangdong/C273/2011		Other Database Import	Jiao,P.; Yuan,R.; Wei,L.; Jia,B.; Cao,L.; Song,Y.; Gong,L.; Xu,C.; Ren,T.; Liao,M.
EPI574300	PA	Vietnam	2011-Oct-12	A/muscovy-duck/Vietnam/LBM21/2011		Other Database Import	Soda,K.; Hotta,K.; Trang,H.U.; Le,Q.M.; Yamashiro,T.; Ito,T.; Trang,U.H.
EPI487662	PA	China	2011-Sep-01	A/chicken/Hong-Kong/YU158/2011		Other Database Import	Lam,T.T.Y.; Wang,J.; Shen,Y.; Zhou,B.; Duan,L.; Cheung,C.L.; Ma,C.; Lycett,S.J.; Leung,C.Y.H.; Chen,X.; Li,L.; Hong,W.; Chai,Y.; Zhou,L.; Liang,H.; Ou,Z.; Liu,Y.; Farooqui,A.; Kelvin,D.J.; Poon,L.L.M.; Smith,D.K.; Pybus,O.G.; Leung,G.M.; Shu,Y.; Webster,R.G.; Webby,R.J.; Peiris,J.S.M.; Rambaut,A.; Zhu,H.; Guan,Y.
EPI703570	PA	China	2012-Dec-04	A/goose/Eastern-China/L1204/2012		Other Database Import	Sun,H.; Sun,Y.; Pu,J.; Liu,L.; Li,C.; Xu,G.; Qin,M.; Zhang,Y.; Zhao,H.; Wei,K.; Liu,J.
EPI540499	PA	Bangladesh	2012-Dec-15	A/poultry/Bangladesh/91354/2012	Institute of Epidemiology Disease Control and Research (IEDCR) & Bangladesh National Influenza Centre (NIC)	Centers for Disease Control and Prevention	Gerloff, Nancy; Simpson, Natosha; Davis, C. Todd
EPI510630	PA	Taiwan	2012-Dec-25	A/chicken/Taiwan/2437/2012		Other Database Import	Lee,C.C.; Zhu,H.; Huang,P.Y.; Peng,L.; Chang,Y.C.; Yip,C.H.; Li,Y.T.; Cheung,C.L.; Compans,R.; Yang,C.; Smith,D.K.; Lam,T.T.; King,C.C.; Guan,Y.; Lam,T.T.Y.
EPI812460	PA	Bhutan	2012-Feb-14	A/chicken/Bhutan/259/2012		Other Database Import	Franks,J.S.; Tenzin,S.; Tshering,D.; Rai,P.; Lhamo,K.; Dahal,N.; Dukpa,K.
EPI425388	PA	Vietnam	2012-Feb-16	A/duck/Vietnam/NCVD-1253/2012	National Centre of Veterinary Diagnostics	Centers for Disease Control and Prevention
EPI487799	PA	China	2012	A/chicken/Hong-Kong/YU150W/2012		Other Database Import	Lam,T.T.Y.; Wang,J.; Shen,Y.; Zhou,B.; Duan,L.; Cheung,C.L.; Ma,C.; Lycett,S.J.; Leung,C.Y.H.; Chen,X.; Li,L.; Hong,W.; Chai,Y.; Zhou,L.; Liang,H.; Ou,Z.; Liu,Y.; Farooqui,A.; Kelvin,D.J.; Poon,L.L.M.; Smith,D.K.; Pybus,O.G.; Leung,G.M.; Shu,Y.; Webster,R.G.; Webby,R.J.; Peiris,J.S.M.; Rambaut,A.; Zhu,H.; Guan,Y.
EPI487801	PA	China	2012	A/chicken/Hong-Kong/YU262W/2012		Other Database Import	Lam,T.T.Y.; Wang,J.; Shen,Y.; Zhou,B.; Duan,L.; Cheung,C.L.; Ma,C.; Lycett,S.J.; Leung,C.Y.H.; Chen,X.; Li,L.; Hong,W.; Chai,Y.; Zhou,L.; Liang,H.; Ou,Z.; Liu,Y.; Farooqui,A.; Kelvin,D.J.; Poon,L.L.M.; Smith,D.K.; Pybus,O.G.; Leung,G.M.; Shu,Y.; Webster,R.G.; Webby,R.J.; Peiris,J.S.M.; Rambaut,A.; Zhu,H.; Guan,Y.
EPI585444	PA	India	2012-Jan-04	A/chicken/India/01CA06/2012		Other Database Import	Nagarajan,S.; Syed,Z.; Tosh,C.; Murugkar,H.V.; Kumar,M.; Kulkarni,D.D.
EPI572867	PA	China	2012-Jul-03	A/chicken/Shanxi/0703/2012		Other Database Import	Pu,J.; Wang,S.; Yin,Y.; Zhang,G.; Carter,R.A.; Wang,J.; Xu,G.; Sun,H.; Wang,M.; Wen,C.; Wei,Y.; Wang,D.; Zhu,B.; Lemmon,G.; Jiao,Y.; Duan,S.; Wang,Q.; Du,Q.; Sun,M.; Bao,J.; Sun,Y.; Zhao,J.; Zhang,H.; Wu,G.; Liu,J.; Webster,R.G.; Lv,N.
EPI461032	PA	Vietnam	2012-Jul-28	A/duck/Vietnam/QB1207/2012		Other Database Import	Bui,V.N.; Dao,T.D.; Nguyen,L.T.; Nguyen,T.N.T.; Bui,A.N.; Trinh,D.Q.; Inui,K.; Runstadler,J.; Ogawa,H.; Nguyen,K.V.; Imai,K.; Nguyen,T.T.H.
EPI692543	PA	China	2012-Jun-05	A/duck/Jiangxi/S21055/2012		Other Database Import	Liang,L.; Deng,G.; Shi,J.; Wang,S.; Zhang,Q.; Kong,H.; Gu,C.; Guan,Y.; Suzuki,Y.; Li,Y.; Jiang,Y.; Tian,G.; Liu,L.; Li,C.; Chen,H.
EPI466382	PA	China	2012-Mar-24	A/chicken/Jiangsu/CZYWP/2012	Yangzhou University	Chinese Academy of Sciences	Daxin, P
EPI440909	PA	China	2012-Nov-17	A/chicken/Shaanxi/11/2012		Other Database Import	Ren,J.; Wang,J.
EPI540491	PA	Bangladesh	2012-Nov-29	A/avian/Bangladesh/91286/2012	Institute of Epidemiology Disease Control and Research (IEDCR) & Bangladesh National Influenza Centre (NIC)	Centers for Disease Control and Prevention	Gerloff, Nancy; Simpson, Natosha; Davis, C. Todd
EPI533885	PA	China	2012-Sep-07	A/duck/Guangxi/125D17/2012		Other Database Import	Wu,A.Q.; Xie,Z.X.; Xie,L.J.; Xie,Q.Z.; Luo,S.S.; Liu,J.B.; Deng,X.W.; Fan,Q.; Pang,Y.S.
EPI532268	PA	China	2013-Apr-01	A/chicken/Zhejiang/C481/2013		Other Database Import	Wu,H.; Wu,N.; Guo,C.; Li,L.
EPI649217	PA	China	2013-Apr-01	A/duck/Zhejiang/413/2013		Other Database Import	Wu,H.; Peng,X.; Cheng,L.; Lu,X.; Jin,C.; Xie,T.; Yao,H.; Wu,N.
EPI680736	PA	China	2013-Apr-08	A/pigeon/Zhejiang/P5/2013		Other Database Import	Wu,H.; Peng,X.; Cheng,L.; Lu,X.; Jin,C.; Xie,T.; Yao,H.; Wu,N.
EPI589828	PA	Vietnam	2013-Apr-13	A/muscovy-duck/Quang-Ninh/7c121/2013		Other Database Import	Soda,K.; Hotta,K.; Trang,H.U.; Le,Q.M.; Yamashiro,T.; Ito,T.
EPI457849	PA	China	2013-Apr-16	A/chicken/Jiangsu/SC537/2013	Harbin Veterinary Research Institute (CAAS)	Harbin Veterinary Research Institute (CAAS)	Zhang, Q.; Shi, J.; Deng, G.; Guo, J.; Zeng, X.; He, X.; Kong, H.; Gu, C.; Li, X.; Liu, J.; Wang, G.; Chen, Y.; Liu, L.; Liang, L.; Li, Y.; Fan, J.; Wang, J.; Li, W.; Guan, L.; Li, Q.; Yang, H.; Chen, P.; Jiang, L.; Guan, Y.; Xin, X.; Jiang, Y.; Tian, G.; Wang, X.; Qiao, C.; Li, C.; Bu, Z.; Chen, H.
EPI544891	PA	China	2013-Apr-25	A/duck/Shandong/Q1/2013		Other Database Import	Li,Q.
EPI544709	PA	China	2013-Apr-26	A/duck/Shanghai/SH3/2013		Other Database Import	Yang,D.; Liu,J.; Ju,H.; Ge,F.; Wang,J.; Li,X.; Liu,P.; Zhou,J.
EPI775056	PA	Vietnam	2013-Aug-13	A/chicken/DongNai/0182/2013		Other Database Import	Cao,B.V.; Le Ha,T.D.; Mai,V.N.; Dang Trinh,M.A.; Le Phan,K.N.; Vo Tran,N.T.; Hoang,T.
EPI591060	PA	China	2013-Aug-25	A/duck/Jiangxi/20189/2013		Other Database Import	Lam,T.Y.; Zhou,B.; Wang,J.; Chai,Y.; Shen,Y.; Chen,X.; Ma,C.; Hong,W.; Chen,Y.; Zhang,Y.; Duan,L.; Chen,P.; Jiang,J.; Li,L.; Poon,L.M.; Webby,R.J.; Smith,D.K.; Leung,G.M.; Peiris,J.M.; Holmes,E.C.; Guan,Y.; Zhu,H.
EPI598338	PA	China	2013-Dec-08	A/chicken/Jiangxi/31856/2013		Other Database Import	Ma,C.; Lam,T.T.Y.; Chai,Y.; Wang,J.; Fan,X.; Hong,W.; Zhang,Y.; Li,L.; Liu,Y.; Smith,D.K.; Webby,R.J.; Peiris,J.S.M.; Zhu,H.; Guan,Y.
EPI577067	PA	China	2013-Dec-11	A/chicken/Shenzhen/1098/2013		Other Database Import	Lam,T.Y.; Zhou,B.; Wang,J.; Chai,Y.; Shen,Y.; Chen,X.; Ma,C.; Hong,W.; Chen,Y.; Zhang,Y.; Duan,L.; Chen,P.; Jiang,J.; Li,L.; Poon,L.M.; Webby,R.J.; Smith,D.K.; Leung,G.M.; Peiris,J.M.; Holmes,E.C.; Guan,Y.; Zhu,H.
EPI577082	PA	China	2013-Dec-12	A/chicken/Shenzhen/1799/2013		Other Database Import	Lam,T.Y.; Zhou,B.; Wang,J.; Chai,Y.; Shen,Y.; Chen,X.; Ma,C.; Hong,W.; Chen,Y.; Zhang,Y.; Duan,L.; Chen,P.; Jiang,J.; Li,L.; Poon,L.M.; Webby,R.J.; Smith,D.K.; Leung,G.M.; Peiris,J.M.; Holmes,E.C.; Guan,Y.; Zhu,H.
EPI598633	PA	China	2013-Dec-15	A/duck/Jiangxi/33665/2013		Other Database Import	Ma,C.; Lam,T.T.Y.; Chai,Y.; Wang,J.; Fan,X.; Hong,W.; Zhang,Y.; Li,L.; Liu,Y.; Smith,D.K.; Webby,R.J.; Peiris,J.S.M.; Zhu,H.; Guan,Y.
EPI598636	PA	China	2013-Dec-15	A/duck/Jiangxi/33713/2013		Other Database Import	Ma,C.; Lam,T.T.Y.; Chai,Y.; Wang,J.; Fan,X.; Hong,W.; Zhang,Y.; Li,L.; Liu,Y.; Smith,D.K.; Webby,R.J.; Peiris,J.S.M.; Zhu,H.; Guan,Y.
EPI598355	PA	China	2013-Dec-15	A/duck/Jiangxi/33779/2013		Other Database Import	Ma,C.; Lam,T.T.Y.; Chai,Y.; Wang,J.; Fan,X.; Hong,W.; Zhang,Y.; Li,L.; Liu,Y.; Smith,D.K.; Webby,R.J.; Peiris,J.S.M.; Zhu,H.; Guan,Y.
EPI598574	PA	China	2013-Dec-15	A/migratory-duck/Jiangxi/33195/2013		Other Database Import	Ma,C.; Lam,T.T.Y.; Chai,Y.; Wang,J.; Fan,X.; Hong,W.; Zhang,Y.; Li,L.; Liu,Y.; Smith,D.K.; Webby,R.J.; Peiris,J.S.M.; Zhu,H.; Guan,Y.
EPI577124	PA	China	2013-Dec-18	A/chicken/Dongguan/2754/2013		Other Database Import	Lam,T.Y.; Zhou,B.; Wang,J.; Chai,Y.; Shen,Y.; Chen,X.; Ma,C.; Hong,W.; Chen,Y.; Zhang,Y.; Duan,L.; Chen,P.; Jiang,J.; Li,L.; Poon,L.M.; Webby,R.J.; Smith,D.K.; Leung,G.M.; Peiris,J.M.; Holmes,E.C.; Guan,Y.; Zhu,H.
EPI576720	PA	China	2013-Dec-18	A/silkie-chicken/Dongguan/3284/2013		Other Database Import	Lam,T.Y.; Zhou,B.; Wang,J.; Chai,Y.; Shen,Y.; Chen,X.; Ma,C.; Hong,W.; Chen,Y.; Zhang,Y.; Duan,L.; Chen,P.; Jiang,J.; Li,L.; Poon,L.M.; Webby,R.J.; Smith,D.K.; Leung,G.M.; Peiris,J.M.; Holmes,E.C.; Guan,Y.; Zhu,H.
EPI577134	PA	China	2013-Dec-19	A/chicken/Dongguan/3409/2013		Other Database Import	Lam,T.Y.; Zhou,B.; Wang,J.; Chai,Y.; Shen,Y.; Chen,X.; Ma,C.; Hong,W.; Chen,Y.; Zhang,Y.; Duan,L.; Chen,P.; Jiang,J.; Li,L.; Poon,L.M.; Webby,R.J.; Smith,D.K.; Leung,G.M.; Peiris,J.M.; Holmes,E.C.; Guan,Y.; Zhu,H.
EPI576766	PA	China	2013-Dec-19	A/chicken/Dongguan/3935/2013		Other Database Import	Lam,T.Y.; Zhou,B.; Wang,J.; Chai,Y.; Shen,Y.; Chen,X.; Ma,C.; Hong,W.; Chen,Y.; Zhang,Y.; Duan,L.; Chen,P.; Jiang,J.; Li,L.; Poon,L.M.; Webby,R.J.; Smith,D.K.; Leung,G.M.; Peiris,J.M.; Holmes,E.C.; Guan,Y.; Zhu,H.
EPI598695	PA	China	2013-Dec-29	A/chicken/Jiangxi/36223/2013		Other Database Import	Ma,C.; Lam,T.T.Y.; Chai,Y.; Wang,J.; Fan,X.; Hong,W.; Zhang,Y.; Li,L.; Liu,Y.; Smith,D.K.; Webby,R.J.; Peiris,J.S.M.; Zhu,H.; Guan,Y.
EPI838039	PA	China	2013	A/chicken/Sichuan/SIC8/2013		Other Database Import	Liu,Y.; Lai,H.; Li,L.; Chen,R.
EPI487824	PA	China	2013	A/chicken/Wenzhou/640/2013		Other Database Import	Lam,T.T.Y.; Wang,J.; Shen,Y.; Zhou,B.; Duan,L.; Cheung,C.L.; Ma,C.; Lycett,S.J.; Leung,C.Y.H.; Chen,X.; Li,L.; Hong,W.; Chai,Y.; Zhou,L.; Liang,H.; Ou,Z.; Liu,Y.; Farooqui,A.; Kelvin,D.J.; Poon,L.L.M.; Smith,D.K.; Pybus,O.G.; Leung,G.M.; Shu,Y.; Webster,R.G.; Webby,R.J.; Peiris,J.S.M.; Rambaut,A.; Zhu,H.; Guan,Y.
EPI898652	PA	Vietnam	2013-Jan-09	A/chicken/Vietnam/NCVD-2693/2013		Other Database Import	Davis,T.; Jang,Y.
EPI510621	PA	Taiwan	2013-Jan-10	A/duck/Taiwan/4376/2013		Other Database Import	Lee,C.C.; Zhu,H.; Huang,P.Y.; Peng,L.; Chang,Y.C.; Yip,C.H.; Li,Y.T.; Cheung,C.L.; Compans,R.; Yang,C.; Smith,D.K.; Lam,T.T.; King,C.C.; Guan,Y.; Lam,T.T.Y.
EPI466454	PA	China	2013-Jan-23	A/chicken/Jiangsu/ZJ4/2013	Yangzhou University	Chinese Academy of Sciences	Daxin, P
EPI1061015	PA	China	2013-Jul-07	A/duck/Zhejiang/7731/2013		Other Database Import	Wu,H.; Lu,R.; Peng,X.; Liu,F.; Cheng,L.; Wu,N.
EPI598949	PA	China	2013-Jul-10	A/duck/Wuxi/2/2013		Other Database Import	Ma,M.J.; Yang,X.X.; Qian,Y.H.; Zhao,S.Y.; Hua,S.; Wang,T.C.; Chen,S.H.; Ma,G.Y.; Sang,X.Y.; Liu,L.N.; Wu,A.P.; Jiang,T.J.; Gao,Y.W.; Gray,G.C.; Zhao,T.; Ling,X.; Wang,J.L.; Lu,B.; Qian,J.; Cao,W.C.; Ma,M. J.; Yang,X. X.; Cao,W. C.
EPI1061095	PA	China	2013-Jul-17	A/duck/Zhejiang/71731/2013		Other Database Import	Wu,H.; Lu,R.; Peng,X.; Liu,F.; Cheng,L.; Wu,N.
EPI1061096	PA	China	2013-Jul-17	A/duck/Zhejiang/71737/2013		Other Database Import	Wu,H.; Lu,R.; Peng,X.; Liu,F.; Cheng,L.; Wu,N.
EPI598440	PA	China	2013-Jul-21	A/chicken/Jiangxi/17403/2013		Other Database Import	Ma,C.; Lam,T.T.Y.; Chai,Y.; Wang,J.; Fan,X.; Hong,W.; Zhang,Y.; Li,L.; Liu,Y.; Smith,D.K.; Webby,R.J.; Peiris,J.S.M.; Zhu,H.; Guan,Y.
EPI471172	PA	Vietnam	2013-Jun-05	A/muscovy-duck/Vietnam/LBM436/2013		Other Database Import	Nakamura,Y.; Soda,K.; Hotta,K.; Lee,M.Q.; Ito,T.
EPI568777	PA	China	2013-Mar-07	A/chicken/Shandong/qd0307/2013		Other Database Import	Pu,J.; Wang,S.; Yin,Y.; Zhang,G.; Carter,R.A.; Wang,J.; Xu,G.; Sun,H.; Wang,M.; Wen,C.; Wei,Y.; Wang,D.; Zhu,B.; Lemmon,G.; Jiao,Y.; Duan,S.; Wang,Q.; Du,Q.; Sun,M.; Bao,J.; Sun,Y.; Zhao,J.; Zhang,H.; Wu,G.; Liu,J.; Webster,R.G.; Lv,N.
EPI530983	PA	China	2013-Nov-14	A/duck/Zhejiang/W24/2013		Other Database Import	Wu,H.; Peng,X.; Xu,L.; Jin,C.; Cheng,L.; Lu,X.; Xie,T.; Yao,H.; Wu,N.
EPI680760	PA	China	2013-Oct-16	A/chicken/Zhejiang/C46/2013		Other Database Import	Wu,H.; Peng,X.; Cheng,L.; Lu,X.; Jin,C.; Xie,T.; Yao,H.; Wu,N.
EPI534825	PA	China	2013-Oct-16	A/duck/Zhejiang/D16/2013		Other Database Import	Wu,H.; Wu,N.; Peng,X.; Jin,C.; Lu,X.; Cheng,L.; Yao,H.; Li,L.
EPI577320	PA	China	2013-Oct-20	A/chicken/Shaoxing/2414/2013		Other Database Import	Lam,T.Y.; Zhou,B.; Wang,J.; Chai,Y.; Shen,Y.; Chen,X.; Ma,C.; Hong,W.; Chen,Y.; Zhang,Y.; Duan,L.; Chen,P.; Jiang,J.; Li,L.; Poon,L.M.; Webby,R.J.; Smith,D.K.; Leung,G.M.; Peiris,J.M.; Holmes,E.C.; Guan,Y.; Zhu,H.
EPI577337	PA	China	2013-Oct-23	A/chicken/Wenzhou/3330/2013		Other Database Import	Lam,T.Y.; Zhou,B.; Wang,J.; Chai,Y.; Shen,Y.; Chen,X.; Ma,C.; Hong,W.; Chen,Y.; Zhang,Y.; Duan,L.; Chen,P.; Jiang,J.; Li,L.; Poon,L.M.; Webby,R.J.; Smith,D.K.; Leung,G.M.; Peiris,J.M.; Holmes,E.C.; Guan,Y.; Zhu,H.
EPI576786	PA	China	2013-Oct-24	A/chicken/Huzhou/3791/2013		Other Database Import	Lam,T.Y.; Zhou,B.; Wang,J.; Chai,Y.; Shen,Y.; Chen,X.; Ma,C.; Hong,W.; Chen,Y.; Zhang,Y.; Duan,L.; Chen,P.; Jiang,J.; Li,L.; Poon,L.M.; Webby,R.J.; Smith,D.K.; Leung,G.M.; Peiris,J.M.; Holmes,E.C.; Guan,Y.; Zhu,H.
EPI576821	PA	China	2013-Oct-24	A/chicken/Huzhou/4076/2013		Other Database Import	Lam,T.Y.; Zhou,B.; Wang,J.; Chai,Y.; Shen,Y.; Chen,X.; Ma,C.; Hong,W.; Chen,Y.; Zhang,Y.; Duan,L.; Chen,P.; Jiang,J.; Li,L.; Poon,L.M.; Webby,R.J.; Smith,D.K.; Leung,G.M.; Peiris,J.M.; Holmes,E.C.; Guan,Y.; Zhu,H.
EPI591192	PA	China	2013-Oct-29	A/chicken/Shaoxing/5493/2013		Other Database Import	Lam,T.Y.; Zhou,B.; Wang,J.; Chai,Y.; Shen,Y.; Chen,X.; Ma,C.; Hong,W.; Chen,Y.; Zhang,Y.; Duan,L.; Chen,P.; Jiang,J.; Li,L.; Poon,L.M.; Webby,R.J.; Smith,D.K.; Leung,G.M.; Peiris,J.M.; Holmes,E.C.; Guan,Y.; Zhu,H.
EPI591332	PA	China	2014-Apr-06	A/chicken/Jiangxi/13515/2014		Other Database Import	Lam,T.Y.; Zhou,B.; Wang,J.; Chai,Y.; Shen,Y.; Chen,X.; Ma,C.; Hong,W.; Chen,Y.; Zhang,Y.; Duan,L.; Chen,P.; Jiang,J.; Li,L.; Poon,L.M.; Webby,R.J.; Smith,D.K.; Leung,G.M.; Peiris,J.M.; Holmes,E.C.; Guan,Y.; Zhu,H.
EPI591380	PA	China	2014-Apr-06	A/chicken/Jiangxi/13543/2014		Other Database Import	Lam,T.Y.; Zhou,B.; Wang,J.; Chai,Y.; Shen,Y.; Chen,X.; Ma,C.; Hong,W.; Chen,Y.; Zhang,Y.; Duan,L.; Chen,P.; Jiang,J.; Li,L.; Poon,L.M.; Webby,R.J.; Smith,D.K.; Leung,G.M.; Peiris,J.M.; Holmes,E.C.; Guan,Y.; Zhu,H.
EPI1036024	PA	China	2014-Apr-14	A/pigeon/Guangxi/164/2014		Other Database Import	Li,M.; Xie,Z.X.; Xie,L.J.; Deng,X.W.; Xie,Q.Z.; Liu,J.B.; Fan,Q.; Pang,Y.S.; Luo,S.S.
EPI591445	PA	China	2014-Apr-16	A/chicken/Shantou/2556/2014		Other Database Import	Lam,T.Y.; Zhou,B.; Wang,J.; Chai,Y.; Shen,Y.; Chen,X.; Ma,C.; Hong,W.; Chen,Y.; Zhang,Y.; Duan,L.; Chen,P.; Jiang,J.; Li,L.; Poon,L.M.; Webby,R.J.; Smith,D.K.; Leung,G.M.; Peiris,J.M.; Holmes,E.C.; Guan,Y.; Zhu,H.
EPI591446	PA	China	2014-Apr-16	A/chicken/Shantou/2562/2014		Other Database Import	Lam,T.Y.; Zhou,B.; Wang,J.; Chai,Y.; Shen,Y.; Chen,X.; Ma,C.; Hong,W.; Chen,Y.; Zhang,Y.; Duan,L.; Chen,P.; Jiang,J.; Li,L.; Poon,L.M.; Webby,R.J.; Smith,D.K.; Leung,G.M.; Peiris,J.M.; Holmes,E.C.; Guan,Y.; Zhu,H.
EPI591392	PA	China	2014-Apr-20	A/chicken/Jiangxi/14479/2014		Other Database Import	Lam,T.Y.; Zhou,B.; Wang,J.; Chai,Y.; Shen,Y.; Chen,X.; Ma,C.; Hong,W.; Chen,Y.; Zhang,Y.; Duan,L.; Chen,P.; Jiang,J.; Li,L.; Poon,L.M.; Webby,R.J.; Smith,D.K.; Leung,G.M.; Peiris,J.M.; Holmes,E.C.; Guan,Y.; Zhu,H.
EPI683225	PA	China	2014-Dec-01	A/turtledove/Wuhan/WHBJ12/2014		Other Database Import	Chen,L. J.; Lin,X. D.; Guo,W. P.; Tian,J. H.; Zhang,Y. Z.
EPI969334	PA	Korea,-Republic-of	2014-Dec-02	A/wild-bird/Korea/SK14/2014		Other Database Import	Koo,B. S.; Yoon,S. W.
EPI845902	PA	Japan	2014-Dec-19	A/mandarin-duck/Gifu/2112D001/2014		Other Database Import	Usui,T.; Soda,K.; Tomioka,Y.; Okamura,M.; Ishihara,T.; Yano,M.; Yabuta,T.; Takakuwa,H.; Otsuki,K.; Ito,H.; Ito,T.; Yamaguchi,T.
EPI895329	PA	China	2014-Dec-22	A/Anser-fabalis/China/Anhui/L180/2014		Other Database Import	Ye,G.; Liang,C.H.; Ping,H.Y.; Hua,D.G.; Cheng,Y.Q.
EPI895345	PA	China	2014-Dec-22	A/Anser-fabalis/China/Anhui/L256/2014		Other Database Import	Ye,G.; Liang,C.H.; Ping,H.Y.; Hua,D.G.; Cheng,Y.Q.
EPI561642	PA	Korea,-Republic-of	2014-Feb-01	A/bean-goose/Korea/H328/2014		Other Database Import	Jeong,J.; Kang,H.M.; Lee,E.K.; Song,B.M.; Kwon,Y.K.; Kim,H.R.; Choi,K.S.; Kim,J.Y.; Lee,H.J.; Moon,O.K.; Jeong,W.; Choi,J.; Baek,J.H.; Joo,Y.S.; Park,Y.H.; Lee,H.S.; Lee,Y.J.; Lee,Y. J.; Kang,H. M.; Lee,E. K.; Song,B. M.; Lee,K. J.; Hong,M. S.
EPI703574	PA	China	2014-Feb-15	A/duck/Eastern-China/S0215/2014		Other Database Import	Sun,H.; Sun,Y.; Pu,J.; Liu,L.; Li,C.; Xu,G.; Qin,M.; Zhang,Y.; Zhao,H.; Wei,K.; Liu,J.
EPI577288	PA	China	2014-Feb-18	A/chicken/Jiangxi/10953/2014		Other Database Import	Lam,T.Y.; Zhou,B.; Wang,J.; Chai,Y.; Shen,Y.; Chen,X.; Ma,C.; Hong,W.; Chen,Y.; Zhang,Y.; Duan,L.; Chen,P.; Jiang,J.; Li,L.; Poon,L.M.; Webby,R.J.; Smith,D.K.; Leung,G.M.; Peiris,J.M.; Holmes,E.C.; Guan,Y.; Zhu,H.
EPI577294	PA	China	2014-Feb-18	A/chicken/Jiangxi/10961/2014		Other Database Import	Lam,T.Y.; Zhou,B.; Wang,J.; Chai,Y.; Shen,Y.; Chen,X.; Ma,C.; Hong,W.; Chen,Y.; Zhang,Y.; Duan,L.; Chen,P.; Jiang,J.; Li,L.; Poon,L.M.; Webby,R.J.; Smith,D.K.; Leung,G.M.; Peiris,J.M.; Holmes,E.C.; Guan,Y.; Zhu,H.
EPI577513	PA	China	2014-Feb-20	A/chicken/Dongguan/749/2014		Other Database Import	Lam,T.Y.; Zhou,B.; Wang,J.; Chai,Y.; Shen,Y.; Chen,X.; Ma,C.; Hong,W.; Chen,Y.; Zhang,Y.; Duan,L.; Chen,P.; Jiang,J.; Li,L.; Poon,L.M.; Webby,R.J.; Smith,D.K.; Leung,G.M.; Peiris,J.M.; Holmes,E.C.; Guan,Y.; Zhu,H.
EPI577525	PA	China	2014-Feb-20	A/chicken/Dongguan/836/2014		Other Database Import	Lam,T.Y.; Zhou,B.; Wang,J.; Chai,Y.; Shen,Y.; Chen,X.; Ma,C.; Hong,W.; Chen,Y.; Zhang,Y.; Duan,L.; Chen,P.; Jiang,J.; Li,L.; Poon,L.M.; Webby,R.J.; Smith,D.K.; Leung,G.M.; Peiris,J.M.; Holmes,E.C.; Guan,Y.; Zhu,H.
EPI577373	PA	China	2014-Feb-20	A/chicken/Dongguan/856/2014		Other Database Import	Lam,T.Y.; Zhou,B.; Wang,J.; Chai,Y.; Shen,Y.; Chen,X.; Ma,C.; Hong,W.; Chen,Y.; Zhang,Y.; Duan,L.; Chen,P.; Jiang,J.; Li,L.; Poon,L.M.; Webby,R.J.; Smith,D.K.; Leung,G.M.; Peiris,J.M.; Holmes,E.C.; Guan,Y.; Zhu,H.
EPI528350	PA	China	2014-Feb-20	A/Chicken/Jilin/13199/2014	WHO Chinese National Influenza Center	WHO Chinese National Influenza Center	Wang,Dayan;Gao,Rongbao;Yang,Lei;Zhou,Shumei;Li,Xiyan;Zhou,Jianfang;Zhu,Wenfei;Guo,Junfeng;Li,Xiaodan;Dong,Jie;Huang,Weijuan;Zhang,Ye;Dong,Libo;Zhao,Xiang;Lu,Jian;Lan,Yu;Shu,Yuelong
EPI898447	PA	Vietnam	2014-Feb-20	A/chicken/Vietnam/NCVD14-A461/2014		Other Database Import	Davis,T.; Jang,Y.
EPI577806	PA	China	2014-Feb-21	A/chicken/Dongguan/1415/2014		Other Database Import	Lam,T.Y.; Zhou,B.; Wang,J.; Chai,Y.; Shen,Y.; Chen,X.; Ma,C.; Hong,W.; Chen,Y.; Zhang,Y.; Duan,L.; Chen,P.; Jiang,J.; Li,L.; Poon,L.M.; Webby,R.J.; Smith,D.K.; Leung,G.M.; Peiris,J.M.; Holmes,E.C.; Guan,Y.; Zhu,H.
EPI577473	PA	China	2014-Feb-21	A/chicken/Dongguan/1523/2014		Other Database Import	Lam,T.Y.; Zhou,B.; Wang,J.; Chai,Y.; Shen,Y.; Chen,X.; Ma,C.; Hong,W.; Chen,Y.; Zhang,Y.; Duan,L.; Chen,P.; Jiang,J.; Li,L.; Poon,L.M.; Webby,R.J.; Smith,D.K.; Leung,G.M.; Peiris,J.M.; Holmes,E.C.; Guan,Y.; Zhu,H.
EPI837635	PA	China	2014-Feb-26	A/migratory-waterfowl/Hubei/Chenhu1347/2014		Other Database Import	Bi,Y.; Liu,H.; Xiong,C.; Di,Liu.; Shi,W.; Li,M.; Liu,S.; Chen,J.; Chen,G.; Li,Y.; Yang,G.; Lei,Y.; Xiong,Y.; Lei,F.; Wang,H.; Chen,Q.; Gao,G.F.
EPI599051	PA	China	2014-Jan-05	A/chicken/Jiangxi/1244/2014		Other Database Import	Ma,C.; Lam,T.T.Y.; Chai,Y.; Wang,J.; Fan,X.; Hong,W.; Zhang,Y.; Li,L.; Liu,Y.; Smith,D.K.; Webby,R.J.; Peiris,J.S.M.; Zhu,H.; Guan,Y.
EPI568409	PA	China	2014-Jan-05	A/chicken/Jiangxi/1271/2014		Other Database Import	Ma,C.; Lam,T.T.Y.; Chai,Y.; Wang,J.; Fan,X.; Hong,W.; Zhang,Y.; Li,L.; Liu,Y.; Smith,D.K.; Webby,R.J.; Peiris,J.S.M.; Zhu,H.; Guan,Y.
EPI652794	PA	China	2014-Jan-10	A/chicken/Qingdao/014/2014		Other Database Import	Wang,K.; Zhuang,Q.; Chen,J.
EPI599058	PA	China	2014-Jan-12	A/chicken/Jiangxi/3119/2014		Other Database Import	Ma,C.; Lam,T.T.Y.; Chai,Y.; Wang,J.; Fan,X.; Hong,W.; Zhang,Y.; Li,L.; Liu,Y.; Smith,D.K.; Webby,R.J.; Peiris,J.S.M.; Zhu,H.; Guan,Y.
EPI598623	PA	China	2014-Jan-12	A/chicken/Jiangxi/3152/2014		Other Database Import	Ma,C.; Lam,T.T.Y.; Chai,Y.; Wang,J.; Fan,X.; Hong,W.; Zhang,Y.; Li,L.; Liu,Y.; Smith,D.K.; Webby,R.J.; Peiris,J.S.M.; Zhu,H.; Guan,Y.
EPI509693	PA	Korea,-Republic-of	2014-Jan-17	A/broiler-duck/Korea/Buan2/2014		Other Database Import	Lee,Y. J.; Kang,H. M.; Lee,E. K.; Song,B. M.; Jeong,J.; Kwon,Y. K.; Kim,H. R.; Lee,K. J.; Hong,M. S.; Jang,I.; Choi,K. S.; Kim,J. Y.; Lee,H. J.; Kang,M. S.; Jeong,O. M.; Baek,J. H.; Joo,Y. S.; Park,Y.Ho.; Lee,H. S.; Park,Y.H.
EPI672773	PA	China	2014-Jan-20	A/wildfowl/China/472/2014	Institute of Poultry Science, Shandong, Academy of Agricultural Science	South China Agricultural University	Wang, Youling
EPI561534	PA	Korea,-Republic-of	2014-Jan-22	A/Baikal-teal/Korea/H68/2014		Other Database Import	Jeong,J.; Kang,H.M.; Lee,E.K.; Song,B.M.; Kwon,Y.K.; Kim,H.R.; Choi,K.S.; Kim,J.Y.; Lee,H.J.; Moon,O.K.; Jeong,W.; Choi,J.; Baek,J.H.; Joo,Y.S.; Park,Y.H.; Lee,H.S.; Lee,Y.J.; Lee,Y. J.; Kang,H. M.; Lee,E. K.; Song,B. M.; Lee,K. J.; Hong,M. S.
EPI561582	PA	Korea,-Republic-of	2014-Jan-25	A/breeder-duck/Korea/H128/2014		Other Database Import	Jeong,J.; Kang,H.M.; Lee,E.K.; Song,B.M.; Kwon,Y.K.; Kim,H.R.; Choi,K.S.; Kim,J.Y.; Lee,H.J.; Moon,O.K.; Jeong,W.; Choi,J.; Baek,J.H.; Joo,Y.S.; Park,Y.H.; Lee,H.S.; Lee,Y.J.; Lee,Y. J.; Kang,H. M.; Lee,E. K.; Song,B. M.; Lee,K. J.; Hong,M. S.
EPI561583	PA	Korea,-Republic-of	2014-Jan-25	A/broiler-duck/Korea/H133/2014		Other Database Import	Jeong,J.; Kang,H.M.; Lee,E.K.; Song,B.M.; Kwon,Y.K.; Kim,H.R.; Choi,K.S.; Kim,J.Y.; Lee,H.J.; Moon,O.K.; Jeong,W.; Choi,J.; Baek,J.H.; Joo,Y.S.; Park,Y.H.; Lee,H.S.; Lee,Y.J.; Lee,Y. J.; Kang,H. M.; Lee,E. K.; Song,B. M.; Lee,K. J.; Hong,M. S.
EPI647456	PA	China	2014-Jul-01	A/chicken/Zhejiang/727031/2014		Other Database Import	Wu,H.; Peng,X.; Cheng,L.; Wu,N.
EPI681085	PA	China	2014-Jul-07	A/chicken/Zhejiang/77082/2014		Other Database Import	Wu,H.; Peng,X.; Cheng,L.; Lu,X.; Jin,C.; Xie,T.; Yao,H.; Wu,N.
EPI649202	PA	China	2014-Jul-07	A/duck/Zhejiang/77127/2014		Other Database Import	Wu,H.; Peng,X.; Cheng,L.; Lu,X.; Jin,C.; Xie,T.; Yao,H.; Wu,N.
EPI681252	PA	China	2014-Jul-07	A/goose/Zhejiang/77167/2014		Other Database Import	Wu,H.; Peng,X.; Cheng,L.; Lu,X.; Jin,C.; Xie,T.; Yao,H.; Wu,N.
EPI681079	PA	China	2014-Jul-07	A/pigeon/Zhejiang/77037/2014		Other Database Import	Wu,H.; Peng,X.; Cheng,L.; Lu,X.; Jin,C.; Xie,T.; Yao,H.; Wu,N.
EPI681267	PA	China	2014-Jul-27	A/chicken/Zhejiang/727155/2014		Other Database Import	Wu,H.; Peng,X.; Cheng,L.; Lu,X.; Jin,C.; Xie,T.; Yao,H.; Wu,N.
EPI681257	PA	China	2014-Jul-27	A/goose/Zhejiang/727092/2014		Other Database Import	Wu,H.; Peng,X.; Cheng,L.; Lu,X.; Jin,C.; Xie,T.; Yao,H.; Wu,N.
EPI681080	PA	China	2014-Jul-27	A/pigeon/Zhejiang/727044/2014		Other Database Import	Wu,H.; Peng,X.; Cheng,L.; Lu,X.; Jin,C.; Xie,T.; Yao,H.; Wu,N.
EPI585721	PA	China	2014-Jun-01	A/swan-goose/Jilin/JL01/2014		Other Database Import	Yu,Z.; Wang,T.; Gao,X.; Gao,Y.; Xia,X.
EPI591467	PA	China	2014-Jun-07	A/chicken/Jiangxi/17989/2014		Other Database Import	Lam,T.Y.; Zhou,B.; Wang,J.; Chai,Y.; Shen,Y.; Chen,X.; Ma,C.; Hong,W.; Chen,Y.; Zhang,Y.; Duan,L.; Chen,P.; Jiang,J.; Li,L.; Poon,L.M.; Webby,R.J.; Smith,D.K.; Leung,G.M.; Peiris,J.M.; Holmes,E.C.; Guan,Y.; Zhu,H.
EPI644465	PA	China	2014-Mar-01	A/chicken/Zhejiang/2C66/2014		Other Database Import	Wu,H.; Lu,R.; Wu,X.; Peng,X.; Xu,L.; Cheng,L.; Lu,X.; Jin,C.; Xie,T.; Yao,H.; Wu,N.
EPI591194	PA	China	2014-Mar-16	A/chicken/Jiangxi/12210/2014		Other Database Import	Lam,T.Y.; Zhou,B.; Wang,J.; Chai,Y.; Shen,Y.; Chen,X.; Ma,C.; Hong,W.; Chen,Y.; Zhang,Y.; Duan,L.; Chen,P.; Jiang,J.; Li,L.; Poon,L.M.; Webby,R.J.; Smith,D.K.; Leung,G.M.; Peiris,J.M.; Holmes,E.C.; Guan,Y.; Zhu,H.
EPI591197	PA	China	2014-Mar-16	A/chicken/Jiangxi/12221/2014		Other Database Import	Lam,T.Y.; Zhou,B.; Wang,J.; Chai,Y.; Shen,Y.; Chen,X.; Ma,C.; Hong,W.; Chen,Y.; Zhang,Y.; Duan,L.; Chen,P.; Jiang,J.; Li,L.; Poon,L.M.; Webby,R.J.; Smith,D.K.; Leung,G.M.; Peiris,J.M.; Holmes,E.C.; Guan,Y.; Zhu,H.
EPI591310	PA	China	2014-Mar-16	A/chicken/Jiangxi/12243/2014		Other Database Import	Lam,T.Y.; Zhou,B.; Wang,J.; Chai,Y.; Shen,Y.; Chen,X.; Ma,C.; Hong,W.; Chen,Y.; Zhang,Y.; Duan,L.; Chen,P.; Jiang,J.; Li,L.; Poon,L.M.; Webby,R.J.; Smith,D.K.; Leung,G.M.; Peiris,J.M.; Holmes,E.C.; Guan,Y.; Zhu,H.
EPI598580	PA	China	2014-Mar-30	A/chicken/Jiangxi/13202/2014		Other Database Import	Ma,C.; Lam,T.T.Y.; Chai,Y.; Wang,J.; Fan,X.; Hong,W.; Zhang,Y.; Li,L.; Liu,Y.; Smith,D.K.; Webby,R.J.; Peiris,J.S.M.; Zhu,H.; Guan,Y.
EPI568363	PA	China	2014-Mar-30	A/chicken/Jiangxi/13217/2014		Other Database Import	Ma,C.; Lam,T.T.Y.; Chai,Y.; Wang,J.; Fan,X.; Hong,W.; Zhang,Y.; Li,L.; Liu,Y.; Smith,D.K.; Webby,R.J.; Peiris,J.S.M.; Zhu,H.; Guan,Y.
EPI591241	PA	China	2014-Mar-30	A/chicken/Jiangxi/13230/2014		Other Database Import	Lam,T.Y.; Zhou,B.; Wang,J.; Chai,Y.; Shen,Y.; Chen,X.; Ma,C.; Hong,W.; Chen,Y.; Zhang,Y.; Duan,L.; Chen,P.; Jiang,J.; Li,L.; Poon,L.M.; Webby,R.J.; Smith,D.K.; Leung,G.M.; Peiris,J.M.; Holmes,E.C.; Guan,Y.; Zhu,H.
EPI568367	PA	China	2014-Mar-30	A/chicken/Jiangxi/13238/2014		Other Database Import	Ma,C.; Lam,T.T.Y.; Chai,Y.; Wang,J.; Fan,X.; Hong,W.; Zhang,Y.; Li,L.; Liu,Y.; Smith,D.K.; Webby,R.J.; Peiris,J.S.M.; Zhu,H.; Guan,Y.
EPI568371	PA	China	2014-Mar-30	A/chicken/Jiangxi/13249/2014		Other Database Import	Ma,C.; Lam,T.T.Y.; Chai,Y.; Wang,J.; Fan,X.; Hong,W.; Zhang,Y.; Li,L.; Liu,Y.; Smith,D.K.; Webby,R.J.; Peiris,J.S.M.; Zhu,H.; Guan,Y.
EPI568376	PA	China	2014-Mar-30	A/chicken/Jiangxi/13274/2014		Other Database Import	Ma,C.; Lam,T.T.Y.; Chai,Y.; Wang,J.; Fan,X.; Hong,W.; Zhang,Y.; Li,L.; Liu,Y.; Smith,D.K.; Webby,R.J.; Peiris,J.S.M.; Zhu,H.; Guan,Y.
EPI965075	PA	Bangladesh	2014-Nov-16	A/duck/Bangladesh/23858/2014		Other Database Import	Marinova Petkova,A.; Shanmuganatham,K.; Feeroz,M.M.; Jones Engel,L.; Hasan,M.K.; Akhtar,S.; Turner,J.; Walker,D.; Seiler,P.; Franks,J.; McKenzie,P.; Krauss,S.; Webby,R.J.; Webster,R.G.; Hasan,K.; Seiler,J.
EPI1061011	PA	China	2014-Nov-20	A/goose/Zhejiang/1120078/2014		Other Database Import	Wu,H.; Lu,R.; Peng,X.; Liu,F.; Cheng,L.; Wu,N.
EPI1061013	PA	China	2014-Nov-20	A/goose/Zhejiang/1120084/2014		Other Database Import	Wu,H.; Lu,R.; Peng,X.; Liu,F.; Cheng,L.; Wu,N.
EPI681244	PA	China	2014-Nov-20	A/goose/Zhejiang/112071/2014		Other Database Import	Wu,H.; Peng,X.; Cheng,L.; Lu,X.; Jin,C.; Xie,T.; Yao,H.; Wu,N.
EPI580274	PA	China	2014-Nov-30	A/Chicken/Guangdong/DG479/2014	South China Agricultural University	South China Agricultural University	Shumin,Xie;Weixin,Jia;Yicun,Lin;Kaixiang,Xing;Xingxing,Ren;Wenbao,Qi;Ming,Liao
EPI736690	PA	China	2014-Oct-12	A/duck/Guizhou/013/2014		Other Database Import	Duan,Z.; Chen,J.; Ji,X.; Xu,H.; Ruan,Y.; Zhao,J.
EPI596609	PA	Vietnam	2014-Oct-13	A/duck/Vietnam/LBM758/2014		Other Database Import	Soda,K.; Hotta,K.; Trang,H.U.; Le,Q.M.; Yamashiro,T.; Ito,T.
EPI596585	PA	Vietnam	2014-Oct-13	A/muscovy-duck/Vietnam/LBM754/2014		Other Database Import	Soda,K.; Hotta,K.; Trang,H.U.; Le,Q.M.; Yamashiro,T.; Ito,T.
EPI839146	PA	China	2014-Sep-08	A/Gallinula-chloropus/Guangdong/GZ174/2014		Other Database Import	Kang,Y.; Feng,M.; Ren,T.
EPI681093	PA	China	2014-Sep-25	A/chicken/Zhejiang/925134/2014		Other Database Import	Wu,H.; Peng,X.; Cheng,L.; Lu,X.; Jin,C.; Xie,T.; Yao,H.; Wu,N.
EPI681261	PA	China	2014-Sep-25	A/goose/Zhejiang/925106/2014		Other Database Import	Wu,H.; Peng,X.; Cheng,L.; Lu,X.; Jin,C.; Xie,T.; Yao,H.; Wu,N.
EPI760212	PA	China	2015-Apr-06	A/duck/Hunan/161/2015		Other Database Import	Li,X.; Yang,J.; Liu,B.; Jia,Y.; Guo,J.; Gao,X.; Weng,S.; Yang,M.; Wang,L.; Wang,L.F.; Cui,J.; Chen,H.; Zhu,Q.
EPI1060782	PA	Hong-Kong-(SAR)	2015-Apr-30	A/oriental-magpie-robin/HK/6154/2015		Other Database Import	Hui,P.Y.; Chan,L.Y.; Kuok,I.T.; Mok,K.P.; Yang,Z.; Li,R.; Luk,S.M.; Lee,F.; Yen,H.L.; Zhu,H.; Guan,Y.; Nicholls,J.; Peiris,M.; Chan,C.W.
EPI965275	PA	Bangladesh	2015-Aug-25	A/quail/Bangladesh/25987/2015		Other Database Import	Barman,S.; Marinova Petkova,A.; Hasan,M.K.; Akhtar,S.; Turner,J.C.; Franks,J.; Walker,D.; Seiler,P.; Friedman,K.; Kercher,L.; Kayali,G.; Jones Engel,L.; McKenzie,P.; Krauss,S.; Webby,R.J.; Feeroz,M.M.; Webster,R.G.
EPI693705	PA	Mongolia	2015-Aug-30	A/duck/Mongolia/83/2015		Other Database Import	Matsuno,K.; Okamatsu,M.; Kida,H.; Sakoda,Y.; Matuno,K.; Hatamachi,J.
EPI895194	PA	China	2015-Dec-12	A/chicken/Ganzhou/GZ27/2015		Other Database Import	Chen,L.J.; Tian,J.H.; Lin,X.D.; Liao,Y.; Shi,M.; Zhang,Y.Z.
EPI683242	PA	China	2015	A/chicken/Wenzhou/RAQL01/2015		Other Database Import	Chen,L. J.; Lin,X. D.; Guo,W. P.; Tian,J. H.; Zhang,Y. Z.
EPI683226	PA	China	2015	A/turtledove/Wuhan/HKBJ43/2015		Other Database Import	Chen,L. J.; Lin,X. D.; Guo,W. P.; Tian,J. H.; Zhang,Y. Z.
EPI775080	PA	Vietnam	2015-Jan-06	A/duck/CaMau/0237/2015		Other Database Import	Cao,B.V.; Le Ha,T.D.; Mai,V.N.; Dang Trinh,M.A.; Le Phan,K.N.; Vo Tran,N.T.; Hoang,T.
EPI775088	PA	Vietnam	2015-Jan-06	A/duck/CaMau/0238/2015		Other Database Import	Cao,B.V.; Le Ha,T.D.; Mai,V.N.; Dang Trinh,M.A.; Le Phan,K.N.; Vo Tran,N.T.; Hoang,T.
EPI590460	PA	Taiwan	2015-Jan-15	A/chicken/PT/a158/2015		Other Database Import	Cheng,M. C.; Tan,D. H.; Chen,L. H.; Liu,Y. P.; Lin,Y. J.; Tsai,H. J.; Chang,P. C.
EPI690543	PA	Taiwan	2015-Jan-17	A/goose/Taiwan/TNC4/2015		Other Database Import	Huang,P.Y.; Lee,C.D.; Yip,C.H.; Cheung,C.L.; Yu,G.; Lam,T.T.; Smith,D.K.; Zhu,H.; Guan,Y.; Lee,C.C.; Lam,T.Y.
EPI690719	PA	Taiwan	2015-Jan-17	A/goose/Taiwan/TNO12/2015		Other Database Import	Huang,P.Y.; Lee,C.D.; Yip,C.H.; Cheung,C.L.; Yu,G.; Lam,T.T.; Smith,D.K.; Zhu,H.; Guan,Y.; Lee,C.C.; Lam,T.Y.
EPI946749	PA	Japan	2015-Jul-07	A/chicken/Japan/AQ-HE61/2015		Other Database Import	Shibata,A.; Hiono,T.; Okamatsu,M.; Osaka,H.; Sakoda,Y.
EPI965237	PA	Bangladesh	2015-Jul-10	A/duck/Bangladesh/25891/2015		Other Database Import	Barman,S.; Marinova Petkova,A.; Hasan,M.K.; Akhtar,S.; Turner,J.C.; Franks,J.; Walker,D.; Seiler,P.; Friedman,K.; Kercher,L.; Kayali,G.; Jones Engel,L.; McKenzie,P.; Krauss,S.; Webby,R.J.; Feeroz,M.M.; Webster,R.G.
EPI729793	PA	China	2015-May-01	A/chicken/Shanghai/06/2015		Other Database Import	Ge,F.
EPI641378	PA	China	2015-May-05	A/chicken/Shandong/1167/2015		Other Database Import	Tan,L.; Xu,C.T.; Zhao,X.; Huang,Q.; Huang,Y.; Zhu,F.; Gao,D.; Zhang,L.; Yang,S.; Zhang,X.
EPI753512	PA	China	2015-May-14	A/chicken/Zhejiang/514132/2015		Other Database Import	Wu,H.; Lu,R.; Peng,X.; Cheng,L.; Jin,C.; Lu,X.; Xie,T.; Yao,H.; Wu,N.
EPI895193	PA	China	2016-Feb-19	A/chicken/Taishun/TS2/2016		Other Database Import	Chen,L.J.; Tian,J.H.; Lin,X.D.; Liao,Y.; Shi,M.; Zhang,Y.Z.

## Sheet: HA-H5
Table S1. GISAID acknowledgements for HA segment.
Isolate ID	Segment	Country	Collection date	Isolate name	Originating Laboratory	Submitting Laboratory	Authors
EPI5789	HA	China	1996	A/Goose/Guangdong/1/96		Other Database Import
EPI152348	HA	Hong Kong (SAR)	1997	A/Hong Kong/156/97		Other Database Import
EPI239030	HA	Hong Kong (SAR)	1997	A/Hong Kong/483/1997		Other Database Import	Kim,L.M.; Scott,M.A.; Suarez,D.L.; Spackman,E.; Swayne,D.E.; Afonso,C.L.
EPI10267	HA	Hong_Kong_(SAR)	2001	A/Chicken/Hong_Kong/FY77/01		Other Database Import
EPI20520	HA	Hong_Kong_(SAR)	2002	A/Ck/HK/61.9/02		Other Database Import
EPI22793	HA	China	2002	A/Ck/HK/YU22/2002		Other Database Import
EPI235867	HA	China	2002	A/duck/Hubei/wg/2002		Other Database Import	Liao,X.; Zhang,X.; Wang,J.; Yu,J.; Li,T.
EPI135862	HA	China	2002	A/duck/Hunan/795/2002		Other Database Import
EPI235171	HA	China	2003	A/goose/Fujian/bb/2003		Other Database Import	Liao,X.; Zhang,X.; Wang,J.; Yu,J.; Liu,J.
EPI116501	HA	China	2003	A/Hong Kong/213/2003		Other Database Import
EPI25072	HA	China	2004	A/blackbird/Hunan/1/2004		Other Database Import
EPI275718	HA	China	2004	A/chicken/Anhui/39/2004		Other Database Import	Li,Y.; Shi,J.; Zhong,G.; Deng,G.; Tian,G.; Ge,J.; Zeng,X.; Song,J.; Zhao,D.; Liu,L.; Jiang,Y.; Guan,Y.; Bu,Z.; Chen,H.
EPI275734	HA	China	2004	A/chicken/Gansu/44/2004		Other Database Import	Li,Y.; Shi,J.; Zhong,G.; Deng,G.; Tian,G.; Ge,J.; Zeng,X.; Song,J.; Zhao,D.; Liu,L.; Jiang,Y.; Guan,Y.; Bu,Z.; Chen,H.
EPI275782	HA	China	2004	A/chicken/Hunan/41/2004		Other Database Import	Li,Y.; Shi,J.; Zhong,G.; Deng,G.; Tian,G.; Ge,J.; Zeng,X.; Song,J.; Zhao,D.; Liu,L.; Jiang,Y.; Guan,Y.; Bu,Z.; Chen,H.
EPI1117	HA	Japan	2004	A/crow/Kyoto/53/2004		Other Database Import
EPI1135	HA	Japan	2004	A/crow/Osaka/102/2004		Other Database Import
EPI275974	HA	China	2004	A/duck/Guangdong/23/2004		Other Database Import	Li,Y.; Shi,J.; Zhong,G.; Deng,G.; Tian,G.; Ge,J.; Zeng,X.; Song,J.; Zhao,D.; Liu,L.; Jiang,Y.; Guan,Y.; Bu,Z.; Chen,H.
EPI101907	HA	China	2004	A/duck/Guangxi/13/2004		Other Database Import
EPI276014	HA	China	2004	A/duck/Hunan/70/2004		Other Database Import	Li,Y.; Shi,J.; Zhong,G.; Deng,G.; Tian,G.; Ge,J.; Zeng,X.; Song,J.; Zhao,D.; Liu,L.; Jiang,Y.; Guan,Y.; Bu,Z.; Chen,H.
EPI276038	HA	China	2004	A/goose/Guangdong/72/2004		Other Database Import	Li,Y.; Shi,J.; Zhong,G.; Deng,G.; Tian,G.; Ge,J.; Zeng,X.; Song,J.; Zhao,D.; Liu,L.; Jiang,Y.; Guan,Y.; Bu,Z.; Chen,H.
EPI100412	HA	China	2004	A/goose/Guangxi/1097/2004		Other Database Import
EPI100410	HA	China	2004	A/goose/Guangxi/914/2004		Other Database Import
EPI228894	HA	China	2004	A/swine/Anhui/ca/2004		Other Database Import	Liao,X.; Zhang,X.; Wang,J.; Yu,J.; Li,T.
EPI116515	HA	Thailand	2004	A/Thailand/16/2004		Other Database Import
EPI116521	HA	Thailand	2004	A/Thailand/Kan353/2004		Other Database Import
EPI25076	HA	China	2004	A/tree sparrow/Henan/1/2004		Other Database Import
EPI25076	HA	China	2004	A/tree_sparrow/Henan/1/2004		Other Database Import
EPI104806	HA	Indonesia	2004	A/turkey/Kedaton/BPPV3/2004		Other Database Import
EPI361524	HA	Vietnam	2004	A/Viet Nam/1203/2004		Other Database Import	Butler,J.; Middleton,D.; Klippel,J.; Rockman,S.; Brown,L.; Sapats,S.
EPI383626	HA	Indonesia	2005-Aug-01	A/Indonesia/UT3006/2005		Other Database Import	Takano,R.
EPI275702	HA	China	2005	A/bar-headed goose/Qinghai/3/2005		Other Database Import	Li,Y.; Shi,J.; Zhong,G.; Deng,G.; Tian,G.; Ge,J.; Zeng,X.; Song,J.; Zhao,D.; Liu,L.; Jiang,Y.; Guan,Y.; Bu,Z.; Chen,H.
EPI317081	HA	Cambodia	2005	A/Cambodia/408008/2005		Other Database Import	Fujisaki,S.
EPI115185	HA	Cambodia	2005	A/Cambodia/JP52a/2005		Other Database Import
EPI181628	HA	Indonesia	2005	A/chicken/Central_Java/UT3091/2005		Other Database Import
EPI226949	HA	Indonesia	2005	A/chicken/Dairi/BPPVI/2005		Other Database Import	Smith,G.; Naipospos,T.S.; Usman,T.; Nguyen,T.; de Jong,M.; Peiris,J.; Guan,Y.
EPI100402	HA	China	2005	A/chicken/Fujian/1042/2005		Other Database Import
EPI107791	HA	China	2005	A/chicken/Guiyang/3055/2005		Other Database Import
EPI101477	HA	China	2005	A/chicken/Hebei/326/2005		Other Database Import
EPI123529	HA	Indonesia	2005	A/Chicken/Indonesia/Wates1/2005		Other Database Import
EPI114796	HA	Russian Federation	2005	A/chicken/Omsk/14/05		Other Database Import
EPI97203	HA	China	2005	A/Chicken/Shantou/810/05		Other Database Import
EPI275870	HA	China	2005	A/chicken/Sichuan/81/2005		Other Database Import	Li,Y.; Shi,J.; Zhong,G.; Deng,G.; Tian,G.; Ge,J.; Zeng,X.; Song,J.; Zhao,D.; Liu,L.; Jiang,Y.; Guan,Y.; Bu,Z.; Chen,H.
EPI97199	HA	China	2005	A/Chicken/Yunnan/447/05		Other Database Import
EPI100400	HA	China	2005	A/duck/Fujian/897/2005		Other Database Import
EPI107793	HA	China	2005	A/duck/Guiyang/3242/2005		Other Database Import
EPI100454	HA	China	2005	A/duck/Hunan/127/2005		Other Database Import
EPI140559	HA	Vietnam	2005	A/duck/Vietnam/1233/2005		Other Database Import
EPI100528	HA	Vietnam	2005	A/duck/Vietnam/568/2005		Other Database Import
EPI107719	HA	China	2005	A/goose/Guangxi/3316/2005		Other Database Import
EPI100442	HA	China	2005	A/goose/Guangxi/345/2005		Other Database Import
EPI116487	HA	Indonesia	2005	A/Indonesia/5/2005		Other Database Import
EPI101747	HA	Thailand	2005	A/Thailand/676/2005		Other Database Import
EPI102703	HA	Turkey	2005	A/turkey/Turkey/1/2005		Other Database Import	Londt,B.Z.; Brown,I.H.
EPI115181	HA	Vietnam	2005	A/Viet Nam/HN30408/2005		Other Database Import
EPI244098	HA	Vietnam	2005-Jun-27	A/duck/Vietnam/TG24/05		Friedrich-Loeffler-Institut
EPI164216	HA	China	2005-Nov-08	A/Anhui/1/2005		WHO Chinese National Influenza Center
EPI164258	HA	China	2005-Nov-29	A/Guangxi/1/2005		WHO Chinese National Influenza Center
EPI41099	HA	Indonesia	2005-Oct-04	A/chicken/Indonesia/CDC25/2005		Other Database Import
EPI224603	HA	Indonesia	2006-Aug-01	A/Chicken/West Java/GARUT-MAY/2006		Other Database Import	Darminto,D.; Dharmayanti,N.L.P.I.; Indriani,R.; Komadina,N.; Selleck,P.
EPI224903	HA	Thailand	2006-Aug-10	A/Thailand/NBL1/2006		Other Database Import	Sangsiriwut,K.; Pooruk,P.; Pittayawonganon,C.; Uiprasertkul,M.; Ungchusak,K.; Auewarakul,P.; Puthavathana,P.
EPI275710	HA	China	2006	A/bar-headed goose/Tibet/8/2006		Other Database Import	Li,Y.; Shi,J.; Zhong,G.; Deng,G.; Tian,G.; Ge,J.; Zeng,X.; Song,J.; Zhao,D.; Liu,L.; Jiang,Y.; Guan,Y.; Bu,Z.; Chen,H.
EPI181632	HA	Indonesia	2006	A/chicken/Banten/UT6025/2006		Other Database Import
EPI181629	HA	Indonesia	2006	A/chicken/East_Java/UT6016/2006		Other Database Import
EPI181631	HA	Indonesia	2006	A/chicken/East_Java/UT6021/2006		Other Database Import
EPI275758	HA	China	2006	A/chicken/Henan/A-7/2006		Other Database Import	Li,Y.; Shi,J.; Zhong,G.; Deng,G.; Tian,G.; Ge,J.; Zeng,X.; Song,J.; Zhao,D.; Liu,L.; Jiang,Y.; Guan,Y.; Bu,Z.; Chen,H.
EPI114969	HA	India	2006	A/chicken/India/NIV33487/06		Other Database Import
EPI275846	HA	China	2006	A/chicken/Shandong/A-10/2006		Other Database Import	Li,Y.; Shi,J.; Zhong,G.; Deng,G.; Tian,G.; Ge,J.; Zeng,X.; Song,J.; Zhao,D.; Liu,L.; Jiang,Y.; Guan,Y.; Bu,Z.; Chen,H.
EPI275862	HA	China	2006	A/chicken/Shanxi/10/2006		Other Database Import	Li,Y.; Shi,J.; Zhong,G.; Deng,G.; Tian,G.; Ge,J.; Zeng,X.; Song,J.; Zhao,D.; Liu,L.; Jiang,Y.; Guan,Y.; Bu,Z.; Chen,H.
EPI175641	HA	China	2006	A/chicken/Shanxi/2/2006		Other Database Import
EPI275910	HA	China	2006	A/chicken/Xinjiang/28/2006		Other Database Import	Li,Y.; Shi,J.; Zhong,G.; Deng,G.; Tian,G.; Ge,J.; Zeng,X.; Song,J.; Zhao,D.; Liu,L.; Jiang,Y.; Guan,Y.; Bu,Z.; Chen,H.
EPI107763	HA	China	2006	A/duck/Guangxi/89/2006		Other Database Import
EPI180956	HA	Lao, People's Democratic Republic	2006	A/duck/Laos/22/2006		Other Database Import
EPI107811	HA	China	2006	A/goose/Guiyang/337/2006		Other Database Import
EPI107965	HA	China	2006	A/Japanese_white-eye/Hong_Kong/1038/2006		Other Database Import
EPI276070	HA	China	2006	A/shrike/Tibet/13/2006		Other Database Import	Li,Y.; Shi,J.; Zhong,G.; Deng,G.; Tian,G.; Ge,J.; Zeng,X.; Song,J.; Zhao,D.; Liu,L.; Jiang,Y.; Guan,Y.; Bu,Z.; Chen,H.
EPI123736	HA	Indonesia	2006-Jul-01	A/Chicken/Papua/TB15/2006		Other Database Import
EPI41325	HA	Indonesia	2006-May-09	A/Indonesia/CDC595/2006		Other Database Import
EPI124421	HA	Indonesia	2006-May-10	A/Indonesia/542H/2006		Other Database Import
EPI270236	HA	Vietnam	2007-Dec-14	A/Vietnam/HN31388M1/2007		Other Database Import	Takano,R.
EPI116452	HA	Egypt	2007-Feb-05	A/Egypt/1394-NAMRU3/2007		Other Database Import
EPI321279	HA	Indonesia	2007	A/chicken/Ampenan/BBVD-282/2007		Other Database Import	Soegiarto,S.; Santhia,K.; Suatmodjo,M.; Axell,A.; Selleck,P.; Davies,K.R.; Stevens,V.; Kim,M.; Daniels,P.; Wong,F.Y.K.
EPI190655	HA	Bangladesh	2007	A/chicken/Bangladesh/394/2007		Other Database Import
EPI181635	HA	Indonesia	2007	A/chicken/East_Java/UT6044/2007		Other Database Import
EPI275726	HA	China	2007	A/chicken/Fujian/1/2007		Other Database Import	Li,Y.; Shi,J.; Zhong,G.; Deng,G.; Tian,G.; Ge,J.; Zeng,X.; Song,J.; Zhao,D.; Liu,L.; Jiang,Y.; Guan,Y.; Bu,Z.; Chen,H.
EPI275814	HA	China	2007	A/chicken/Liaoning/A-1/2007		Other Database Import	Li,Y.; Shi,J.; Zhong,G.; Deng,G.; Tian,G.; Ge,J.; Zeng,X.; Song,J.; Zhao,D.; Liu,L.; Jiang,Y.; Guan,Y.; Bu,Z.; Chen,H.
EPI167617	HA	Vietnam	2007	A/chicken/Vietnam/NCVD-20/2007		Other Database Import
EPI167969	HA	Hong_Kong_(SAR)	2007	A/common_magpie/Hong_Kong/5052/2007		Other Database Import
EPI167585	HA	Vietnam	2007	A/duck/Vietnam/NCVD-16/2007		Other Database Import
EPI174805	HA	Egypt	2007	A/Egypt/321/2007(H5N1)-PR8-IDCDC-RG11		Centers for Disease Control and Prevention
EPI284096	HA	Vietnam	2007	A/Vietnam/HN31244/2007		Other Database Import	Seo,S.H.; Hwang,S.D.
EPI55738	HA	Indonesia	2007-Jan-11	A/Indonesia/CDC1046T/2007		Other Database Import
EPI321396	HA	Indonesia	2007-Jul-24	A/chicken/Sleman/BBVW-493-214/2007		Other Database Import	Wibawa,H.; Usman,T.B.; Junaidi,A.; Poermadjaja,B.; Suatmodjo,M.; Davies,K.R.; Stevens,V.; Selleck,P.; Daniels,P.; Wong,F.Y.K.
EPI321284	HA	Indonesia	2007-Jun-11	A/chicken/Badung/BBVD-277/2007		Other Database Import	Soegiarto,S.; Santhia,K.; Suatmodjo,M.; Axell,A.; Selleck,P.; Davies,K.R.; Stevens,V.; Kim,M.; Daniels,P.; Wong,F.Y.K.
EPI321286	HA	Indonesia	2007-Jun-20	A/chicken/Badung/BBVD-302/2007		Other Database Import	Soegiarto,S.; Santhia,K.; Suatmodjo,M.; Axell,A.; Selleck,P.; Davies,K.R.; Stevens,V.; Kim,M.; Daniels,P.; Wong,F.Y.K.
EPI116462	HA	Egypt	2007-Mar-13	A/Egypt/2321-NAMRU3/2007		Other Database Import
EPI321312	HA	Indonesia	2007-May-29	A/chicken/Denpasar/BBVD-182/2007		Other Database Import	Soegiarto,S.; Santhia,K.; Suatmodjo,M.; Axell,A.; Selleck,P.; Davies,K.R.; Stevens,V.; Kim,M.; Daniels,P.; Wong,F.Y.K.
EPI246278	HA	Korea,_Republic_of	2008-Apr-01	A/chicken/Korea/Gimje/2008		Other Database Import	Kim,H.R.; Park,C.K.; Lee,Y.J.; Woo,G.H.; Lee,G.G.; Oem,J.G.; Kim,S.H.; Jean,Y.H.; Bae,Y.C.; Yoon,S.S.; Roh,I.S.; Kim,H.Y.; Byun,J.W.; Song,Y.K.; Jeong,O.M.; Kwon,J.H.; Joo,Y.S.
EPI280160	HA	China	2008-Dec-04	A/Beijing/1/2009	WHO Chinese National Influenza Center	WHO Chinese National Influenza Center	Lan,Yu,Dong,Libo,Li,Zi,Li,Xiyan,Zhao,Xiang,Cheng,Yanhui,Tan,minju,Yang,Lei,Zou,Shumei,Wen,Leying,Wang,Dayan,Li,Dexin,Shu,Yuelong
EPI284001	HA	Cambodia	2008-Dec-11	A/Cambodia/S1211394/2008		Other Database Import	Buchy,P.; Mardy,S.
EPI328870	HA	China	2008-Dec-15	A/duck/Eastern China/008/2008		Other Database Import	Gu,M.; Liu,W.; Zhao,G.; Xu,Q.; Zhang,W.; Zhang,X.; Cao,Y.; Li,Y.; Peng,D.; Liu,X.
EPI328870	HA	China	2008-Dec-15	A/duck/Eastern_China/008/2008		Other Database Import	Gu,M.; Liu,W.; Zhao,G.; Xu,Q.; Zhang,W.; Zhang,X.; Cao,Y.; Li,Y.; Peng,D.; Liu,X.
EPI219470	HA	Bangladesh	2008-Feb-01	A/Bangladesh/207095/2008		Other Database Import	Davis,T.
EPI270252	HA	Vietnam	2008-Feb-09	A/Vietnam/UT31412II/2008		Other Database Import	Takano,R.
EPI270268	HA	Vietnam	2008-Feb-21	A/Vietnam/HN31432M/2008		Other Database Import	Takano,R.
EPI433309	HA	China	2008	A/chicken/Hong_Kong/AP156/2008		Other Database Import	Ducatez,M.F.; Sonnberg,S.; Phommachanh,P.; Douangngeun,B.; Peiris,M.; Guan,Y.; Webster,R.; Webby,R.
EPI275790	HA	China	2008	A/chicken/Jiangsu/18/2008		Other Database Import	Li,Y.; Shi,J.; Zhong,G.; Deng,G.; Tian,G.; Ge,J.; Zeng,X.; Song,J.; Zhao,D.; Liu,L.; Jiang,Y.; Guan,Y.; Bu,Z.; Chen,H.
EPI275878	HA	China	2008	A/chicken/Tibet/6/2008		Other Database Import	Li,Y.; Shi,J.; Zhong,G.; Deng,G.; Tian,G.; Ge,J.; Zeng,X.; Song,J.; Zhao,D.; Liu,L.; Jiang,Y.; Guan,Y.; Bu,Z.; Chen,H.
EPI173704	HA	Vietnam	2008	A/chicken/Vietnam/NCVD-016/2008	National Centre of Veterinary Diagnostics	Centers for Disease Control and Prevention	Davis,Todd; Rivailler,Pierre; Nguyen,Tung
EPI284489	HA	Vietnam	2008	A/chicken/Vietnam/NCVD-035/2008	National Centre of Veterinary Diagnostics	Centers for Disease Control and Prevention	Davis,Todd; Rivailler,Pierre; Nguyen,Tung
EPI184274	HA	India	2008	A/chicken/West_Bengal/80995/2008		Other Database Import	Tosh,C.; Jain,R.; Nagarajan,S.; Murugkar,H.V.; Dubey,S.C.
EPI168064	HA	Hong Kong (SAR)	2008	A/peregrine falcon/Hong Kong/2142/2008		Other Database Import
EPI168064	HA	Hong_Kong_(SAR)	2008	A/peregrine_falcon/Hong_Kong/2142/2008		Other Database Import
EPI152748	HA	Japan	2008	A/whooper_swan/Hokkaido/2/2008		Other Database Import
EPI162940	HA	Indonesia	2008-Jan-16	A/Indonesia/7261/2008	Ministry of Health, NIHRD	Eijkman Institute for Molecular Biology
EPI270244	HA	Vietnam	2008-Jan-17	A/Vietnam/UT31394II/2008		Other Database Import	Takano,R.
EPI257054	HA	Egypt	2008-Jul-02	A/chicken/Egypt/38-2/2008		Other Database Import	Li,Y.; Liu,L.; El-Sanousi,A.A.; Soliman,R.T.; Hussein,H.A.; Bu,Z.; Chen,H.
EPI493817	HA	China	2008-Jun-06	A/duck/Guangdong/wy11/2008		Other Database Import	Liu,C.G.; Liu,M.; Liu,F.; Lv,R.; Liu,D.F.; Qu,L.D.; Zhang,Y.
EPI287577	HA	India	2008-Mar-23	A/chicken/West Bengal/100879/2008		Other Database Import	Tosh,C.; Jain,R.; Nagarajan,S.; Murugkar,H.V.; Tosh,C.
EPI287577	HA	India	2008-Mar-23	A/chicken/West_Bengal/100879/2008		Other Database Import	Tosh,C.; Jain,R.; Nagarajan,S.; Murugkar,H.V.; Tosh,C.
EPI284473	HA	Vietnam	2008-May-01	A/chicken/Vietnam/NCVD-03/2008	National Centre of Veterinary Diagnostics	Centers for Disease Control and Prevention	Davis,Todd; Rivailler,Pierre; Nguyen,Tung
EPI284476	HA	Vietnam	2008-May-01	A/chicken/Vietnam/NCVD-093/2008	National Centre of Veterinary Diagnostics	Centers for Disease Control and Prevention	Davis,Todd; Rivailler,Pierre; Nguyen,Tung
EPI164208	HA	Indonesia	2008-May-08	A/Indonesia/8228/2008	Ministry of Health, NIHRD	Eijkman Institute for Molecular Biology
EPI220391	HA	China	2008-Nov-01	A/duck/Hunan/8/2008		Other Database Import	Zhang,H.; Chen,Z.
EPI220360	HA	Thailand	2008-Nov-14	A/chicken/Thailand/CU-354/2008		Other Database Import	Amonsin,A.
EPI573520	HA	Vietnam	2009-Apr-16	A/Vietnam/HN31676DH/2009		Other Database Import	Yamaji,R.; Yamada,S.; Le,M.Q.; Li,C.; Chen,H.; Qurnianingsih,E.; Nidom,C.A.; Ito,M.; Sakai-Tagawa,Y.; Kawaoka,Y.
EPI335439	HA	China	2009-Dec-22	A/environment/Chang Sha/25/2009		Other Database Import	Zhang,R.S.; Ou,X.H.; Ye,W.
EPI284454	HA	Vietnam	2009-Feb-01	A/chicken/Vietnam/NCVD-281/2009	National Centre of Veterinary Diagnostics	Centers for Disease Control and Prevention	Davis,Todd; Rivailler,Pierre; Nguyen,Tung
EPI573518	HA	Vietnam	2009-Feb-05	A/Vietnam/UT31604-1/2009		Other Database Import	Yamaji,R.; Yamada,S.; Le,M.Q.; Li,C.; Chen,H.; Qurnianingsih,E.; Nidom,C.A.; Ito,M.; Sakai-Tagawa,Y.; Kawaoka,Y.
EPI372069	HA	Vietnam	2009-Feb-18	A/duck/Vietnam/ST0970/2009		Other Database Import	Nguyen,T.B.N.; Luong,T.V.; Le,T.H.
EPI486487	HA	Indonesia	2009-Feb-27	A/Indonesia/NIHRD9340/2009	National Institute of Health Research and Development	National Institute of Health Research and Development	HA,Pawestri
EPI219308	HA	Mongolia	2009	A/bar-headed goose/Mongolia/X53/2009		Other Database Import	Jizou,M.; Kida,H.; Sakoda,Y.; Okamatsu,M.; Kang,H.M.; Batchuluun,D.; Kim,M.C.; Choi,J.G.; Erdene-Ochir,T.O.; Paek,M.R.; Sugir,T.; Sodnomdarjaa,R.; Kwon,J.H.; Lee,Y.J.; Kang,H.-M.; Kim,M.-C.; Choi,J.-G.; Erdene-Ochir,T.-O.; Paek,M.-R.; Kwon,J.-H.
EPI340804	HA	Indonesia	2009	A/chicken/Agam/BPPVRII-682/2009	Disease Investigation Centre Regional II Bukittinggi (BPPVRII)	CSIRO Australian Animal Health Laboratory	Miswati,Yuli; Yulfitria,.; Azfirman,.; Suatmodjo,Musny; Bruce,Kerri; Davies,Kelly R; Stevens,Vittoria; Kim,Mia; Daniels,Peter; Wong,Frank YK
EPI275750	HA	China	2009	A/chicken/Hebei/A-8/2009		Other Database Import	Li,Y.; Shi,J.; Zhong,G.; Deng,G.; Tian,G.; Ge,J.; Zeng,X.; Song,J.; Zhao,D.; Liu,L.; Jiang,Y.; Guan,Y.; Bu,Z.; Chen,H.
EPI284466	HA	Vietnam	2009	A/chicken/Vietnam/NCVD-279/2009		Centers for Disease Control and Prevention	Davis,Todd; Rivailler,Pierre; Nguyen,Tung
EPI287607	HA	India	2009	A/chicken/West Bengal/155505/2009		Other Database Import	Tosh,C.; Nagarajan,S.; Murugkar,H.V.; Behera,P.; Kulkarni,D.D.; Dubey,S.C.
EPI287607	HA	India	2009	A/chicken/West_Bengal/155505/2009		Other Database Import	Tosh,C.; Nagarajan,S.; Murugkar,H.V.; Behera,P.; Kulkarni,D.D.; Dubey,S.C.
EPI254278	HA	Hong Kong (SAR)	2009	A/feral pigeon/Hong Kong/3409/2009		Other Database Import	Jizou,M.; Kida,H.; Sakoda,Y.; Okamatsu,M.
EPI219345	HA	Hong Kong (SAR)	2009	A/peregrine falcon/Hong Kong/810/2009		Other Database Import	Jizou,M.; Kida,H.; Sakoda,Y.; Okamatsu,M.
EPI280168	HA	China	2009-Jan-08	A/Hunan/1/2009	WHO Chinese National Influenza Center	WHO Chinese National Influenza Center	Lan,Yu,Dong,Libo,Li,Zi,Li,Xiyan,Zhao,Xiang,Cheng,Yanhui,Tan,minju,Yang,Lei,Zou,Shumei,Wen,Leying,Wang,Dayan,Li,Dexin,Shu,Yuelong
EPI328878	HA	China	2009-Jan-15	A/duck/Eastern China/031/2009		Other Database Import	Gu,M.; Liu,W.; Zhao,G.; Xu,Q.; Zhang,W.; Zhang,X.; Cao,Y.; Li,Y.; Peng,D.; Liu,X.
EPI328878	HA	China	2009-Jan-15	A/duck/Eastern_China/031/2009		Other Database Import	Gu,M.; Liu,W.; Zhao,G.; Xu,Q.; Zhang,W.; Zhang,X.; Cao,Y.; Li,Y.; Peng,D.; Liu,X.
EPI280081	HA	China	2009-Jan-15	A/Guizhou/1/2009	WHO Chinese National Influenza Center	WHO Chinese National Influenza Center	Lan,Yu; Dong,Libo; Li,Zi; Li,Xiyan; Zhao,Xiang; Cheng,Yanhui; Tan,minju; Yang,Lei; Zou,Shumei; Wen,Leying; Wang,Dayan; Li,Dexin; Shu,Yuelong
EPI280224	HA	China	2009-Jan-16	A/environment/Guizhou/2/2009	WHO Chinese National Influenza Center	WHO Chinese National Influenza Center	Lan,Yu,Dong,Libo,Li,Zi,Li,Xiyan,Zhao,Xiang,Cheng,Yanhui,Tan,minju,Yang,Lei,Zou,Shumei,Wen,Leying,Wang,Dayan,Li,Dexin,Shu,Yuelong
EPI280232	HA	China	2009-Jan-16	A/environment/Guizhou/4/2009	WHO Chinese National Influenza Center	WHO Chinese National Influenza Center	Lan,Yu,Dong,Libo,Li,Zi,Li,Xiyan,Zhao,Xiang,Cheng,Yanhui,Tan,minju,Yang,Lei,Zou,Shumei,Wen,Leying,Wang,Dayan,Li,Dexin,Shu,Yuelong
EPI280176	HA	China	2009-Jan-23	A/Hunan/2/2009	WHO Chinese National Influenza Center	WHO Chinese National Influenza Center	Lan,Yu,Dong,Libo,Li,Zi,Li,Xiyan,Zhao,Xiang,Cheng,Yanhui,Tan,minju,Yang,Lei,Zou,Shumei,Wen,Leying,Wang,Dayan,Li,Dexin,Shu,Yuelong
EPI214903	HA	Egypt	2009-Mar-01	A/duck/Egypt/0955-NLQP/2009		Other Database Import	Arafa,A.-S.M.; Sleim,A.A.; Hassan,M.K.; Aly,M.M.
EPI284550	HA	Vietnam	2009-Mar-01	A/duck/Vietnam/NCVD-293/2009	National Centre of Veterinary Diagnostics	Centers for Disease Control and Prevention	Davis,Todd; Rivailler,Pierre; Nguyen,Tung
EPI460337	HA	Vietnam	2009-Mar-12	A/Vietnam/HN31673/2009	National Institute of Hygiene and Epidemiology	Centers for Disease Control and Prevention
EPI259006	HA	China	2009-May-15	A/great crested-grebe/Qinghai/1/2009		Other Database Import	Li,Y.; Liu,L.; Zhang,Y.; Duan,Z.; Tian,G.; Zeng,X.; Shi,J.; Zhang,L.; Chen,H.
EPI259006	HA	China	2009-May-15	A/great_crested-grebe/Qinghai/1/2009		Other Database Import	Li,Y.; Liu,L.; Zhang,Y.; Duan,Z.; Tian,G.; Zeng,X.; Shi,J.; Zhang,L.; Chen,H.
EPI219319	HA	India	2009-May-23	A/chicken/India/WB-NIV96526/2009		Other Database Import	Keng,S.; Pal,B.; Mullick,J.; Payyapilly,B.; Pawar,S.D.; Mishra,A.C.
EPI573556	HA	Vietnam	2010-Apr-02	A/Vietnam/36285/2010		Other Database Import	Yamaji,R.; Yamada,S.; Le,M.Q.; Li,C.; Chen,H.; Qurnianingsih,E.; Nidom,C.A.; Ito,M.; Sakai-Tagawa,Y.; Kawaoka,Y.
EPI460454	HA	Vietnam	2010-Apr-03	A/Vietnam/HN36282/2010	National Institute of Hygiene and Epidemiology	Centers for Disease Control and Prevention
EPI341369	HA	Cambodia	2010-Apr-18	A/Cambodia/U0417030/2010		Other Database Import	Buchy,P.; Mardy,S.
EPI398367	HA	Egypt	2010-Apr-21	A/chicken/Menofia/CAI35/2010		Other Database Import	Wentworth,D.E.; Dugan,V.; Halpin,R.; Lin,X.; Bera,J.; Ghedin,E.; Fedorova,N.; Overton,L.; Tsitrin,T.; Stockwell,T.; Amedeo,P.; Bishop,B.; Chen,H.; Edworthy,P.; Gupta,N.; Katzel,D.; Li,K.; Schobel,S.; Shrivastava,S.; Thovarai,V.; Wang,S.; Atta El-Abiary,E.; Saad El-Din Abd El-Latif,W.; Ahmed Khder,A.; Selim Salama,S.; Adel Soliman,Y.; Omar,L.; Aly,M.; El-Satar Arafa Mohamed Arafa,A.; Bao,Y.; Sande…
EPI255367	HA	Egypt	2010-Feb-12	A/Egypt/N01982/2010		Other Database Import	Elassal,E.M.; Kandeel,A.; Abdelghani,A.S.; Elsayed,N.M.; Gomaa,A.A.; Younan,M.; Earhart,K.C.; Turner,M.; Pimentel,G.; Barthel,R.V.
EPI317293	HA	Bhutan	2010-Feb-20	A/chicken/Bhutan/248009/2010		Other Database Import	Dubey,S.C.; Tosh,C.; Dahal,N.; Nagarajan,S.; Murugkar,H.V.; Jain,R.; Patil,S.; Rinzin,K.; Sharma,B.; Kulkarni,D.
EPI620964	HA	Egypt	2010	A/chicken/Egypt/1063/2010		Other Database Import	Pantin-Jackwood,M.J.; Spackman,E.; Suarez,D.L.; Wasilenko,J.; Sarmento,L.; Shepherd,E.; Smith,D.; Lee,S.; Lone,N.A.
EPI442025	HA	China	2010-Jan-08	A/quail/Jiangsu/k0104/2010		Other Database Import	Zhao,K.; Gu,M.; Zhong,L.; Duan,Z.; Zhang,Y.; Zhu,Y.; Zhao,G.; Zhao,M.; Chen,Z.; Hu,S.; Liu,W.; Liu,X.; Peng,D.
EPI372247	HA	India	2010-Jan-18	A/chicken/India/241272/2010		Other Database Import	Tosh,C.; Nagarajan,S.; Murugkar,H.V.; Patil,S.; Dubey,S.C.
EPI267066	HA	Israel	2010-Jan-25	A/chicken/Israel/65/2010		Other Database Import	Shkoda,I.; Lapin,K.; Perk,S.
EPI355184	HA	Indonesia	2010-Jun-01	A/chicken/EastKalimantan/UT581/2010		Other Database Import	Nidom,C.A.; Yamada,S.; Nidom,R.V.; Rahmawati,K.; Alamudi,M.Y.; Kholik; Indrasari,S.; Hayati,R.S.; Iwatsuki-Horimoto,K.; Kawaoka,Y.
EPI324340	HA	Indonesia	2010-Jun-01	A/chicken/Indonesia/D10014/2010		Other Database Import	Shinya,K.; Poetranto,E.D.; Yamaoka,M.
EPI324341	HA	Indonesia	2010-Jun-01	A/chicken/Indonesia/D10015/2010		Other Database Import	Shinya,K.; Poetranto,E.D.; Yamaoka,M.
EPI267032	HA	China	2010-Jun-01	A/Hubei/1/2010		WHO Chinese National Influenza Center	Yu Lan,Wei Wang,Shumei Zou,Zi Li,Leying Wen,Xiaodan Li,Libo Dong,Dexin Li,Yuelong Shu
EPI414084	HA	China	2010-Mar-01	A/barn swallow/Hong Kong/1161/2010		Other Database Import	Ducatez,M.F.; Sonnberg,S.; Phommachanh,P.; Douangngeun,B.; Peiris,M.; Guan,Y.; Webster,R.; Webby,R.
EPI255379	HA	Egypt	2010-Mar-07	A/Egypt/N03072/2010		Other Database Import	Elassal,E.M.; Kandeel,A.; Abdelghani,A.S.; Elsayed,N.M.; Gomaa,A.A.; Younan,M.; Earhart,K.C.; Turner,M.; Pimentel,G.; Barthel,R.V.
EPI460470	HA	Vietnam	2010-Mar-10	A/Vietnam/HN36250/2010	National Institute of Hygiene and Epidemiology	Centers for Disease Control and Prevention
EPI335233	HA	Lao, People's Democratic Republic	2010-May-01	A/chicken/Lao/LH2/2010		Other Database Import	Sonnberg,S.; Phommachanh,P.; Naipospos,T.S.P.; McKenzie,J.; Chanthavisouk,C.; Pathammavong,S.; Darnell,D.; Meeduangchanh,P.; Rubrum,A.M.; Souriya,M.; Khambounheuang,B.; Webby,R.J.; Douangngeun,B.; Webster,R.G.
EPI324615	HA	Indonesia	2010-May-01	A/tree sparrow/Indonesia/D10013/2010		Other Database Import	Shinya,K.; Poetranto,E.D.; Yamaoka,M.
EPI487454	HA	Indonesia	2010-Nov-21	A/Indonesia/NIHRD10728/2010	National Institute of Health Research and Development	National Institute of Health Research and Development	HA,Pawestri
EPI489378	HA	Indonesia	2011-Apr-08	A/Indonesia/NIHRD11454/2011	National Institute of Health Research and Development	National Institute of Health Research and Development	HA,Pawestri
EPI475579	HA	China	2011-Apr-14	A/wild duck/Shandong/628/2011		Other Database Import	Liu,Y.; Liu,M.; Liu,C.
EPI475579	HA	China	2011-Apr-14	A/wild_duck/Shandong/628/2011		Other Database Import	Liu,Y.; Liu,M.; Liu,C.
EPI425232	HA	Vietnam	2011-Dec-30	A/duck/Vietnam/NCVD-1160/2011	National Centre of Veterinary Diagnostics	Centers for Disease Control and Prevention
EPI359867	HA	Korea, Republic of	2011-Feb-01	A/chicken/Korea/IC546/2011		Other Database Import	Kim,H.R.; Lee,Y.J.; Park,C.K.; Oem,J.K.; Lee,O.S.; Kang,H.M.; Choi,J.G.; Bae,Y.C.
EPI401561	HA	Japan	2011-Feb-01	A/chicken/Miyazaki/11/2011		Other Database Import	Uchida,Y.; Suzuki,Y.; Shirakura,M.; Kawaguchi,A.; Nobusawa,E.; Tanikawa,T.; Hikono,H.; Takemae,N.; Mase,M.; Kanehira,K.; Hayashi,T.; Tagawa,Y.; Tashiro,M.; Saito,T.
EPI332698	HA	Vietnam	2011-Feb-01	A/chicken/Vietnam/NCVD-700/2011	National Centre of Veterinary Diagnostics	Centers for Disease Control and Prevention	Davis,Todd; Rivailler,Pierre; Nguyen,Tung
EPI336997	HA	China	2011-Feb-01	A/duck/Zhejiang/224/2011		Other Database Import	Wu,H.; Wu,N.
EPI448063	HA	Bangladesh	2011-Feb-15	A/crow/Bangladesh/1061/2011	Institute of Epidemiology Disease Control and Research (IEDCR) & Bangladesh National Influenza Centre (NIC)	Centers for Disease Control and Prevention	Gerloff, Nancy; Simpson, Natosha; Poh, Mee;Davis, Todd
EPI341367	HA	Cambodia	2011-Feb-17	A/Cambodia/V0219301/2011		Other Database Import	Buchy,P.; Mardy,S.
EPI353372	HA	Bangladesh	2011-Feb-19	A/chicken/Bangladesh/3012/2011	Institute of Epidemiology Disease Control and Research (IEDCR) & Bangladesh National Influenza Centre (NIC)	Centers for Disease Control and Prevention	Gerloff, Nancy; Simpson, Natosha; Poh, Mee;Davis, Todd
EPI425480	HA	Vietnam	2011-Feb-25	A/chicken/Vietnam/NCVD-775/2011	National Centre of Veterinary Diagnostics	Centers for Disease Control and Prevention
EPI330995	HA	Vietnam	2011	A/duck/Vietnam/NCVD-672/2011	National Centre of Veterinary Diagnostics	Centers for Disease Control and Prevention	Davis,Todd; Rivailler,Pierre; Nguyen,Tung
EPI307499	HA	Japan	2011	A/whooper swan/Hokkaido/4/2011		Other Database Import	Sakoda,Y.; Ito,H.; Uchida,Y.; Okamatsu,M.; Yamamoto,N.; Soda,K.; Nomura,N.; Kuribayashi,S.; Shichinohe,S.; Sunden,Y.; Umemura,T.; Usui,T.; Ozaki,H.; Yamaguchi,T.; Murase,T.; Ito,T.; Saito,T.; Takada,A.; Kida,H.; Jizou,M.
EPI369180	HA	Egypt	2011-Jul-14	A/duck/Egypt/1120SMF/2011		Other Database Import	Arafa,A.; Hagag,N.; Yehia,N.; Mady,W.; Adel,A.; Naguib,M.; Elhuseiny,M.; Abdel-Wanees,S.
EPI353379	HA	Bangladesh	2011-Jul-17	A/waterfowl/Bangladesh/31935/2011	Institute of Epidemiology Disease Control and Research (IEDCR) & Bangladesh National Influenza Centre (NIC)	Centers for Disease Control and Prevention	Gerloff, Nancy; Simpson, Natosha; Poh, Mee;Davis, Todd
EPI424792	HA	Vietnam	2011-Jun-15	A/chicken/Vietnam/NCVD-876/2011	National Centre of Veterinary Diagnostics	Centers for Disease Control and Prevention
EPI340105	HA	Egypt	2011-Mar-01	A/chicken/Egypt/116AD/2011		Other Database Import	Arafa,A.; Hagag,N.; Yehia,N.; Adel,A.; Elhusseiny,M.; Mehana,O.; Mady,W.; Samir,A.; Nageeb,M.; Selim,A.; Hassan,M.; Hussein,H.; Suarez,D.; Spackman,E.; Swayne,D.; Aly,M.
EPI336863	HA	Israel	2011-Mar-06	A/turkey/Israel/362/2011		Other Database Import	Shkoda,I.; Lapin,K.; Davidson,I.; Perk,S.; Panshin,A.
EPI448095	HA	Bangladesh	2011-Mar-07	A/Bangladesh/5487/2011	Institute of Epidemiology Disease Control and Research (IEDCR) & Bangladesh National Influenza Centre (NIC)	Centers for Disease Control and Prevention	Gerloff, Nancy; Simpson, Natosha; Poh, Mee;Davis, Todd
EPI399721	HA	China	2011-Mar-07	A/environment/Hunan/3/2011		Other Database Import	Wang,B.; Chen,Q.; Chen,Z.
EPI314775	HA	Bangladesh	2011-Mar-09	A/Bangladesh/3233/2011		Other Database Import	Rahman,M. CONSRTM Influenza Division; CDC
EPI341366	HA	Cambodia	2011-Mar-31	A/Cambodia/V0401301/2011		Other Database Import	Buchy,P.; Mardy,S.
EPI425200	HA	Vietnam	2011-Nov-22	A/duck/Vietnam/NCVD129-7/2011	National Centre of Veterinary Diagnostics	Centers for Disease Control and Prevention
EPI341633	HA	Indonesia	2011-Oct-07	A/Indonesia/NIHRD11771/2011(H5N1)	National Institute of Health Research and Development	National Institute of Health Research and Development	Pawestri,H.A;Setiawaty,V;Sampurno,O.D;Takayama,I;Shirakura,M;Kageyama,T;Tashiro,M
EPI539360	HA	Vietnam	2011-Oct-19	A/Viet Nam/CM32/2011		Other Database Import	Mai,L.Q.; Horby,P.; Fox,A.; Hien,N.T.; Hang,N.L.K.; Phuong,H.V.M.; Khanh,N.C.; de Jong,M.D.; Jeeninga,R.E.; van Doorn,R.; Farrar,J.; Wertheim,H.F.L.
EPI424362	HA	Vietnam	2012-Feb-08	A/duck/Vietnam/NCVD-1206/2012	National Centre of Veterinary Diagnostics	Centers for Disease Control and Prevention
EPI425440	HA	Vietnam	2012-Feb-08	A/duck/Vietnam/NCVD-1210/2012	National Centre of Veterinary Diagnostics	Centers for Disease Control and Prevention
EPI381890	HA	Vietnam	2012-Feb-18	A/muscovy duck/Vietnam/OIE-0043/2012		Other Database Import	Kida,H.; Sakoda,Y.; Okamatsu,M.; Nam,H.V.; Long,N.V.; Huy,C.D.; Tien,T.N.; Hatamachi,J.
EPI381890	HA	Vietnam	2012-Feb-18	A/muscovy_duck/Vietnam/OIE-0043/2012		Other Database Import	Kida,H.; Sakoda,Y.; Okamatsu,M.; Nam,H.V.; Long,N.V.; Huy,C.D.; Tien,T.N.; Hatamachi,J.
EPI376143	HA	Vietnam	2012-Feb-19	A/duck/Vietnam/OIE-0062/2012		Other Database Import	Kida,H.; Sakoda,Y.; Okamatsu,M.; Nam,H.V.; Long,N.V.; Huy,C.D.; Tien,T.N.; Hatamachi,J.
EPI448279	HA	Bangladesh	2012-Feb-20	A/duck/Bangladesh/32077/2012	Institute of Epidemiology Disease Control and Research (IEDCR) & Bangladesh National Influenza Centre (NIC)	Centers for Disease Control and Prevention	Gerloff, Nancy; Simpson, Natosha; Poh, Mee;Davis, Todd
EPI393783	HA	Egypt	2012-Feb-21	A/Egypt/N00951/2012		Other Database Import	Younan,M.; Poh,M.K.; Amir,E.; Simpson,N.; Bahgat,V.; Naguib,A.; Abdelghani,A.S.; Saied,I.; Refaey,S.; Kandeel,A.; Labib,M.
EPI639606	HA	Vietnam	2012-Feb-23	A/Vietnam/CD12-76/2012	Pasteur Institute, Influenza Laboratory	Centers for Disease Control and Prevention
EPI448263	HA	Bangladesh	2012-Feb-28	A/environment/Bangladesh/1019-G/2012	Institute of Epidemiology Disease Control and Research (IEDCR) & Bangladesh National Influenza Centre (NIC)	Centers for Disease Control and Prevention	Gerloff, Nancy; Simpson, Natosha; Poh, Mee; Davis, Todd
EPI356472	HA	Indonesia	2012-Jan-07	A/Indonesia/NIHRD11931/2012	National Institute of Health Research and Development	National Institute of Health Research and Development	Pawestri,H.A;Puspa,K.D;Ikawati,H.D;Setiawaty,V;Sampurno,O.D
EPI448271	HA	Bangladesh	2012-Jan-08	A/chicken/Bangladesh/42010/2012	Institute of Epidemiology Disease Control and Research (IEDCR) & Bangladesh National Influenza Centre (NIC)	Centers for Disease Control and Prevention	Gerloff, Nancy; Simpson, Natosha; Poh, Mee;Davis, Todd
EPI425240	HA	Vietnam	2012-Jan-13	A/duck/Vietnam/NCVD-1171/2012	National Centre of Veterinary Diagnostics	Centers for Disease Control and Prevention
EPI460329	HA	Vietnam	2012-Jan-14	A/Vietnam/VP12-3/2012	Pasteur Institute, Influenza Laboratory	Centers for Disease Control and Prevention
EPI425931	HA	Vietnam	2012-Jul-12	A/duck/Vietnam/NCVD-1544/2012	National Centre of Veterinary Diagnostics	Centers for Disease Control and Prevention
EPI424984	HA	Vietnam	2012-Jul-27	A/duck/Vietnam/NCVD-1584/2012	National Centre of Veterinary Diagnostics	Centers for Disease Control and Prevention
EPI542914	HA	Cambodia	2012-Mar-29	A/Cambodia/W0329318/2012		Other Database Import	Buchy,P.
EPI542922	HA	Cambodia	2012-May-25	A/Cambodia/W0526301/2012		Other Database Import	Buchy,P.
EPI375432	HA	Hong Kong (SAR)	2012-May-28	A/Hong Kong/5923/2012	Hong Kong Department of Health	Hong Kong Department of Health	Mak,G.C.; Cheng,P.K.C.; Lo,J.Y.C.
EPI624930	HA	Vietnam	2013-Apr-04	A/Vietnam/VP13-28H/2013	Pasteur Institute of Ho Chi Minh City	National Institute of Infectious Diseases (NIID)	Ikuyo, Takayama; Nguyen Trung, Hieu; Masayuki, Shirakura; Mina, Nakauchi; Seiichiro, Fujisaki; Hitoshi, Takahashi; Shiho, Nagata; Nguyen Thanh, Long; Takato, Odagiri; Masato, Tashiro; Tsutomu, Kageyama
EPI485587	HA	Cambodia	2013-Aug-09	A/Cambodia/X0810301/2013	Institut Pasteur of Cambodia	Institut Pasteur of Cambodia	Rith, S.; Horm, SV.; Buchy, P.
EPI420386	HA	China	2013-Feb-08	A/Guizhou/1/2013	WHO Chinese National Influenza Center	WHO Chinese National Influenza Center
EPI420391	HA	China	2013-Feb-09	A/Guizhou/2/2013	WHO Chinese National Influenza Center	WHO Chinese National Influenza Center
EPI492440	HA	Bangladesh	2013-Feb-14	A/duck/Bangladesh/19097/2013		Other Database Import	Feeroz,M.M.; Alam,R.S.; Hasan,K.M.; McKenzie,P.; Marinova-Petkova,A.; Webster,R.G.
EPI542804	HA	Cambodia	2013-Jan-09	A/Cambodia/X0123311/2013		Other Database Import	Buchy,P.
EPI537675	HA	Cambodia	2013-Nov-08	A/Cambodia/X1108306/2013	Institut Pasteur of Cambodia	Institut Pasteur of Cambodia	Horm, S-V; Rith, S; Buchy, P.
EPI531332	HA	Cambodia	2013-Oct-22	A/Cambodia/X1024307/2013		Other Database Import	Rith,S.; Horm,S.V.; Buchy,P.
EPI492524	HA	Indonesia	2013-Sep-27	A/Indonesia/NIHRD13233/2013	National Institute of Health Research and Development	National Institute of Health Research and Development	HA,Pawestri;HD,Ikawati;KD,Puspa;AA,Nugraha;V,Setiawaty
EPI531959	HA	Indonesia	2014-Apr-19	A/Indonesia/NIHRD14122/2014	National Institute of Health Research and Development	National Institute of Health Research and Development	HA,Pawestri;AA,Nugraha;KD,Puspa;HD,Ikawati;V,Setiawaty
EPI533583	HA	China	2014-Apr-21	A/Sichuan/26221/2014		WHO Chinese National Influenza Center
EPI590897	HA	China	2014-Apr-27	A/duck/Sichuan/NCXN11/2014		Other Database Import	Bi,Y.; Chen,Q.; Chen,J.
EPI657618	HA	China	2014-Apr-27	A/pigeon/Sichuan/04.27 NBXJ743/2014(H5N6)		Institute of Microbiology, Chinese Academy of Sciences
EPI682938	HA	China	2014-Dec-01	A/turtledove/Wuhan/WHBJ26/2014		Other Database Import	Chen,L.-J.; Lin,X.-D.; Guo,W.-P.; Tian,J.-H.; Zhang,Y.-Z.
EPI603561	HA	United Arab Emirates	2014-Dec-07	A/Sea Gull/Dubai/AR3443-25041/2014		Friedrich-Loeffler-Institut	Naguib, M.M.; Wernery, U.; Harder, T.
EPI603569	HA	United Arab Emirates	2014-Dec-07	A/Stone curlew/Dubai/AR3444-25042/2014		Friedrich-Loeffler-Institut	Naguib, M.M.; Wernery, U.; Harder, T.
EPI569390	HA	United States	2014-Dec-08	A/gyrfalcon/Washington/41088-6/2014		Other Database Import	Ip,H.S.; Kim-Torchetti,M.; Crespo,R.; Kohrs,P.; DeBruyn,P.; Mansfield,K.G.; Baszler,T.; Badcoe,L.; Bodenstein,B.; Shearn-Boschler,V.; Killian,M.L.; Pedersen,J.C.; Hines,N.; Gidlewski,T.; DeLiberto,T.; Sleeman,J.; Shearn-Bochsler,V.; Long,R.L.; Hines,N.L.
EPI569372	HA	United States	2014-Dec-16	A/chicken/Oregon/41613-2/2014		Other Database Import	Killian,M.L.
EPI573646	HA	Japan	2014-Dec-17	A/crane/Kagoshima/KU21/2014(H5N8)	Kagoshima University	Kagoshima University
EPI573237	HA	Korea, Republic of	2014-Dec-18	A/mallard/Korea/H1991/2014		Animal and Plant Quarantine Agency (S-2026)
EPI573286	HA	United_States	2014-Dec-29	A/American_green-winged_teal/Washington/195750/2014		Other Database Import	Killian,M.L.; Ip,H.S.; Dusek,R.; Bodenstein,B.
EPI573276	HA	United States	2014-Dec-30	A/domestic duck/Washington/61-16/2014		Other Database Import	Killian,M.L.
EPI573281	HA	United States	2014-Dec-30	A/turkey/Washington/61-22/2014		Other Database Import	Killian,M.L.
EPI561697	HA	Korea, Republic of	2014-Feb-08	A/spot-billed duck/Korea/H455-42/2014		Other Database Import	Jeong,J.; Kang,H.M.; Lee,E.K.; Song,B.M.; Kwon,Y.K.; Kim,H.R.; Choi,K.S.; Kim,J.Y.; Lee,H.J.; Moon,O.K.; Jeong,W.; Choi,J.; Baek,J.H.; Joo,Y.S.; Park,Y.H.; Lee,H.S.; Lee,Y.J.; Lee,Y.-J.; Kang,H.-M.; Lee,E.-K.; Song,B.-M.; Lee,K.-J.; Hong,M.-S.
EPI545463	HA	Vietnam	2014-Feb-16	A/duck/Khanhhoa/CVVI-38/2014		Other Database Import	Nguyen,H.T.; Than,V.T.; Kim,W.
EPI898448	HA	Vietnam	2014-Feb-20	A/chicken/Vietnam/NCVD14-A461/2014		Other Database Import	Davis,T.; Jang,Y.
EPI545467	HA	Vietnam	2014-Feb-21	A/chicken/Khanhhoa/CVVI-42/2014		Other Database Import	Nguyen,H.T.; Than,V.T.; Kim,W.
EPI736914	HA	China	2014-Feb-23	A/Changsha/1/2014		Other Database Import	Zhang,R.; Chen,T.; Ou,X.; Liu,R.; Yang,Y.; Ye,W.; Chen,J.; Yao,D.; Sun,B.; Zhang,X.; Zhou,J.; Sun,Y.; Chen,F.; Wang,S.P.; Zhang,R.S.; Ou,X.H.; Cheng,J.F.
EPI861000	HA	United States	2014	A/Northern_pintail/Washington/40964/2014	National Institute of Animal Health	National Institute of Animal Health	Uchida,U.
EPI500771	HA	Canada	2014-Jan-03	A/Alberta/01/2014	Provincial Laboratory of Public Health for Southern Alberta	Public Health Agency of Canada (PHAC)	Li, Yan; Bastien, Nathalie; Fonseca, Kevin; Tipples, Graham; Pabbaraju, Kanti; Tellier, Raymond; Wong, Sallene; Tang, Julian W.; Drews, Steven J.
EPI672795	HA	China	2014-Jan-06	A/duck/Guangdong/s14044/2014		Other Database Import	Song,Y.; Cui,J.; Song,H.; Ye,J.; Zhao,Z.; Wu,S.; Xu,C.; Jiao,P.; Liao,M.
EPI590113	HA	China	2014-Jan-10	A/chicken/DaLi/502/2014		Other Database Import	Hu,T.; Song,J.; Zhang,W.; Zhao,H.; Duan,B.; Liu,Q.; Zeng,W.; Qiu,W.; Chen,G.; Zhang,Y.; Fan,Q.; Zhang,F.
EPI590115	HA	China	2014-Jan-12	A/chicken/Tonghai/5/2014		Other Database Import	Hu,T.; Song,J.; Zhang,W.; Zhao,H.; Duan,B.; Liu,Q.; Zeng,W.; Qiu,W.; Chen,G.; Zhang,Y.; Fan,Q.; Zhang,F.
EPI624914	HA	Vietnam	2014-Jan-18	A/Vietnam/14011801/2014	Pasteur Institute of Ho Chi Minh City	National Institute of Infectious Diseases (NIID)	Ikuyo, Takayama; Nguyen Trung, Hieu; Masayuki, Shirakura; Mina, Nakauchi; Seiichiro, Fujisaki; Hitoshi, Takahashi; Shiho, Nagata; Nguyen Thanh, Long; Takato, Odagiri; Masato, Tashiro; Tsutomu, Kageyama
EPI585585	HA	Korea,_Republic_of	2014-Jan-20	A/baikal_teal/Korea/1454/2014		Other Database Import	Kim,S.-H.; Hur,M.; Suh,J.-H.; Woo,C.; Wang,S.-J.; Park,E.-R.; Hwang,J.; An,I.-J.; Jo,S.-D.; Yu,S.D.; Choi,K.; Lee,D.-H.; Song,C.-S.
EPI561495	HA	Korea,_Republic_of	2014-Jan-20	A/Baikal_teal/Korea/H52/2014		Other Database Import	Jeong,J.; Kang,H.M.; Lee,E.K.; Song,B.M.; Kwon,Y.K.; Kim,H.R.; Choi,K.S.; Kim,J.Y.; Lee,H.J.; Moon,O.K.; Jeong,W.; Choi,J.; Baek,J.H.; Joo,Y.S.; Park,Y.H.; Lee,H.S.; Lee,Y.J.; Lee,Y.-J.; Kang,H.-M.; Lee,E.-K.; Song,B.-M.; Lee,K.-J.; Hong,M.-S.
EPI974469	HA	Vietnam	2014-Jan-20	A/chicken/Vietnam/RTD1302/2014		Other Database Import	Le,P.V.; Song,D.; Na,W.; Yeom,M.; Kim,H.-K.
EPI672774	HA	China	2014-Jan-20	A/wildfowl/China/472/2014	Institute of Poultry Science, Shandong, Academy of Agricultural Science	South China Agricultural University	Wang, Youling
EPI561612	HA	Korea, Republic of	2014-Jan-26	A/breeder duck/Korea/H158/2014		Other Database Import	Jeong,J.; Kang,H.M.; Lee,E.K.; Song,B.M.; Kwon,Y.K.; Kim,H.R.; Choi,K.S.; Kim,J.Y.; Lee,H.J.; Moon,O.K.; Jeong,W.; Choi,J.; Baek,J.H.; Joo,Y.S.; Park,Y.H.; Lee,H.S.; Lee,Y.J.; Lee,Y.-J.; Kang,H.-M.; Lee,E.-K.; Song,B.-M.; Lee,K.-J.; Hong,M.-S.
EPI561612	HA	Korea,_Republic_of	2014-Jan-26	A/breeder_duck/Korea/H158/2014		Other Database Import	Jeong,J.; Kang,H.M.; Lee,E.K.; Song,B.M.; Kwon,Y.K.; Kim,H.R.; Choi,K.S.; Kim,J.Y.; Lee,H.J.; Moon,O.K.; Jeong,W.; Choi,J.; Baek,J.H.; Joo,Y.S.; Park,Y.H.; Lee,H.S.; Lee,Y.J.; Lee,Y.-J.; Kang,H.-M.; Lee,E.-K.; Song,B.-M.; Lee,K.-J.; Hong,M.-S.
EPI624922	HA	Vietnam	2014-Jan-28	A/Vietnam/14012902/2014	Pasteur Institute of Ho Chi Minh City	National Institute of Infectious Diseases (NIID)	Ikuyo, Takayama; Nguyen Trung, Hieu; Masayuki, Shirakura; Mina, Nakauchi; Seiichiro, Fujisaki; Hitoshi, Takahashi; Shiho, Nagata; Nguyen Thanh, Long; Takato, Odagiri; Masato, Tashiro; Tsutomu, Kageyama
EPI567084	HA	Vietnam	2014-Jul-12	A/muscovy duck/Long An/87/2014		Other Database Import	Soda,K.; Yamashiro,T.; Le,Q.M.; Ito,T.
EPI567084	HA	Vietnam	2014-Jul-12	A/muscovy_duck/Long_An/87/2014		Other Database Import	Soda,K.; Yamashiro,T.; Le,Q.M.; Ito,T.
EPI965047	HA	Bangladesh	2014-Jul-17	A/duck/Bangladesh/22996/2014		Other Database Import	Marinova-Petkova,A.; Shanmuganatham,K.; Feeroz,M.M.; Jones-Engel,L.; Hasan,M.K.; Akhtar,S.; Turner,J.; Walker,D.; Seiler,P.; Franks,J.; McKenzie,P.; Krauss,S.; Webby,R.J.; Webster,R.G.; Hasan,K.; Seiler,J.
EPI681279	HA	China	2014-Jul-27	A/duck/Zhejiang/727041/2014		Other Database Import	Wu,H.; Peng,X.; Cheng,L.; Lu,X.; Jin,C.; Xie,T.; Yao,H.; Wu,N.
EPI681275	HA	China	2014-Jul-27	A/pigeon/Zhejiang/727097/2014		Other Database Import	Wu,H.; Peng,X.; Cheng,L.; Lu,X.; Jin,C.; Xie,T.; Yao,H.; Wu,N.
EPI585731	HA	China	2014-Jun-01	A/swan_goose/Jilin/JL01/2014		Other Database Import	Yu,Z.; Wang,T.; Gao,X.; Gao,Y.; Xia,X.
EPI547699	HA	Indonesia	2014-Jun-06	A/Indonesia/NIHRD14157/2014	National Institute of Health Research and Development	National Institute of Health Research and Development	HA,Pawestri;AA,Nugraha;V,Setiawaty
EPI621173	HA	China	2014-Jun-17	A/chicken/Jiangsu/2477/2014		Other Database Import	Ma,M.-J.; Lu,B.; Yang,X.-X.; Zhao,T.; Zhou,J.-J.; Chen,W.-J.; Gray,G.C.; Qian,Y.-H.; Chen,S.-H.; Ma,G.-Y.; Cao,W.-C.
EPI550752	HA	Lao, People's Democratic Republic	2014-Mar-12	A/chicken/Laos/LPQ001/2014		Other Database Import	Wong,F.Y.K.; Phommachanh,P.; Kalpravidh,W.; Chanthavisouk,C.; Gilbert,J.; Bingham,J.; Davies,K.R.; Cooke,J.; Eagles,D.; Phiphakhavong,S.; Shan,S.; Stevens,V.; Williams,D.T.; Bounma,P.; Khambounheuang,B.; Morrissy,C.; Douangngeun,B.; Morzaria,S.
EPI965071	HA	Bangladesh	2014-Mar-18	A/chicken/Bangladesh/22159/2014		Other Database Import	Marinova-Petkova,A.; Shanmuganatham,K.; Feeroz,M.M.; Jones-Engel,L.; Hasan,M.K.; Akhtar,S.; Turner,J.; Walker,D.; Seiler,P.; Franks,J.; McKenzie,P.; Krauss,S.; Webby,R.J.; Webster,R.G.; Hasan,K.; Seiler,J.
EPI573200	HA	Korea, Republic of	2014-Mar-21	A/Korean native chicken/Korea/H1139/2014		Animal and Plant Quarantine Agency (S-2026)
EPI602174	HA	China	2014-Mar-30	A/duck/Jiangxi/13475/2014		Other Database Import	Ma,C.; Lam,T.T.Y.; Chai,Y.; Wang,J.; Fan,X.; Hong,W.; Zhang,Y.; Li,L.; Liu,Y.; Smith,D.K.; Webby,R.J.; Peiris,J.S.M.; Zhu,H.; Guan,Y.
EPI675775	HA	China	2014-May-04	A/wild bird/Liaoning/S1660/2014	Harbin Veterinary Research Institute (CAAS)	Harbin Veterinary Research Institute (CAAS)	Zeng, X.; Chen, P.; Liu, L.; Deng, G.; Li, Y.; Shi, J.; Kong, H.; Feng, H.; Bai, J.; Li, X.; Tian, G.; Chen, H.
EPI898371	HA	Vietnam	2014-May-06	A/chicken/Vietnam/NCVD14-A384/2014		Other Database Import	Davis,T.; Jang,Y.
EPI958922	HA	China	2014-Nov-11	A/muscovy/duck/Hunan/85/2014		Wuhan Institute of Virology
EPI573233	HA	Korea, Republic of	2014-Nov-12	A/Korean native chicken/Korea/H1847/2014		Animal and Plant Quarantine Agency (S-2026)
EPI548623	HA	Netherlands	2014-Nov-15	A/chicken/Netherlands/14015531/2014	Wageningen Bioveterinary Research	Wageningen Bioveterinary Research	Heutink, Rene; Harders, Frank; Verschuren-Pritz, Sylvia; Bossers, Alex; Koch, Guus; Bouwstra, Ruth
EPI894950	HA	Vietnam	2015-Apr-02	A/chicken/Vietnam/NCVD-15A22/2015		Other Database Import	Davis,T.; Jang,Y.
EPI940816	HA	China	2015-Apr-05	A/wild bird/Jiangsu/H167/2015		Other Database Import	Jiang,W.; Hou,G.; Li,J.; Peng,C.; Wang,S.; Chen,J.
EPI662737	HA	United States	2015-Apr-08	A/chicken/Wisconsin/15-011595-1/2015		Other Database Import	Killian,M.
EPI837560	HA	Korea, Republic of	2015-Apr-16	A/chicken/Korea/H2590/2015		Animal and Plant Quarantine Agency (S-2026)
EPI660239	HA	China	2015-Apr-23	A/duck/Guangdong/04.23 DGQTXC231-O/2015(H5N6)		Institute of Microbiology, Chinese Academy of Sciences
EPI620429	HA	United States	2015-Apr-30	A/turkey/Iowa/14318-1/2015		Other Database Import	Killian,M.L.; Gauger,P.C.; Yoon,K.-J.
EPI893505	HA	Vietnam	2015-Aug-15	A/duck/Vietnam/HU3-16/2015(H5N1)		Other Database Import	Nguyen,T.L.; Chu,D.C.; Hiono,T.; Matsuno,K.; Okamatsu,M.; Sakoda,Y.; Hatamachi,J.
EPI641398	HA	China	2015-Feb-06	A/Yunnan/0127/2015		Other Database Import	Xia,X.; Zhang,Y.; Yang,Z.; Guan,W.; Yuan,B.; Feng,Y.; Wang,Y.; Song,Y.; Li,Z.; Zhong,N.; Li,S.
EPI641396	HA	China	2015-Feb-17	A/chicken/Yunnan/25A/2015		Other Database Import	Xia,X.; Zhang,Y.; Yang,Z.; Guan,W.; Yuan,B.; Feng,Y.; Wang,Y.; Song,Y.; Li,Z.; Zhong,N.; Li,S.
EPI965386	HA	Bangladesh	2015-Feb-25	A/duck/Bangladesh/24482/2015		Other Database Import	Marinova-Petkova,A.; Barman,S.; Hasan,M.K.; Akhtar,S.; Turner,J.C.; Franks,J.; Walker,D.; Seiler,P.; Friedman,K.; Kercher,L.; Kayali,G.; Jones-Engel,L.; McKenzie,P.; Krauss,S.; Webby,R.J.; Feeroz,M.M.; Webster,R.G.
EPI641394	HA	China	2015-Feb-27	A/chicken/Yunnan/22/2015		Other Database Import	Xia,X.; Zhang,Y.; Yang,Z.; Guan,W.; Yuan,B.; Feng,Y.; Wang,Y.; Song,Y.; Li,Z.; Zhong,N.; Li,S.
EPI682917	HA	China	2015	A/duck/Taizhou/TZYG12/2015		Other Database Import	Chen,L.-J.; Lin,X.-D.; Guo,W.-P.; Tian,J.-H.; Zhang,Y.-Z.
EPI682916	HA	China	2015	A/duck/Wuhan/JXYFB22/2015		Other Database Import	Chen,L.-J.; Lin,X.-D.; Guo,W.-P.; Tian,J.-H.; Zhang,Y.-Z.
EPI758745	HA	India	2015	A/turkey/India/01CA01/2015		Other Database Import	Tosh,C.; Nagarajan,S.; Kumar,M.; Murugkar,H.V.; Venkatesh,G.; Shukla,S.; Mishra,A.; Mishra,P.; Agarwal,S.; Singh,B.; Dubey,P.; Tripathi,S.; Kulkarni,D.D.
EPI837541	HA	Korea, Republic of	2015-Jan-11	A/breeder duck/Korea/H2086/2015		Animal and Plant Quarantine Agency (S-2026)
EPI750154	HA	Taiwan	2015-Jan-12	A/goose/Taiwan/01022/2015		Other Database Import	Lee,M.S.; Chen,L.H.; Chen,Y.P.; Liu,Y.P.; Li,W.C.; Lin,Y.L.; Lee,F.; Ting,L.J.
EPI588976	HA	Taiwan	2015-Jan-13	A/duck/Taiwan/a068/2015	Animal Health Research Institute	Animal Health Research Institute	Yu-Ju,Lin; Li-Hsuan,Chen; Wan-Chen,Li; Yu-Pin,Liu; Ming-Shiuh,Lee; Ming-Chu,Cheng; Hsiang-Jung,Tsai
EPI837542	HA	Korea, Republic of	2015-Jan-14	A/mallard/Korea/H2102/2015		Animal and Plant Quarantine Agency (S-2026)
EPI590692	HA	United States	2015-Jan-29	A/chicken/Washington/3490-18/2015		Other Database Import	Killian,M.L.
EPI965238	HA	Bangladesh	2015-Jul-10	A/duck/Bangladesh/25893/2015		Other Database Import	Marinova-Petkova,A.; Barman,S.; Hasan,M.K.; Akhtar,S.; Turner,J.C.; Franks,J.; Walker,D.; Seiler,P.; Friedman,K.; Kercher,L.; Kayali,G.; Jones-Engel,L.; McKenzie,P.; Krauss,S.; Webby,R.J.; Feeroz,M.M.; Webster,R.G.
EPI668895	HA	China	2015-Jul-10	A/Yunnan/DQ002/2015(H5N6)		Institute of Microbiology, Chinese Academy of Sciences
EPI669760	HA	China	2015-Jul-14	A/Bar-headed Goose/Qinghai/BTY2/2015_H5N1	State Key Laboratory of Virology and Wuhan Institute of Virology, Chinese Academy of Sciences	Institute of Microbiology, Chinese Academy of Sciences	Jianjun, Chen
EPI669776	HA	China	2015-Jul-14	A/Great black-headed Gull/Qinghai/YO6/2015_H5N1	State Key Laboratory of Virology and Wuhan Institute of Virology, Chinese Academy of Sciences	Institute of Microbiology, Chinese Academy of Sciences	Jianjun, Chen
EPI669776	HA	China	2015-Jul-14	A/Great_black-headed_Gull/Qinghai/YO6/2015_H5N1	State Key Laboratory of Virology and Wuhan Institute of Virology, Chinese Academy of Sciences	Institute of Microbiology, Chinese Academy of Sciences	Jianjun, Chen
EPI760123	HA	China	2015-Jun-02	A/peacock/Yunnan/1/2015		Other Database Import	Hu,T.; Zhao,H.; Zhang,Y.; Zhang,W.; Kong,Q.; Zhang,Z.; Cui,Q.; Qiu,W.; Deng,B.; Fan,Q.; Zhang,F.
EPI758785	HA	India	2015-Mar-01	A/duck/India/03CA01/2015		Other Database Import	Tosh,C.; Nagarajan,S.; Kumar,M.; Murugkar,H.V.; Venkatesh,G.; Shukla,S.; Mishra,A.; Mishra,P.; Agarwal,S.; Singh,B.; Dubey,P.; Tripathi,S.; Kulkarni,D.D.
EPI590733	HA	United_States	2015-Mar-12	A/chicken/Kansas/8395-3/2015		Other Database Import	Killian,M.L.
EPI669129	HA	Israel	2015-Mar-22	A/chicken/Qatanna/468/2015		Other Database Import	Shkoda,I.; Lapin,K.; Simanov,L.; Lublin,A.
EPI643069	HA	Indonesia	2015-Mar-24	A/Indonesia/NIHRD/15023/2015	National Institute of Health Research and Development	National Institute of Health Research and Development	HA,Pawestri;AA,Nugraha;KD,Puspa;HD,Ikawati;V,Setiawaty
EPI643072	HA	Indonesia	2015-Mar-25	A/Indonesia/NIHRD15028/2015	National Institute of Health Research and Development	National Institute of Health Research and Development	HA,Pawestri;KD,Puspa;HD,Ikawati;AA,Nugraha;V,Setiawaty
EPI661679	HA	China	2015-Mar-26	A/duck/Guangdong/03.26_DGCPLB024-O/2015(H5N6)		Institute of Microbiology, Chinese Academy of Sciences
EPI590740	HA	United States	2015-Mar-26	A/turkey/Minnesota/9845-4/2015		Other Database Import	Killian,M.L.
EPI590740	HA	United_States	2015-Mar-26	A/turkey/Minnesota/9845-4/2015		Other Database Import	Killian,M.L.
EPI657802	HA	China	2015-May-06	A/chicken/Jiangxi/05.06_NCDZT1174-O/2015(H5N6)		Institute of Microbiology, Chinese Academy of Sciences
EPI669808	HA	China	2015-May-12	A/Black-necked Grebe/Inner Mongolia/Lung3/2015_H5N1	Institute of Pathogen Biology, Taishan Medical College	Institute of Microbiology, Chinese Academy of Sciences	Weifeng, Shi
EPI817165	HA	Vietnam	2015-Nov-10	A/muscovy duck/Vietnam/LBM818/2015		Other Database Import	Soda,K.; Nguyen,K.H.; Le,Q.M.; Ito,T.; Maegaki,S.
EPI817165	HA	Vietnam	2015-Nov-10	A/muscovy_duck/Vietnam/LBM818/2015		Other Database Import	Soda,K.; Nguyen,K.H.; Le,Q.M.; Ito,T.; Maegaki,S.
EPI703986	HA	Vietnam	2015-Nov-11	A/muscovy duck/Vietnam/HU3-159/2015		Other Database Import	Nguyen,T.L.; Okamatsu,M.; Kida,H.; Sakoda,Y.; Hatamachi,J.
EPI895112	HA	China	2015-Nov-15	A/duck/Hubei/ZYSYF24/2015		Other Database Import	Chen,L.J.; Tian,J.H.; Lin,X.D.; Liao,Y.; Shi,M.; Zhang,Y.Z.
EPI957118	HA	China	2015-Sep-11	A/duck/Hunan/HN163/2015		Wuhan Institute of Virology
EPI956262	HA	China	2015-Sep-13	A/chicken/Hunan/HN251/2015		Wuhan Institute of Virology
EPI957824	HA	China	2015-Sep-13	A/duck/Hunan/HN214/2015		Wuhan Institute of Virology
EPI958776	HA	China	2015-Sep-13	A/goose/Hunan/HN57/2015		Wuhan Institute of Virology
EPI845368	HA	United States	2016-Aug-12	A/mallard/Alaska/AH0088535/2016		Other Database Import	Killian,M.L.
EPI962345	HA	Japan	2016-Dec-16	A/chicken/Hokkaido/002/2017	Graduate School of Veterinary Medicine, Hokkaido University	Hokkaido University
EPI961933	HA	Taiwan	2016-Dec-21	A/chicken/Taiwan/x37/2016		Animal Health Research Institute	Yu-Ju,Lin; Li-Hsuan,Chen; Wan-Chen,Li; Yen-Ping,Chen; Yu-Pin,Liu; Fan,Lee; Wen-Jane,Tu
EPI962423	HA	Japan	2016-Dec-21	A/whooper swan/Iwate/11/2016		Hokkaido University
EPI895119	HA	China	2016-Feb-19	A/chicken/Taishun/TS12/2016		Other Database Import	Chen,L.J.; Tian,J.H.; Lin,X.D.; Liao,Y.; Shi,M.; Zhang,Y.Z.
EPI942073	HA	China	2016-Feb-21	A/duck/Hubei/ZYSYF2/2016		Other Database Import	Chen,L.J.; Tian,J.H.; Lin,X.D.; Liao,Y.; Shi,M.; Zhang,Y.Z.
EPI760002	HA	China	2016	A/duck/Guangdong/01.01_SZSGXJK003-G/2016	Institute of Microbiology, Chinese Academy of Sciences	Institute of Microbiology, Chinese Academy of Sciences
EPI693866	HA	China	2016-Jan-06	A/Shenzhen/TH002/2016(H5N6)	CAS Key Laboratory of Pathogenic Microbiology and Immunology, Institute of Microbiology, Chinese Academy of Sciences	Institute of Microbiology, Chinese Academy of Sciences
EPI774434	HA	China	2016-May-01	A/Brown-headed Gull/Qinghai/ZTO1-LU/2016	State Key Laboratory of Virology and Wuhan Institute of Virology, Chinese Academy of Sciences	Wuhan Institute of Virology
EPI774318	HA	China	2016-May-14	A/Bar-headed Goose/Qinghai/BTY13-B/2016	State Key Laboratory of Virology and Wuhan Institute of Virology, Chinese Academy of Sciences	Wuhan Institute of Virology
EPI866085	HA	Korea,_Republic_of	2016-Nov-16	A/chicken/Korea/HN1/2016(H5N6)		Animal and Plant Quarantine Agency (S-2026)
EPI888450	HA	Japan	2016-Nov-19	A/black_swan/Akita/1/2016		Other Database Import	Okamatsu,M.; Hiono,T.; Matsuno,K.; Kida,H.; Sakoda,Y.
EPI867580	HA	Japan	2016-Nov-19	A/crane/Kagoshima/KU-4/2016(H5N6)	Kagoshima University	Kagoshima University

## Sheet: NP
Table S1. GISAID acknowledgements for NP segment.
Isolate ID	Segment	Country	Collection date	Isolate name	Originating Laboratory	Submitting Laboratory	Authors
EPI89458	NP	China	1979	A/duck/Hong-Kong/784/1979		Other Database Import
EPI590170	NP	Hong-Kong-(SAR)	1980	A/duck/Hong-Kong/819/1980		Other Database Import	Kida,H.; Sakoda,Y.; Okamatsu,M.; Matsuno,K.; Masani,K.; Hatamachi,J.
EPI590184	NP	Hong-Kong-(SAR)	1980	A/duck/Hong-Kong/820/1980		Other Database Import	Kida,H.; Sakoda,Y.; Okamatsu,M.; Matsuno,K.; Masani,K.; Hatamachi,J.
EPI5785	NP	China	1996	A/Goose/Guangdong/1/96		Other Database Import
EPI333	NP	Japan	1997	A/parakeet/Chiba/1/97		Other Database Import
EPI81885	NP	China	1999	A/chicken/Guangxi/9/99		Other Database Import
EPI81879	NP	China	2001	A/chicken/Guangdong/56/01		Other Database Import
EPI1482	NP	Japan	2001	A/chicken/Osaka/aq58/2001		Other Database Import
EPI236552	NP	Hong-Kong-(SAR)	2001	A/Duck/Hong-Kong/380.5/2001		Other Database Import	Kim,L.M.; Scott,M.A.; Suarez,D.L.; Spackman,E.; Swayne,D.E.; Afonso,C.L.
EPI268778	NP	China	2001	A/duck/Shantou/1197/2001		Other Database Import	Huang,K.; Bahl,J.; Fan,X.; Vijaykrishna,D.; Cheung,C.; Webby,R.J.; Webster,R.G.; Chen,H.; Smith,G.J.D.; Peiris,M.J.S.; Guan,Y.
EPI235800	NP	China	2002	A/chicken/Jilin/hd/2002		Other Database Import	Liao,X.; Zhang,X.; Wang,J.; Yu,J.; Jin,N.
EPI102245	NP	Taiwan	2002	A/chicken/Taiwan/0222/02		Other Database Import
EPI102261	NP	Taiwan	2002	A/chicken/Taiwan/0408/02		Other Database Import
EPI102247	NP	Taiwan	2002	A/chicken/Taiwan/PF1/02		Other Database Import
EPI102251	NP	Taiwan	2002	A/chicken/Taiwan/PF3/02		Other Database Import
EPI1536	NP	Japan	2002	A/chicken/Yokohama/aq134/2002		Other Database Import
EPI268730	NP	China	2002	A/duck/Shantou/1706/2002		Other Database Import	Huang,K.; Bahl,J.; Fan,X.; Vijaykrishna,D.; Cheung,C.; Webby,R.J.; Webster,R.G.; Chen,H.; Smith,G.J.D.; Peiris,M.J.S.; Guan,Y.
EPI268728	NP	China	2002	A/duck/Shantou/2061/2002		Other Database Import	Huang,K.; Bahl,J.; Fan,X.; Vijaykrishna,D.; Cheung,C.; Webby,R.J.; Webster,R.G.; Chen,H.; Smith,G.J.D.; Peiris,M.J.S.; Guan,Y.
EPI376199	NP	China	2003-Apr-01	A/duck/Fujian/MH/2003		Other Database Import	Fu,G.; Huang,Y.
EPI184114	NP	Pakistan	2003	A/chicken/Karachi/NARC-23/2003		Other Database Import	Abbas,M.A.; Spackman,E.; Ahmed,Z.; Naeem,K.; Siddique,N.; Swayne,D.; Sarmento,L.; Hameed,A.
EPI25028	NP	China	2004	A/chicken/Guangdong/178/04		Other Database Import
EPI25013	NP	China	2004	A/chicken/Guangdong/191/04		Other Database Import
EPI167155	NP	Thailand	2004	A/chicken/Kohn-Kaen/NIAH330/2004		Other Database Import
EPI171048	NP	Vietnam	2004	A/chicken/Vietnam/933/2004		Other Database Import
EPI268810	NP	China	2004	A/duck/Hunan/3748/2004		Other Database Import	Huang,K.; Bahl,J.; Fan,X.; Vijaykrishna,D.; Cheung,C.; Webby,R.J.; Webster,R.G.; Chen,H.; Smith,G.J.D.; Peiris,M.J.S.; Guan,Y.
EPI107182	NP	Thailand	2004	A/open-billed-stork/Nakhonsawan/BBD0104F/2004		Other Database Import
EPI170709	NP	Vietnam	2005-Dec-06	A/duck/Vietnam/203/2005		Other Database Import
EPI170625	NP	Vietnam	2005-Dec-16	A/duck/Vietnam/215/2005		Other Database Import
EPI170618	NP	Vietnam	2005-Dec-18	A/chicken/Vietnam/216/2005		Other Database Import
EPI153618	NP	Israel	2005	A/chicken/Israel/793/2005		Other Database Import
EPI227013	NP	Vietnam	2005	A/chicken/Ninh-Binh/209/2005		Other Database Import	Kim,L.M.; Scott,M.A.; Suarez,D.L.; Spackman,E.; Swayne,D.E.; Afonso,C.L.
EPI275871	NP	China	2005	A/chicken/Sichuan/81/2005		Other Database Import	Li,Y.; Shi,J.; Zhong,G.; Deng,G.; Tian,G.; Ge,J.; Zeng,X.; Song,J.; Zhao,D.; Liu,L.; Jiang,Y.; Guan,Y.; Bu,Z.; Chen,H.
EPI47321	NP	Vietnam	2005	A/chicken/Viet-Nam/10/2005		Other Database Import
EPI47340	NP	Vietnam	2005	A/chicken/Viet-Nam/11/2005		Other Database Import
EPI47302	NP	Vietnam	2005	A/chicken/Viet-Nam/9/2005		Other Database Import
EPI268666	NP	China	2005	A/duck/Fujian/629/2005		Other Database Import	Huang,K.; Bahl,J.; Fan,X.; Vijaykrishna,D.; Cheung,C.; Webby,R.J.; Webster,R.G.; Chen,H.; Smith,G.J.D.; Peiris,M.J.S.; Guan,Y.
EPI268674	NP	China	2005	A/duck/Guangxi/141/2005		Other Database Import	Huang,K.; Bahl,J.; Fan,X.; Vijaykrishna,D.; Cheung,C.; Webby,R.J.; Webster,R.G.; Chen,H.; Smith,G.J.D.; Peiris,M.J.S.; Guan,Y.
EPI268691	NP	China	2005	A/duck/Shantou/2472/2005		Other Database Import	Huang,K.; Bahl,J.; Fan,X.; Vijaykrishna,D.; Cheung,C.; Webby,R.J.; Webster,R.G.; Chen,H.; Smith,G.J.D.; Peiris,M.J.S.; Guan,Y.
EPI110944	NP	Thailand	2005	A/open-billed-stork/Nakhonsawan/BBD2416F/05		Other Database Import
EPI167166	NP	Thailand	2005	A/pigeon/Thailand/VSMU-13-KRI/2005		Other Database Import
EPI363520	NP	China	2006-Feb-01	A/duck/Guizhou/1084/2006		Other Database Import	Huang,K.; Zhu,H.; Fan,X.; Wang,J.; Cheung,C.L.; Duan,L.; Hong,W.; Liu,Y.; Li,L.; Smith,D.K.; Chen,H.; Webster,R.G.; Webby,R.J.; Peiris,M.; Guan,Y.; Cheung,C. L.
EPI122599	NP	China	2006	A/bird/Guangxi/H1/2006		Other Database Import
EPI47131	NP	Afghanistan	2006	A/chicken/Afghanistan/1207/2006		Other Database Import
EPI58569	NP	Afghanistan	2006	A/chicken/Afghanistan/1573-47/2006		Other Database Import
EPI58588	NP	Afghanistan	2006	A/chicken/Afghanistan/1573-65/2006		Other Database Import
EPI60317	NP	Afghanistan	2006	A/chicken/Afghanistan/1573-7/2006		Other Database Import
EPI275831	NP	China	2006	A/chicken/Ningxia/24/2006		Other Database Import	Li,Y.; Shi,J.; Zhong,G.; Deng,G.; Tian,G.; Ge,J.; Zeng,X.; Song,J.; Zhao,D.; Liu,L.; Jiang,Y.; Guan,Y.; Bu,Z.; Chen,H.
EPI408099	NP	Myanmar	2006	A/chicken/Pyigyitagon/204/2006		Other Database Import	Saito,T.; Watanabe,C.; Hayashi,T.; Uchida,Y.; Myint,W.W.; Thein,W.Z.; Takemae,N.; Mase,M.; Okamatsu,M.; Mar,A.; Mon,C.C.; Gawng,L.T.; Sann,K.; Kyi,T.A.; Yamaguchi,S.
EPI368251	NP	Thailand	2006	A/duck/Thailand/TS01/2006		Other Database Import	Songserm,T.; Wiboon ut,S.; Kanchongkittiphon,W.; Na Ek,P.; Thitithanyanont,A.
EPI276079	NP	China	2006	A/wild-duck/Liaoning/8/2006		Other Database Import	Li,Y.; Shi,J.; Zhong,G.; Deng,G.; Tian,G.; Ge,J.; Zeng,X.; Song,J.; Zhao,D.; Liu,L.; Jiang,Y.; Guan,Y.; Bu,Z.; Chen,H.
EPI363640	NP	China	2006-Jul-01	A/duck/Shantou/14167/2006		Other Database Import	Huang,K.; Zhu,H.; Fan,X.; Wang,J.; Cheung,C.L.; Duan,L.; Hong,W.; Liu,Y.; Li,L.; Smith,D.K.; Chen,H.; Webster,R.G.; Webby,R.J.; Peiris,M.; Guan,Y.; Cheung,C. L.
EPI363456	NP	China	2006-Mar-01	A/duck/Guangxi/1074/2006		Other Database Import	Huang,K.; Zhu,H.; Fan,X.; Wang,J.; Cheung,C.L.; Duan,L.; Hong,W.; Liu,Y.; Li,L.; Smith,D.K.; Chen,H.; Webster,R.G.; Webby,R.J.; Peiris,M.; Guan,Y.; Cheung,C. L.
EPI177763	NP	Pakistan	2006-May-02	A/chicken/Pakistan/UDL-01/2006		Other Database Import
EPI365085	NP	China	2006-Nov-01	A/duck/Fujian/10950/2006		Other Database Import	Huang,K.; Zhu,H.; Fan,X.; Wang,J.; Cheung,C.L.; Duan,L.; Hong,W.; Liu,Y.; Li,L.; Smith,D.K.; Chen,H.; Webster,R.G.; Webby,R.J.; Peiris,M.; Guan,Y.; Cheung,C. L.
EPI363852	NP	China	2006-Sep-01	A/duck/Fujian/9062/2006		Other Database Import	Huang,K.; Zhu,H.; Fan,X.; Wang,J.; Cheung,C.L.; Duan,L.; Hong,W.; Liu,Y.; Li,L.; Smith,D.K.; Chen,H.; Webster,R.G.; Webby,R.J.; Peiris,M.; Guan,Y.; Cheung,C. L.
EPI365012	NP	China	2007-Dec-01	A/duck/Fujian/7844/2007		Other Database Import	Huang,K.; Zhu,H.; Fan,X.; Wang,J.; Cheung,C.L.; Duan,L.; Hong,W.; Liu,Y.; Li,L.; Smith,D.K.; Chen,H.; Webster,R.G.; Webby,R.J.; Peiris,M.; Guan,Y.; Cheung,C. L.
EPI365020	NP	China	2007-Dec-01	A/duck/Fujian/8349/2007		Other Database Import	Huang,K.; Zhu,H.; Fan,X.; Wang,J.; Cheung,C.L.; Duan,L.; Hong,W.; Liu,Y.; Li,L.; Smith,D.K.; Chen,H.; Webster,R.G.; Webby,R.J.; Peiris,M.; Guan,Y.; Cheung,C. L.
EPI180318	NP	Israel	2007-Dec-02	A/chicken/Israel/951/2007		Other Database Import
EPI181611	NP	Indonesia	2007	A/chicken/East-Java/UT6044/2007		Other Database Import
EPI164575	NP	Lao,-People's-Democratic-Republic	2007	A/chicken/Laos/P0171/2007		Other Database Import
EPI286161	NP	Vietnam	2007	A/duck/Soc-Trang/07-25/2007		Other Database Import	Kim,L.M.; Scott,M.A.; Suarez,D.L.; Spackman,E.; Swayne,D.E.; Afonso,C.L.
EPI620837	NP	Vietnam	2007	A/duck/Vietnam-Hau-Giang/NCVD-12/2007		Other Database Import	Pantin Jackwood,M.J.; Spackman,E.; Suarez,D.L.; Wasilenko,J.; Sarmento,L.; Shepherd,E.; Smith,D.; Lee,S.; Lone,N.A.
EPI350625	NP	Vietnam	2007	A/duck/Vietnam/NCVD-102/2007	National Centre of Veterinary Diagnostics	Centers for Disease Control and Prevention	Davis,Todd; Rivailler,Pierre; Nguyen,Tung
EPI350667	NP	Vietnam	2007	A/duck/Vietnam/NCVD-118/2007	National Centre of Veterinary Diagnostics	Centers for Disease Control and Prevention	Davis,Todd; Rivailler,Pierre; Nguyen,Tung
EPI221604	NP	Vietnam	2007	A/Muscovy-duck/Ca-Mau/07-04/2007		Other Database Import	Kim,L.M.; Scott,M.A.; Suarez,D.L.; Spackman,E.; Swayne,D.E.; Afonso,C.L.
EPI569708	NP	China	2007-Jan-11	A/chicken/Jiangsu/01/2007		Other Database Import	Zhao,M.; Gu,X.; Chen,H.; Liu,Q.; Zhong,L.; Huang,J.; Gu,M.; Liu,X.
EPI364036	NP	China	2007-Jul-01	A/duck/Shantou/1240/2007		Other Database Import	Huang,K.; Zhu,H.; Fan,X.; Wang,J.; Cheung,C.L.; Duan,L.; Hong,W.; Liu,Y.; Li,L.; Smith,D.K.; Chen,H.; Webster,R.G.; Webby,R.J.; Peiris,M.; Guan,Y.; Cheung,C. L.
EPI365114	NP	China	2007-Jun-01	A/duck/Fujian/1879/2007		Other Database Import	Huang,K.; Zhu,H.; Fan,X.; Wang,J.; Cheung,C.L.; Duan,L.; Hong,W.; Liu,Y.; Li,L.; Smith,D.K.; Chen,H.; Webster,R.G.; Webby,R.J.; Peiris,M.; Guan,Y.; Cheung,C. L.
EPI364985	NP	China	2007-Nov-01	A/duck/Fujian/6841/2007		Other Database Import	Huang,K.; Zhu,H.; Fan,X.; Wang,J.; Cheung,C.L.; Duan,L.; Hong,W.; Liu,Y.; Li,L.; Smith,D.K.; Chen,H.; Webster,R.G.; Webby,R.J.; Peiris,M.; Guan,Y.; Cheung,C. L.
EPI610324	NP	China	2007-Nov-20	A/chicken/Guangxi/LF/2007		Other Database Import	Peng,Y.; Xie,Z.; Liu,J.; Pang,Y.; Xie,L.; Luo,S.; Fan,Q.
EPI364939	NP	China	2007-Sep-01	A/duck/Fujian/4676/2007		Other Database Import	Huang,K.; Zhu,H.; Fan,X.; Wang,J.; Cheung,C.L.; Duan,L.; Hong,W.; Liu,Y.; Li,L.; Smith,D.K.; Chen,H.; Webster,R.G.; Webby,R.J.; Peiris,M.; Guan,Y.; Cheung,C. L.
EPI560122	NP	China	2008-Apr-01	A/chicken/Anhui/1/2008		Other Database Import	Zhu,Y.
EPI350660	NP	Vietnam	2008-Dec-01	A/duck/Vietnam/NCVD-140/2008	National Centre of Veterinary Diagnostics	Centers for Disease Control and Prevention	Davis,Todd; Rivailler,Pierre; Nguyen,Tung
EPI350744	NP	Vietnam	2008-Dec-01	A/duck/Vietnam/NCVD-160/2008	National Centre of Veterinary Diagnostics	Centers for Disease Control and Prevention	Davis,Todd; Rivailler,Pierre; Nguyen,Tung
EPI610279	NP	China	2008-Dec-12	A/chicken/Guangxi/DX/2008		Other Database Import	Peng,Y.; Xie,Z.; Liu,J.; Pang,Y.; Xie,L.; Luo,S.; Fan,Q.
EPI470477	NP	China	2008	A/chicken/Hong-Kong/NT155/2008		Other Database Import	Lam,T.T.Y.; Wang,J.; Shen,Y.; Zhou,B.; Duan,L.; Cheung,C.L.; Ma,C.; Lycett,S.J.; Leung,C.Y.H.; Chen,X.; Li,L.; Hong,W.; Chai,Y.; Zhou,L.; Liang,H.; Ou,Z.; Liu,Y.; Farooqui,A.; Kelvin,D.J.; Poon,L.L.M.; Smith,D.K.; Pybus,O.G.; Leung,G.M.; Shu,Y.; Webster,R.G.; Webby,R.J.; Peiris,J.S.M.; Rambaut,A.; Zhu,H.; Guan,Y.
EPI349855	NP	Vietnam	2008	A/chicken/Vietnam/NCVD-033/2008	National Centre of Veterinary Diagnostics	Centers for Disease Control and Prevention	Davis,Todd; Rivailler,Pierre; Nguyen,Tung
EPI350513	NP	Vietnam	2008	A/duck/Vietnam/NCVD-009/2008	National Centre of Veterinary Diagnostics	Centers for Disease Control and Prevention	Davis,Todd; Rivailler,Pierre; Nguyen,Tung
EPI177795	NP	Pakistan	2008-Jan-09	A/chicken/Pakistan/UDL-01/2008		Other Database Import
EPI349841	NP	Vietnam	2008-May-01	A/chicken/Vietnam/NCVD-03/2008	National Centre of Veterinary Diagnostics	Centers for Disease Control and Prevention	Davis,Todd; Rivailler,Pierre; Nguyen,Tung
EPI299285	NP	Japan	2008-Oct-08	A/avian/Japan/8KI0135/2008		Other Database Import	The NIAID Influenza Genome Sequencing Consortium
EPI1007369	NP	China	2008-Oct-09	A/duck/Hubei/S4170/2008		Other Database Import	Wang,G.; Deng,G.; Shi,J.; Luo,W.; Zhang,G.; Zhang,Q.; Liu,L.; Jiang,Y.; Li,C.; Sriwilaijaroen,N.; Hiramatsu,H.; Suzuki,Y.; Kawaoka,Y.; Chen,H.
EPI540304	NP	Bangladesh	2009-Dec-23	A/duck/Bangladesh/1574/2009	Institute of Epidemiology Disease Control and Research (IEDCR) & Bangladesh National Influenza Centre (NIC)	Centers for Disease Control and Prevention	Gerloff, Nancy; Simpson, Natosha; Davis, C. Todd
EPI350151	NP	Vietnam	2009	A/chicken/Vietnam/NCVD-390/2009	National Centre of Veterinary Diagnostics	Centers for Disease Control and Prevention	Davis,Todd; Rivailler,Pierre; Nguyen,Tung
EPI470371	NP	China	2009	A/duck/Jiangxi/8032/2009		Other Database Import	Lam,T.T.Y.; Wang,J.; Shen,Y.; Zhou,B.; Duan,L.; Cheung,C.L.; Ma,C.; Lycett,S.J.; Leung,C.Y.H.; Chen,X.; Li,L.; Hong,W.; Chai,Y.; Zhou,L.; Liang,H.; Ou,Z.; Liu,Y.; Farooqui,A.; Kelvin,D.J.; Poon,L.L.M.; Smith,D.K.; Pybus,O.G.; Leung,G.M.; Shu,Y.; Webster,R.G.; Webby,R.J.; Peiris,J.S.M.; Rambaut,A.; Zhu,H.; Guan,Y.
EPI350807	NP	Vietnam	2009	A/duck/Vietnam/NCVD-364/2009	National Centre of Veterinary Diagnostics	Centers for Disease Control and Prevention	Davis,Todd; Rivailler,Pierre; Nguyen,Tung
EPI350814	NP	Vietnam	2009	A/duck/Vietnam/NCVD-365/2009	National Centre of Veterinary Diagnostics	Centers for Disease Control and Prevention	Davis,Todd; Rivailler,Pierre; Nguyen,Tung
EPI350856	NP	Vietnam	2009	A/duck/Vietnam/NCVD-368/2009	National Centre of Veterinary Diagnostics	Centers for Disease Control and Prevention	Davis,Todd; Rivailler,Pierre; Nguyen,Tung
EPI350870	NP	Vietnam	2009	A/duck/Vietnam/NCVD-376/2009	National Centre of Veterinary Diagnostics	Centers for Disease Control and Prevention	Davis,Todd; Rivailler,Pierre; Nguyen,Tung
EPI351529	NP	Vietnam	2009	A/muscovy-duck/Vietnam/NCVD-384/2009	National Centre of Veterinary Diagnostics	Centers for Disease Control and Prevention	Davis,Todd; Rivailler,Pierre; Nguyen,Tung
EPI345679	NP	China	2009-Jun-01	A/duck/Eastern-China/10/2009		Other Database Import	Zhao,G.; Liu,X.
EPI500967	NP	China	2009-Mar-05	A/Duck/Guangdong/S1663/2009	Harbin Veterinary Research Institute (CAAS)	Harbin Veterinary Research Institute (CAAS)	Wang, G.J.; Deng,G.H.; Shi, J.Z.; Luo, W.Y.; Zhang, G.Q.; Zhang, Q.Y.; Liu, L.L.; Jiang, Y.P.; Li, C.J.; Sriwilaijaroen, N.; Hiramatsu, H.; Suzuki, Y.; Kawaoka, Y.; Chen, H.L.
EPI471868	NP	China	2009-Nov-14	A/duck/Guangxi/GXd-4/2009		Other Database Import	Xie,Z.; Zhou,C.; Peng,Y.; Liu,J.; Pang,Y.; Deng,X.; Xie,L.; Fan,Q.
EPI314013	NP	China	2009-Sep-10	A/duck/Tibet/S2/2009		Other Database Import	Suolang,S.; Jin,M.
EPI350471	NP	Vietnam	2010-Apr-01	A/chicken/Vietnam/NCVD-412/2010	National Centre of Veterinary Diagnostics	Centers for Disease Control and Prevention	Davis,Todd; Rivailler,Pierre; Nguyen,Tung
EPI1035780	NP	China	2010-Apr-08	A/duck/Guangxi/058/2010		Other Database Import	Li,M.; Xie,Z.X.; Xie,L.J.; Deng,X.W.; Xie,Q.Z.; Liu,J.B.; Fan,Q.; Pang,Y.S.; Luo,S.S.
EPI618038	NP	Georgia	2010-Apr-28	A/domestic-duck/Republic-of-Georgia/2/2010		Other Database Import	Wentworth,D.E.; Halpin,R.A.; Lin,X.; Simenauer,A.; Akopov,A.; Mohan,M.; Fedorova,N.; Tsitrin,T.; Puri,V.; Stockwell,T.; Amedeo,P.; Bishop,B.; Gupta,N.; Hoover,J.; Katzel,D.; Schobel,S.; Shrivastava,S.; Thovarai,V.; Bao,Y.; Sanders,R.; Zhdanov,S.; Kiryutin,B.; Lipman,D.J.; Tatusova,T.; Fouchier,R.A.M.
EPI501039	NP	China	2010-Dec-10	A/Duck/Guangxi/S4111/2010	Harbin Veterinary Research Institute (CAAS)	Harbin Veterinary Research Institute (CAAS)	Wang, G.J.; Deng,G.H.; Shi, J.Z.; Luo, W.Y.; Zhang, G.Q.; Zhang, Q.Y.; Liu, L.L.; Jiang, Y.P.; Li, C.J.; Sriwilaijaroen, N.; Hiramatsu, H.; Suzuki, Y.; Kawaoka, Y.; Chen, H.L.
EPI501095	NP	China	2010-Dec-10	A/Duck/Hunan/S4273/2010	Harbin Veterinary Research Institute (CAAS)	Harbin Veterinary Research Institute (CAAS)	Wang, G.J.; Deng,G.H.; Shi, J.Z.; Luo, W.Y.; Zhang, G.Q.; Zhang, Q.Y.; Liu, L.L.; Jiang, Y.P.; Li, C.J.; Sriwilaijaroen, N.; Hiramatsu, H.; Suzuki, Y.; Kawaoka, Y.; Chen, H.L.
EPI350165	NP	Vietnam	2010-Feb-01	A/chicken/Vietnam/NCVD-395/2010	National Centre of Veterinary Diagnostics	Centers for Disease Control and Prevention	Davis,Todd; Rivailler,Pierre; Nguyen,Tung
EPI383172	NP	China	2010-Feb-10	A/chicken/Jiangsu/k0402/2010		Other Database Import	Hu,J.; Zhao,K.; Liu,X.; Wang,X.; Chen,Z.
EPI470422	NP	China	2010	A/duck/Fujian/6390/2010		Other Database Import	Lam,T.T.Y.; Wang,J.; Shen,Y.; Zhou,B.; Duan,L.; Cheung,C.L.; Ma,C.; Lycett,S.J.; Leung,C.Y.H.; Chen,X.; Li,L.; Hong,W.; Chai,Y.; Zhou,L.; Liang,H.; Ou,Z.; Liu,Y.; Farooqui,A.; Kelvin,D.J.; Poon,L.L.M.; Smith,D.K.; Pybus,O.G.; Leung,G.M.; Shu,Y.; Webster,R.G.; Webby,R.J.; Peiris,J.S.M.; Rambaut,A.; Zhu,H.; Guan,Y.
EPI448072	NP	Bangladesh	2010-Jan-04	A/chicken/Bangladesh/1012/2010	Institute of Epidemiology Disease Control and Research (IEDCR) & Bangladesh National Influenza Centre (NIC)	Centers for Disease Control and Prevention	Gerloff, Nancy; Simpson, Natosha; Poh, Mee;Davis, Todd
EPI442010	NP	China	2010-Jan-27	A/goose/Guangdong/k0103/2010		Other Database Import	Zhao,K.; Gu,M.; Zhong,L.; Duan,Z.; Zhang,Y.; Zhu,Y.; Zhao,G.; Zhao,M.; Chen,Z.; Hu,S.; Liu,W.; Liu,X.; Peng,D.
EPI341473	NP	Cambodia	2010-Jan-28	A/chicken/Cambodia/TKCMB5T/2010		Other Database Import	Buchy,P.; Mardy,S.; San,S.
EPI503991	NP	Korea,-Republic-of	2010-Mar-01	A/wild-duck/SH38-64/2010		Other Database Import	Lee,K. J.; Choi,J. G.; Kang,H. M.; Song,B. M.; Lee,E. K.; Lee,H. S.; Lee,Y. J.
EPI500855	NP	China	2010-Mar-03	A/Chicken/Guangdong/S1312/2010	Harbin Veterinary Research Institute (CAAS)	Harbin Veterinary Research Institute (CAAS)	Wang, G.J.; Deng,G.H.; Shi, J.Z.; Luo, W.Y.; Zhang, G.Q.; Zhang, Q.Y.; Liu, L.L.; Jiang, Y.P.; Li, C.J.; Sriwilaijaroen, N.; Hiramatsu, H.; Suzuki, Y.; Kawaoka, Y.; Chen, H.L.
EPI1007169	NP	China	2010-Mar-05	A/chicken/Guangdong/S1453/2010		Other Database Import	Wang,G.; Deng,G.; Shi,J.; Luo,W.; Zhang,G.; Zhang,Q.; Liu,L.; Jiang,Y.; Li,C.; Sriwilaijaroen,N.; Hiramatsu,H.; Suzuki,Y.; Kawaoka,Y.; Chen,H.
EPI401603	NP	China	2010-May-08	A/duck/Guangxi/GXd-5/2010		Other Database Import	Xie,Z.; Xie,L.; Zhou,C.; Liu,J.; Pang,Y.; Deng,X.; Fan,Q.; Peng,Y.
EPI425553	NP	Vietnam	2010-Nov-01	A/duck/Vietnam/NCVD-645/2010	National Centre of Veterinary Diagnostics	Centers for Disease Control and Prevention
EPI471876	NP	China	2010-Nov-11	A/duck/Guangxi/GXd-6/2010		Other Database Import	Xie,Z.; Zhou,C.; Peng,Y.; Liu,J.; Pang,Y.; Deng,X.; Xie,L.; Fan,Q.
EPI348860	NP	Vietnam	2010-Nov-16	A/duck/Vietnam/NCVD-456/2010	National Institute of Hygiene and Epidemiology	Centers for Disease Control and Prevention	Davis,Todd; Rivailler,Pierre; Nguyen,Tung
EPI540352	NP	Bangladesh	2010-Oct-27	A/duck/Bangladesh/1766/2010	Institute of Epidemiology Disease Control and Research (IEDCR) & Bangladesh National Influenza Centre (NIC)	Centers for Disease Control and Prevention	Gerloff, Nancy; Simpson, Natosha; Davis, C. Todd
EPI424745	NP	Vietnam	2010-Oct-29	A/duck/Vietnam/NCVD-784/2010	National Centre of Veterinary Diagnostics	Centers for Disease Control and Prevention
EPI540530	NP	Bangladesh	2011-Apr-03	A/duck/Bangladesh/727/2011	Institute of Epidemiology Disease Control and Research (IEDCR) & Bangladesh National Influenza Centre (NIC)	Centers for Disease Control and Prevention	Gerloff, Nancy; Simpson, Natosha; Davis, C. Todd
EPI424897	NP	Vietnam	2011-Aug-04	A/duck/Vietnam/NCVD-935/2011	National Centre of Veterinary Diagnostics	Centers for Disease Control and Prevention
EPI387936	NP	Vietnam	2011-Dec-06	A/muscovy-duck/Vietnam/LBM66/2011		Other Database Import	Soda,K.; Hotta,K.; Nagai,Y.; Ito,T.; Mimura,W.
EPI401491	NP	Japan	2011-Feb-01	A/chicken/Aichi/2/2011		Other Database Import	Uchida,Y.; Suzuki,Y.; Shirakura,M.; Kawaguchi,A.; Nobusawa,E.; Tanikawa,T.; Hikono,H.; Takemae,N.; Mase,M.; Kanehira,K.; Hayashi,T.; Tagawa,Y.; Tashiro,M.; Saito,T.
EPI401473	NP	Japan	2011-Feb-01	A/chicken/Miyazaki/9/2011		Other Database Import	Uchida,Y.; Suzuki,Y.; Shirakura,M.; Kawaguchi,A.; Nobusawa,E.; Tanikawa,T.; Hikono,H.; Takemae,N.; Mase,M.; Kanehira,K.; Hayashi,T.; Tagawa,Y.; Tashiro,M.; Saito,T.
EPI401497	NP	Japan	2011-Feb-01	A/chicken/Wakayama/1/2011		Other Database Import	Uchida,Y.; Suzuki,Y.; Shirakura,M.; Kawaguchi,A.; Nobusawa,E.; Tanikawa,T.; Hikono,H.; Takemae,N.; Mase,M.; Kanehira,K.; Hayashi,T.; Tagawa,Y.; Tashiro,M.; Saito,T.
EPI448160	NP	Bangladesh	2011-Feb-07	A/crow/Bangladesh/316T/2011	Institute of Epidemiology Disease Control and Research (IEDCR) & Bangladesh National Influenza Centre (NIC)	Centers for Disease Control and Prevention	Gerloff, Nancy; Simpson, Natosha; Poh, Mee;Davis, Todd
EPI618039	NP	Georgia	2011-Feb-11	A/mallard/Republic-of-Georgia/12/2011		Other Database Import	Wentworth,D.E.; Halpin,R.A.; Lin,X.; Simenauer,A.; Akopov,A.; Mohan,M.; Fedorova,N.; Tsitrin,T.; Puri,V.; Stockwell,T.; Amedeo,P.; Bishop,B.; Gupta,N.; Hoover,J.; Katzel,D.; Schobel,S.; Shrivastava,S.; Thovarai,V.; Bao,Y.; Sanders,R.; Zhdanov,S.; Kiryutin,B.; Lipman,D.J.; Tatusova,T.; Fouchier,R.A.M.
EPI470399	NP	China	2011	A/common-teal/Hong-Kong/MPL1075/2011		Other Database Import	Lam,T.T.Y.; Wang,J.; Shen,Y.; Zhou,B.; Duan,L.; Cheung,C.L.; Ma,C.; Lycett,S.J.; Leung,C.Y.H.; Chen,X.; Li,L.; Hong,W.; Chai,Y.; Zhou,L.; Liang,H.; Ou,Z.; Liu,Y.; Farooqui,A.; Kelvin,D.J.; Poon,L.L.M.; Smith,D.K.; Pybus,O.G.; Leung,G.M.; Shu,Y.; Webster,R.G.; Webby,R.J.; Peiris,J.S.M.; Rambaut,A.; Zhu,H.; Guan,Y.
EPI425289	NP	Vietnam	2011	A/duck/Vietnam/NCVD-669/2011	National Centre of Veterinary Diagnostics	Centers for Disease Control and Prevention
EPI448216	NP	Bangladesh	2011-Jul-24	A/duck/Bangladesh/4124T/2011	Institute of Epidemiology Disease Control and Research (IEDCR) & Bangladesh National Influenza Centre (NIC)	Centers for Disease Control and Prevention	Gerloff, Nancy; Simpson, Natosha; Poh, Mee;Davis, Todd
EPI340433	NP	China	2011-Jun-01	A/duck/Zhejiang/0611-15/2011		Other Database Import	Wu,H.; Wu,N.
EPI425513	NP	Vietnam	2011-Jun-15	A/chicken/Vietnam/NCVD-780/2011	National Centre of Veterinary Diagnostics	Centers for Disease Control and Prevention
EPI401555	NP	Japan	2011-Mar-01	A/chicken/Chiba/2/2011		Other Database Import	Uchida,Y.; Suzuki,Y.; Shirakura,M.; Kawaguchi,A.; Nobusawa,E.; Tanikawa,T.; Hikono,H.; Takemae,N.; Mase,M.; Kanehira,K.; Hayashi,T.; Tagawa,Y.; Tashiro,M.; Saito,T.
EPI351701	NP	China	2011-Mar-01	A/chicken/Zhejiang/329/2011		Other Database Import	Wu,H.; Wu,N.
EPI448096	NP	Bangladesh	2011-Mar-20	A/duck/Bangladesh/1849/2011	Institute of Epidemiology Disease Control and Research (IEDCR) & Bangladesh National Influenza Centre (NIC)	Centers for Disease Control and Prevention	Gerloff, Nancy; Simpson, Natosha; Poh, Mee;Davis, Todd
EPI466307	NP	China	2011-May-21	A/chicken/Jiangsu/ZJDT/2011	Yangzhou University	Chinese Academy of Sciences	Daxin, P
EPI383271	NP	China	2011-Nov-29	A/chicken/Guangdong/C273/2011		Other Database Import	Jiao,P.; Yuan,R.; Wei,L.; Jia,B.; Cao,L.; Song,Y.; Gong,L.; Xu,C.; Ren,T.; Liao,M.
EPI574302	NP	Vietnam	2011-Oct-12	A/muscovy-duck/Vietnam/LBM21/2011		Other Database Import	Soda,K.; Hotta,K.; Trang,H.U.; Le,Q.M.; Yamashiro,T.; Ito,T.; Trang,U.H.
EPI470511	NP	China	2011-Sep-01	A/chicken/Hong-Kong/YU158/2011		Other Database Import	Lam,T.T.Y.; Wang,J.; Shen,Y.; Zhou,B.; Duan,L.; Cheung,C.L.; Ma,C.; Lycett,S.J.; Leung,C.Y.H.; Chen,X.; Li,L.; Hong,W.; Chai,Y.; Zhou,L.; Liang,H.; Ou,Z.; Liu,Y.; Farooqui,A.; Kelvin,D.J.; Poon,L.L.M.; Smith,D.K.; Pybus,O.G.; Leung,G.M.; Shu,Y.; Webster,R.G.; Webby,R.J.; Peiris,J.S.M.; Rambaut,A.; Zhu,H.; Guan,Y.
EPI703618	NP	China	2012-Dec-04	A/goose/Eastern-China/L1204/2012		Other Database Import	Sun,H.; Sun,Y.; Pu,J.; Liu,L.; Li,C.; Xu,G.; Qin,M.; Zhang,Y.; Zhao,H.; Wei,K.; Liu,J.
EPI540496	NP	Bangladesh	2012-Dec-15	A/poultry/Bangladesh/91354/2012	Institute of Epidemiology Disease Control and Research (IEDCR) & Bangladesh National Influenza Centre (NIC)	Centers for Disease Control and Prevention	Gerloff, Nancy; Simpson, Natosha; Davis, C. Todd
EPI510861	NP	Taiwan	2012-Dec-25	A/chicken/Taiwan/2437/2012		Other Database Import	Lee,C.C.; Zhu,H.; Huang,P.Y.; Peng,L.; Chang,Y.C.; Yip,C.H.; Li,Y.T.; Cheung,C.L.; Compans,R.; Yang,C.; Smith,D.K.; Lam,T.T.; King,C.C.; Guan,Y.; Lam,T.T.Y.
EPI812392	NP	Bhutan	2012-Feb-14	A/chicken/Bhutan/259/2012		Other Database Import	Franks,J.S.; Tenzin,S.; Tshering,D.; Rai,P.; Lhamo,K.; Dahal,N.; Dukpa,K.
EPI425385	NP	Vietnam	2012-Feb-16	A/duck/Vietnam/NCVD-1253/2012	National Centre of Veterinary Diagnostics	Centers for Disease Control and Prevention
EPI470534	NP	China	2012	A/chicken/Hong-Kong/YU150W/2012		Other Database Import	Lam,T.T.Y.; Wang,J.; Shen,Y.; Zhou,B.; Duan,L.; Cheung,C.L.; Ma,C.; Lycett,S.J.; Leung,C.Y.H.; Chen,X.; Li,L.; Hong,W.; Chai,Y.; Zhou,L.; Liang,H.; Ou,Z.; Liu,Y.; Farooqui,A.; Kelvin,D.J.; Poon,L.L.M.; Smith,D.K.; Pybus,O.G.; Leung,G.M.; Shu,Y.; Webster,R.G.; Webby,R.J.; Peiris,J.S.M.; Rambaut,A.; Zhu,H.; Guan,Y.
EPI470536	NP	China	2012	A/chicken/Hong-Kong/YU262W/2012		Other Database Import	Lam,T.T.Y.; Wang,J.; Shen,Y.; Zhou,B.; Duan,L.; Cheung,C.L.; Ma,C.; Lycett,S.J.; Leung,C.Y.H.; Chen,X.; Li,L.; Hong,W.; Chai,Y.; Zhou,L.; Liang,H.; Ou,Z.; Liu,Y.; Farooqui,A.; Kelvin,D.J.; Poon,L.L.M.; Smith,D.K.; Pybus,O.G.; Leung,G.M.; Shu,Y.; Webster,R.G.; Webby,R.J.; Peiris,J.S.M.; Rambaut,A.; Zhu,H.; Guan,Y.
EPI585429	NP	India	2012-Jan-04	A/chicken/India/01CA06/2012		Other Database Import	Nagarajan,S.; Syed,Z.; Tosh,C.; Murugkar,H.V.; Kumar,M.; Kulkarni,D.D.
EPI572830	NP	China	2012-Jul-03	A/chicken/Shanxi/0703/2012		Other Database Import	Pu,J.; Wang,S.; Yin,Y.; Zhang,G.; Carter,R.A.; Wang,J.; Xu,G.; Sun,H.; Wang,M.; Wen,C.; Wei,Y.; Wang,D.; Zhu,B.; Lemmon,G.; Jiao,Y.; Duan,S.; Wang,Q.; Du,Q.; Sun,M.; Bao,J.; Sun,Y.; Zhao,J.; Zhang,H.; Wu,G.; Liu,J.; Webster,R.G.; Lv,N.
EPI461023	NP	Vietnam	2012-Jul-28	A/duck/Vietnam/QB1207/2012		Other Database Import	Bui,V.N.; Dao,T.D.; Nguyen,L.T.; Nguyen,T.N.T.; Bui,A.N.; Trinh,D.Q.; Inui,K.; Runstadler,J.; Ogawa,H.; Nguyen,K.V.; Imai,K.; Nguyen,T.T.H.
EPI692545	NP	China	2012-Jun-05	A/duck/Jiangxi/S21055/2012		Other Database Import	Liang,L.; Deng,G.; Shi,J.; Wang,S.; Zhang,Q.; Kong,H.; Gu,C.; Guan,Y.; Suzuki,Y.; Li,Y.; Jiang,Y.; Tian,G.; Liu,L.; Li,C.; Chen,H.
EPI466379	NP	China	2012-Mar-24	A/chicken/Jiangsu/CZYWP/2012	Yangzhou University	Chinese Academy of Sciences	Daxin, P
EPI440911	NP	China	2012-Nov-17	A/chicken/Shaanxi/11/2012		Other Database Import	Ren,J.; Wang,J.
EPI540488	NP	Bangladesh	2012-Nov-29	A/avian/Bangladesh/91286/2012	Institute of Epidemiology Disease Control and Research (IEDCR) & Bangladesh National Influenza Centre (NIC)	Centers for Disease Control and Prevention	Gerloff, Nancy; Simpson, Natosha; Davis, C. Todd
EPI533883	NP	China	2012-Sep-07	A/duck/Guangxi/125D17/2012		Other Database Import	Wu,A.Q.; Xie,Z.X.; Xie,L.J.; Xie,Q.Z.; Luo,S.S.; Liu,J.B.; Deng,X.W.; Fan,Q.; Pang,Y.S.
EPI532266	NP	China	2013-Apr-01	A/chicken/Zhejiang/C481/2013		Other Database Import	Wu,H.; Wu,N.; Guo,C.; Li,L.
EPI649264	NP	China	2013-Apr-01	A/duck/Zhejiang/413/2013		Other Database Import	Wu,H.; Peng,X.; Cheng,L.; Lu,X.; Jin,C.; Xie,T.; Yao,H.; Wu,N.
EPI680842	NP	China	2013-Apr-08	A/pigeon/Zhejiang/P5/2013		Other Database Import	Wu,H.; Peng,X.; Cheng,L.; Lu,X.; Jin,C.; Xie,T.; Yao,H.; Wu,N.
EPI589830	NP	Vietnam	2013-Apr-13	A/muscovy-duck/Quang-Ninh/7c121/2013		Other Database Import	Soda,K.; Hotta,K.; Trang,H.U.; Le,Q.M.; Yamashiro,T.; Ito,T.
EPI457846	NP	China	2013-Apr-16	A/chicken/Jiangsu/SC537/2013	Harbin Veterinary Research Institute (CAAS)	Harbin Veterinary Research Institute (CAAS)	Zhang, Q.; Shi, J.; Deng, G.; Guo, J.; Zeng, X.; He, X.; Kong, H.; Gu, C.; Li, X.; Liu, J.; Wang, G.; Chen, Y.; Liu, L.; Liang, L.; Li, Y.; Fan, J.; Wang, J.; Li, W.; Guan, L.; Li, Q.; Yang, H.; Chen, P.; Jiang, L.; Guan, Y.; Xin, X.; Jiang, Y.; Tian, G.; Wang, X.; Qiao, C.; Li, C.; Bu, Z.; Chen, H.
EPI544893	NP	China	2013-Apr-25	A/duck/Shandong/Q1/2013		Other Database Import	Li,Q.
EPI544795	NP	China	2013-Apr-26	A/duck/Shanghai/SH3/2013		Other Database Import	Yang,D.; Liu,J.; Ju,H.; Ge,F.; Wang,J.; Li,X.; Liu,P.; Zhou,J.
EPI775058	NP	Vietnam	2013-Aug-13	A/chicken/DongNai/0182/2013		Other Database Import	Cao,B.V.; Le Ha,T.D.; Mai,V.N.; Dang Trinh,M.A.; Le Phan,K.N.; Vo Tran,N.T.; Hoang,T.
EPI591587	NP	China	2013-Aug-25	A/duck/Jiangxi/20189/2013		Other Database Import	Lam,T.Y.; Zhou,B.; Wang,J.; Chai,Y.; Shen,Y.; Chen,X.; Ma,C.; Hong,W.; Chen,Y.; Zhang,Y.; Duan,L.; Chen,P.; Jiang,J.; Li,L.; Poon,L.M.; Webby,R.J.; Smith,D.K.; Leung,G.M.; Peiris,J.M.; Holmes,E.C.; Guan,Y.; Zhu,H.
EPI599750	NP	China	2013-Dec-08	A/chicken/Jiangxi/31856/2013		Other Database Import	Ma,C.; Lam,T.T.Y.; Chai,Y.; Wang,J.; Fan,X.; Hong,W.; Zhang,Y.; Li,L.; Liu,Y.; Smith,D.K.; Webby,R.J.; Peiris,J.S.M.; Zhu,H.; Guan,Y.
EPI583425	NP	China	2013-Dec-11	A/chicken/Shenzhen/1098/2013		Other Database Import	Lam,T.Y.; Zhou,B.; Wang,J.; Chai,Y.; Shen,Y.; Chen,X.; Ma,C.; Hong,W.; Chen,Y.; Zhang,Y.; Duan,L.; Chen,P.; Jiang,J.; Li,L.; Poon,L.M.; Webby,R.J.; Smith,D.K.; Leung,G.M.; Peiris,J.M.; Holmes,E.C.; Guan,Y.; Zhu,H.
EPI583503	NP	China	2013-Dec-12	A/chicken/Shenzhen/1799/2013		Other Database Import	Lam,T.Y.; Zhou,B.; Wang,J.; Chai,Y.; Shen,Y.; Chen,X.; Ma,C.; Hong,W.; Chen,Y.; Zhang,Y.; Duan,L.; Chen,P.; Jiang,J.; Li,L.; Poon,L.M.; Webby,R.J.; Smith,D.K.; Leung,G.M.; Peiris,J.M.; Holmes,E.C.; Guan,Y.; Zhu,H.
EPI602448	NP	China	2013-Dec-15	A/duck/Jiangxi/33665/2013		Other Database Import	Ma,C.; Lam,T.T.Y.; Chai,Y.; Wang,J.; Fan,X.; Hong,W.; Zhang,Y.; Li,L.; Liu,Y.; Smith,D.K.; Webby,R.J.; Peiris,J.S.M.; Zhu,H.; Guan,Y.
EPI602382	NP	China	2013-Dec-15	A/duck/Jiangxi/33713/2013		Other Database Import	Ma,C.; Lam,T.T.Y.; Chai,Y.; Wang,J.; Fan,X.; Hong,W.; Zhang,Y.; Li,L.; Liu,Y.; Smith,D.K.; Webby,R.J.; Peiris,J.S.M.; Zhu,H.; Guan,Y.
EPI599880	NP	China	2013-Dec-15	A/duck/Jiangxi/33779/2013		Other Database Import	Ma,C.; Lam,T.T.Y.; Chai,Y.; Wang,J.; Fan,X.; Hong,W.; Zhang,Y.; Li,L.; Liu,Y.; Smith,D.K.; Webby,R.J.; Peiris,J.S.M.; Zhu,H.; Guan,Y.
EPI600173	NP	China	2013-Dec-15	A/migratory-duck/Jiangxi/33195/2013		Other Database Import	Ma,C.; Lam,T.T.Y.; Chai,Y.; Wang,J.; Fan,X.; Hong,W.; Zhang,Y.; Li,L.; Liu,Y.; Smith,D.K.; Webby,R.J.; Peiris,J.S.M.; Zhu,H.; Guan,Y.
EPI583587	NP	China	2013-Dec-18	A/chicken/Dongguan/2754/2013		Other Database Import	Lam,T.Y.; Zhou,B.; Wang,J.; Chai,Y.; Shen,Y.; Chen,X.; Ma,C.; Hong,W.; Chen,Y.; Zhang,Y.; Duan,L.; Chen,P.; Jiang,J.; Li,L.; Poon,L.M.; Webby,R.J.; Smith,D.K.; Leung,G.M.; Peiris,J.M.; Holmes,E.C.; Guan,Y.; Zhu,H.
EPI581687	NP	China	2013-Dec-18	A/silkie-chicken/Dongguan/3284/2013		Other Database Import	Lam,T.Y.; Zhou,B.; Wang,J.; Chai,Y.; Shen,Y.; Chen,X.; Ma,C.; Hong,W.; Chen,Y.; Zhang,Y.; Duan,L.; Chen,P.; Jiang,J.; Li,L.; Poon,L.M.; Webby,R.J.; Smith,D.K.; Leung,G.M.; Peiris,J.M.; Holmes,E.C.; Guan,Y.; Zhu,H.
EPI583657	NP	China	2013-Dec-19	A/chicken/Dongguan/3409/2013		Other Database Import	Lam,T.Y.; Zhou,B.; Wang,J.; Chai,Y.; Shen,Y.; Chen,X.; Ma,C.; Hong,W.; Chen,Y.; Zhang,Y.; Duan,L.; Chen,P.; Jiang,J.; Li,L.; Poon,L.M.; Webby,R.J.; Smith,D.K.; Leung,G.M.; Peiris,J.M.; Holmes,E.C.; Guan,Y.; Zhu,H.
EPI581894	NP	China	2013-Dec-19	A/chicken/Dongguan/3935/2013		Other Database Import	Lam,T.Y.; Zhou,B.; Wang,J.; Chai,Y.; Shen,Y.; Chen,X.; Ma,C.; Hong,W.; Chen,Y.; Zhang,Y.; Duan,L.; Chen,P.; Jiang,J.; Li,L.; Poon,L.M.; Webby,R.J.; Smith,D.K.; Leung,G.M.; Peiris,J.M.; Holmes,E.C.; Guan,Y.; Zhu,H.
EPI601856	NP	China	2013-Dec-29	A/chicken/Jiangxi/36223/2013		Other Database Import	Ma,C.; Lam,T.T.Y.; Chai,Y.; Wang,J.; Fan,X.; Hong,W.; Zhang,Y.; Li,L.; Liu,Y.; Smith,D.K.; Webby,R.J.; Peiris,J.S.M.; Zhu,H.; Guan,Y.
EPI838081	NP	China	2013	A/chicken/Sichuan/SIC8/2013		Other Database Import	Liu,Y.; Lai,H.; Li,L.; Chen,R.
EPI470559	NP	China	2013	A/chicken/Wenzhou/640/2013		Other Database Import	Lam,T.T.Y.; Wang,J.; Shen,Y.; Zhou,B.; Duan,L.; Cheung,C.L.; Ma,C.; Lycett,S.J.; Leung,C.Y.H.; Chen,X.; Li,L.; Hong,W.; Chai,Y.; Zhou,L.; Liang,H.; Ou,Z.; Liu,Y.; Farooqui,A.; Kelvin,D.J.; Poon,L.L.M.; Smith,D.K.; Pybus,O.G.; Leung,G.M.; Shu,Y.; Webster,R.G.; Webby,R.J.; Peiris,J.S.M.; Rambaut,A.; Zhu,H.; Guan,Y.
EPI898654	NP	Vietnam	2013-Jan-09	A/chicken/Vietnam/NCVD-2693/2013		Other Database Import	Davis,T.; Jang,Y.
EPI510798	NP	Taiwan	2013-Jan-10	A/duck/Taiwan/4376/2013		Other Database Import	Lee,C.C.; Zhu,H.; Huang,P.Y.; Peng,L.; Chang,Y.C.; Yip,C.H.; Li,Y.T.; Cheung,C.L.; Compans,R.; Yang,C.; Smith,D.K.; Lam,T.T.; King,C.C.; Guan,Y.; Lam,T.T.Y.
EPI466451	NP	China	2013-Jan-23	A/chicken/Jiangsu/ZJ4/2013	Yangzhou University	Chinese Academy of Sciences	Daxin, P
EPI1061148	NP	China	2013-Jul-07	A/duck/Zhejiang/7731/2013		Other Database Import	Wu,H.; Lu,R.; Peng,X.; Liu,F.; Cheng,L.; Wu,N.
EPI598947	NP	China	2013-Jul-10	A/duck/Wuxi/2/2013		Other Database Import	Ma,M.J.; Yang,X.X.; Qian,Y.H.; Zhao,S.Y.; Hua,S.; Wang,T.C.; Chen,S.H.; Ma,G.Y.; Sang,X.Y.; Liu,L.N.; Wu,A.P.; Jiang,T.J.; Gao,Y.W.; Gray,G.C.; Zhao,T.; Ling,X.; Wang,J.L.; Lu,B.; Qian,J.; Cao,W.C.; Ma,M. J.; Yang,X. X.; Cao,W. C.
EPI1061151	NP	China	2013-Jul-17	A/duck/Zhejiang/71731/2013		Other Database Import	Wu,H.; Lu,R.; Peng,X.; Liu,F.; Cheng,L.; Wu,N.
EPI1061152	NP	China	2013-Jul-17	A/duck/Zhejiang/71737/2013		Other Database Import	Wu,H.; Lu,R.; Peng,X.; Liu,F.; Cheng,L.; Wu,N.
EPI600055	NP	China	2013-Jul-21	A/chicken/Jiangxi/17403/2013		Other Database Import	Ma,C.; Lam,T.T.Y.; Chai,Y.; Wang,J.; Fan,X.; Hong,W.; Zhang,Y.; Li,L.; Liu,Y.; Smith,D.K.; Webby,R.J.; Peiris,J.S.M.; Zhu,H.; Guan,Y.
EPI471174	NP	Vietnam	2013-Jun-05	A/muscovy-duck/Vietnam/LBM436/2013		Other Database Import	Nakamura,Y.; Soda,K.; Hotta,K.; Lee,M.Q.; Ito,T.
EPI568754	NP	China	2013-Mar-07	A/chicken/Shandong/qd0307/2013		Other Database Import	Pu,J.; Wang,S.; Yin,Y.; Zhang,G.; Carter,R.A.; Wang,J.; Xu,G.; Sun,H.; Wang,M.; Wen,C.; Wei,Y.; Wang,D.; Zhu,B.; Lemmon,G.; Jiao,Y.; Duan,S.; Wang,Q.; Du,Q.; Sun,M.; Bao,J.; Sun,Y.; Zhao,J.; Zhang,H.; Wu,G.; Liu,J.; Webster,R.G.; Lv,N.
EPI530987	NP	China	2013-Nov-14	A/duck/Zhejiang/W24/2013		Other Database Import	Wu,H.; Peng,X.; Xu,L.; Jin,C.; Cheng,L.; Lu,X.; Xie,T.; Yao,H.; Wu,N.
EPI680866	NP	China	2013-Oct-16	A/chicken/Zhejiang/C46/2013		Other Database Import	Wu,H.; Peng,X.; Cheng,L.; Lu,X.; Jin,C.; Xie,T.; Yao,H.; Wu,N.
EPI534847	NP	China	2013-Oct-16	A/duck/Zhejiang/D16/2013		Other Database Import	Wu,H.; Wu,N.; Peng,X.; Jin,C.; Lu,X.; Cheng,L.; Yao,H.; Li,L.
EPI596651	NP	China	2013-Oct-20	A/chicken/Shaoxing/2414/2013		Other Database Import	Lam,T.Y.; Zhou,B.; Wang,J.; Chai,Y.; Shen,Y.; Chen,X.; Ma,C.; Hong,W.; Chen,Y.; Zhang,Y.; Duan,L.; Chen,P.; Jiang,J.; Li,L.; Poon,L.M.; Webby,R.J.; Smith,D.K.; Leung,G.M.; Peiris,J.M.; Holmes,E.C.; Guan,Y.; Zhu,H.
EPI596713	NP	China	2013-Oct-23	A/chicken/Wenzhou/3330/2013		Other Database Import	Lam,T.Y.; Zhou,B.; Wang,J.; Chai,Y.; Shen,Y.; Chen,X.; Ma,C.; Hong,W.; Chen,Y.; Zhang,Y.; Duan,L.; Chen,P.; Jiang,J.; Li,L.; Poon,L.M.; Webby,R.J.; Smith,D.K.; Leung,G.M.; Peiris,J.M.; Holmes,E.C.; Guan,Y.; Zhu,H.
EPI582355	NP	China	2013-Oct-24	A/chicken/Huzhou/3791/2013		Other Database Import	Lam,T.Y.; Zhou,B.; Wang,J.; Chai,Y.; Shen,Y.; Chen,X.; Ma,C.; Hong,W.; Chen,Y.; Zhang,Y.; Duan,L.; Chen,P.; Jiang,J.; Li,L.; Poon,L.M.; Webby,R.J.; Smith,D.K.; Leung,G.M.; Peiris,J.M.; Holmes,E.C.; Guan,Y.; Zhu,H.
EPI582984	NP	China	2013-Oct-24	A/chicken/Huzhou/4076/2013		Other Database Import	Lam,T.Y.; Zhou,B.; Wang,J.; Chai,Y.; Shen,Y.; Chen,X.; Ma,C.; Hong,W.; Chen,Y.; Zhang,Y.; Duan,L.; Chen,P.; Jiang,J.; Li,L.; Poon,L.M.; Webby,R.J.; Smith,D.K.; Leung,G.M.; Peiris,J.M.; Holmes,E.C.; Guan,Y.; Zhu,H.
EPI592018	NP	China	2013-Oct-29	A/chicken/Shaoxing/5493/2013		Other Database Import	Lam,T.Y.; Zhou,B.; Wang,J.; Chai,Y.; Shen,Y.; Chen,X.; Ma,C.; Hong,W.; Chen,Y.; Zhang,Y.; Duan,L.; Chen,P.; Jiang,J.; Li,L.; Poon,L.M.; Webby,R.J.; Smith,D.K.; Leung,G.M.; Peiris,J.M.; Holmes,E.C.; Guan,Y.; Zhu,H.
EPI592492	NP	China	2014-Apr-06	A/chicken/Jiangxi/13515/2014		Other Database Import	Lam,T.Y.; Zhou,B.; Wang,J.; Chai,Y.; Shen,Y.; Chen,X.; Ma,C.; Hong,W.; Chen,Y.; Zhang,Y.; Duan,L.; Chen,P.; Jiang,J.; Li,L.; Poon,L.M.; Webby,R.J.; Smith,D.K.; Leung,G.M.; Peiris,J.M.; Holmes,E.C.; Guan,Y.; Zhu,H.
EPI592578	NP	China	2014-Apr-06	A/chicken/Jiangxi/13543/2014		Other Database Import	Lam,T.Y.; Zhou,B.; Wang,J.; Chai,Y.; Shen,Y.; Chen,X.; Ma,C.; Hong,W.; Chen,Y.; Zhang,Y.; Duan,L.; Chen,P.; Jiang,J.; Li,L.; Poon,L.M.; Webby,R.J.; Smith,D.K.; Leung,G.M.; Peiris,J.M.; Holmes,E.C.; Guan,Y.; Zhu,H.
EPI1036027	NP	China	2014-Apr-14	A/pigeon/Guangxi/164/2014		Other Database Import	Li,M.; Xie,Z.X.; Xie,L.J.; Deng,X.W.; Xie,Q.Z.; Liu,J.B.; Fan,Q.; Pang,Y.S.; Luo,S.S.
EPI593231	NP	China	2014-Apr-16	A/chicken/Shantou/2556/2014		Other Database Import	Lam,T.Y.; Zhou,B.; Wang,J.; Chai,Y.; Shen,Y.; Chen,X.; Ma,C.; Hong,W.; Chen,Y.; Zhang,Y.; Duan,L.; Chen,P.; Jiang,J.; Li,L.; Poon,L.M.; Webby,R.J.; Smith,D.K.; Leung,G.M.; Peiris,J.M.; Holmes,E.C.; Guan,Y.; Zhu,H.
EPI593238	NP	China	2014-Apr-16	A/chicken/Shantou/2562/2014		Other Database Import	Lam,T.Y.; Zhou,B.; Wang,J.; Chai,Y.; Shen,Y.; Chen,X.; Ma,C.; Hong,W.; Chen,Y.; Zhang,Y.; Duan,L.; Chen,P.; Jiang,J.; Li,L.; Poon,L.M.; Webby,R.J.; Smith,D.K.; Leung,G.M.; Peiris,J.M.; Holmes,E.C.; Guan,Y.; Zhu,H.
EPI592660	NP	China	2014-Apr-20	A/chicken/Jiangxi/14479/2014		Other Database Import	Lam,T.Y.; Zhou,B.; Wang,J.; Chai,Y.; Shen,Y.; Chen,X.; Ma,C.; Hong,W.; Chen,Y.; Zhang,Y.; Duan,L.; Chen,P.; Jiang,J.; Li,L.; Poon,L.M.; Webby,R.J.; Smith,D.K.; Leung,G.M.; Peiris,J.M.; Holmes,E.C.; Guan,Y.; Zhu,H.
EPI683049	NP	China	2014-Dec-01	A/turtledove/Wuhan/WHBJ12/2014		Other Database Import	Chen,L. J.; Lin,X. D.; Guo,W. P.; Tian,J. H.; Zhang,Y. Z.
EPI969336	NP	Korea,-Republic-of	2014-Dec-02	A/wild-bird/Korea/SK14/2014		Other Database Import	Koo,B. S.; Yoon,S. W.
EPI845905	NP	Japan	2014-Dec-19	A/mandarin-duck/Gifu/2112D001/2014		Other Database Import	Usui,T.; Soda,K.; Tomioka,Y.; Okamura,M.; Ishihara,T.; Yano,M.; Yabuta,T.; Takakuwa,H.; Otsuki,K.; Ito,H.; Ito,T.; Yamaguchi,T.
EPI895331	NP	China	2014-Dec-22	A/Anser-fabalis/China/Anhui/L180/2014		Other Database Import	Ye,G.; Liang,C.H.; Ping,H.Y.; Hua,D.G.; Cheng,Y.Q.
EPI895347	NP	China	2014-Dec-22	A/Anser-fabalis/China/Anhui/L256/2014		Other Database Import	Ye,G.; Liang,C.H.; Ping,H.Y.; Hua,D.G.; Cheng,Y.Q.
EPI561675	NP	Korea,-Republic-of	2014-Feb-01	A/bean-goose/Korea/H328/2014		Other Database Import	Jeong,J.; Kang,H.M.; Lee,E.K.; Song,B.M.; Kwon,Y.K.; Kim,H.R.; Choi,K.S.; Kim,J.Y.; Lee,H.J.; Moon,O.K.; Jeong,W.; Choi,J.; Baek,J.H.; Joo,Y.S.; Park,Y.H.; Lee,H.S.; Lee,Y.J.; Lee,Y. J.; Kang,H. M.; Lee,E. K.; Song,B. M.; Lee,K. J.; Hong,M. S.
EPI703622	NP	China	2014-Feb-15	A/duck/Eastern-China/S0215/2014		Other Database Import	Sun,H.; Sun,Y.; Pu,J.; Liu,L.; Li,C.; Xu,G.; Qin,M.; Zhang,Y.; Zhao,H.; Wei,K.; Liu,J.
EPI594277	NP	China	2014-Feb-18	A/chicken/Jiangxi/10953/2014		Other Database Import	Lam,T.Y.; Zhou,B.; Wang,J.; Chai,Y.; Shen,Y.; Chen,X.; Ma,C.; Hong,W.; Chen,Y.; Zhang,Y.; Duan,L.; Chen,P.; Jiang,J.; Li,L.; Poon,L.M.; Webby,R.J.; Smith,D.K.; Leung,G.M.; Peiris,J.M.; Holmes,E.C.; Guan,Y.; Zhu,H.
EPI594326	NP	China	2014-Feb-18	A/chicken/Jiangxi/10961/2014		Other Database Import	Lam,T.Y.; Zhou,B.; Wang,J.; Chai,Y.; Shen,Y.; Chen,X.; Ma,C.; Hong,W.; Chen,Y.; Zhang,Y.; Duan,L.; Chen,P.; Jiang,J.; Li,L.; Poon,L.M.; Webby,R.J.; Smith,D.K.; Leung,G.M.; Peiris,J.M.; Holmes,E.C.; Guan,Y.; Zhu,H.
EPI597273	NP	China	2014-Feb-20	A/chicken/Dongguan/749/2014		Other Database Import	Lam,T.Y.; Zhou,B.; Wang,J.; Chai,Y.; Shen,Y.; Chen,X.; Ma,C.; Hong,W.; Chen,Y.; Zhang,Y.; Duan,L.; Chen,P.; Jiang,J.; Li,L.; Poon,L.M.; Webby,R.J.; Smith,D.K.; Leung,G.M.; Peiris,J.M.; Holmes,E.C.; Guan,Y.; Zhu,H.
EPI597325	NP	China	2014-Feb-20	A/chicken/Dongguan/836/2014		Other Database Import	Lam,T.Y.; Zhou,B.; Wang,J.; Chai,Y.; Shen,Y.; Chen,X.; Ma,C.; Hong,W.; Chen,Y.; Zhang,Y.; Duan,L.; Chen,P.; Jiang,J.; Li,L.; Poon,L.M.; Webby,R.J.; Smith,D.K.; Leung,G.M.; Peiris,J.M.; Holmes,E.C.; Guan,Y.; Zhu,H.
EPI596855	NP	China	2014-Feb-20	A/chicken/Dongguan/856/2014		Other Database Import	Lam,T.Y.; Zhou,B.; Wang,J.; Chai,Y.; Shen,Y.; Chen,X.; Ma,C.; Hong,W.; Chen,Y.; Zhang,Y.; Duan,L.; Chen,P.; Jiang,J.; Li,L.; Poon,L.M.; Webby,R.J.; Smith,D.K.; Leung,G.M.; Peiris,J.M.; Holmes,E.C.; Guan,Y.; Zhu,H.
EPI528347	NP	China	2014-Feb-20	A/Chicken/Jilin/13199/2014	WHO Chinese National Influenza Center	WHO Chinese National Influenza Center	Wang,Dayan;Gao,Rongbao;Yang,Lei;Zhou,Shumei;Li,Xiyan;Zhou,Jianfang;Zhu,Wenfei;Guo,Junfeng;Li,Xiaodan;Dong,Jie;Huang,Weijuan;Zhang,Ye;Dong,Libo;Zhao,Xiang;Lu,Jian;Lan,Yu;Shu,Yuelong
EPI898449	NP	Vietnam	2014-Feb-20	A/chicken/Vietnam/NCVD14-A461/2014		Other Database Import	Davis,T.; Jang,Y.
EPI597575	NP	China	2014-Feb-21	A/chicken/Dongguan/1415/2014		Other Database Import	Lam,T.Y.; Zhou,B.; Wang,J.; Chai,Y.; Shen,Y.; Chen,X.; Ma,C.; Hong,W.; Chen,Y.; Zhang,Y.; Duan,L.; Chen,P.; Jiang,J.; Li,L.; Poon,L.M.; Webby,R.J.; Smith,D.K.; Leung,G.M.; Peiris,J.M.; Holmes,E.C.; Guan,Y.; Zhu,H.
EPI597097	NP	China	2014-Feb-21	A/chicken/Dongguan/1523/2014		Other Database Import	Lam,T.Y.; Zhou,B.; Wang,J.; Chai,Y.; Shen,Y.; Chen,X.; Ma,C.; Hong,W.; Chen,Y.; Zhang,Y.; Duan,L.; Chen,P.; Jiang,J.; Li,L.; Poon,L.M.; Webby,R.J.; Smith,D.K.; Leung,G.M.; Peiris,J.M.; Holmes,E.C.; Guan,Y.; Zhu,H.
EPI837637	NP	China	2014-Feb-26	A/migratory-waterfowl/Hubei/Chenhu1347/2014		Other Database Import	Bi,Y.; Liu,H.; Xiong,C.; Di,Liu.; Shi,W.; Li,M.; Liu,S.; Chen,J.; Chen,G.; Li,Y.; Yang,G.; Lei,Y.; Xiong,Y.; Lei,F.; Wang,H.; Chen,Q.; Gao,G.F.
EPI601295	NP	China	2014-Jan-05	A/chicken/Jiangxi/1244/2014		Other Database Import	Ma,C.; Lam,T.T.Y.; Chai,Y.; Wang,J.; Fan,X.; Hong,W.; Zhang,Y.; Li,L.; Liu,Y.; Smith,D.K.; Webby,R.J.; Peiris,J.S.M.; Zhu,H.; Guan,Y.
EPI601886	NP	China	2014-Jan-05	A/chicken/Jiangxi/1271/2014		Other Database Import	Ma,C.; Lam,T.T.Y.; Chai,Y.; Wang,J.; Fan,X.; Hong,W.; Zhang,Y.; Li,L.; Liu,Y.; Smith,D.K.; Webby,R.J.; Peiris,J.S.M.; Zhu,H.; Guan,Y.
EPI652945	NP	China	2014-Jan-10	A/chicken/Qingdao/014/2014		Other Database Import	Wang,K.; Zhuang,Q.; Chen,J.
EPI601275	NP	China	2014-Jan-12	A/chicken/Jiangxi/3119/2014		Other Database Import	Ma,C.; Lam,T.T.Y.; Chai,Y.; Wang,J.; Fan,X.; Hong,W.; Zhang,Y.; Li,L.; Liu,Y.; Smith,D.K.; Webby,R.J.; Peiris,J.S.M.; Zhu,H.; Guan,Y.
EPI602464	NP	China	2014-Jan-12	A/chicken/Jiangxi/3152/2014		Other Database Import	Ma,C.; Lam,T.T.Y.; Chai,Y.; Wang,J.; Fan,X.; Hong,W.; Zhang,Y.; Li,L.; Liu,Y.; Smith,D.K.; Webby,R.J.; Peiris,J.S.M.; Zhu,H.; Guan,Y.
EPI509705	NP	Korea,-Republic-of	2014-Jan-17	A/broiler-duck/Korea/Buan2/2014		Other Database Import	Lee,Y. J.; Kang,H. M.; Lee,E. K.; Song,B. M.; Jeong,J.; Kwon,Y. K.; Kim,H. R.; Lee,K. J.; Hong,M. S.; Jang,I.; Choi,K. S.; Kim,J. Y.; Lee,H. J.; Kang,M. S.; Jeong,O. M.; Baek,J. H.; Joo,Y. S.; Park,Y.Ho.; Lee,H. S.; Park,Y.H.
EPI672775	NP	China	2014-Jan-20	A/wildfowl/China/472/2014	Institute of Poultry Science, Shandong, Academy of Agricultural Science	South China Agricultural University	Wang, Youling
EPI561543	NP	Korea,-Republic-of	2014-Jan-22	A/Baikal-teal/Korea/H68/2014		Other Database Import	Jeong,J.; Kang,H.M.; Lee,E.K.; Song,B.M.; Kwon,Y.K.; Kim,H.R.; Choi,K.S.; Kim,J.Y.; Lee,H.J.; Moon,O.K.; Jeong,W.; Choi,J.; Baek,J.H.; Joo,Y.S.; Park,Y.H.; Lee,H.S.; Lee,Y.J.; Lee,Y. J.; Kang,H. M.; Lee,E. K.; Song,B. M.; Lee,K. J.; Hong,M. S.
EPI561592	NP	Korea,-Republic-of	2014-Jan-25	A/breeder-duck/Korea/H128/2014		Other Database Import	Jeong,J.; Kang,H.M.; Lee,E.K.; Song,B.M.; Kwon,Y.K.; Kim,H.R.; Choi,K.S.; Kim,J.Y.; Lee,H.J.; Moon,O.K.; Jeong,W.; Choi,J.; Baek,J.H.; Joo,Y.S.; Park,Y.H.; Lee,H.S.; Lee,Y.J.; Lee,Y. J.; Kang,H. M.; Lee,E. K.; Song,B. M.; Lee,K. J.; Hong,M. S.
EPI561599	NP	Korea,-Republic-of	2014-Jan-25	A/broiler-duck/Korea/H133/2014		Other Database Import	Jeong,J.; Kang,H.M.; Lee,E.K.; Song,B.M.; Kwon,Y.K.; Kim,H.R.; Choi,K.S.; Kim,J.Y.; Lee,H.J.; Moon,O.K.; Jeong,W.; Choi,J.; Baek,J.H.; Joo,Y.S.; Park,Y.H.; Lee,H.S.; Lee,Y.J.; Lee,Y. J.; Kang,H. M.; Lee,E. K.; Song,B. M.; Lee,K. J.; Hong,M. S.
EPI647470	NP	China	2014-Jul-01	A/chicken/Zhejiang/727031/2014		Other Database Import	Wu,H.; Peng,X.; Cheng,L.; Wu,N.
EPI681121	NP	China	2014-Jul-07	A/chicken/Zhejiang/77082/2014		Other Database Import	Wu,H.; Peng,X.; Cheng,L.; Lu,X.; Jin,C.; Xie,T.; Yao,H.; Wu,N.
EPI649249	NP	China	2014-Jul-07	A/duck/Zhejiang/77127/2014		Other Database Import	Wu,H.; Peng,X.; Cheng,L.; Lu,X.; Jin,C.; Xie,T.; Yao,H.; Wu,N.
EPI681310	NP	China	2014-Jul-07	A/goose/Zhejiang/77167/2014		Other Database Import	Wu,H.; Peng,X.; Cheng,L.; Lu,X.; Jin,C.; Xie,T.; Yao,H.; Wu,N.
EPI681114	NP	China	2014-Jul-07	A/pigeon/Zhejiang/77037/2014		Other Database Import	Wu,H.; Peng,X.; Cheng,L.; Lu,X.; Jin,C.; Xie,T.; Yao,H.; Wu,N.
EPI681325	NP	China	2014-Jul-27	A/chicken/Zhejiang/727155/2014		Other Database Import	Wu,H.; Peng,X.; Cheng,L.; Lu,X.; Jin,C.; Xie,T.; Yao,H.; Wu,N.
EPI681315	NP	China	2014-Jul-27	A/goose/Zhejiang/727092/2014		Other Database Import	Wu,H.; Peng,X.; Cheng,L.; Lu,X.; Jin,C.; Xie,T.; Yao,H.; Wu,N.
EPI681115	NP	China	2014-Jul-27	A/pigeon/Zhejiang/727044/2014		Other Database Import	Wu,H.; Peng,X.; Cheng,L.; Lu,X.; Jin,C.; Xie,T.; Yao,H.; Wu,N.
EPI585732	NP	China	2014-Jun-01	A/swan-goose/Jilin/JL01/2014		Other Database Import	Yu,Z.; Wang,T.; Gao,X.; Gao,Y.; Xia,X.
EPI593373	NP	China	2014-Jun-07	A/chicken/Jiangxi/17989/2014		Other Database Import	Lam,T.Y.; Zhou,B.; Wang,J.; Chai,Y.; Shen,Y.; Chen,X.; Ma,C.; Hong,W.; Chen,Y.; Zhang,Y.; Duan,L.; Chen,P.; Jiang,J.; Li,L.; Poon,L.M.; Webby,R.J.; Smith,D.K.; Leung,G.M.; Peiris,J.M.; Holmes,E.C.; Guan,Y.; Zhu,H.
EPI644471	NP	China	2014-Mar-01	A/chicken/Zhejiang/2C66/2014		Other Database Import	Wu,H.; Lu,R.; Wu,X.; Peng,X.; Xu,L.; Cheng,L.; Lu,X.; Jin,C.; Xie,T.; Yao,H.; Wu,N.
EPI592032	NP	China	2014-Mar-16	A/chicken/Jiangxi/12210/2014		Other Database Import	Lam,T.Y.; Zhou,B.; Wang,J.; Chai,Y.; Shen,Y.; Chen,X.; Ma,C.; Hong,W.; Chen,Y.; Zhang,Y.; Duan,L.; Chen,P.; Jiang,J.; Li,L.; Poon,L.M.; Webby,R.J.; Smith,D.K.; Leung,G.M.; Peiris,J.M.; Holmes,E.C.; Guan,Y.; Zhu,H.
EPI592046	NP	China	2014-Mar-16	A/chicken/Jiangxi/12221/2014		Other Database Import	Lam,T.Y.; Zhou,B.; Wang,J.; Chai,Y.; Shen,Y.; Chen,X.; Ma,C.; Hong,W.; Chen,Y.; Zhang,Y.; Duan,L.; Chen,P.; Jiang,J.; Li,L.; Poon,L.M.; Webby,R.J.; Smith,D.K.; Leung,G.M.; Peiris,J.M.; Holmes,E.C.; Guan,Y.; Zhu,H.
EPI592376	NP	China	2014-Mar-16	A/chicken/Jiangxi/12243/2014		Other Database Import	Lam,T.Y.; Zhou,B.; Wang,J.; Chai,Y.; Shen,Y.; Chen,X.; Ma,C.; Hong,W.; Chen,Y.; Zhang,Y.; Duan,L.; Chen,P.; Jiang,J.; Li,L.; Poon,L.M.; Webby,R.J.; Smith,D.K.; Leung,G.M.; Peiris,J.M.; Holmes,E.C.; Guan,Y.; Zhu,H.
EPI600212	NP	China	2014-Mar-30	A/chicken/Jiangxi/13202/2014		Other Database Import	Ma,C.; Lam,T.T.Y.; Chai,Y.; Wang,J.; Fan,X.; Hong,W.; Zhang,Y.; Li,L.; Liu,Y.; Smith,D.K.; Webby,R.J.; Peiris,J.S.M.; Zhu,H.; Guan,Y.
EPI602245	NP	China	2014-Mar-30	A/chicken/Jiangxi/13217/2014		Other Database Import	Ma,C.; Lam,T.T.Y.; Chai,Y.; Wang,J.; Fan,X.; Hong,W.; Zhang,Y.; Li,L.; Liu,Y.; Smith,D.K.; Webby,R.J.; Peiris,J.S.M.; Zhu,H.; Guan,Y.
EPI592137	NP	China	2014-Mar-30	A/chicken/Jiangxi/13230/2014		Other Database Import	Lam,T.Y.; Zhou,B.; Wang,J.; Chai,Y.; Shen,Y.; Chen,X.; Ma,C.; Hong,W.; Chen,Y.; Zhang,Y.; Duan,L.; Chen,P.; Jiang,J.; Li,L.; Poon,L.M.; Webby,R.J.; Smith,D.K.; Leung,G.M.; Peiris,J.M.; Holmes,E.C.; Guan,Y.; Zhu,H.
EPI602273	NP	China	2014-Mar-30	A/chicken/Jiangxi/13238/2014		Other Database Import	Ma,C.; Lam,T.T.Y.; Chai,Y.; Wang,J.; Fan,X.; Hong,W.; Zhang,Y.; Li,L.; Liu,Y.; Smith,D.K.; Webby,R.J.; Peiris,J.S.M.; Zhu,H.; Guan,Y.
EPI602214	NP	China	2014-Mar-30	A/chicken/Jiangxi/13249/2014		Other Database Import	Ma,C.; Lam,T.T.Y.; Chai,Y.; Wang,J.; Fan,X.; Hong,W.; Zhang,Y.; Li,L.; Liu,Y.; Smith,D.K.; Webby,R.J.; Peiris,J.S.M.; Zhu,H.; Guan,Y.
EPI602161	NP	China	2014-Mar-30	A/chicken/Jiangxi/13274/2014		Other Database Import	Ma,C.; Lam,T.T.Y.; Chai,Y.; Wang,J.; Fan,X.; Hong,W.; Zhang,Y.; Li,L.; Liu,Y.; Smith,D.K.; Webby,R.J.; Peiris,J.S.M.; Zhu,H.; Guan,Y.
EPI964994	NP	Bangladesh	2014-Nov-16	A/duck/Bangladesh/23858/2014		Other Database Import	Marinova Petkova,A.; Shanmuganatham,K.; Feeroz,M.M.; Jones Engel,L.; Hasan,M.K.; Akhtar,S.; Turner,J.; Walker,D.; Seiler,P.; Franks,J.; McKenzie,P.; Krauss,S.; Webby,R.J.; Webster,R.G.; Hasan,K.; Seiler,J.
EPI1061143	NP	China	2014-Nov-20	A/goose/Zhejiang/1120078/2014		Other Database Import	Wu,H.; Lu,R.; Peng,X.; Liu,F.; Cheng,L.; Wu,N.
EPI1061145	NP	China	2014-Nov-20	A/goose/Zhejiang/1120084/2014		Other Database Import	Wu,H.; Lu,R.; Peng,X.; Liu,F.; Cheng,L.; Wu,N.
EPI681302	NP	China	2014-Nov-20	A/goose/Zhejiang/112071/2014		Other Database Import	Wu,H.; Peng,X.; Cheng,L.; Lu,X.; Jin,C.; Xie,T.; Yao,H.; Wu,N.
EPI580276	NP	China	2014-Nov-30	A/Chicken/Guangdong/DG479/2014	South China Agricultural University	South China Agricultural University	Shumin,Xie;Weixin,Jia;Yicun,Lin;Kaixiang,Xing;Xingxing,Ren;Wenbao,Qi;Ming,Liao
EPI736692	NP	China	2014-Oct-12	A/duck/Guizhou/013/2014		Other Database Import	Duan,Z.; Chen,J.; Ji,X.; Xu,H.; Ruan,Y.; Zhao,J.
EPI596611	NP	Vietnam	2014-Oct-13	A/duck/Vietnam/LBM758/2014		Other Database Import	Soda,K.; Hotta,K.; Trang,H.U.; Le,Q.M.; Yamashiro,T.; Ito,T.
EPI596587	NP	Vietnam	2014-Oct-13	A/muscovy-duck/Vietnam/LBM754/2014		Other Database Import	Soda,K.; Hotta,K.; Trang,H.U.; Le,Q.M.; Yamashiro,T.; Ito,T.
EPI839148	NP	China	2014-Sep-08	A/Gallinula-chloropus/Guangdong/GZ174/2014		Other Database Import	Kang,Y.; Feng,M.; Ren,T.
EPI681129	NP	China	2014-Sep-25	A/chicken/Zhejiang/925134/2014		Other Database Import	Wu,H.; Peng,X.; Cheng,L.; Lu,X.; Jin,C.; Xie,T.; Yao,H.; Wu,N.
EPI681319	NP	China	2014-Sep-25	A/goose/Zhejiang/925106/2014		Other Database Import	Wu,H.; Peng,X.; Cheng,L.; Lu,X.; Jin,C.; Xie,T.; Yao,H.; Wu,N.
EPI760214	NP	China	2015-Apr-06	A/duck/Hunan/161/2015		Other Database Import	Li,X.; Yang,J.; Liu,B.; Jia,Y.; Guo,J.; Gao,X.; Weng,S.; Yang,M.; Wang,L.; Wang,L.F.; Cui,J.; Chen,H.; Zhu,Q.
EPI1060784	NP	Hong-Kong-(SAR)	2015-Apr-30	A/oriental-magpie-robin/HK/6154/2015		Other Database Import	Hui,P.Y.; Chan,L.Y.; Kuok,I.T.; Mok,K.P.; Yang,Z.; Li,R.; Luk,S.M.; Lee,F.; Yen,H.L.; Zhu,H.; Guan,Y.; Nicholls,J.; Peiris,M.; Chan,C.W.
EPI965419	NP	Bangladesh	2015-Aug-25	A/quail/Bangladesh/25987/2015		Other Database Import	Barman,S.; Marinova Petkova,A.; Hasan,M.K.; Akhtar,S.; Turner,J.C.; Franks,J.; Walker,D.; Seiler,P.; Friedman,K.; Kercher,L.; Kayali,G.; Jones Engel,L.; McKenzie,P.; Krauss,S.; Webby,R.J.; Feeroz,M.M.; Webster,R.G.
EPI693707	NP	Mongolia	2015-Aug-30	A/duck/Mongolia/83/2015		Other Database Import	Matsuno,K.; Okamatsu,M.; Kida,H.; Sakoda,Y.; Matuno,K.; Hatamachi,J.
EPI895180	NP	China	2015-Dec-12	A/chicken/Ganzhou/GZ27/2015		Other Database Import	Chen,L.J.; Tian,J.H.; Lin,X.D.; Liao,Y.; Shi,M.; Zhang,Y.Z.
EPI683068	NP	China	2015	A/chicken/Wenzhou/RAQL01/2015		Other Database Import	Chen,L. J.; Lin,X. D.; Guo,W. P.; Tian,J. H.; Zhang,Y. Z.
EPI683052	NP	China	2015	A/turtledove/Wuhan/HKBJ43/2015		Other Database Import	Chen,L. J.; Lin,X. D.; Guo,W. P.; Tian,J. H.; Zhang,Y. Z.
EPI775082	NP	Vietnam	2015-Jan-06	A/duck/CaMau/0237/2015		Other Database Import	Cao,B.V.; Le Ha,T.D.; Mai,V.N.; Dang Trinh,M.A.; Le Phan,K.N.; Vo Tran,N.T.; Hoang,T.
EPI775090	NP	Vietnam	2015-Jan-06	A/duck/CaMau/0238/2015		Other Database Import	Cao,B.V.; Le Ha,T.D.; Mai,V.N.; Dang Trinh,M.A.; Le Phan,K.N.; Vo Tran,N.T.; Hoang,T.
EPI590550	NP	Taiwan	2015-Jan-15	A/chicken/PT/a158/2015		Other Database Import	Cheng,M. C.; Tan,D. H.; Chen,L. H.; Liu,Y. P.; Lin,Y. J.; Tsai,H. J.; Chang,P. C.
EPI690545	NP	Taiwan	2015-Jan-17	A/goose/Taiwan/TNC4/2015		Other Database Import	Huang,P.Y.; Lee,C.D.; Yip,C.H.; Cheung,C.L.; Yu,G.; Lam,T.T.; Smith,D.K.; Zhu,H.; Guan,Y.; Lee,C.C.; Lam,T.Y.
EPI690721	NP	Taiwan	2015-Jan-17	A/goose/Taiwan/TNO12/2015		Other Database Import	Huang,P.Y.; Lee,C.D.; Yip,C.H.; Cheung,C.L.; Yu,G.; Lam,T.T.; Smith,D.K.; Zhu,H.; Guan,Y.; Lee,C.C.; Lam,T.Y.
EPI946750	NP	Japan	2015-Jul-07	A/chicken/Japan/AQ-HE61/2015		Other Database Import	Shibata,A.; Hiono,T.; Okamatsu,M.; Osaka,H.; Sakoda,Y.
EPI965394	NP	Bangladesh	2015-Jul-10	A/duck/Bangladesh/25891/2015		Other Database Import	Barman,S.; Marinova Petkova,A.; Hasan,M.K.; Akhtar,S.; Turner,J.C.; Franks,J.; Walker,D.; Seiler,P.; Friedman,K.; Kercher,L.; Kayali,G.; Jones Engel,L.; McKenzie,P.; Krauss,S.; Webby,R.J.; Feeroz,M.M.; Webster,R.G.
EPI729787	NP	China	2015-May-01	A/chicken/Shanghai/06/2015		Other Database Import	Ge,F.
EPI641385	NP	China	2015-May-05	A/chicken/Shandong/1167/2015		Other Database Import	Tan,L.; Xu,C.T.; Zhao,X.; Huang,Q.; Huang,Y.; Zhu,F.; Gao,D.; Zhang,L.; Yang,S.; Zhang,X.
EPI753534	NP	China	2015-May-14	A/chicken/Zhejiang/514132/2015		Other Database Import	Wu,H.; Lu,R.; Peng,X.; Cheng,L.; Jin,C.; Lu,X.; Xie,T.; Yao,H.; Wu,N.
EPI895179	NP	China	2016-Feb-19	A/chicken/Taishun/TS2/2016		Other Database Import	Chen,L.J.; Tian,J.H.; Lin,X.D.; Liao,Y.; Shi,M.; Zhang,Y.Z.

## Sheet: NA-N1
Table S1. GISAID acknowledgements for NA segment.
Isolate ID	Segment	Country	Collection date	Isolate name	Originating Laboratory	Submitting Laboratory	Authors
EPI5787	NA	China	1996	A/Goose/Guangdong/1/96		Other Database Import
EPI507740	NA	Italy	1999-Dec-23	A/turkey/Italy/4829/1999		Istituto Zooprofilattico Sperimentale Delle Venezie
EPI102161	NA	Taiwan	2000	A/duck/Taiwan/29-3/00		Other Database Import
EPI99342	NA	China	2000	A/Goose/Huadong/1/2000		Other Database Import
EPI102169	NA	Taiwan	2001	A/chicken/Taiwan/1212/01		Other Database Import
EPI236712	NA	Vietnam	2001	A/goose/Viet_Nam/113/2001		Other Database Import	Kim,L.M.; Scott,M.A.; Suarez,D.L.; Spackman,E.; Swayne,D.E.; Afonso,C.L.
EPI283334	NA	Hong_Kong_(SAR)	2001	A/quail/Hong_Kong/FB801/2001		Other Database Import	Ozaki,H.; Guan,Y.; Peiris,M.; Webster,R.G.; Webby,R.J.
EPI283342	NA	Hong_Kong_(SAR)	2001	A/quail/Hong_Kong/SF104/2001		Other Database Import	Ozaki,H.; Guan,Y.; Peiris,M.; Webster,R.G.; Webby,R.J.
EPI235799	NA	China	2002	A/chicken/Jilin/hd/2002		Other Database Import	Liao,X.; Zhang,X.; Wang,J.; Yu,J.; Jin,N.
EPI102187	NA	Taiwan	2002	A/chicken/Taiwan/0208/02		Other Database Import
EPI283414	NA	Hong_Kong_(SAR)	2002	A/quail/Hong_Kong/YU421/2002		Other Database Import	Ozaki,H.; Guan,Y.; Peiris,M.; Webster,R.G.; Webby,R.J.
EPI327178	NA	Thailand	2003-Dec-30	A/openbill_stork/Thailand/VSMU-12-BKK/2003		Other Database Import	Chaichoun,K.; Phonaknguen,R.; Sariya,L.; Tangsudjai,S.; Phompiram,P.; Wiriyarat,W.; Ratanakorn,P.
EPI23087	NA	China	2003	A/Ck/HK/NT93/2003		Other Database Import
EPI136341	NA	China	2003	A/duck/Yunnan/6080/2003		Other Database Import
EPI136360	NA	China	2003	A/duck/Yunnan/6603/2003		Other Database Import
EPI135752	NA	China	2003	A/partridge/Shantou/2886/2003		Other Database Import
EPI135752	NA	China	2003	A/partridge/Shantou/2886/2003		Other Database Import
EPI121058	NA	China	2003	A/quail/Shantou/3692/2003		Other Database Import
EPI514997	NA	Malaysia	2004-Aug-17	A/chicken/Malaysia/5744/2004		Other Database Import	Lim,K.L.; Abdullah Zawawi,N.H.; Bejo,M.H.; Ideris,A.; Omar,A.R.
EPI327174	NA	Thailand	2004-Feb-05	A/openbill_stork/Thailand/VSMU-4-NSN/2004		Other Database Import	Chaichoun,K.
EPI327176	NA	Thailand	2004-Feb-13	A/openbill_stork/Thailand/VSMU-6-BKK/2004		Other Database Import	Chaichoun,K.; Phonaknguen,R.; Sariya,L.; Tangsudjai,S.; Phompiram,P.; Wiriyarat,W.; Ratanakorn,P.
EPI167184	NA	Thailand	2004	A/chicken/Angthong/NIAH8334/2004		Other Database Import
EPI25015	NA	China	2004	A/chicken/Guangdong/191/04		Other Database Import
EPI24693	NA	China	2004	A/chicken/Hubei/327/2004		Other Database Import
EPI228886	NA	China	2004	A/chicken/Jilin/hl/2004		Other Database Import	Liao,X.; Zhang,X.; Wang,J.; Yu,J.; Jin,N.
EPI102201	NA	Taiwan	2004	A/chicken/Taiwan/0305/04		Other Database Import
EPI171039	NA	Vietnam	2004	A/chicken/Vietnam/925/2004		Other Database Import
EPI121094	NA	China	2004	A/chukkar/Shantou/2113/2004		Other Database Import
EPI25734	NA	China	2004	A/duck/Shandong/093/2004		Other Database Import
EPI103879	NA	Vietnam	2004	A/duck/Vietnam/219/2004		Other Database Import
EPI135828	NA	China	2004	A/silky_chicken/Shantou/475/2004		Other Database Import
EPI25086	NA	China	2004	A/tree_sparrow/Henan/3/2004		Other Database Import
EPI229447	NA	Indonesia	2004-Jan-15	A/quail/Yogjakarta/UT1023/2004		Other Database Import	Tankano,R.
EPI170593	NA	Vietnam	2005-Dec-19	A/duck/Vietnam/219/2005		Other Database Import
EPI97277	NA	China	2005	A/Bar-headed_Goose/Qinghai/68/05		Other Database Import
EPI181505	NA	Indonesia	2005	A/chicken/Bali/UT2092/2005		Other Database Import
EPI226944	NA	Indonesia	2005	A/chicken/Dairi/BPPVI/2005		Other Database Import	Smith,G.; Naipospos,T.S.; Usman,T.; Nguyen,T.; de Jong,M.; Peiris,J.; Guan,Y.
EPI227039	NA	Indonesia	2005	A/chicken/Simalanggang/BPPVI/2005		Other Database Import	Smith,G.; Naipospos,T.S.; Usman,T.; Nguyen,T.; de Jong,M.; Peiris,J.; Guan,Y.
EPI327594	NA	Vietnam	2005	A/chicken/Vietnam/NCVD10/2005		Other Database Import	The NIAID Influenza Genome Sequencing Consortium
EPI275896	NA	China	2005	A/chicken/Xinjiang/17/2005		Other Database Import	Li,Y.; Shi,J.; Zhong,G.; Deng,G.; Tian,G.; Ge,J.; Zeng,X.; Song,J.; Zhao,D.; Liu,L.; Jiang,Y.; Guan,Y.; Bu,Z.; Chen,H.
EPI227140	NA	Vietnam	2005	A/duck/Lang_Son/201/2005		Other Database Import	Kim,L.M.; Scott,M.A.; Suarez,D.L.; Spackman,E.; Swayne,D.E.; Afonso,C.L.
EPI97307	NA	China	2005	A/Goose/Shantou/1621/05		Other Database Import
EPI107245	NA	Thailand	2005	A/open-billed_stork/Nakhonsawan/BBD1521J/2005		Other Database Import
EPI111028	NA	Thailand	2005	A/open-billed_stork/Nakhonsawan/BBD3616M/05		Other Database Import
EPI167186	NA	Thailand	2005	A/quail/Nakhon_Pathom/NIAH7562/2005		Other Database Import
EPI166657	NA	Kazakhstan	2005-Jun-01	A/chicken/Astana/6/2005		Other Database Import	Strochkov,V.; Sandybayev,N.; Sultankulova,K.; Zaitsev,V.; Mamadaliyev,S.
EPI764412	NA	China	2005-Nov-01	A/turtle_dove/Guangdong/300/2005		Other Database Import	Jiao,P.; Cheng,Y.; Liao,M.
EPI313106	NA	India	2006-Feb-01	A/chicken/Nandurbar/7972/2006		Other Database Import	Tosh,C.; Nagarajan,S.; Murugkar,H.V.; Behera,P.; Kulkarni,D.D.; Dubey,S.C.; Tosh,C.; Nagarajan,S.; Murugkar,H.V.; Venkatesh,G.; Behera,P.; Khandia,R.; Tripathi,S.; Jain,R.; Dubey,S.C.
EPI175678	NA	Pakistan	2006	A/chicken/Rawalakot/NARC2441A/2006		Other Database Import
EPI283997	NA	Cambodia	2006	A/duck/Cambodia/D1KP/2006		Other Database Import	Buchy,P.; Mardy,S.
EPI112197	NA	China	2006	A/duck/Guiyang/1558/2006		Other Database Import
EPI112235	NA	China	2006	A/goose/Guangxi/1898/2006		Other Database Import
EPI276072	NA	China	2006	A/shrike/Tibet/13/2006		Other Database Import	Li,Y.; Shi,J.; Zhong,G.; Deng,G.; Tian,G.; Ge,J.; Zeng,X.; Song,J.; Zhao,D.; Liu,L.; Jiang,Y.; Guan,Y.; Bu,Z.; Chen,H.
EPI241731	NA	Denmark	2006-Mar-21	A/grey_lag_goose/Denmark/6692/2006	National Veterinary Institute	Statens Serum Institute	Bragstad,K.; Fomsgaard,A.; Jorgensen,P.H.; Hammer,A.S.; Kabell,S.; Handberg,K.
EPI383689	NA	Vietnam	2007-Aug-01	A/duck/Vietnam/TY114/2007		Other Database Import	Takano,R.
EPI373009	NA	Egypt	2007	A/chicken/Egypt/9403-NAMRU3/2007	U.S. Naval Medical Research Unit No.3	Centers for Disease Control and Prevention	Younan, M.; Poh, M.K.; Elassal, E.; Simpson, N.; Jones, J.; ElBadry, M.A.; Naguib, A.;Saied, I.; Kandeel, A.; Cornelius, C.
EPI132667	NA	Kuwait	2007	A/chicken/Kuwait/KISR8/2007		Other Database Import
EPI180857	NA	Lao, People's Democratic Republic	2007	A/chicken/Laos/A0464/2007		Other Database Import
EPI154506	NA	Saudi_Arabia	2007	A/chicken/Saudi_Arabia/6732-4/2007		Istituto Zooprofilattico Sperimentale Delle Venezie
EPI167491	NA	Vietnam	2007	A/chicken/Vietnam/NCVD-3/2007		Other Database Import
EPI167971	NA	Hong_Kong_(SAR)	2007	A/common_magpie/Hong_Kong/5052/2007		Other Database Import
EPI285616	NA	Vietnam	2007	A/duck/Can_Tho/07-28/2007		Other Database Import	Kim,L.M.; Scott,M.A.; Suarez,D.L.; Spackman,E.; Swayne,D.E.; Afonso,C.L.
EPI140633	NA	Vietnam	2007	A/duck/Vietnam/7/2007		Other Database Import
EPI350652	NA	Vietnam	2007	A/duck/Vietnam/NCVD-126/2007	National Centre of Veterinary Diagnostics	Centers for Disease Control and Prevention	Davis,Todd; Rivailler,Pierre; Nguyen,Tung
EPI167515	NA	Vietnam	2007	A/duck/Vietnam/NCVD-6/2007		Other Database Import
EPI162923	NA	Germany	2007	A/great_crested_grebe/Germany/R1406/07		Friedrich-Loeffler-Institut
EPI286428	NA	Vietnam	2007	A/muscovy_duck/Ha_Nam/07-47/2007		Other Database Import	Kim,L.M.; Scott,M.A.; Suarez,D.L.; Spackman,E.; Swayne,D.E.; Afonso,C.L.
EPI140737	NA	Vietnam	2007	A/Muscovy_duck/Vietnam/49/2007		Other Database Import
EPI140777	NA	Vietnam	2007	A/Muscovy_duck/Vietnam/54/2007		Other Database Import
EPI408136	NA	Myanmar	2007	A/village_chicken/Kyaing_Tong/2433/2007		Other Database Import	Saito,T.; Watanabe,C.; Hayashi,T.; Uchida,Y.; Myint,W.W.; Thein,W.Z.; Takemae,N.; Mase,M.; Okamatsu,M.; Mar,A.; Mon,C.C.; Gawng,L.T.; Sann,K.; Kyi,T.A.; Yamaguchi,S.
EPI326931	NA	Korea,_Republic_of	2007-Nov-29	A/duck/Korea/GJ74/2007		Other Database Import	Choi,J.G.; Kang,H.M.; Kim,M.C.; Paek,M.R.; Kim,H.R.; Kim,B.S.; Kwon,J.H.; Kim,J.H.; Lee,Y.J.
EPI341768	NA	China	2007-Oct-01	A/mallard/Sanjiang/390/2007		Other Database Import	Cheng,C.
EPI295969	NA	India	2008-Apr-01	A/duck/Tripura/103597/2008		Other Database Import	Tosh,C.; Murugkar,H.V.; Nagarajan,S.; Jain,R.; Kulkarni,D.D.; Dubey,S.C.
EPI221250	NA	India	2008-Dec-16	A/chicken/India/WB-NIV16915/2008		Other Database Import	Pal,B.; Keng,S.; Mullick,J.; Pawar,S.D.; Koratkar,S.; Mishra,A.C.
EPI220382	NA	Thailand	2008	A/chicken/Uthaithani/NIAH115067/2008		Other Database Import	Nuansrichay,B.; Parchariyanon,S.; Amonsin,A.; Suwannakarn,K.; Poovorawan,Y.
EPI350526	NA	Vietnam	2008	A/duck/Vietnam/NCVD-010/2008	National Centre of Veterinary Diagnostics	Centers for Disease Control and Prevention	Davis,Todd; Rivailler,Pierre; Nguyen,Tung
EPI168050	NA	Hong_Kong_(SAR)	2008	A/magpie_robin/Hong_Kong/1097/2008		Other Database Import
EPI231219	NA	Korea,_Republic_of	2008-Oct-01	A/spot-billed_duck/Korea/625/2008		Other Database Import	Kim,H.R.; Lee,Y.J.; Lee,K.K.; Oem,J.K.; Kim,S.H.; Joo,Y.S.; Lee,O.S.; Lee,M.H.; Park,C.K.
EPI231171	NA	Korea,_Republic_of	2008-Sep-01	A/spot-billed_duck/Korea/536/2008		Other Database Import	Kim,H.R.; Lee,Y.J.; Lee,K.K.; Oem,J.K.; Kim,S.H.; Joo,Y.S.; Lee,O.S.; Lee,M.H.; Park,C.K.
EPI231195	NA	Korea,_Republic_of	2008-Sep-01	A/spot-billed_duck/Korea/545/2008		Other Database Import	Kim,H.R.; Lee,Y.J.; Lee,K.K.; Oem,J.K.; Kim,S.H.; Joo,Y.S.; Lee,O.S.; Lee,M.H.; Park,C.K.
EPI306414	NA	Korea,_Republic_of	2009-Feb-01	A/mallard/Korea/KNU_YP09/2009		Other Database Import	Lee,J.H.; Sung,H.W.; Kwon,H.M.
EPI287633	NA	India	2009	A/chicken/West_Bengal/148713/2009		Other Database Import	Tosh,C.; Nagarajan,S.; Murugkar,H.V.; Jain,R.; Kulkarni,D.D.; Dubey,S.C.
EPI351573	NA	Vietnam	2009	A/ostrich/Vietnam/NCVD-373/2009	National Centre of Veterinary Diagnostics	Centers for Disease Control and Prevention	Davis,Todd; Rivailler,Pierre; Nguyen,Tung
EPI540238	NA	Bangladesh	2009-Jan-28	A/duck/Bangladesh/1352/2009	Institute of Epidemiology Disease Control and Research (IEDCR) & Bangladesh National Influenza Centre (NIC)	Centers for Disease Control and Prevention	Gerloff, Nancy; Simpson, Natosha; Davis, C. Todd
EPI352491	NA	India	2009-Jan-29	A/chicken/West_Bengal/155508/2009		Other Database Import	Tosh,C.; Syed,Z.; Nagarajan,S.; Murugkar,H.V.; Dubey,S.C.
EPI267932	NA	Mongolia	2010	A/whooper_swan/Mongolia/1/2010		Other Database Import	Jizou,M.; Kida,H.; Sakoda,Y.; Okamatsu,M.
EPI485316	NA	Mongolia	2010-Jul-24	A/common_goldeneye/Mongolia/1216/2010		Other Database Import	Leung,C.Y.; Gilbert,M.; Chow,K.-C.; Ho,C.-K.; Tang,S.-C.; Guan,Y.; Peiris,M.
EPI335204	NA	Lao, People's Democratic Republic	2010-Mar-01	A/duck/Lao/19/2010		Other Database Import	Sonnberg,S.; Phommachanh,P.; Naipospos,T.S.P.; McKenzie,J.; Chanthavisouk,C.; Pathammavong,S.; Darnell,D.; Meeduangchanh,P.; Rubrum,A.M.; Souriya,M.; Khambounheuang,B.; Webby,R.J.; Douangngeun,B.; Webster,R.G.
EPI335091	NA	Lao, People's Democratic Republic	2010-Mar-01	A/duck/Lao/981/2010		Other Database Import	Sonnberg,S.; Phommachanh,P.; Naipospos,T.S.; McKenzie,J.; Chanthavisouk,C.; Pathammavong,S.; Darnell,D.; Meeduangchanh,P.; Rubrum,A.M.; Souriya,M.; Khambounheuang,B.; Webby,R.J.; Douangngeun,B.; Webster,R.G.; Naipospos,T.S.P.
EPI348866	NA	Vietnam	2010-Nov-16	A/duck/Vietnam/NCVD-456/2010	National Institute of Hygiene and Epidemiology	Centers for Disease Control and Prevention	Davis,Todd; Rivailler,Pierre; Nguyen,Tung
EPI447472	NA	Korea,_Republic_of	2010-Nov-26	A/Eurasian_eagle_owl/Korea/23/2010		Other Database Import	Choi,J.G.; Kang,H.M.; Jeon,W.J.; Choi,K.S.; Kim,K.I.; Song,B.M.; Lee,H.S.; Kim,J.H.; Lee,Y.J.
EPI308988	NA	Japan	2011-Feb-01	A/peregrine_falcon/Tochigi/15/2011		Other Database Import	Sakoda,Y.; Ito,H.; Uchida,Y.; Okamatsu,M.; Yamamoto,N.; Soda,K.; Nomura,N.; Kuribayashi,S.; Shichinohe,S.; Sunden,Y.; Umemura,T.; Usui,T.; Ozaki,H.; Yamaguchi,T.; Murase,T.; Ito,T.; Saito,T.; Takada,A.; Kida,H.; Jizou,M.
EPI448150	NA	Bangladesh	2011-Feb-13	A/crow/Bangladesh/1056/2011	Institute of Epidemiology Disease Control and Research (IEDCR) & Bangladesh National Influenza Centre (NIC)	Centers for Disease Control and Prevention	Gerloff, Nancy; Simpson, Natosha; Poh, Mee;Davis, Todd
EPI401454	NA	Japan	2011	A/chicken/Oita/1/2011		Other Database Import	Uchida,Y.; Suzuki,Y.; Shirakura,M.; Kawaguchi,A.; Nobusawa,E.; Tanikawa,T.; Hikono,H.; Takemae,N.; Mase,M.; Kanehira,K.; Hayashi,T.; Tagawa,Y.; Tashiro,M.; Saito,T.
EPI425087	NA	Vietnam	2011-Jun-15	A/chicken/Vietnam/NCVD-779/2011	National Centre of Veterinary Diagnostics	Centers for Disease Control and Prevention
EPI425503	NA	Vietnam	2011-Mar-18	A/duck/Vietnam/NCVD-946/2011	National Centre of Veterinary Diagnostics	Centers for Disease Control and Prevention
EPI461690	NA	China	2011-Nov-09	A/duck/Hunan/S4030/2011		Other Database Import	Deng,G.; Tan,D.; Shi,J.; Cui,P.; Jiang,Y.; Liu,L.; Tian,G.; Kawaoka,Y.; Li,C.; Chen,H.
EPI461765	NA	China	2011-Nov-13	A/duck/Hunan/S4234/2011		Other Database Import	Deng,G.; Tan,D.; Shi,J.; Cui,P.; Jiang,Y.; Liu,L.; Tian,G.; Kawaoka,Y.; Li,C.; Chen,H.
EPI425778	NA	Vietnam	2011-Sep-07	A/chicken/Vietnam/NCVD-1034/2011	National Centre of Veterinary Diagnostics	Centers for Disease Control and Prevention
EPI425810	NA	Vietnam	2011-Sep-07	A/duck/Vietnam/NCVD-1048/2011	National Centre of Veterinary Diagnostics	Centers for Disease Control and Prevention
EPI898843	NA	Vietnam	2012-Dec-07	A/duck/Vietnam/NCVD-0145/2012		Other Database Import	Davis,T.; Jang,Y.
EPI898867	NA	Vietnam	2012-Dec-17	A/duck/Vietnam/NCVD-0033/2012		Other Database Import	Davis,T.; Jang,Y.
EPI425327	NA	Vietnam	2012-Feb-08	A/muscovy_duck/Vietnam/NCVD-1220/2012	National Centre of Veterinary Diagnostics	Centers for Disease Control and Prevention
EPI559128	NA	Vietnam	2012-Feb-17	A/duck/Vietnam/NCVD-KA40/2012		Other Database Import	Lee,E.-K.; Kang,H.-M.; Kim,K.-I.; Choi,J.-G.; Long To,T.; Dang Nguyen,T.; Song,B.-M.; Jeong,J.; Choi,K.-S.; Kim,J.-Y.; Lee,H.-S.; Lee,Y.-J.; Kim,J.-H.
EPI381892	NA	Vietnam	2012-Feb-18	A/muscovy_duck/Vietnam/OIE-0043/2012		Other Database Import	Kida,H.; Sakoda,Y.; Okamatsu,M.; Nam,H.V.; Long,N.V.; Huy,C.D.; Tien,T.N.; Hatamachi,J.
EPI448278	NA	Bangladesh	2012-Feb-20	A/duck/Bangladesh/32077/2012	Institute of Epidemiology Disease Control and Research (IEDCR) & Bangladesh National Influenza Centre (NIC)	Centers for Disease Control and Prevention	Gerloff, Nancy; Simpson, Natosha; Poh, Mee;Davis, Todd
EPI644286	NA	India	2012-Feb-22	A/crow/India/02CA06/2012		Other Database Import	Nagarajan,S.; Jain,R.; Tosh,C.; Murugkar,H.V.; Kumar,M.; Kulkarni,D.D.
EPI685615	NA	India	2012	A/chicken/India/01CA01/2012		Other Database Import	Tosh,C.; Nagarajan,S.; Murugkar,H.V.; Kumar,M.; Jain,R.; Tripathi,S.; Syed,Z.; Behera,P.; Shukla,S.; Kulkarni,D.D.
EPI438144	NA	Vietnam	2012	A/muscovy_duck/Vietnam/LBM315/2012		Other Database Import	Azuma,N.; Nagai,Y.; Soda,K.; Hotta,K.; Ito,T.
EPI527333	NA	Bhutan	2012-Jan-23	A/chicken/Bhutan/507/2012		Other Database Import	Franks,J.S.; Tenzin,S.; Tshering,D.; Rai,P.; Lhamo,K.; Dahal,N.; Dukpa,K.
EPI425615	NA	Vietnam	2012-Mar-02	A/chicken/Vietnam/NCVD-1488/2012	National Centre of Veterinary Diagnostics	Centers for Disease Control and Prevention
EPI644378	NA	India	2012-Oct-19	A/turkey/India/10CA04/2012		Other Database Import	Nagarajan,S.; Tripathi,S.; Tosh,C.; Murugkar,H.V.; Kumar,M.; Kulkarni,D.D.
EPI425599	NA	Vietnam	2012-Sep-21	A/duck/Vietnam/NCVD-1463/2012	National Centre of Veterinary Diagnostics	Centers for Disease Control and Prevention
EPI545482	NA	Vietnam	2013-Jan-18	A/duck/Khanhhoa/CVVI-10/2013		Other Database Import	Nguyen,H.T.; Than,V.T.; Kim,W.
EPI542879	NA	Cambodia	2013-Jan-23	A/duck/Cambodia/X0124311/2013		Other Database Import	Buchy,P.
EPI899033	NA	Vietnam	2013-Jan-25	A/duck/Vietnam/NCVD-6137/2013		Other Database Import	Davis,T.; Jang,Y.
EPI898172	NA	Vietnam	2013-Jul-10	A/quail/Vietnam/NCVD-3791/2013		Other Database Import	Davis,T.; Jang,Y.
EPI898541	NA	Vietnam	2013-Jun-23	A/duck/Vietnam/NCVD-A3799/2013		Other Database Import	Davis,T.; Jang,Y.
EPI775113	NA	Vietnam	2013-Nov-11	A/domestic_duck/VinhLong/0186/2013		Other Database Import	Cao,B.V.; Le Ha,T.D.; Mai,V.N.; Dang Trinh,M.A.; Le Phan,K.N.; Vo Tran,N.T.; Hoang,T.
EPI898499	NA	Vietnam	2014-Apr-03	A/duck/Vietnam/NCVD14-A499/2014		Other Database Import	Davis,T.; Jang,Y.
EPI545509	NA	Vietnam	2014-Feb-16	A/duck/Khanhhoa/CVVI-37/2014		Other Database Import	Nguyen,H.T.; Than,V.T.; Kim,W.
EPI898442	NA	Vietnam	2014-Feb-17	A/chicken/Vietnam/NCVD14-A459/2014		Other Database Import	Davis,T.; Jang,Y.
EPI623554	NA	United Arab Emirates	2014-Nov-30	A/Hoabara/Dubai/2455.5/2014		Friedrich-Loeffler-Institut	Chen, H.; Chan, KH. ; Wong, PC. ; Woo, C.Y.P.
EPI893514	NA	Vietnam	2015-Aug-15	A/chicken/Vietnam/HU3-67/2015(H5N1)		Other Database Import	Nguyen,T.L.; Chu,D.C.; Hiono,T.; Matsuno,K.; Okamatsu,M.; Sakoda,Y.; Hatamachi,J.
EPI893526	NA	Vietnam	2015-Aug-15	A/chicken/Vietnam/HU3-83/2015(H5N1)		Other Database Import	Nguyen,T.L.; Chu,D.C.; Hiono,T.; Matsuno,K.; Okamatsu,M.; Sakoda,Y.; Hatamachi,J.
EPI965175	NA	Bangladesh	2015-Feb-25	A/duck/Bangladesh/24482/2015		Other Database Import	Marinova-Petkova,A.; Barman,S.; Hasan,M.K.; Akhtar,S.; Turner,J.C.; Franks,J.; Walker,D.; Seiler,P.; Friedman,K.; Kercher,L.; Kayali,G.; Jones-Engel,L.; McKenzie,P.; Krauss,S.; Webby,R.J.; Feeroz,M.M.; Webster,R.G.
EPI965166	NA	Bangladesh	2015-Jul-10	A/duck/Bangladesh/25890/2015		Other Database Import	Marinova-Petkova,A.; Barman,S.; Hasan,M.K.; Akhtar,S.; Turner,J.C.; Franks,J.; Walker,D.; Seiler,P.; Friedman,K.; Kercher,L.; Kayali,G.; Jones-Engel,L.; McKenzie,P.; Krauss,S.; Webby,R.J.; Feeroz,M.M.; Webster,R.G.
EPI719449	NA	Ghana	2015-Jul-27	A/duck/Ghana/15VIR5480-16/2015	Veterinary Services Directorate, Ministry of Food and Agriculture	Istituto Zooprofilattico Sperimentale Delle Venezie	Joseph,Awuni;Ben,Aniwa; Alice,Fusaro; Luca,Tassoni; Alessia,Schivo; Silvia,Ormelli; Giovanni,Cattoli; Isabella,Monne
EPI669831	NA	China	2015-May-12	A/Black-necked_Grebe/Inner_Mongolia/Lung3-2/2015_H5N1	CAS Key Laboratory of Pathogenic Microbiology and Immunology, Institute of Microbiology, Chinese Academy of Sciences	Institute of Microbiology, Chinese Academy of Sciences	Yuhai, Bi
EPI669807	NA	China	2015-May-12	A/Black-necked_Grebe/Inner_Mongolia/Lung3/2015_H5N1	Institute of Pathogen Biology, Taishan Medical College	Institute of Microbiology, Chinese Academy of Sciences	Weifeng, Shi
EPI965344	NA	Bangladesh	2016-Feb-04	A/duck/Bangladesh/28250/2016		Other Database Import	Barman,S.; Marinova-Petkova,A.; Hasan,M.K.; Akhtar,S.; Turner,J.C.; Franks,J.; Walker,D.; Seiler,P.; Friedman,K.; Kercher,L.; Kayali,G.; Jones-Engel,L.; McKenzie,P.; Krauss,S.; Webby,R.J.; Feeroz,M.M.; Webster,R.G.
EPI1009408	NA	Indonesia	2016-Mar-29	A/duck/Lumajang/04160417/2016		Other Database Import	Wibawa,H.; Poermadjaja,B.; Mulyawan,H.; Dharmawan,R.; Mahawan,T.; Hutagaol,N.M.; Miswati,Y.; Srihanto,E.A.; Hartawan,D.H.W.; Hendrawati,F.; Riyadi,A.; Deswarni; Tri Harsono,A.; Hartaningsih,N.; Azhar,M.; Stegemen,A.; Mc Grane,J.; Rasa,F.S.T.

## Sheet: M
Table S1. GISAID acknowledgements for M segment.
Isolate ID	Segment	Country	Collection date	Isolate name	Originating Laboratory	Submitting Laboratory	Authors
EPI89455	M	China	1979	A/duck/Hong-Kong/784/1979		Other Database Import
EPI590174	M	Hong-Kong-(SAR)	1980	A/duck/Hong-Kong/819/1980		Other Database Import	Kida,H.; Sakoda,Y.; Okamatsu,M.; Matsuno,K.; Masani,K.; Hatamachi,J.
EPI590181	M	Hong-Kong-(SAR)	1980	A/duck/Hong-Kong/820/1980		Other Database Import	Kida,H.; Sakoda,Y.; Okamatsu,M.; Matsuno,K.; Masani,K.; Hatamachi,J.
EPI5791	M	China	1996	A/Goose/Guangdong/1/96		Other Database Import
EPI341	M	Japan	1997	A/parakeet/Chiba/1/97		Other Database Import
EPI81760	M	China	1999	A/chicken/Guangxi/9/99		Other Database Import
EPI81751	M	China	2001	A/chicken/Guangdong/56/01		Other Database Import
EPI1486	M	Japan	2001	A/chicken/Osaka/aq58/2001		Other Database Import
EPI15224	M	Hong-Kong-(SAR)	2001	A/Duck/Hong-Kong/380.5/2001		Other Database Import	Kim,L.M.; Scott,M.A.; Suarez,D.L.; Spackman,E.; Swayne,D.E.; Afonso,C.L.
EPI268440	M	China	2001	A/duck/Shantou/1197/2001		Other Database Import	Huang,K.; Bahl,J.; Fan,X.; Vijaykrishna,D.; Cheung,C.; Webby,R.J.; Webster,R.G.; Chen,H.; Smith,G.J.D.; Peiris,M.J.S.; Guan,Y.
EPI235805	M	China	2002	A/chicken/Jilin/hd/2002		Other Database Import	Liao,X.; Zhang,X.; Wang,J.; Yu,J.; Jin,N.
EPI102087	M	Taiwan	2002	A/chicken/Taiwan/0222/02		Other Database Import
EPI102093	M	Taiwan	2002	A/chicken/Taiwan/0408/02		Other Database Import
EPI102096	M	Taiwan	2002	A/chicken/Taiwan/PF1/02		Other Database Import
EPI102102	M	Taiwan	2002	A/chicken/Taiwan/PF3/02		Other Database Import
EPI1540	M	Japan	2002	A/chicken/Yokohama/aq134/2002		Other Database Import
EPI268393	M	China	2002	A/duck/Shantou/1706/2002		Other Database Import	Huang,K.; Bahl,J.; Fan,X.; Vijaykrishna,D.; Cheung,C.; Webby,R.J.; Webster,R.G.; Chen,H.; Smith,G.J.D.; Peiris,M.J.S.; Guan,Y.
EPI268391	M	China	2002	A/duck/Shantou/2061/2002		Other Database Import	Huang,K.; Bahl,J.; Fan,X.; Vijaykrishna,D.; Cheung,C.; Webby,R.J.; Webster,R.G.; Chen,H.; Smith,G.J.D.; Peiris,M.J.S.; Guan,Y.
EPI376201	M	China	2003-Apr-01	A/duck/Fujian/MH/2003		Other Database Import	Fu,G.; Huang,Y.
EPI184112	M	Pakistan	2003	A/chicken/Karachi/NARC-23/2003		Other Database Import	Abbas,M.A.; Spackman,E.; Ahmed,Z.; Naeem,K.; Siddique,N.; Swayne,D.; Sarmento,L.; Hameed,A.
EPI25030	M	China	2004	A/chicken/Guangdong/178/04		Other Database Import
EPI25017	M	China	2004	A/chicken/Guangdong/191/04		Other Database Import
EPI167201	M	Thailand	2004	A/chicken/Kohn-Kaen/NIAH330/2004		Other Database Import
EPI171046	M	Vietnam	2004	A/chicken/Vietnam/933/2004		Other Database Import
EPI268472	M	China	2004	A/duck/Hunan/3748/2004		Other Database Import	Huang,K.; Bahl,J.; Fan,X.; Vijaykrishna,D.; Cheung,C.; Webby,R.J.; Webster,R.G.; Chen,H.; Smith,G.J.D.; Peiris,M.J.S.; Guan,Y.
EPI107186	M	Thailand	2004	A/open-billed-stork/Nakhonsawan/BBD0104F/2004		Other Database Import
EPI170707	M	Vietnam	2005-Dec-06	A/duck/Vietnam/203/2005		Other Database Import
EPI170623	M	Vietnam	2005-Dec-16	A/duck/Vietnam/215/2005		Other Database Import
EPI170616	M	Vietnam	2005-Dec-18	A/chicken/Vietnam/216/2005		Other Database Import
EPI153645	M	Israel	2005	A/chicken/Israel/793/2005		Other Database Import
EPI227011	M	Vietnam	2005	A/chicken/Ninh-Binh/209/2005		Other Database Import	Kim,L.M.; Scott,M.A.; Suarez,D.L.; Spackman,E.; Swayne,D.E.; Afonso,C.L.
EPI275873	M	China	2005	A/chicken/Sichuan/81/2005		Other Database Import	Li,Y.; Shi,J.; Zhong,G.; Deng,G.; Tian,G.; Ge,J.; Zeng,X.; Song,J.; Zhao,D.; Liu,L.; Jiang,Y.; Guan,Y.; Bu,Z.; Chen,H.
EPI47316	M	Vietnam	2005	A/chicken/Viet-Nam/10/2005		Other Database Import
EPI47335	M	Vietnam	2005	A/chicken/Viet-Nam/11/2005		Other Database Import
EPI47297	M	Vietnam	2005	A/chicken/Viet-Nam/9/2005		Other Database Import
EPI268329	M	China	2005	A/duck/Fujian/629/2005		Other Database Import	Huang,K.; Bahl,J.; Fan,X.; Vijaykrishna,D.; Cheung,C.; Webby,R.J.; Webster,R.G.; Chen,H.; Smith,G.J.D.; Peiris,M.J.S.; Guan,Y.
EPI268337	M	China	2005	A/duck/Guangxi/141/2005		Other Database Import	Huang,K.; Bahl,J.; Fan,X.; Vijaykrishna,D.; Cheung,C.; Webby,R.J.; Webster,R.G.; Chen,H.; Smith,G.J.D.; Peiris,M.J.S.; Guan,Y.
EPI268354	M	China	2005	A/duck/Shantou/2472/2005		Other Database Import	Huang,K.; Bahl,J.; Fan,X.; Vijaykrishna,D.; Cheung,C.; Webby,R.J.; Webster,R.G.; Chen,H.; Smith,G.J.D.; Peiris,M.J.S.; Guan,Y.
EPI111056	M	Thailand	2005	A/open-billed-stork/Nakhonsawan/BBD2416F/05		Other Database Import
EPI167212	M	Thailand	2005	A/pigeon/Thailand/VSMU-13-KRI/2005		Other Database Import
EPI363522	M	China	2006-Feb-01	A/duck/Guizhou/1084/2006		Other Database Import	Huang,K.; Zhu,H.; Fan,X.; Wang,J.; Cheung,C.L.; Duan,L.; Hong,W.; Liu,Y.; Li,L.; Smith,D.K.; Chen,H.; Webster,R.G.; Webby,R.J.; Peiris,M.; Guan,Y.; Cheung,C. L.
EPI122592	M	China	2006	A/bird/Guangxi/H1/2006		Other Database Import
EPI47126	M	Afghanistan	2006	A/chicken/Afghanistan/1207/2006		Other Database Import
EPI58564	M	Afghanistan	2006	A/chicken/Afghanistan/1573-47/2006		Other Database Import
EPI58583	M	Afghanistan	2006	A/chicken/Afghanistan/1573-65/2006		Other Database Import
EPI60312	M	Afghanistan	2006	A/chicken/Afghanistan/1573-7/2006		Other Database Import
EPI275833	M	China	2006	A/chicken/Ningxia/24/2006		Other Database Import	Li,Y.; Shi,J.; Zhong,G.; Deng,G.; Tian,G.; Ge,J.; Zeng,X.; Song,J.; Zhao,D.; Liu,L.; Jiang,Y.; Guan,Y.; Bu,Z.; Chen,H.
EPI408137	M	Myanmar	2006	A/chicken/Pyigyitagon/204/2006		Other Database Import	Saito,T.; Watanabe,C.; Hayashi,T.; Uchida,Y.; Myint,W.W.; Thein,W.Z.; Takemae,N.; Mase,M.; Okamatsu,M.; Mar,A.; Mon,C.C.; Gawng,L.T.; Sann,K.; Kyi,T.A.; Yamaguchi,S.
EPI368249	M	Thailand	2006	A/duck/Thailand/TS01/2006		Other Database Import	Songserm,T.; Wiboon ut,S.; Kanchongkittiphon,W.; Na Ek,P.; Thitithanyanont,A.
EPI276081	M	China	2006	A/wild-duck/Liaoning/8/2006		Other Database Import	Li,Y.; Shi,J.; Zhong,G.; Deng,G.; Tian,G.; Ge,J.; Zeng,X.; Song,J.; Zhao,D.; Liu,L.; Jiang,Y.; Guan,Y.; Bu,Z.; Chen,H.
EPI363642	M	China	2006-Jul-01	A/duck/Shantou/14167/2006		Other Database Import	Huang,K.; Zhu,H.; Fan,X.; Wang,J.; Cheung,C.L.; Duan,L.; Hong,W.; Liu,Y.; Li,L.; Smith,D.K.; Chen,H.; Webster,R.G.; Webby,R.J.; Peiris,M.; Guan,Y.; Cheung,C. L.
EPI363458	M	China	2006-Mar-01	A/duck/Guangxi/1074/2006		Other Database Import	Huang,K.; Zhu,H.; Fan,X.; Wang,J.; Cheung,C.L.; Duan,L.; Hong,W.; Liu,Y.; Li,L.; Smith,D.K.; Chen,H.; Webster,R.G.; Webby,R.J.; Peiris,M.; Guan,Y.; Cheung,C. L.
EPI177765	M	Pakistan	2006-May-02	A/chicken/Pakistan/UDL-01/2006		Other Database Import
EPI365086	M	China	2006-Nov-01	A/duck/Fujian/10950/2006		Other Database Import	Huang,K.; Zhu,H.; Fan,X.; Wang,J.; Cheung,C.L.; Duan,L.; Hong,W.; Liu,Y.; Li,L.; Smith,D.K.; Chen,H.; Webster,R.G.; Webby,R.J.; Peiris,M.; Guan,Y.; Cheung,C. L.
EPI363854	M	China	2006-Sep-01	A/duck/Fujian/9062/2006		Other Database Import	Huang,K.; Zhu,H.; Fan,X.; Wang,J.; Cheung,C.L.; Duan,L.; Hong,W.; Liu,Y.; Li,L.; Smith,D.K.; Chen,H.; Webster,R.G.; Webby,R.J.; Peiris,M.; Guan,Y.; Cheung,C. L.
EPI365014	M	China	2007-Dec-01	A/duck/Fujian/7844/2007		Other Database Import	Huang,K.; Zhu,H.; Fan,X.; Wang,J.; Cheung,C.L.; Duan,L.; Hong,W.; Liu,Y.; Li,L.; Smith,D.K.; Chen,H.; Webster,R.G.; Webby,R.J.; Peiris,M.; Guan,Y.; Cheung,C. L.
EPI365022	M	China	2007-Dec-01	A/duck/Fujian/8349/2007		Other Database Import	Huang,K.; Zhu,H.; Fan,X.; Wang,J.; Cheung,C.L.; Duan,L.; Hong,W.; Liu,Y.; Li,L.; Smith,D.K.; Chen,H.; Webster,R.G.; Webby,R.J.; Peiris,M.; Guan,Y.; Cheung,C. L.
EPI180304	M	Israel	2007-Dec-02	A/chicken/Israel/951/2007		Other Database Import
EPI181467	M	Indonesia	2007	A/chicken/East-Java/UT6044/2007		Other Database Import
EPI164577	M	Lao,-People's-Democratic-Republic	2007	A/chicken/Laos/P0171/2007		Other Database Import
EPI286271	M	Vietnam	2007	A/duck/Soc-Trang/07-25/2007		Other Database Import	Kim,L.M.; Scott,M.A.; Suarez,D.L.; Spackman,E.; Swayne,D.E.; Afonso,C.L.
EPI620826	M	Vietnam	2007	A/duck/Vietnam-Hau-Giang/NCVD-12/2007		Other Database Import	Pantin Jackwood,M.J.; Spackman,E.; Suarez,D.L.; Wasilenko,J.; Sarmento,L.; Shepherd,E.; Smith,D.; Lee,S.; Lone,N.A.
EPI350627	M	Vietnam	2007	A/duck/Vietnam/NCVD-102/2007	National Centre of Veterinary Diagnostics	Centers for Disease Control and Prevention	Davis,Todd; Rivailler,Pierre; Nguyen,Tung
EPI350669	M	Vietnam	2007	A/duck/Vietnam/NCVD-118/2007	National Centre of Veterinary Diagnostics	Centers for Disease Control and Prevention	Davis,Todd; Rivailler,Pierre; Nguyen,Tung
EPI221602	M	Vietnam	2007	A/Muscovy-duck/Ca-Mau/07-04/2007		Other Database Import	Kim,L.M.; Scott,M.A.; Suarez,D.L.; Spackman,E.; Swayne,D.E.; Afonso,C.L.
EPI568682	M	China	2007-Jan-11	A/chicken/Jiangsu/01/2007		Other Database Import	Zhao,M.; Gu,X.; Chen,H.; Liu,Q.; Zhong,L.; Huang,J.; Gu,M.; Liu,X.
EPI364038	M	China	2007-Jul-01	A/duck/Shantou/1240/2007		Other Database Import	Huang,K.; Zhu,H.; Fan,X.; Wang,J.; Cheung,C.L.; Duan,L.; Hong,W.; Liu,Y.; Li,L.; Smith,D.K.; Chen,H.; Webster,R.G.; Webby,R.J.; Peiris,M.; Guan,Y.; Cheung,C. L.
EPI365116	M	China	2007-Jun-01	A/duck/Fujian/1879/2007		Other Database Import	Huang,K.; Zhu,H.; Fan,X.; Wang,J.; Cheung,C.L.; Duan,L.; Hong,W.; Liu,Y.; Li,L.; Smith,D.K.; Chen,H.; Webster,R.G.; Webby,R.J.; Peiris,M.; Guan,Y.; Cheung,C. L.
EPI364987	M	China	2007-Nov-01	A/duck/Fujian/6841/2007		Other Database Import	Huang,K.; Zhu,H.; Fan,X.; Wang,J.; Cheung,C.L.; Duan,L.; Hong,W.; Liu,Y.; Li,L.; Smith,D.K.; Chen,H.; Webster,R.G.; Webby,R.J.; Peiris,M.; Guan,Y.; Cheung,C. L.
EPI610328	M	China	2007-Nov-20	A/chicken/Guangxi/LF/2007		Other Database Import	Peng,Y.; Xie,Z.; Liu,J.; Pang,Y.; Xie,L.; Luo,S.; Fan,Q.
EPI364941	M	China	2007-Sep-01	A/duck/Fujian/4676/2007		Other Database Import	Huang,K.; Zhu,H.; Fan,X.; Wang,J.; Cheung,C.L.; Duan,L.; Hong,W.; Liu,Y.; Li,L.; Smith,D.K.; Chen,H.; Webster,R.G.; Webby,R.J.; Peiris,M.; Guan,Y.; Cheung,C. L.
EPI560124	M	China	2008-Apr-01	A/chicken/Anhui/1/2008		Other Database Import	Zhu,Y.
EPI350662	M	Vietnam	2008-Dec-01	A/duck/Vietnam/NCVD-140/2008	National Centre of Veterinary Diagnostics	Centers for Disease Control and Prevention	Davis,Todd; Rivailler,Pierre; Nguyen,Tung
EPI350746	M	Vietnam	2008-Dec-01	A/duck/Vietnam/NCVD-160/2008	National Centre of Veterinary Diagnostics	Centers for Disease Control and Prevention	Davis,Todd; Rivailler,Pierre; Nguyen,Tung
EPI610276	M	China	2008-Dec-12	A/chicken/Guangxi/DX/2008		Other Database Import	Peng,Y.; Xie,Z.; Liu,J.; Pang,Y.; Xie,L.; Luo,S.; Fan,Q.
EPI469956	M	China	2008	A/chicken/Hong-Kong/NT155/2008		Other Database Import	Lam,T.T.Y.; Wang,J.; Shen,Y.; Zhou,B.; Duan,L.; Cheung,C.L.; Ma,C.; Lycett,S.J.; Leung,C.Y.H.; Chen,X.; Li,L.; Hong,W.; Chai,Y.; Zhou,L.; Liang,H.; Ou,Z.; Liu,Y.; Farooqui,A.; Kelvin,D.J.; Poon,L.L.M.; Smith,D.K.; Pybus,O.G.; Leung,G.M.; Shu,Y.; Webster,R.G.; Webby,R.J.; Peiris,J.S.M.; Rambaut,A.; Zhu,H.; Guan,Y.
EPI349857	M	Vietnam	2008	A/chicken/Vietnam/NCVD-033/2008	National Centre of Veterinary Diagnostics	Centers for Disease Control and Prevention	Davis,Todd; Rivailler,Pierre; Nguyen,Tung
EPI350515	M	Vietnam	2008	A/duck/Vietnam/NCVD-009/2008	National Centre of Veterinary Diagnostics	Centers for Disease Control and Prevention	Davis,Todd; Rivailler,Pierre; Nguyen,Tung
EPI177797	M	Pakistan	2008-Jan-09	A/chicken/Pakistan/UDL-01/2008		Other Database Import
EPI349843	M	Vietnam	2008-May-01	A/chicken/Vietnam/NCVD-03/2008	National Centre of Veterinary Diagnostics	Centers for Disease Control and Prevention	Davis,Todd; Rivailler,Pierre; Nguyen,Tung
EPI299283	M	Japan	2008-Oct-08	A/avian/Japan/8KI0135/2008		Other Database Import	The NIAID Influenza Genome Sequencing Consortium
EPI1007367	M	China	2008-Oct-09	A/duck/Hubei/S4170/2008		Other Database Import	Wang,G.; Deng,G.; Shi,J.; Luo,W.; Zhang,G.; Zhang,Q.; Liu,L.; Jiang,Y.; Li,C.; Sriwilaijaroen,N.; Hiramatsu,H.; Suzuki,Y.; Kawaoka,Y.; Chen,H.
EPI540306	M	Bangladesh	2009-Dec-23	A/duck/Bangladesh/1574/2009	Institute of Epidemiology Disease Control and Research (IEDCR) & Bangladesh National Influenza Centre (NIC)	Centers for Disease Control and Prevention	Gerloff, Nancy; Simpson, Natosha; Davis, C. Todd
EPI350153	M	Vietnam	2009	A/chicken/Vietnam/NCVD-390/2009	National Centre of Veterinary Diagnostics	Centers for Disease Control and Prevention	Davis,Todd; Rivailler,Pierre; Nguyen,Tung
EPI469849	M	China	2009	A/duck/Jiangxi/8032/2009		Other Database Import	Lam,T.T.Y.; Wang,J.; Shen,Y.; Zhou,B.; Duan,L.; Cheung,C.L.; Ma,C.; Lycett,S.J.; Leung,C.Y.H.; Chen,X.; Li,L.; Hong,W.; Chai,Y.; Zhou,L.; Liang,H.; Ou,Z.; Liu,Y.; Farooqui,A.; Kelvin,D.J.; Poon,L.L.M.; Smith,D.K.; Pybus,O.G.; Leung,G.M.; Shu,Y.; Webster,R.G.; Webby,R.J.; Peiris,J.S.M.; Rambaut,A.; Zhu,H.; Guan,Y.
EPI350809	M	Vietnam	2009	A/duck/Vietnam/NCVD-364/2009	National Centre of Veterinary Diagnostics	Centers for Disease Control and Prevention	Davis,Todd; Rivailler,Pierre; Nguyen,Tung
EPI350816	M	Vietnam	2009	A/duck/Vietnam/NCVD-365/2009	National Centre of Veterinary Diagnostics	Centers for Disease Control and Prevention	Davis,Todd; Rivailler,Pierre; Nguyen,Tung
EPI350858	M	Vietnam	2009	A/duck/Vietnam/NCVD-368/2009	National Centre of Veterinary Diagnostics	Centers for Disease Control and Prevention	Davis,Todd; Rivailler,Pierre; Nguyen,Tung
EPI350872	M	Vietnam	2009	A/duck/Vietnam/NCVD-376/2009	National Centre of Veterinary Diagnostics	Centers for Disease Control and Prevention	Davis,Todd; Rivailler,Pierre; Nguyen,Tung
EPI351531	M	Vietnam	2009	A/muscovy-duck/Vietnam/NCVD-384/2009	National Centre of Veterinary Diagnostics	Centers for Disease Control and Prevention	Davis,Todd; Rivailler,Pierre; Nguyen,Tung
EPI345718	M	China	2009-Jun-01	A/duck/Eastern-China/10/2009		Other Database Import	Zhao,G.; Liu,X.
EPI500969	M	China	2009-Mar-05	A/Duck/Guangdong/S1663/2009	Harbin Veterinary Research Institute (CAAS)	Harbin Veterinary Research Institute (CAAS)	Wang, G.J.; Deng,G.H.; Shi, J.Z.; Luo, W.Y.; Zhang, G.Q.; Zhang, Q.Y.; Liu, L.L.; Jiang, Y.P.; Li, C.J.; Sriwilaijaroen, N.; Hiramatsu, H.; Suzuki, Y.; Kawaoka, Y.; Chen, H.L.
EPI471866	M	China	2009-Nov-14	A/duck/Guangxi/GXd-4/2009		Other Database Import	Xie,Z.; Zhou,C.; Peng,Y.; Liu,J.; Pang,Y.; Deng,X.; Xie,L.; Fan,Q.
EPI314015	M	China	2009-Sep-10	A/duck/Tibet/S2/2009		Other Database Import	Suolang,S.; Jin,M.
EPI350473	M	Vietnam	2010-Apr-01	A/chicken/Vietnam/NCVD-412/2010	National Centre of Veterinary Diagnostics	Centers for Disease Control and Prevention	Davis,Todd; Rivailler,Pierre; Nguyen,Tung
EPI1035782	M	China	2010-Apr-08	A/duck/Guangxi/058/2010		Other Database Import	Li,M.; Xie,Z.X.; Xie,L.J.; Deng,X.W.; Xie,Q.Z.; Liu,J.B.; Fan,Q.; Pang,Y.S.; Luo,S.S.
EPI618034	M	Georgia	2010-Apr-28	A/domestic-duck/Republic-of-Georgia/2/2010		Other Database Import	Wentworth,D.E.; Halpin,R.A.; Lin,X.; Simenauer,A.; Akopov,A.; Mohan,M.; Fedorova,N.; Tsitrin,T.; Puri,V.; Stockwell,T.; Amedeo,P.; Bishop,B.; Gupta,N.; Hoover,J.; Katzel,D.; Schobel,S.; Shrivastava,S.; Thovarai,V.; Bao,Y.; Sanders,R.; Zhdanov,S.; Kiryutin,B.; Lipman,D.J.; Tatusova,T.; Fouchier,R.A.M.
EPI501041	M	China	2010-Dec-10	A/Duck/Guangxi/S4111/2010	Harbin Veterinary Research Institute (CAAS)	Harbin Veterinary Research Institute (CAAS)	Wang, G.J.; Deng,G.H.; Shi, J.Z.; Luo, W.Y.; Zhang, G.Q.; Zhang, Q.Y.; Liu, L.L.; Jiang, Y.P.; Li, C.J.; Sriwilaijaroen, N.; Hiramatsu, H.; Suzuki, Y.; Kawaoka, Y.; Chen, H.L.
EPI501097	M	China	2010-Dec-10	A/Duck/Hunan/S4273/2010	Harbin Veterinary Research Institute (CAAS)	Harbin Veterinary Research Institute (CAAS)	Wang, G.J.; Deng,G.H.; Shi, J.Z.; Luo, W.Y.; Zhang, G.Q.; Zhang, Q.Y.; Liu, L.L.; Jiang, Y.P.; Li, C.J.; Sriwilaijaroen, N.; Hiramatsu, H.; Suzuki, Y.; Kawaoka, Y.; Chen, H.L.
EPI350167	M	Vietnam	2010-Feb-01	A/chicken/Vietnam/NCVD-395/2010	National Centre of Veterinary Diagnostics	Centers for Disease Control and Prevention	Davis,Todd; Rivailler,Pierre; Nguyen,Tung
EPI383168	M	China	2010-Feb-10	A/chicken/Jiangsu/k0402/2010		Other Database Import	Hu,J.; Zhao,K.; Liu,X.; Wang,X.; Chen,Z.
EPI469901	M	China	2010	A/duck/Fujian/6390/2010		Other Database Import	Lam,T.T.Y.; Wang,J.; Shen,Y.; Zhou,B.; Duan,L.; Cheung,C.L.; Ma,C.; Lycett,S.J.; Leung,C.Y.H.; Chen,X.; Li,L.; Hong,W.; Chai,Y.; Zhou,L.; Liang,H.; Ou,Z.; Liu,Y.; Farooqui,A.; Kelvin,D.J.; Poon,L.L.M.; Smith,D.K.; Pybus,O.G.; Leung,G.M.; Shu,Y.; Webster,R.G.; Webby,R.J.; Peiris,J.S.M.; Rambaut,A.; Zhu,H.; Guan,Y.
EPI448074	M	Bangladesh	2010-Jan-04	A/chicken/Bangladesh/1012/2010	Institute of Epidemiology Disease Control and Research (IEDCR) & Bangladesh National Influenza Centre (NIC)	Centers for Disease Control and Prevention	Gerloff, Nancy; Simpson, Natosha; Poh, Mee;Davis, Todd
EPI442012	M	China	2010-Jan-27	A/goose/Guangdong/k0103/2010		Other Database Import	Zhao,K.; Gu,M.; Zhong,L.; Duan,Z.; Zhang,Y.; Zhu,Y.; Zhao,G.; Zhao,M.; Chen,Z.; Hu,S.; Liu,W.; Liu,X.; Peng,D.
EPI341513	M	Cambodia	2010-Jan-28	A/chicken/Cambodia/TKCMB5T/2010		Other Database Import	Buchy,P.; Mardy,S.; San,S.
EPI504038	M	Korea,-Republic-of	2010-Mar-01	A/wild-duck/SH38-64/2010		Other Database Import	Lee,K. J.; Choi,J. G.; Kang,H. M.; Song,B. M.; Lee,E. K.; Lee,H. S.; Lee,Y. J.
EPI500857	M	China	2010-Mar-03	A/Chicken/Guangdong/S1312/2010	Harbin Veterinary Research Institute (CAAS)	Harbin Veterinary Research Institute (CAAS)	Wang, G.J.; Deng,G.H.; Shi, J.Z.; Luo, W.Y.; Zhang, G.Q.; Zhang, Q.Y.; Liu, L.L.; Jiang, Y.P.; Li, C.J.; Sriwilaijaroen, N.; Hiramatsu, H.; Suzuki, Y.; Kawaoka, Y.; Chen, H.L.
EPI1007167	M	China	2010-Mar-05	A/chicken/Guangdong/S1453/2010		Other Database Import	Wang,G.; Deng,G.; Shi,J.; Luo,W.; Zhang,G.; Zhang,Q.; Liu,L.; Jiang,Y.; Li,C.; Sriwilaijaroen,N.; Hiramatsu,H.; Suzuki,Y.; Kawaoka,Y.; Chen,H.
EPI401601	M	China	2010-May-08	A/duck/Guangxi/GXd-5/2010		Other Database Import	Xie,Z.; Xie,L.; Zhou,C.; Liu,J.; Pang,Y.; Deng,X.; Fan,Q.; Peng,Y.
EPI425555	M	Vietnam	2010-Nov-01	A/duck/Vietnam/NCVD-645/2010	National Centre of Veterinary Diagnostics	Centers for Disease Control and Prevention
EPI471874	M	China	2010-Nov-11	A/duck/Guangxi/GXd-6/2010		Other Database Import	Xie,Z.; Zhou,C.; Peng,Y.; Liu,J.; Pang,Y.; Deng,X.; Xie,L.; Fan,Q.
EPI348862	M	Vietnam	2010-Nov-16	A/duck/Vietnam/NCVD-456/2010	National Institute of Hygiene and Epidemiology	Centers for Disease Control and Prevention	Davis,Todd; Rivailler,Pierre; Nguyen,Tung
EPI540354	M	Bangladesh	2010-Oct-27	A/duck/Bangladesh/1766/2010	Institute of Epidemiology Disease Control and Research (IEDCR) & Bangladesh National Influenza Centre (NIC)	Centers for Disease Control and Prevention	Gerloff, Nancy; Simpson, Natosha; Davis, C. Todd
EPI424747	M	Vietnam	2010-Oct-29	A/duck/Vietnam/NCVD-784/2010	National Centre of Veterinary Diagnostics	Centers for Disease Control and Prevention
EPI540531	M	Bangladesh	2011-Apr-03	A/duck/Bangladesh/727/2011	Institute of Epidemiology Disease Control and Research (IEDCR) & Bangladesh National Influenza Centre (NIC)	Centers for Disease Control and Prevention	Gerloff, Nancy; Simpson, Natosha; Davis, C. Todd
EPI424899	M	Vietnam	2011-Aug-04	A/duck/Vietnam/NCVD-935/2011	National Centre of Veterinary Diagnostics	Centers for Disease Control and Prevention
EPI387938	M	Vietnam	2011-Dec-06	A/muscovy-duck/Vietnam/LBM66/2011		Other Database Import	Soda,K.; Hotta,K.; Nagai,Y.; Ito,T.; Mimura,W.
EPI401493	M	Japan	2011-Feb-01	A/chicken/Aichi/2/2011		Other Database Import	Uchida,Y.; Suzuki,Y.; Shirakura,M.; Kawaguchi,A.; Nobusawa,E.; Tanikawa,T.; Hikono,H.; Takemae,N.; Mase,M.; Kanehira,K.; Hayashi,T.; Tagawa,Y.; Tashiro,M.; Saito,T.
EPI401475	M	Japan	2011-Feb-01	A/chicken/Miyazaki/9/2011		Other Database Import	Uchida,Y.; Suzuki,Y.; Shirakura,M.; Kawaguchi,A.; Nobusawa,E.; Tanikawa,T.; Hikono,H.; Takemae,N.; Mase,M.; Kanehira,K.; Hayashi,T.; Tagawa,Y.; Tashiro,M.; Saito,T.
EPI401499	M	Japan	2011-Feb-01	A/chicken/Wakayama/1/2011		Other Database Import	Uchida,Y.; Suzuki,Y.; Shirakura,M.; Kawaguchi,A.; Nobusawa,E.; Tanikawa,T.; Hikono,H.; Takemae,N.; Mase,M.; Kanehira,K.; Hayashi,T.; Tagawa,Y.; Tashiro,M.; Saito,T.
EPI448162	M	Bangladesh	2011-Feb-07	A/crow/Bangladesh/316T/2011	Institute of Epidemiology Disease Control and Research (IEDCR) & Bangladesh National Influenza Centre (NIC)	Centers for Disease Control and Prevention	Gerloff, Nancy; Simpson, Natosha; Poh, Mee;Davis, Todd
EPI618035	M	Georgia	2011-Feb-11	A/mallard/Republic-of-Georgia/12/2011		Other Database Import	Wentworth,D.E.; Halpin,R.A.; Lin,X.; Simenauer,A.; Akopov,A.; Mohan,M.; Fedorova,N.; Tsitrin,T.; Puri,V.; Stockwell,T.; Amedeo,P.; Bishop,B.; Gupta,N.; Hoover,J.; Katzel,D.; Schobel,S.; Shrivastava,S.; Thovarai,V.; Bao,Y.; Sanders,R.; Zhdanov,S.; Kiryutin,B.; Lipman,D.J.; Tatusova,T.; Fouchier,R.A.M.
EPI469878	M	China	2011	A/common-teal/Hong-Kong/MPL1075/2011		Other Database Import	Lam,T.T.Y.; Wang,J.; Shen,Y.; Zhou,B.; Duan,L.; Cheung,C.L.; Ma,C.; Lycett,S.J.; Leung,C.Y.H.; Chen,X.; Li,L.; Hong,W.; Chai,Y.; Zhou,L.; Liang,H.; Ou,Z.; Liu,Y.; Farooqui,A.; Kelvin,D.J.; Poon,L.L.M.; Smith,D.K.; Pybus,O.G.; Leung,G.M.; Shu,Y.; Webster,R.G.; Webby,R.J.; Peiris,J.S.M.; Rambaut,A.; Zhu,H.; Guan,Y.
EPI425291	M	Vietnam	2011	A/duck/Vietnam/NCVD-669/2011	National Centre of Veterinary Diagnostics	Centers for Disease Control and Prevention
EPI448218	M	Bangladesh	2011-Jul-24	A/duck/Bangladesh/4124T/2011	Institute of Epidemiology Disease Control and Research (IEDCR) & Bangladesh National Influenza Centre (NIC)	Centers for Disease Control and Prevention	Gerloff, Nancy; Simpson, Natosha; Poh, Mee;Davis, Todd
EPI340431	M	China	2011-Jun-01	A/duck/Zhejiang/0611-15/2011		Other Database Import	Wu,H.; Wu,N.
EPI425515	M	Vietnam	2011-Jun-15	A/chicken/Vietnam/NCVD-780/2011	National Centre of Veterinary Diagnostics	Centers for Disease Control and Prevention
EPI401557	M	Japan	2011-Mar-01	A/chicken/Chiba/2/2011		Other Database Import	Uchida,Y.; Suzuki,Y.; Shirakura,M.; Kawaguchi,A.; Nobusawa,E.; Tanikawa,T.; Hikono,H.; Takemae,N.; Mase,M.; Kanehira,K.; Hayashi,T.; Tagawa,Y.; Tashiro,M.; Saito,T.
EPI351713	M	China	2011-Mar-01	A/chicken/Zhejiang/329/2011		Other Database Import	Wu,H.; Wu,N.
EPI448098	M	Bangladesh	2011-Mar-20	A/duck/Bangladesh/1849/2011	Institute of Epidemiology Disease Control and Research (IEDCR) & Bangladesh National Influenza Centre (NIC)	Centers for Disease Control and Prevention	Gerloff, Nancy; Simpson, Natosha; Poh, Mee;Davis, Todd
EPI466309	M	China	2011-May-21	A/chicken/Jiangsu/ZJDT/2011	Yangzhou University	Chinese Academy of Sciences	Daxin, P
EPI383212	M	China	2011-Nov-29	A/chicken/Guangdong/C273/2011		Other Database Import	Jiao,P.; Yuan,R.; Wei,L.; Jia,B.; Cao,L.; Song,Y.; Gong,L.; Xu,C.; Ren,T.; Liao,M.
EPI574325	M	Vietnam	2011-Oct-12	A/muscovy-duck/Vietnam/LBM21/2011		Other Database Import	Soda,K.; Hotta,K.; Trang,H.U.; Le,Q.M.; Yamashiro,T.; Ito,T.; Trang,U.H.
EPI469990	M	China	2011-Sep-01	A/chicken/Hong-Kong/YU158/2011		Other Database Import	Lam,T.T.Y.; Wang,J.; Shen,Y.; Zhou,B.; Duan,L.; Cheung,C.L.; Ma,C.; Lycett,S.J.; Leung,C.Y.H.; Chen,X.; Li,L.; Hong,W.; Chai,Y.; Zhou,L.; Liang,H.; Ou,Z.; Liu,Y.; Farooqui,A.; Kelvin,D.J.; Poon,L.L.M.; Smith,D.K.; Pybus,O.G.; Leung,G.M.; Shu,Y.; Webster,R.G.; Webby,R.J.; Peiris,J.S.M.; Rambaut,A.; Zhu,H.; Guan,Y.
EPI703658	M	China	2012-Dec-04	A/goose/Eastern-China/L1204/2012		Other Database Import	Sun,H.; Sun,Y.; Pu,J.; Liu,L.; Li,C.; Xu,G.; Qin,M.; Zhang,Y.; Zhao,H.; Wei,K.; Liu,J.
EPI540498	M	Bangladesh	2012-Dec-15	A/poultry/Bangladesh/91354/2012	Institute of Epidemiology Disease Control and Research (IEDCR) & Bangladesh National Influenza Centre (NIC)	Centers for Disease Control and Prevention	Gerloff, Nancy; Simpson, Natosha; Davis, C. Todd
EPI510863	M	Taiwan	2012-Dec-25	A/chicken/Taiwan/2437/2012		Other Database Import	Lee,C.C.; Zhu,H.; Huang,P.Y.; Peng,L.; Chang,Y.C.; Yip,C.H.; Li,Y.T.; Cheung,C.L.; Compans,R.; Yang,C.; Smith,D.K.; Lam,T.T.; King,C.C.; Guan,Y.; Lam,T.T.Y.
EPI812537	M	Bhutan	2012-Feb-14	A/chicken/Bhutan/259/2012		Other Database Import	Franks,J.S.; Tenzin,S.; Tshering,D.; Rai,P.; Lhamo,K.; Dahal,N.; Dukpa,K.
EPI425387	M	Vietnam	2012-Feb-16	A/duck/Vietnam/NCVD-1253/2012	National Centre of Veterinary Diagnostics	Centers for Disease Control and Prevention
EPI470013	M	China	2012	A/chicken/Hong-Kong/YU150W/2012		Other Database Import	Lam,T.T.Y.; Wang,J.; Shen,Y.; Zhou,B.; Duan,L.; Cheung,C.L.; Ma,C.; Lycett,S.J.; Leung,C.Y.H.; Chen,X.; Li,L.; Hong,W.; Chai,Y.; Zhou,L.; Liang,H.; Ou,Z.; Liu,Y.; Farooqui,A.; Kelvin,D.J.; Poon,L.L.M.; Smith,D.K.; Pybus,O.G.; Leung,G.M.; Shu,Y.; Webster,R.G.; Webby,R.J.; Peiris,J.S.M.; Rambaut,A.; Zhu,H.; Guan,Y.
EPI470015	M	China	2012	A/chicken/Hong-Kong/YU262W/2012		Other Database Import	Lam,T.T.Y.; Wang,J.; Shen,Y.; Zhou,B.; Duan,L.; Cheung,C.L.; Ma,C.; Lycett,S.J.; Leung,C.Y.H.; Chen,X.; Li,L.; Hong,W.; Chai,Y.; Zhou,L.; Liang,H.; Ou,Z.; Liu,Y.; Farooqui,A.; Kelvin,D.J.; Poon,L.L.M.; Smith,D.K.; Pybus,O.G.; Leung,G.M.; Shu,Y.; Webster,R.G.; Webby,R.J.; Peiris,J.S.M.; Rambaut,A.; Zhu,H.; Guan,Y.
EPI585431	M	India	2012-Jan-04	A/chicken/India/01CA06/2012		Other Database Import	Nagarajan,S.; Syed,Z.; Tosh,C.; Murugkar,H.V.; Kumar,M.; Kulkarni,D.D.
EPI568785	M	China	2012-Jul-03	A/chicken/Shanxi/0703/2012		Other Database Import	Pu,J.; Wang,S.; Yin,Y.; Zhang,G.; Carter,R.A.; Wang,J.; Xu,G.; Sun,H.; Wang,M.; Wen,C.; Wei,Y.; Wang,D.; Zhu,B.; Lemmon,G.; Jiao,Y.; Duan,S.; Wang,Q.; Du,Q.; Sun,M.; Bao,J.; Sun,Y.; Zhao,J.; Zhang,H.; Wu,G.; Liu,J.; Webster,R.G.; Lv,N.
EPI461025	M	Vietnam	2012-Jul-28	A/duck/Vietnam/QB1207/2012		Other Database Import	Bui,V.N.; Dao,T.D.; Nguyen,L.T.; Nguyen,T.N.T.; Bui,A.N.; Trinh,D.Q.; Inui,K.; Runstadler,J.; Ogawa,H.; Nguyen,K.V.; Imai,K.; Nguyen,T.T.H.
EPI692547	M	China	2012-Jun-05	A/duck/Jiangxi/S21055/2012		Other Database Import	Liang,L.; Deng,G.; Shi,J.; Wang,S.; Zhang,Q.; Kong,H.; Gu,C.; Guan,Y.; Suzuki,Y.; Li,Y.; Jiang,Y.; Tian,G.; Liu,L.; Li,C.; Chen,H.
EPI466381	M	China	2012-Mar-24	A/chicken/Jiangsu/CZYWP/2012	Yangzhou University	Chinese Academy of Sciences	Daxin, P
EPI440913	M	China	2012-Nov-17	A/chicken/Shaanxi/11/2012		Other Database Import	Ren,J.; Wang,J.
EPI540490	M	Bangladesh	2012-Nov-29	A/avian/Bangladesh/91286/2012	Institute of Epidemiology Disease Control and Research (IEDCR) & Bangladesh National Influenza Centre (NIC)	Centers for Disease Control and Prevention	Gerloff, Nancy; Simpson, Natosha; Davis, C. Todd
EPI533881	M	China	2012-Sep-07	A/duck/Guangxi/125D17/2012		Other Database Import	Wu,A.Q.; Xie,Z.X.; Xie,L.J.; Xie,Q.Z.; Luo,S.S.; Liu,J.B.; Deng,X.W.; Fan,Q.; Pang,Y.S.
EPI532306	M	China	2013-Apr-01	A/chicken/Zhejiang/C481/2013		Other Database Import	Wu,H.; Wu,N.; Guo,C.; Li,L.
EPI649310	M	China	2013-Apr-01	A/duck/Zhejiang/413/2013		Other Database Import	Wu,H.; Peng,X.; Cheng,L.; Lu,X.; Jin,C.; Xie,T.; Yao,H.; Wu,N.
EPI680948	M	China	2013-Apr-08	A/pigeon/Zhejiang/P5/2013		Other Database Import	Wu,H.; Peng,X.; Cheng,L.; Lu,X.; Jin,C.; Xie,T.; Yao,H.; Wu,N.
EPI589596	M	Vietnam	2013-Apr-13	A/muscovy-duck/Quang-Ninh/7c121/2013		Other Database Import	Soda,K.; Hotta,K.; Trang,H.U.; Le,Q.M.; Yamashiro,T.; Ito,T.
EPI457848	M	China	2013-Apr-16	A/chicken/Jiangsu/SC537/2013	Harbin Veterinary Research Institute (CAAS)	Harbin Veterinary Research Institute (CAAS)	Zhang, Q.; Shi, J.; Deng, G.; Guo, J.; Zeng, X.; He, X.; Kong, H.; Gu, C.; Li, X.; Liu, J.; Wang, G.; Chen, Y.; Liu, L.; Liang, L.; Li, Y.; Fan, J.; Wang, J.; Li, W.; Guan, L.; Li, Q.; Yang, H.; Chen, P.; Jiang, L.; Guan, Y.; Xin, X.; Jiang, Y.; Tian, G.; Wang, X.; Qiao, C.; Li, C.; Bu, Z.; Chen, H.
EPI544895	M	China	2013-Apr-25	A/duck/Shandong/Q1/2013		Other Database Import	Li,Q.
EPI544797	M	China	2013-Apr-26	A/duck/Shanghai/SH3/2013		Other Database Import	Yang,D.; Liu,J.; Ju,H.; Ge,F.; Wang,J.; Li,X.; Liu,P.; Zhou,J.
EPI775060	M	Vietnam	2013-Aug-13	A/chicken/DongNai/0182/2013		Other Database Import	Cao,B.V.; Le Ha,T.D.; Mai,V.N.; Dang Trinh,M.A.; Le Phan,K.N.; Vo Tran,N.T.; Hoang,T.
EPI591589	M	China	2013-Aug-25	A/duck/Jiangxi/20189/2013		Other Database Import	Lam,T.Y.; Zhou,B.; Wang,J.; Chai,Y.; Shen,Y.; Chen,X.; Ma,C.; Hong,W.; Chen,Y.; Zhang,Y.; Duan,L.; Chen,P.; Jiang,J.; Li,L.; Poon,L.M.; Webby,R.J.; Smith,D.K.; Leung,G.M.; Peiris,J.M.; Holmes,E.C.; Guan,Y.; Zhu,H.
EPI599752	M	China	2013-Dec-08	A/chicken/Jiangxi/31856/2013		Other Database Import	Ma,C.; Lam,T.T.Y.; Chai,Y.; Wang,J.; Fan,X.; Hong,W.; Zhang,Y.; Li,L.; Liu,Y.; Smith,D.K.; Webby,R.J.; Peiris,J.S.M.; Zhu,H.; Guan,Y.
EPI583427	M	China	2013-Dec-11	A/chicken/Shenzhen/1098/2013		Other Database Import	Lam,T.Y.; Zhou,B.; Wang,J.; Chai,Y.; Shen,Y.; Chen,X.; Ma,C.; Hong,W.; Chen,Y.; Zhang,Y.; Duan,L.; Chen,P.; Jiang,J.; Li,L.; Poon,L.M.; Webby,R.J.; Smith,D.K.; Leung,G.M.; Peiris,J.M.; Holmes,E.C.; Guan,Y.; Zhu,H.
EPI583505	M	China	2013-Dec-12	A/chicken/Shenzhen/1799/2013		Other Database Import	Lam,T.Y.; Zhou,B.; Wang,J.; Chai,Y.; Shen,Y.; Chen,X.; Ma,C.; Hong,W.; Chen,Y.; Zhang,Y.; Duan,L.; Chen,P.; Jiang,J.; Li,L.; Poon,L.M.; Webby,R.J.; Smith,D.K.; Leung,G.M.; Peiris,J.M.; Holmes,E.C.; Guan,Y.; Zhu,H.
EPI602450	M	China	2013-Dec-15	A/duck/Jiangxi/33665/2013		Other Database Import	Ma,C.; Lam,T.T.Y.; Chai,Y.; Wang,J.; Fan,X.; Hong,W.; Zhang,Y.; Li,L.; Liu,Y.; Smith,D.K.; Webby,R.J.; Peiris,J.S.M.; Zhu,H.; Guan,Y.
EPI602384	M	China	2013-Dec-15	A/duck/Jiangxi/33713/2013		Other Database Import	Ma,C.; Lam,T.T.Y.; Chai,Y.; Wang,J.; Fan,X.; Hong,W.; Zhang,Y.; Li,L.; Liu,Y.; Smith,D.K.; Webby,R.J.; Peiris,J.S.M.; Zhu,H.; Guan,Y.
EPI599882	M	China	2013-Dec-15	A/duck/Jiangxi/33779/2013		Other Database Import	Ma,C.; Lam,T.T.Y.; Chai,Y.; Wang,J.; Fan,X.; Hong,W.; Zhang,Y.; Li,L.; Liu,Y.; Smith,D.K.; Webby,R.J.; Peiris,J.S.M.; Zhu,H.; Guan,Y.
EPI600175	M	China	2013-Dec-15	A/migratory-duck/Jiangxi/33195/2013		Other Database Import	Ma,C.; Lam,T.T.Y.; Chai,Y.; Wang,J.; Fan,X.; Hong,W.; Zhang,Y.; Li,L.; Liu,Y.; Smith,D.K.; Webby,R.J.; Peiris,J.S.M.; Zhu,H.; Guan,Y.
EPI583589	M	China	2013-Dec-18	A/chicken/Dongguan/2754/2013		Other Database Import	Lam,T.Y.; Zhou,B.; Wang,J.; Chai,Y.; Shen,Y.; Chen,X.; Ma,C.; Hong,W.; Chen,Y.; Zhang,Y.; Duan,L.; Chen,P.; Jiang,J.; Li,L.; Poon,L.M.; Webby,R.J.; Smith,D.K.; Leung,G.M.; Peiris,J.M.; Holmes,E.C.; Guan,Y.; Zhu,H.
EPI581689	M	China	2013-Dec-18	A/silkie-chicken/Dongguan/3284/2013		Other Database Import	Lam,T.Y.; Zhou,B.; Wang,J.; Chai,Y.; Shen,Y.; Chen,X.; Ma,C.; Hong,W.; Chen,Y.; Zhang,Y.; Duan,L.; Chen,P.; Jiang,J.; Li,L.; Poon,L.M.; Webby,R.J.; Smith,D.K.; Leung,G.M.; Peiris,J.M.; Holmes,E.C.; Guan,Y.; Zhu,H.
EPI583659	M	China	2013-Dec-19	A/chicken/Dongguan/3409/2013		Other Database Import	Lam,T.Y.; Zhou,B.; Wang,J.; Chai,Y.; Shen,Y.; Chen,X.; Ma,C.; Hong,W.; Chen,Y.; Zhang,Y.; Duan,L.; Chen,P.; Jiang,J.; Li,L.; Poon,L.M.; Webby,R.J.; Smith,D.K.; Leung,G.M.; Peiris,J.M.; Holmes,E.C.; Guan,Y.; Zhu,H.
EPI581896	M	China	2013-Dec-19	A/chicken/Dongguan/3935/2013		Other Database Import	Lam,T.Y.; Zhou,B.; Wang,J.; Chai,Y.; Shen,Y.; Chen,X.; Ma,C.; Hong,W.; Chen,Y.; Zhang,Y.; Duan,L.; Chen,P.; Jiang,J.; Li,L.; Poon,L.M.; Webby,R.J.; Smith,D.K.; Leung,G.M.; Peiris,J.M.; Holmes,E.C.; Guan,Y.; Zhu,H.
EPI601859	M	China	2013-Dec-29	A/chicken/Jiangxi/36223/2013		Other Database Import	Ma,C.; Lam,T.T.Y.; Chai,Y.; Wang,J.; Fan,X.; Hong,W.; Zhang,Y.; Li,L.; Liu,Y.; Smith,D.K.; Webby,R.J.; Peiris,J.S.M.; Zhu,H.; Guan,Y.
EPI838123	M	China	2013	A/chicken/Sichuan/SIC8/2013		Other Database Import	Liu,Y.; Lai,H.; Li,L.; Chen,R.
EPI470038	M	China	2013	A/chicken/Wenzhou/640/2013		Other Database Import	Lam,T.T.Y.; Wang,J.; Shen,Y.; Zhou,B.; Duan,L.; Cheung,C.L.; Ma,C.; Lycett,S.J.; Leung,C.Y.H.; Chen,X.; Li,L.; Hong,W.; Chai,Y.; Zhou,L.; Liang,H.; Ou,Z.; Liu,Y.; Farooqui,A.; Kelvin,D.J.; Poon,L.L.M.; Smith,D.K.; Pybus,O.G.; Leung,G.M.; Shu,Y.; Webster,R.G.; Webby,R.J.; Peiris,J.S.M.; Rambaut,A.; Zhu,H.; Guan,Y.
EPI898656	M	Vietnam	2013-Jan-09	A/chicken/Vietnam/NCVD-2693/2013		Other Database Import	Davis,T.; Jang,Y.
EPI510800	M	Taiwan	2013-Jan-10	A/duck/Taiwan/4376/2013		Other Database Import	Lee,C.C.; Zhu,H.; Huang,P.Y.; Peng,L.; Chang,Y.C.; Yip,C.H.; Li,Y.T.; Cheung,C.L.; Compans,R.; Yang,C.; Smith,D.K.; Lam,T.T.; King,C.C.; Guan,Y.; Lam,T.T.Y.
EPI466453	M	China	2013-Jan-23	A/chicken/Jiangsu/ZJ4/2013	Yangzhou University	Chinese Academy of Sciences	Daxin, P
EPI1061204	M	China	2013-Jul-07	A/duck/Zhejiang/7731/2013		Other Database Import	Wu,H.; Lu,R.; Peng,X.; Liu,F.; Cheng,L.; Wu,N.
EPI598945	M	China	2013-Jul-10	A/duck/Wuxi/2/2013		Other Database Import	Ma,M.J.; Yang,X.X.; Qian,Y.H.; Zhao,S.Y.; Hua,S.; Wang,T.C.; Chen,S.H.; Ma,G.Y.; Sang,X.Y.; Liu,L.N.; Wu,A.P.; Jiang,T.J.; Gao,Y.W.; Gray,G.C.; Zhao,T.; Ling,X.; Wang,J.L.; Lu,B.; Qian,J.; Cao,W.C.; Ma,M. J.; Yang,X. X.; Cao,W. C.
EPI1061207	M	China	2013-Jul-17	A/duck/Zhejiang/71731/2013		Other Database Import	Wu,H.; Lu,R.; Peng,X.; Liu,F.; Cheng,L.; Wu,N.
EPI1061208	M	China	2013-Jul-17	A/duck/Zhejiang/71737/2013		Other Database Import	Wu,H.; Lu,R.; Peng,X.; Liu,F.; Cheng,L.; Wu,N.
EPI600057	M	China	2013-Jul-21	A/chicken/Jiangxi/17403/2013		Other Database Import	Ma,C.; Lam,T.T.Y.; Chai,Y.; Wang,J.; Fan,X.; Hong,W.; Zhang,Y.; Li,L.; Liu,Y.; Smith,D.K.; Webby,R.J.; Peiris,J.S.M.; Zhu,H.; Guan,Y.
EPI471176	M	Vietnam	2013-Jun-05	A/muscovy-duck/Vietnam/LBM436/2013		Other Database Import	Nakamura,Y.; Soda,K.; Hotta,K.; Lee,M.Q.; Ito,T.
EPI568614	M	China	2013-Mar-07	A/chicken/Shandong/qd0307/2013		Other Database Import	Pu,J.; Wang,S.; Yin,Y.; Zhang,G.; Carter,R.A.; Wang,J.; Xu,G.; Sun,H.; Wang,M.; Wen,C.; Wei,Y.; Wang,D.; Zhu,B.; Lemmon,G.; Jiao,Y.; Duan,S.; Wang,Q.; Du,Q.; Sun,M.; Bao,J.; Sun,Y.; Zhao,J.; Zhang,H.; Wu,G.; Liu,J.; Webster,R.G.; Lv,N.
EPI530991	M	China	2013-Nov-14	A/duck/Zhejiang/W24/2013		Other Database Import	Wu,H.; Peng,X.; Xu,L.; Jin,C.; Cheng,L.; Lu,X.; Xie,T.; Yao,H.; Wu,N.
EPI680972	M	China	2013-Oct-16	A/chicken/Zhejiang/C46/2013		Other Database Import	Wu,H.; Peng,X.; Cheng,L.; Lu,X.; Jin,C.; Xie,T.; Yao,H.; Wu,N.
EPI534869	M	China	2013-Oct-16	A/duck/Zhejiang/D16/2013		Other Database Import	Wu,H.; Wu,N.; Peng,X.; Jin,C.; Lu,X.; Cheng,L.; Yao,H.; Li,L.
EPI596654	M	China	2013-Oct-20	A/chicken/Shaoxing/2414/2013		Other Database Import	Lam,T.Y.; Zhou,B.; Wang,J.; Chai,Y.; Shen,Y.; Chen,X.; Ma,C.; Hong,W.; Chen,Y.; Zhang,Y.; Duan,L.; Chen,P.; Jiang,J.; Li,L.; Poon,L.M.; Webby,R.J.; Smith,D.K.; Leung,G.M.; Peiris,J.M.; Holmes,E.C.; Guan,Y.; Zhu,H.
EPI596715	M	China	2013-Oct-23	A/chicken/Wenzhou/3330/2013		Other Database Import	Lam,T.Y.; Zhou,B.; Wang,J.; Chai,Y.; Shen,Y.; Chen,X.; Ma,C.; Hong,W.; Chen,Y.; Zhang,Y.; Duan,L.; Chen,P.; Jiang,J.; Li,L.; Poon,L.M.; Webby,R.J.; Smith,D.K.; Leung,G.M.; Peiris,J.M.; Holmes,E.C.; Guan,Y.; Zhu,H.
EPI582357	M	China	2013-Oct-24	A/chicken/Huzhou/3791/2013		Other Database Import	Lam,T.Y.; Zhou,B.; Wang,J.; Chai,Y.; Shen,Y.; Chen,X.; Ma,C.; Hong,W.; Chen,Y.; Zhang,Y.; Duan,L.; Chen,P.; Jiang,J.; Li,L.; Poon,L.M.; Webby,R.J.; Smith,D.K.; Leung,G.M.; Peiris,J.M.; Holmes,E.C.; Guan,Y.; Zhu,H.
EPI582986	M	China	2013-Oct-24	A/chicken/Huzhou/4076/2013		Other Database Import	Lam,T.Y.; Zhou,B.; Wang,J.; Chai,Y.; Shen,Y.; Chen,X.; Ma,C.; Hong,W.; Chen,Y.; Zhang,Y.; Duan,L.; Chen,P.; Jiang,J.; Li,L.; Poon,L.M.; Webby,R.J.; Smith,D.K.; Leung,G.M.; Peiris,J.M.; Holmes,E.C.; Guan,Y.; Zhu,H.
EPI592020	M	China	2013-Oct-29	A/chicken/Shaoxing/5493/2013		Other Database Import	Lam,T.Y.; Zhou,B.; Wang,J.; Chai,Y.; Shen,Y.; Chen,X.; Ma,C.; Hong,W.; Chen,Y.; Zhang,Y.; Duan,L.; Chen,P.; Jiang,J.; Li,L.; Poon,L.M.; Webby,R.J.; Smith,D.K.; Leung,G.M.; Peiris,J.M.; Holmes,E.C.; Guan,Y.; Zhu,H.
EPI592494	M	China	2014-Apr-06	A/chicken/Jiangxi/13515/2014		Other Database Import	Lam,T.Y.; Zhou,B.; Wang,J.; Chai,Y.; Shen,Y.; Chen,X.; Ma,C.; Hong,W.; Chen,Y.; Zhang,Y.; Duan,L.; Chen,P.; Jiang,J.; Li,L.; Poon,L.M.; Webby,R.J.; Smith,D.K.; Leung,G.M.; Peiris,J.M.; Holmes,E.C.; Guan,Y.; Zhu,H.
EPI592580	M	China	2014-Apr-06	A/chicken/Jiangxi/13543/2014		Other Database Import	Lam,T.Y.; Zhou,B.; Wang,J.; Chai,Y.; Shen,Y.; Chen,X.; Ma,C.; Hong,W.; Chen,Y.; Zhang,Y.; Duan,L.; Chen,P.; Jiang,J.; Li,L.; Poon,L.M.; Webby,R.J.; Smith,D.K.; Leung,G.M.; Peiris,J.M.; Holmes,E.C.; Guan,Y.; Zhu,H.
EPI1036029	M	China	2014-Apr-14	A/pigeon/Guangxi/164/2014		Other Database Import	Li,M.; Xie,Z.X.; Xie,L.J.; Deng,X.W.; Xie,Q.Z.; Liu,J.B.; Fan,Q.; Pang,Y.S.; Luo,S.S.
EPI593233	M	China	2014-Apr-16	A/chicken/Shantou/2556/2014		Other Database Import	Lam,T.Y.; Zhou,B.; Wang,J.; Chai,Y.; Shen,Y.; Chen,X.; Ma,C.; Hong,W.; Chen,Y.; Zhang,Y.; Duan,L.; Chen,P.; Jiang,J.; Li,L.; Poon,L.M.; Webby,R.J.; Smith,D.K.; Leung,G.M.; Peiris,J.M.; Holmes,E.C.; Guan,Y.; Zhu,H.
EPI593240	M	China	2014-Apr-16	A/chicken/Shantou/2562/2014		Other Database Import	Lam,T.Y.; Zhou,B.; Wang,J.; Chai,Y.; Shen,Y.; Chen,X.; Ma,C.; Hong,W.; Chen,Y.; Zhang,Y.; Duan,L.; Chen,P.; Jiang,J.; Li,L.; Poon,L.M.; Webby,R.J.; Smith,D.K.; Leung,G.M.; Peiris,J.M.; Holmes,E.C.; Guan,Y.; Zhu,H.
EPI592648	M	China	2014-Apr-20	A/chicken/Jiangxi/14479/2014		Other Database Import	Lam,T.Y.; Zhou,B.; Wang,J.; Chai,Y.; Shen,Y.; Chen,X.; Ma,C.; Hong,W.; Chen,Y.; Zhang,Y.; Duan,L.; Chen,P.; Jiang,J.; Li,L.; Poon,L.M.; Webby,R.J.; Smith,D.K.; Leung,G.M.; Peiris,J.M.; Holmes,E.C.; Guan,Y.; Zhu,H.
EPI682965	M	China	2014-Dec-01	A/turtledove/Wuhan/WHBJ12/2014		Other Database Import	Chen,L. J.; Lin,X. D.; Guo,W. P.; Tian,J. H.; Zhang,Y. Z.
EPI969338	M	Korea,-Republic-of	2014-Dec-02	A/wild-bird/Korea/SK14/2014		Other Database Import	Koo,B. S.; Yoon,S. W.
EPI845965	M	Japan	2014-Dec-19	A/mandarin-duck/Gifu/2112D001/2014		Other Database Import	Usui,T.; Soda,K.; Tomioka,Y.; Okamura,M.; Ishihara,T.; Yano,M.; Yabuta,T.; Takakuwa,H.; Otsuki,K.; Ito,H.; Ito,T.; Yamaguchi,T.
EPI895333	M	China	2014-Dec-22	A/Anser-fabalis/China/Anhui/L180/2014		Other Database Import	Ye,G.; Liang,C.H.; Ping,H.Y.; Hua,D.G.; Cheng,Y.Q.
EPI895349	M	China	2014-Dec-22	A/Anser-fabalis/China/Anhui/L256/2014		Other Database Import	Ye,G.; Liang,C.H.; Ping,H.Y.; Hua,D.G.; Cheng,Y.Q.
EPI561677	M	Korea,-Republic-of	2014-Feb-01	A/bean-goose/Korea/H328/2014		Other Database Import	Jeong,J.; Kang,H.M.; Lee,E.K.; Song,B.M.; Kwon,Y.K.; Kim,H.R.; Choi,K.S.; Kim,J.Y.; Lee,H.J.; Moon,O.K.; Jeong,W.; Choi,J.; Baek,J.H.; Joo,Y.S.; Park,Y.H.; Lee,H.S.; Lee,Y.J.; Lee,Y. J.; Kang,H. M.; Lee,E. K.; Song,B. M.; Lee,K. J.; Hong,M. S.
EPI703662	M	China	2014-Feb-15	A/duck/Eastern-China/S0215/2014		Other Database Import	Sun,H.; Sun,Y.; Pu,J.; Liu,L.; Li,C.; Xu,G.; Qin,M.; Zhang,Y.; Zhao,H.; Wei,K.; Liu,J.
EPI594279	M	China	2014-Feb-18	A/chicken/Jiangxi/10953/2014		Other Database Import	Lam,T.Y.; Zhou,B.; Wang,J.; Chai,Y.; Shen,Y.; Chen,X.; Ma,C.; Hong,W.; Chen,Y.; Zhang,Y.; Duan,L.; Chen,P.; Jiang,J.; Li,L.; Poon,L.M.; Webby,R.J.; Smith,D.K.; Leung,G.M.; Peiris,J.M.; Holmes,E.C.; Guan,Y.; Zhu,H.
EPI594328	M	China	2014-Feb-18	A/chicken/Jiangxi/10961/2014		Other Database Import	Lam,T.Y.; Zhou,B.; Wang,J.; Chai,Y.; Shen,Y.; Chen,X.; Ma,C.; Hong,W.; Chen,Y.; Zhang,Y.; Duan,L.; Chen,P.; Jiang,J.; Li,L.; Poon,L.M.; Webby,R.J.; Smith,D.K.; Leung,G.M.; Peiris,J.M.; Holmes,E.C.; Guan,Y.; Zhu,H.
EPI597275	M	China	2014-Feb-20	A/chicken/Dongguan/749/2014		Other Database Import	Lam,T.Y.; Zhou,B.; Wang,J.; Chai,Y.; Shen,Y.; Chen,X.; Ma,C.; Hong,W.; Chen,Y.; Zhang,Y.; Duan,L.; Chen,P.; Jiang,J.; Li,L.; Poon,L.M.; Webby,R.J.; Smith,D.K.; Leung,G.M.; Peiris,J.M.; Holmes,E.C.; Guan,Y.; Zhu,H.
EPI597327	M	China	2014-Feb-20	A/chicken/Dongguan/836/2014		Other Database Import	Lam,T.Y.; Zhou,B.; Wang,J.; Chai,Y.; Shen,Y.; Chen,X.; Ma,C.; Hong,W.; Chen,Y.; Zhang,Y.; Duan,L.; Chen,P.; Jiang,J.; Li,L.; Poon,L.M.; Webby,R.J.; Smith,D.K.; Leung,G.M.; Peiris,J.M.; Holmes,E.C.; Guan,Y.; Zhu,H.
EPI596857	M	China	2014-Feb-20	A/chicken/Dongguan/856/2014		Other Database Import	Lam,T.Y.; Zhou,B.; Wang,J.; Chai,Y.; Shen,Y.; Chen,X.; Ma,C.; Hong,W.; Chen,Y.; Zhang,Y.; Duan,L.; Chen,P.; Jiang,J.; Li,L.; Poon,L.M.; Webby,R.J.; Smith,D.K.; Leung,G.M.; Peiris,J.M.; Holmes,E.C.; Guan,Y.; Zhu,H.
EPI528349	M	China	2014-Feb-20	A/Chicken/Jilin/13199/2014	WHO Chinese National Influenza Center	WHO Chinese National Influenza Center	Wang,Dayan;Gao,Rongbao;Yang,Lei;Zhou,Shumei;Li,Xiyan;Zhou,Jianfang;Zhu,Wenfei;Guo,Junfeng;Li,Xiaodan;Dong,Jie;Huang,Weijuan;Zhang,Ye;Dong,Libo;Zhao,Xiang;Lu,Jian;Lan,Yu;Shu,Yuelong
EPI898451	M	Vietnam	2014-Feb-20	A/chicken/Vietnam/NCVD14-A461/2014		Other Database Import	Davis,T.; Jang,Y.
EPI597579	M	China	2014-Feb-21	A/chicken/Dongguan/1415/2014		Other Database Import	Lam,T.Y.; Zhou,B.; Wang,J.; Chai,Y.; Shen,Y.; Chen,X.; Ma,C.; Hong,W.; Chen,Y.; Zhang,Y.; Duan,L.; Chen,P.; Jiang,J.; Li,L.; Poon,L.M.; Webby,R.J.; Smith,D.K.; Leung,G.M.; Peiris,J.M.; Holmes,E.C.; Guan,Y.; Zhu,H.
EPI597099	M	China	2014-Feb-21	A/chicken/Dongguan/1523/2014		Other Database Import	Lam,T.Y.; Zhou,B.; Wang,J.; Chai,Y.; Shen,Y.; Chen,X.; Ma,C.; Hong,W.; Chen,Y.; Zhang,Y.; Duan,L.; Chen,P.; Jiang,J.; Li,L.; Poon,L.M.; Webby,R.J.; Smith,D.K.; Leung,G.M.; Peiris,J.M.; Holmes,E.C.; Guan,Y.; Zhu,H.
EPI837639	M	China	2014-Feb-26	A/migratory-waterfowl/Hubei/Chenhu1347/2014		Other Database Import	Bi,Y.; Liu,H.; Xiong,C.; Di,Liu.; Shi,W.; Li,M.; Liu,S.; Chen,J.; Chen,G.; Li,Y.; Yang,G.; Lei,Y.; Xiong,Y.; Lei,F.; Wang,H.; Chen,Q.; Gao,G.F.
EPI601298	M	China	2014-Jan-05	A/chicken/Jiangxi/1244/2014		Other Database Import	Ma,C.; Lam,T.T.Y.; Chai,Y.; Wang,J.; Fan,X.; Hong,W.; Zhang,Y.; Li,L.; Liu,Y.; Smith,D.K.; Webby,R.J.; Peiris,J.S.M.; Zhu,H.; Guan,Y.
EPI601889	M	China	2014-Jan-05	A/chicken/Jiangxi/1271/2014		Other Database Import	Ma,C.; Lam,T.T.Y.; Chai,Y.; Wang,J.; Fan,X.; Hong,W.; Zhang,Y.; Li,L.; Liu,Y.; Smith,D.K.; Webby,R.J.; Peiris,J.S.M.; Zhu,H.; Guan,Y.
EPI652905	M	China	2014-Jan-10	A/chicken/Qingdao/014/2014		Other Database Import	Wang,K.; Zhuang,Q.; Chen,J.
EPI601277	M	China	2014-Jan-12	A/chicken/Jiangxi/3119/2014		Other Database Import	Ma,C.; Lam,T.T.Y.; Chai,Y.; Wang,J.; Fan,X.; Hong,W.; Zhang,Y.; Li,L.; Liu,Y.; Smith,D.K.; Webby,R.J.; Peiris,J.S.M.; Zhu,H.; Guan,Y.
EPI602466	M	China	2014-Jan-12	A/chicken/Jiangxi/3152/2014		Other Database Import	Ma,C.; Lam,T.T.Y.; Chai,Y.; Wang,J.; Fan,X.; Hong,W.; Zhang,Y.; Li,L.; Liu,Y.; Smith,D.K.; Webby,R.J.; Peiris,J.S.M.; Zhu,H.; Guan,Y.
EPI509711	M	Korea,-Republic-of	2014-Jan-17	A/broiler-duck/Korea/Buan2/2014		Other Database Import	Lee,Y. J.; Kang,H. M.; Lee,E. K.; Song,B. M.; Jeong,J.; Kwon,Y. K.; Kim,H. R.; Lee,K. J.; Hong,M. S.; Jang,I.; Choi,K. S.; Kim,J. Y.; Lee,H. J.; Kang,M. S.; Jeong,O. M.; Baek,J. H.; Joo,Y. S.; Park,Y.Ho.; Lee,H. S.; Park,Y.H.
EPI672777	M	China	2014-Jan-20	A/wildfowl/China/472/2014	Institute of Poultry Science, Shandong, Academy of Agricultural Science	South China Agricultural University	Wang, Youling
EPI561545	M	Korea,-Republic-of	2014-Jan-22	A/Baikal-teal/Korea/H68/2014		Other Database Import	Jeong,J.; Kang,H.M.; Lee,E.K.; Song,B.M.; Kwon,Y.K.; Kim,H.R.; Choi,K.S.; Kim,J.Y.; Lee,H.J.; Moon,O.K.; Jeong,W.; Choi,J.; Baek,J.H.; Joo,Y.S.; Park,Y.H.; Lee,H.S.; Lee,Y.J.; Lee,Y. J.; Kang,H. M.; Lee,E. K.; Song,B. M.; Lee,K. J.; Hong,M. S.
EPI561594	M	Korea,-Republic-of	2014-Jan-25	A/breeder-duck/Korea/H128/2014		Other Database Import	Jeong,J.; Kang,H.M.; Lee,E.K.; Song,B.M.; Kwon,Y.K.; Kim,H.R.; Choi,K.S.; Kim,J.Y.; Lee,H.J.; Moon,O.K.; Jeong,W.; Choi,J.; Baek,J.H.; Joo,Y.S.; Park,Y.H.; Lee,H.S.; Lee,Y.J.; Lee,Y. J.; Kang,H. M.; Lee,E. K.; Song,B. M.; Lee,K. J.; Hong,M. S.
EPI561601	M	Korea,-Republic-of	2014-Jan-25	A/broiler-duck/Korea/H133/2014		Other Database Import	Jeong,J.; Kang,H.M.; Lee,E.K.; Song,B.M.; Kwon,Y.K.; Kim,H.R.; Choi,K.S.; Kim,J.Y.; Lee,H.J.; Moon,O.K.; Jeong,W.; Choi,J.; Baek,J.H.; Joo,Y.S.; Park,Y.H.; Lee,H.S.; Lee,Y.J.; Lee,Y. J.; Kang,H. M.; Lee,E. K.; Song,B. M.; Lee,K. J.; Hong,M. S.
EPI647484	M	China	2014-Jul-01	A/chicken/Zhejiang/727031/2014		Other Database Import	Wu,H.; Peng,X.; Cheng,L.; Wu,N.
EPI681157	M	China	2014-Jul-07	A/chicken/Zhejiang/77082/2014		Other Database Import	Wu,H.; Peng,X.; Cheng,L.; Lu,X.; Jin,C.; Xie,T.; Yao,H.; Wu,N.
EPI649295	M	China	2014-Jul-07	A/duck/Zhejiang/77127/2014		Other Database Import	Wu,H.; Peng,X.; Cheng,L.; Lu,X.; Jin,C.; Xie,T.; Yao,H.; Wu,N.
EPI681368	M	China	2014-Jul-07	A/goose/Zhejiang/77167/2014		Other Database Import	Wu,H.; Peng,X.; Cheng,L.; Lu,X.; Jin,C.; Xie,T.; Yao,H.; Wu,N.
EPI681150	M	China	2014-Jul-07	A/pigeon/Zhejiang/77037/2014		Other Database Import	Wu,H.; Peng,X.; Cheng,L.; Lu,X.; Jin,C.; Xie,T.; Yao,H.; Wu,N.
EPI681383	M	China	2014-Jul-27	A/chicken/Zhejiang/727155/2014		Other Database Import	Wu,H.; Peng,X.; Cheng,L.; Lu,X.; Jin,C.; Xie,T.; Yao,H.; Wu,N.
EPI681373	M	China	2014-Jul-27	A/goose/Zhejiang/727092/2014		Other Database Import	Wu,H.; Peng,X.; Cheng,L.; Lu,X.; Jin,C.; Xie,T.; Yao,H.; Wu,N.
EPI681151	M	China	2014-Jul-27	A/pigeon/Zhejiang/727044/2014		Other Database Import	Wu,H.; Peng,X.; Cheng,L.; Lu,X.; Jin,C.; Xie,T.; Yao,H.; Wu,N.
EPI585734	M	China	2014-Jun-01	A/swan-goose/Jilin/JL01/2014		Other Database Import	Yu,Z.; Wang,T.; Gao,X.; Gao,Y.; Xia,X.
EPI593375	M	China	2014-Jun-07	A/chicken/Jiangxi/17989/2014		Other Database Import	Lam,T.Y.; Zhou,B.; Wang,J.; Chai,Y.; Shen,Y.; Chen,X.; Ma,C.; Hong,W.; Chen,Y.; Zhang,Y.; Duan,L.; Chen,P.; Jiang,J.; Li,L.; Poon,L.M.; Webby,R.J.; Smith,D.K.; Leung,G.M.; Peiris,J.M.; Holmes,E.C.; Guan,Y.; Zhu,H.
EPI644477	M	China	2014-Mar-01	A/chicken/Zhejiang/2C66/2014		Other Database Import	Wu,H.; Lu,R.; Wu,X.; Peng,X.; Xu,L.; Cheng,L.; Lu,X.; Jin,C.; Xie,T.; Yao,H.; Wu,N.
EPI592034	M	China	2014-Mar-16	A/chicken/Jiangxi/12210/2014		Other Database Import	Lam,T.Y.; Zhou,B.; Wang,J.; Chai,Y.; Shen,Y.; Chen,X.; Ma,C.; Hong,W.; Chen,Y.; Zhang,Y.; Duan,L.; Chen,P.; Jiang,J.; Li,L.; Poon,L.M.; Webby,R.J.; Smith,D.K.; Leung,G.M.; Peiris,J.M.; Holmes,E.C.; Guan,Y.; Zhu,H.
EPI592048	M	China	2014-Mar-16	A/chicken/Jiangxi/12221/2014		Other Database Import	Lam,T.Y.; Zhou,B.; Wang,J.; Chai,Y.; Shen,Y.; Chen,X.; Ma,C.; Hong,W.; Chen,Y.; Zhang,Y.; Duan,L.; Chen,P.; Jiang,J.; Li,L.; Poon,L.M.; Webby,R.J.; Smith,D.K.; Leung,G.M.; Peiris,J.M.; Holmes,E.C.; Guan,Y.; Zhu,H.
EPI592378	M	China	2014-Mar-16	A/chicken/Jiangxi/12243/2014		Other Database Import	Lam,T.Y.; Zhou,B.; Wang,J.; Chai,Y.; Shen,Y.; Chen,X.; Ma,C.; Hong,W.; Chen,Y.; Zhang,Y.; Duan,L.; Chen,P.; Jiang,J.; Li,L.; Poon,L.M.; Webby,R.J.; Smith,D.K.; Leung,G.M.; Peiris,J.M.; Holmes,E.C.; Guan,Y.; Zhu,H.
EPI600214	M	China	2014-Mar-30	A/chicken/Jiangxi/13202/2014		Other Database Import	Ma,C.; Lam,T.T.Y.; Chai,Y.; Wang,J.; Fan,X.; Hong,W.; Zhang,Y.; Li,L.; Liu,Y.; Smith,D.K.; Webby,R.J.; Peiris,J.S.M.; Zhu,H.; Guan,Y.
EPI602247	M	China	2014-Mar-30	A/chicken/Jiangxi/13217/2014		Other Database Import	Ma,C.; Lam,T.T.Y.; Chai,Y.; Wang,J.; Fan,X.; Hong,W.; Zhang,Y.; Li,L.; Liu,Y.; Smith,D.K.; Webby,R.J.; Peiris,J.S.M.; Zhu,H.; Guan,Y.
EPI592139	M	China	2014-Mar-30	A/chicken/Jiangxi/13230/2014		Other Database Import	Lam,T.Y.; Zhou,B.; Wang,J.; Chai,Y.; Shen,Y.; Chen,X.; Ma,C.; Hong,W.; Chen,Y.; Zhang,Y.; Duan,L.; Chen,P.; Jiang,J.; Li,L.; Poon,L.M.; Webby,R.J.; Smith,D.K.; Leung,G.M.; Peiris,J.M.; Holmes,E.C.; Guan,Y.; Zhu,H.
EPI602275	M	China	2014-Mar-30	A/chicken/Jiangxi/13238/2014		Other Database Import	Ma,C.; Lam,T.T.Y.; Chai,Y.; Wang,J.; Fan,X.; Hong,W.; Zhang,Y.; Li,L.; Liu,Y.; Smith,D.K.; Webby,R.J.; Peiris,J.S.M.; Zhu,H.; Guan,Y.
EPI602216	M	China	2014-Mar-30	A/chicken/Jiangxi/13249/2014		Other Database Import	Ma,C.; Lam,T.T.Y.; Chai,Y.; Wang,J.; Fan,X.; Hong,W.; Zhang,Y.; Li,L.; Liu,Y.; Smith,D.K.; Webby,R.J.; Peiris,J.S.M.; Zhu,H.; Guan,Y.
EPI602163	M	China	2014-Mar-30	A/chicken/Jiangxi/13274/2014		Other Database Import	Ma,C.; Lam,T.T.Y.; Chai,Y.; Wang,J.; Fan,X.; Hong,W.; Zhang,Y.; Li,L.; Liu,Y.; Smith,D.K.; Webby,R.J.; Peiris,J.S.M.; Zhu,H.; Guan,Y.
EPI964966	M	Bangladesh	2014-Nov-16	A/duck/Bangladesh/23858/2014		Other Database Import	Marinova Petkova,A.; Shanmuganatham,K.; Feeroz,M.M.; Jones Engel,L.; Hasan,M.K.; Akhtar,S.; Turner,J.; Walker,D.; Seiler,P.; Franks,J.; McKenzie,P.; Krauss,S.; Webby,R.J.; Webster,R.G.; Hasan,K.; Seiler,J.
EPI1061199	M	China	2014-Nov-20	A/goose/Zhejiang/1120078/2014		Other Database Import	Wu,H.; Lu,R.; Peng,X.; Liu,F.; Cheng,L.; Wu,N.
EPI1061201	M	China	2014-Nov-20	A/goose/Zhejiang/1120084/2014		Other Database Import	Wu,H.; Lu,R.; Peng,X.; Liu,F.; Cheng,L.; Wu,N.
EPI681360	M	China	2014-Nov-20	A/goose/Zhejiang/112071/2014		Other Database Import	Wu,H.; Peng,X.; Cheng,L.; Lu,X.; Jin,C.; Xie,T.; Yao,H.; Wu,N.
EPI580278	M	China	2014-Nov-30	A/Chicken/Guangdong/DG479/2014	South China Agricultural University	South China Agricultural University	Shumin,Xie;Weixin,Jia;Yicun,Lin;Kaixiang,Xing;Xingxing,Ren;Wenbao,Qi;Ming,Liao
EPI736694	M	China	2014-Oct-12	A/duck/Guizhou/013/2014		Other Database Import	Duan,Z.; Chen,J.; Ji,X.; Xu,H.; Ruan,Y.; Zhao,J.
EPI596537	M	Vietnam	2014-Oct-13	A/duck/Vietnam/LBM758/2014		Other Database Import	Soda,K.; Hotta,K.; Trang,H.U.; Le,Q.M.; Yamashiro,T.; Ito,T.
EPI596518	M	Vietnam	2014-Oct-13	A/muscovy-duck/Vietnam/LBM754/2014		Other Database Import	Soda,K.; Hotta,K.; Trang,H.U.; Le,Q.M.; Yamashiro,T.; Ito,T.
EPI839150	M	China	2014-Sep-08	A/Gallinula-chloropus/Guangdong/GZ174/2014		Other Database Import	Kang,Y.; Feng,M.; Ren,T.
EPI681165	M	China	2014-Sep-25	A/chicken/Zhejiang/925134/2014		Other Database Import	Wu,H.; Peng,X.; Cheng,L.; Lu,X.; Jin,C.; Xie,T.; Yao,H.; Wu,N.
EPI681377	M	China	2014-Sep-25	A/goose/Zhejiang/925106/2014		Other Database Import	Wu,H.; Peng,X.; Cheng,L.; Lu,X.; Jin,C.; Xie,T.; Yao,H.; Wu,N.
EPI760216	M	China	2015-Apr-06	A/duck/Hunan/161/2015		Other Database Import	Li,X.; Yang,J.; Liu,B.; Jia,Y.; Guo,J.; Gao,X.; Weng,S.; Yang,M.; Wang,L.; Wang,L.F.; Cui,J.; Chen,H.; Zhu,Q.
EPI1060786	M	Hong-Kong-(SAR)	2015-Apr-30	A/oriental-magpie-robin/HK/6154/2015		Other Database Import	Hui,P.Y.; Chan,L.Y.; Kuok,I.T.; Mok,K.P.; Yang,Z.; Li,R.; Luk,S.M.; Lee,F.; Yen,H.L.; Zhu,H.; Guan,Y.; Nicholls,J.; Peiris,M.; Chan,C.W.
EPI965218	M	Bangladesh	2015-Aug-25	A/quail/Bangladesh/25987/2015		Other Database Import	Barman,S.; Marinova Petkova,A.; Hasan,M.K.; Akhtar,S.; Turner,J.C.; Franks,J.; Walker,D.; Seiler,P.; Friedman,K.; Kercher,L.; Kayali,G.; Jones Engel,L.; McKenzie,P.; Krauss,S.; Webby,R.J.; Feeroz,M.M.; Webster,R.G.
EPI693709	M	Mongolia	2015-Aug-30	A/duck/Mongolia/83/2015		Other Database Import	Matsuno,K.; Okamatsu,M.; Kida,H.; Sakoda,Y.; Matuno,K.; Hatamachi,J.
EPI895152	M	China	2015-Dec-12	A/chicken/Ganzhou/GZ27/2015		Other Database Import	Chen,L.J.; Tian,J.H.; Lin,X.D.; Liao,Y.; Shi,M.; Zhang,Y.Z.
EPI682982	M	China	2015	A/chicken/Wenzhou/RAQL01/2015		Other Database Import	Chen,L. J.; Lin,X. D.; Guo,W. P.; Tian,J. H.; Zhang,Y. Z.
EPI682968	M	China	2015	A/turtledove/Wuhan/HKBJ43/2015		Other Database Import	Chen,L. J.; Lin,X. D.; Guo,W. P.; Tian,J. H.; Zhang,Y. Z.
EPI775084	M	Vietnam	2015-Jan-06	A/duck/CaMau/0237/2015		Other Database Import	Cao,B.V.; Le Ha,T.D.; Mai,V.N.; Dang Trinh,M.A.; Le Phan,K.N.; Vo Tran,N.T.; Hoang,T.
EPI775092	M	Vietnam	2015-Jan-06	A/duck/CaMau/0238/2015		Other Database Import	Cao,B.V.; Le Ha,T.D.; Mai,V.N.; Dang Trinh,M.A.; Le Phan,K.N.; Vo Tran,N.T.; Hoang,T.
EPI590552	M	Taiwan	2015-Jan-15	A/chicken/PT/a158/2015		Other Database Import	Cheng,M. C.; Tan,D. H.; Chen,L. H.; Liu,Y. P.; Lin,Y. J.; Tsai,H. J.; Chang,P. C.
EPI690547	M	Taiwan	2015-Jan-17	A/goose/Taiwan/TNC4/2015		Other Database Import	Huang,P.Y.; Lee,C.D.; Yip,C.H.; Cheung,C.L.; Yu,G.; Lam,T.T.; Smith,D.K.; Zhu,H.; Guan,Y.; Lee,C.C.; Lam,T.Y.
EPI690723	M	Taiwan	2015-Jan-17	A/goose/Taiwan/TNO12/2015		Other Database Import	Huang,P.Y.; Lee,C.D.; Yip,C.H.; Cheung,C.L.; Yu,G.; Lam,T.T.; Smith,D.K.; Zhu,H.; Guan,Y.; Lee,C.C.; Lam,T.Y.
EPI946751	M	Japan	2015-Jul-07	A/chicken/Japan/AQ-HE61/2015		Other Database Import	Shibata,A.; Hiono,T.; Okamatsu,M.; Osaka,H.; Sakoda,Y.
EPI965356	M	Bangladesh	2015-Jul-10	A/duck/Bangladesh/25891/2015		Other Database Import	Barman,S.; Marinova Petkova,A.; Hasan,M.K.; Akhtar,S.; Turner,J.C.; Franks,J.; Walker,D.; Seiler,P.; Friedman,K.; Kercher,L.; Kayali,G.; Jones Engel,L.; McKenzie,P.; Krauss,S.; Webby,R.J.; Feeroz,M.M.; Webster,R.G.
EPI729781	M	China	2015-May-01	A/chicken/Shanghai/06/2015		Other Database Import	Ge,F.
EPI641387	M	China	2015-May-05	A/chicken/Shandong/1167/2015		Other Database Import	Tan,L.; Xu,C.T.; Zhao,X.; Huang,Q.; Huang,Y.; Zhu,F.; Gao,D.; Zhang,L.; Yang,S.; Zhang,X.
EPI753560	M	China	2015-May-14	A/chicken/Zhejiang/514132/2015		Other Database Import	Wu,H.; Lu,R.; Peng,X.; Cheng,L.; Jin,C.; Lu,X.; Xie,T.; Yao,H.; Wu,N.
EPI895151	M	China	2016-Feb-19	A/chicken/Taishun/TS2/2016		Other Database Import	Chen,L.J.; Tian,J.H.; Lin,X.D.; Liao,Y.; Shi,M.; Zhang,Y.Z.

## Sheet: NS
Table S1. GISAID acknowledgements for NS segment.
Isolate ID	Segment	Country	Collection date	Isolate name	Originating Laboratory	Submitting Laboratory	Authors
EPI89460	NS	China	1979	A/duck/Hong-Kong/784/1979		Other Database Import
EPI590177	NS	Hong-Kong-(SAR)	1980	A/duck/Hong-Kong/819/1980		Other Database Import	Kida,H.; Sakoda,Y.; Okamatsu,M.; Matsuno,K.; Masani,K.; Hatamachi,J.
EPI590178	NS	Hong-Kong-(SAR)	1980	A/duck/Hong-Kong/820/1980		Other Database Import	Kida,H.; Sakoda,Y.; Okamatsu,M.; Matsuno,K.; Masani,K.; Hatamachi,J.
EPI5794	NS	China	1996	A/Goose/Guangdong/1/96		Other Database Import
EPI347	NS	Japan	1997	A/parakeet/Chiba/1/97		Other Database Import
EPI81949	NS	China	1999	A/chicken/Guangxi/9/99		Other Database Import
EPI81940	NS	China	2001	A/chicken/Guangdong/56/01		Other Database Import
EPI1489	NS	Japan	2001	A/chicken/Osaka/aq58/2001		Other Database Import
EPI15227	NS	Hong-Kong-(SAR)	2001	A/Duck/Hong-Kong/380.5/2001		Other Database Import	Kim,L.M.; Scott,M.A.; Suarez,D.L.; Spackman,E.; Swayne,D.E.; Afonso,C.L.
EPI268609	NS	China	2001	A/duck/Shantou/1197/2001		Other Database Import	Huang,K.; Bahl,J.; Fan,X.; Vijaykrishna,D.; Cheung,C.; Webby,R.J.; Webster,R.G.; Chen,H.; Smith,G.J.D.; Peiris,M.J.S.; Guan,Y.
EPI235801	NS	China	2002	A/chicken/Jilin/hd/2002		Other Database Import	Liao,X.; Zhang,X.; Wang,J.; Yu,J.; Jin,N.
EPI102333	NS	Taiwan	2002	A/chicken/Taiwan/0222/02		Other Database Import
EPI102357	NS	Taiwan	2002	A/chicken/Taiwan/0408/02		Other Database Import
EPI102336	NS	Taiwan	2002	A/chicken/Taiwan/PF1/02		Other Database Import
EPI102342	NS	Taiwan	2002	A/chicken/Taiwan/PF3/02		Other Database Import
EPI1543	NS	Japan	2002	A/chicken/Yokohama/aq134/2002		Other Database Import
EPI268561	NS	China	2002	A/duck/Shantou/1706/2002		Other Database Import	Huang,K.; Bahl,J.; Fan,X.; Vijaykrishna,D.; Cheung,C.; Webby,R.J.; Webster,R.G.; Chen,H.; Smith,G.J.D.; Peiris,M.J.S.; Guan,Y.
EPI268559	NS	China	2002	A/duck/Shantou/2061/2002		Other Database Import	Huang,K.; Bahl,J.; Fan,X.; Vijaykrishna,D.; Cheung,C.; Webby,R.J.; Webster,R.G.; Chen,H.; Smith,G.J.D.; Peiris,M.J.S.; Guan,Y.
EPI376202	NS	China	2003-Apr-01	A/duck/Fujian/MH/2003		Other Database Import	Fu,G.; Huang,Y.
EPI184115	NS	Pakistan	2003	A/chicken/Karachi/NARC-23/2003		Other Database Import	Abbas,M.A.; Spackman,E.; Ahmed,Z.; Naeem,K.; Siddique,N.; Swayne,D.; Sarmento,L.; Hameed,A.
EPI25035	NS	China	2004	A/chicken/Guangdong/178/04		Other Database Import
EPI25002	NS	China	2004	A/chicken/Guangdong/191/04		Other Database Import
EPI167217	NS	Thailand	2004	A/chicken/Kohn-Kaen/NIAH330/2004		Other Database Import
EPI171049	NS	Vietnam	2004	A/chicken/Vietnam/933/2004		Other Database Import
EPI268641	NS	China	2004	A/duck/Hunan/3748/2004		Other Database Import	Huang,K.; Bahl,J.; Fan,X.; Vijaykrishna,D.; Cheung,C.; Webby,R.J.; Webster,R.G.; Chen,H.; Smith,G.J.D.; Peiris,M.J.S.; Guan,Y.
EPI107189	NS	Thailand	2004	A/open-billed-stork/Nakhonsawan/BBD0104F/2004		Other Database Import
EPI170710	NS	Vietnam	2005-Dec-06	A/duck/Vietnam/203/2005		Other Database Import
EPI170626	NS	Vietnam	2005-Dec-16	A/duck/Vietnam/215/2005		Other Database Import
EPI170619	NS	Vietnam	2005-Dec-18	A/chicken/Vietnam/216/2005		Other Database Import
EPI153696	NS	Israel	2005	A/chicken/Israel/793/2005		Other Database Import
EPI227014	NS	Vietnam	2005	A/chicken/Ninh-Binh/209/2005		Other Database Import	Kim,L.M.; Scott,M.A.; Suarez,D.L.; Spackman,E.; Swayne,D.E.; Afonso,C.L.
EPI275874	NS	China	2005	A/chicken/Sichuan/81/2005		Other Database Import	Li,Y.; Shi,J.; Zhong,G.; Deng,G.; Tian,G.; Ge,J.; Zeng,X.; Song,J.; Zhao,D.; Liu,L.; Jiang,Y.; Guan,Y.; Bu,Z.; Chen,H.
EPI47323	NS	Vietnam	2005	A/chicken/Viet-Nam/10/2005		Other Database Import
EPI47342	NS	Vietnam	2005	A/chicken/Viet-Nam/11/2005		Other Database Import
EPI47304	NS	Vietnam	2005	A/chicken/Viet-Nam/9/2005		Other Database Import
EPI268497	NS	China	2005	A/duck/Fujian/629/2005		Other Database Import	Huang,K.; Bahl,J.; Fan,X.; Vijaykrishna,D.; Cheung,C.; Webby,R.J.; Webster,R.G.; Chen,H.; Smith,G.J.D.; Peiris,M.J.S.; Guan,Y.
EPI268505	NS	China	2005	A/duck/Guangxi/141/2005		Other Database Import	Huang,K.; Bahl,J.; Fan,X.; Vijaykrishna,D.; Cheung,C.; Webby,R.J.; Webster,R.G.; Chen,H.; Smith,G.J.D.; Peiris,M.J.S.; Guan,Y.
EPI268522	NS	China	2005	A/duck/Shantou/2472/2005		Other Database Import	Huang,K.; Bahl,J.; Fan,X.; Vijaykrishna,D.; Cheung,C.; Webby,R.J.; Webster,R.G.; Chen,H.; Smith,G.J.D.; Peiris,M.J.S.; Guan,Y.
EPI111128	NS	Thailand	2005	A/open-billed-stork/Nakhonsawan/BBD2416F/05		Other Database Import
EPI167228	NS	Thailand	2005	A/pigeon/Thailand/VSMU-13-KRI/2005		Other Database Import
EPI363523	NS	China	2006-Feb-01	A/duck/Guizhou/1084/2006		Other Database Import	Huang,K.; Zhu,H.; Fan,X.; Wang,J.; Cheung,C.L.; Duan,L.; Hong,W.; Liu,Y.; Li,L.; Smith,D.K.; Chen,H.; Webster,R.G.; Webby,R.J.; Peiris,M.; Guan,Y.; Cheung,C. L.
EPI122606	NS	China	2006	A/bird/Guangxi/H1/2006		Other Database Import
EPI47133	NS	Afghanistan	2006	A/chicken/Afghanistan/1207/2006		Other Database Import
EPI58571	NS	Afghanistan	2006	A/chicken/Afghanistan/1573-47/2006		Other Database Import
EPI58590	NS	Afghanistan	2006	A/chicken/Afghanistan/1573-65/2006		Other Database Import
EPI60319	NS	Afghanistan	2006	A/chicken/Afghanistan/1573-7/2006		Other Database Import
EPI275834	NS	China	2006	A/chicken/Ningxia/24/2006		Other Database Import	Li,Y.; Shi,J.; Zhong,G.; Deng,G.; Tian,G.; Ge,J.; Zeng,X.; Song,J.; Zhao,D.; Liu,L.; Jiang,Y.; Guan,Y.; Bu,Z.; Chen,H.
EPI408143	NS	Myanmar	2006	A/chicken/Pyigyitagon/204/2006		Other Database Import	Saito,T.; Watanabe,C.; Hayashi,T.; Uchida,Y.; Myint,W.W.; Thein,W.Z.; Takemae,N.; Mase,M.; Okamatsu,M.; Mar,A.; Mon,C.C.; Gawng,L.T.; Sann,K.; Kyi,T.A.; Yamaguchi,S.
EPI368253	NS	Thailand	2006	A/duck/Thailand/TS01/2006		Other Database Import	Songserm,T.; Wiboon ut,S.; Kanchongkittiphon,W.; Na Ek,P.; Thitithanyanont,A.
EPI276082	NS	China	2006	A/wild-duck/Liaoning/8/2006		Other Database Import	Li,Y.; Shi,J.; Zhong,G.; Deng,G.; Tian,G.; Ge,J.; Zeng,X.; Song,J.; Zhao,D.; Liu,L.; Jiang,Y.; Guan,Y.; Bu,Z.; Chen,H.
EPI363643	NS	China	2006-Jul-01	A/duck/Shantou/14167/2006		Other Database Import	Huang,K.; Zhu,H.; Fan,X.; Wang,J.; Cheung,C.L.; Duan,L.; Hong,W.; Liu,Y.; Li,L.; Smith,D.K.; Chen,H.; Webster,R.G.; Webby,R.J.; Peiris,M.; Guan,Y.; Cheung,C. L.
EPI363459	NS	China	2006-Mar-01	A/duck/Guangxi/1074/2006		Other Database Import	Huang,K.; Zhu,H.; Fan,X.; Wang,J.; Cheung,C.L.; Duan,L.; Hong,W.; Liu,Y.; Li,L.; Smith,D.K.; Chen,H.; Webster,R.G.; Webby,R.J.; Peiris,M.; Guan,Y.; Cheung,C. L.
EPI177766	NS	Pakistan	2006-May-02	A/chicken/Pakistan/UDL-01/2006		Other Database Import
EPI365087	NS	China	2006-Nov-01	A/duck/Fujian/10950/2006		Other Database Import	Huang,K.; Zhu,H.; Fan,X.; Wang,J.; Cheung,C.L.; Duan,L.; Hong,W.; Liu,Y.; Li,L.; Smith,D.K.; Chen,H.; Webster,R.G.; Webby,R.J.; Peiris,M.; Guan,Y.; Cheung,C. L.
EPI363855	NS	China	2006-Sep-01	A/duck/Fujian/9062/2006		Other Database Import	Huang,K.; Zhu,H.; Fan,X.; Wang,J.; Cheung,C.L.; Duan,L.; Hong,W.; Liu,Y.; Li,L.; Smith,D.K.; Chen,H.; Webster,R.G.; Webby,R.J.; Peiris,M.; Guan,Y.; Cheung,C. L.
EPI365015	NS	China	2007-Dec-01	A/duck/Fujian/7844/2007		Other Database Import	Huang,K.; Zhu,H.; Fan,X.; Wang,J.; Cheung,C.L.; Duan,L.; Hong,W.; Liu,Y.; Li,L.; Smith,D.K.; Chen,H.; Webster,R.G.; Webby,R.J.; Peiris,M.; Guan,Y.; Cheung,C. L.
EPI365023	NS	China	2007-Dec-01	A/duck/Fujian/8349/2007		Other Database Import	Huang,K.; Zhu,H.; Fan,X.; Wang,J.; Cheung,C.L.; Duan,L.; Hong,W.; Liu,Y.; Li,L.; Smith,D.K.; Chen,H.; Webster,R.G.; Webby,R.J.; Peiris,M.; Guan,Y.; Cheung,C. L.
EPI180290	NS	Israel	2007-Dec-02	A/chicken/Israel/951/2007		Other Database Import
EPI181491	NS	Indonesia	2007	A/chicken/East-Java/UT6044/2007		Other Database Import
EPI164578	NS	Lao,-People's-Democratic-Republic	2007	A/chicken/Laos/P0171/2007		Other Database Import
EPI286055	NS	Vietnam	2007	A/duck/Soc-Trang/07-25/2007		Other Database Import	Kim,L.M.; Scott,M.A.; Suarez,D.L.; Spackman,E.; Swayne,D.E.; Afonso,C.L.
EPI622551	NS	Vietnam	2007	A/duck/Vietnam-Hau-Giang/NCVD-12/2007		Other Database Import	Pantin Jackwood,M.J.; Spackman,E.; Suarez,D.L.; Wasilenko,J.; Sarmento,L.; Shepherd,E.; Smith,D.; Lee,S.; Lone,N.A.
EPI350626	NS	Vietnam	2007	A/duck/Vietnam/NCVD-102/2007	National Centre of Veterinary Diagnostics	Centers for Disease Control and Prevention	Davis,Todd; Rivailler,Pierre; Nguyen,Tung
EPI350668	NS	Vietnam	2007	A/duck/Vietnam/NCVD-118/2007	National Centre of Veterinary Diagnostics	Centers for Disease Control and Prevention	Davis,Todd; Rivailler,Pierre; Nguyen,Tung
EPI221605	NS	Vietnam	2007	A/Muscovy-duck/Ca-Mau/07-04/2007		Other Database Import	Kim,L.M.; Scott,M.A.; Suarez,D.L.; Spackman,E.; Swayne,D.E.; Afonso,C.L.
EPI569482	NS	China	2007-Jan-11	A/chicken/Jiangsu/01/2007		Other Database Import	Zhao,M.; Gu,X.; Chen,H.; Liu,Q.; Zhong,L.; Huang,J.; Gu,M.; Liu,X.
EPI364039	NS	China	2007-Jul-01	A/duck/Shantou/1240/2007		Other Database Import	Huang,K.; Zhu,H.; Fan,X.; Wang,J.; Cheung,C.L.; Duan,L.; Hong,W.; Liu,Y.; Li,L.; Smith,D.K.; Chen,H.; Webster,R.G.; Webby,R.J.; Peiris,M.; Guan,Y.; Cheung,C. L.
EPI365117	NS	China	2007-Jun-01	A/duck/Fujian/1879/2007		Other Database Import	Huang,K.; Zhu,H.; Fan,X.; Wang,J.; Cheung,C.L.; Duan,L.; Hong,W.; Liu,Y.; Li,L.; Smith,D.K.; Chen,H.; Webster,R.G.; Webby,R.J.; Peiris,M.; Guan,Y.; Cheung,C. L.
EPI364988	NS	China	2007-Nov-01	A/duck/Fujian/6841/2007		Other Database Import	Huang,K.; Zhu,H.; Fan,X.; Wang,J.; Cheung,C.L.; Duan,L.; Hong,W.; Liu,Y.; Li,L.; Smith,D.K.; Chen,H.; Webster,R.G.; Webby,R.J.; Peiris,M.; Guan,Y.; Cheung,C. L.
EPI610322	NS	China	2007-Nov-20	A/chicken/Guangxi/LF/2007		Other Database Import	Peng,Y.; Xie,Z.; Liu,J.; Pang,Y.; Xie,L.; Luo,S.; Fan,Q.
EPI364942	NS	China	2007-Sep-01	A/duck/Fujian/4676/2007		Other Database Import	Huang,K.; Zhu,H.; Fan,X.; Wang,J.; Cheung,C.L.; Duan,L.; Hong,W.; Liu,Y.; Li,L.; Smith,D.K.; Chen,H.; Webster,R.G.; Webby,R.J.; Peiris,M.; Guan,Y.; Cheung,C. L.
EPI560125	NS	China	2008-Apr-01	A/chicken/Anhui/1/2008		Other Database Import	Zhu,Y.
EPI350661	NS	Vietnam	2008-Dec-01	A/duck/Vietnam/NCVD-140/2008	National Centre of Veterinary Diagnostics	Centers for Disease Control and Prevention	Davis,Todd; Rivailler,Pierre; Nguyen,Tung
EPI350745	NS	Vietnam	2008-Dec-01	A/duck/Vietnam/NCVD-160/2008	National Centre of Veterinary Diagnostics	Centers for Disease Control and Prevention	Davis,Todd; Rivailler,Pierre; Nguyen,Tung
EPI610275	NS	China	2008-Dec-12	A/chicken/Guangxi/DX/2008		Other Database Import	Peng,Y.; Xie,Z.; Liu,J.; Pang,Y.; Xie,L.; Luo,S.; Fan,Q.
EPI470720	NS	China	2008	A/chicken/Hong-Kong/NT155/2008		Other Database Import	Lam,T.T.Y.; Wang,J.; Shen,Y.; Zhou,B.; Duan,L.; Cheung,C.L.; Ma,C.; Lycett,S.J.; Leung,C.Y.H.; Chen,X.; Li,L.; Hong,W.; Chai,Y.; Zhou,L.; Liang,H.; Ou,Z.; Liu,Y.; Farooqui,A.; Kelvin,D.J.; Poon,L.L.M.; Smith,D.K.; Pybus,O.G.; Leung,G.M.; Shu,Y.; Webster,R.G.; Webby,R.J.; Peiris,J.S.M.; Rambaut,A.; Zhu,H.; Guan,Y.
EPI349856	NS	Vietnam	2008	A/chicken/Vietnam/NCVD-033/2008	National Centre of Veterinary Diagnostics	Centers for Disease Control and Prevention	Davis,Todd; Rivailler,Pierre; Nguyen,Tung
EPI350514	NS	Vietnam	2008	A/duck/Vietnam/NCVD-009/2008	National Centre of Veterinary Diagnostics	Centers for Disease Control and Prevention	Davis,Todd; Rivailler,Pierre; Nguyen,Tung
EPI177798	NS	Pakistan	2008-Jan-09	A/chicken/Pakistan/UDL-01/2008		Other Database Import
EPI349842	NS	Vietnam	2008-May-01	A/chicken/Vietnam/NCVD-03/2008	National Centre of Veterinary Diagnostics	Centers for Disease Control and Prevention	Davis,Todd; Rivailler,Pierre; Nguyen,Tung
EPI299286	NS	Japan	2008-Oct-08	A/avian/Japan/8KI0135/2008		Other Database Import	The NIAID Influenza Genome Sequencing Consortium
EPI1007370	NS	China	2008-Oct-09	A/duck/Hubei/S4170/2008		Other Database Import	Wang,G.; Deng,G.; Shi,J.; Luo,W.; Zhang,G.; Zhang,Q.; Liu,L.; Jiang,Y.; Li,C.; Sriwilaijaroen,N.; Hiramatsu,H.; Suzuki,Y.; Kawaoka,Y.; Chen,H.
EPI540305	NS	Bangladesh	2009-Dec-23	A/duck/Bangladesh/1574/2009	Institute of Epidemiology Disease Control and Research (IEDCR) & Bangladesh National Influenza Centre (NIC)	Centers for Disease Control and Prevention	Gerloff, Nancy; Simpson, Natosha; Davis, C. Todd
EPI350152	NS	Vietnam	2009	A/chicken/Vietnam/NCVD-390/2009	National Centre of Veterinary Diagnostics	Centers for Disease Control and Prevention	Davis,Todd; Rivailler,Pierre; Nguyen,Tung
EPI470615	NS	China	2009	A/duck/Jiangxi/8032/2009		Other Database Import	Lam,T.T.Y.; Wang,J.; Shen,Y.; Zhou,B.; Duan,L.; Cheung,C.L.; Ma,C.; Lycett,S.J.; Leung,C.Y.H.; Chen,X.; Li,L.; Hong,W.; Chai,Y.; Zhou,L.; Liang,H.; Ou,Z.; Liu,Y.; Farooqui,A.; Kelvin,D.J.; Poon,L.L.M.; Smith,D.K.; Pybus,O.G.; Leung,G.M.; Shu,Y.; Webster,R.G.; Webby,R.J.; Peiris,J.S.M.; Rambaut,A.; Zhu,H.; Guan,Y.
EPI350808	NS	Vietnam	2009	A/duck/Vietnam/NCVD-364/2009	National Centre of Veterinary Diagnostics	Centers for Disease Control and Prevention	Davis,Todd; Rivailler,Pierre; Nguyen,Tung
EPI350815	NS	Vietnam	2009	A/duck/Vietnam/NCVD-365/2009	National Centre of Veterinary Diagnostics	Centers for Disease Control and Prevention	Davis,Todd; Rivailler,Pierre; Nguyen,Tung
EPI350857	NS	Vietnam	2009	A/duck/Vietnam/NCVD-368/2009	National Centre of Veterinary Diagnostics	Centers for Disease Control and Prevention	Davis,Todd; Rivailler,Pierre; Nguyen,Tung
EPI350871	NS	Vietnam	2009	A/duck/Vietnam/NCVD-376/2009	National Centre of Veterinary Diagnostics	Centers for Disease Control and Prevention	Davis,Todd; Rivailler,Pierre; Nguyen,Tung
EPI351530	NS	Vietnam	2009	A/muscovy-duck/Vietnam/NCVD-384/2009	National Centre of Veterinary Diagnostics	Centers for Disease Control and Prevention	Davis,Todd; Rivailler,Pierre; Nguyen,Tung
EPI345766	NS	China	2009-Jun-01	A/duck/Eastern-China/10/2009		Other Database Import	Zhao,G.; Liu,X.
EPI500968	NS	China	2009-Mar-05	A/Duck/Guangdong/S1663/2009	Harbin Veterinary Research Institute (CAAS)	Harbin Veterinary Research Institute (CAAS)	Wang, G.J.; Deng,G.H.; Shi, J.Z.; Luo, W.Y.; Zhang, G.Q.; Zhang, Q.Y.; Liu, L.L.; Jiang, Y.P.; Li, C.J.; Sriwilaijaroen, N.; Hiramatsu, H.; Suzuki, Y.; Kawaoka, Y.; Chen, H.L.
EPI471869	NS	China	2009-Nov-14	A/duck/Guangxi/GXd-4/2009		Other Database Import	Xie,Z.; Zhou,C.; Peng,Y.; Liu,J.; Pang,Y.; Deng,X.; Xie,L.; Fan,Q.
EPI314016	NS	China	2009-Sep-10	A/duck/Tibet/S2/2009		Other Database Import	Suolang,S.; Jin,M.
EPI350472	NS	Vietnam	2010-Apr-01	A/chicken/Vietnam/NCVD-412/2010	National Centre of Veterinary Diagnostics	Centers for Disease Control and Prevention	Davis,Todd; Rivailler,Pierre; Nguyen,Tung
EPI1035783	NS	China	2010-Apr-08	A/duck/Guangxi/058/2010		Other Database Import	Li,M.; Xie,Z.X.; Xie,L.J.; Deng,X.W.; Xie,Q.Z.; Liu,J.B.; Fan,Q.; Pang,Y.S.; Luo,S.S.
EPI618040	NS	Georgia	2010-Apr-28	A/domestic-duck/Republic-of-Georgia/2/2010		Other Database Import	Wentworth,D.E.; Halpin,R.A.; Lin,X.; Simenauer,A.; Akopov,A.; Mohan,M.; Fedorova,N.; Tsitrin,T.; Puri,V.; Stockwell,T.; Amedeo,P.; Bishop,B.; Gupta,N.; Hoover,J.; Katzel,D.; Schobel,S.; Shrivastava,S.; Thovarai,V.; Bao,Y.; Sanders,R.; Zhdanov,S.; Kiryutin,B.; Lipman,D.J.; Tatusova,T.; Fouchier,R.A.M.
EPI501040	NS	China	2010-Dec-10	A/Duck/Guangxi/S4111/2010	Harbin Veterinary Research Institute (CAAS)	Harbin Veterinary Research Institute (CAAS)	Wang, G.J.; Deng,G.H.; Shi, J.Z.; Luo, W.Y.; Zhang, G.Q.; Zhang, Q.Y.; Liu, L.L.; Jiang, Y.P.; Li, C.J.; Sriwilaijaroen, N.; Hiramatsu, H.; Suzuki, Y.; Kawaoka, Y.; Chen, H.L.
EPI501096	NS	China	2010-Dec-10	A/Duck/Hunan/S4273/2010	Harbin Veterinary Research Institute (CAAS)	Harbin Veterinary Research Institute (CAAS)	Wang, G.J.; Deng,G.H.; Shi, J.Z.; Luo, W.Y.; Zhang, G.Q.; Zhang, Q.Y.; Liu, L.L.; Jiang, Y.P.; Li, C.J.; Sriwilaijaroen, N.; Hiramatsu, H.; Suzuki, Y.; Kawaoka, Y.; Chen, H.L.
EPI350166	NS	Vietnam	2010-Feb-01	A/chicken/Vietnam/NCVD-395/2010	National Centre of Veterinary Diagnostics	Centers for Disease Control and Prevention	Davis,Todd; Rivailler,Pierre; Nguyen,Tung
EPI383174	NS	China	2010-Feb-10	A/chicken/Jiangsu/k0402/2010		Other Database Import	Hu,J.; Zhao,K.; Liu,X.; Wang,X.; Chen,Z.
EPI470651	NS	China	2010	A/duck/Fujian/6390/2010		Other Database Import	Lam,T.T.Y.; Wang,J.; Shen,Y.; Zhou,B.; Duan,L.; Cheung,C.L.; Ma,C.; Lycett,S.J.; Leung,C.Y.H.; Chen,X.; Li,L.; Hong,W.; Chai,Y.; Zhou,L.; Liang,H.; Ou,Z.; Liu,Y.; Farooqui,A.; Kelvin,D.J.; Poon,L.L.M.; Smith,D.K.; Pybus,O.G.; Leung,G.M.; Shu,Y.; Webster,R.G.; Webby,R.J.; Peiris,J.S.M.; Rambaut,A.; Zhu,H.; Guan,Y.
EPI448073	NS	Bangladesh	2010-Jan-04	A/chicken/Bangladesh/1012/2010	Institute of Epidemiology Disease Control and Research (IEDCR) & Bangladesh National Influenza Centre (NIC)	Centers for Disease Control and Prevention	Gerloff, Nancy; Simpson, Natosha; Poh, Mee;Davis, Todd
EPI442013	NS	China	2010-Jan-27	A/goose/Guangdong/k0103/2010		Other Database Import	Zhao,K.; Gu,M.; Zhong,L.; Duan,Z.; Zhang,Y.; Zhu,Y.; Zhao,G.; Zhao,M.; Chen,Z.; Hu,S.; Liu,W.; Liu,X.; Peng,D.
EPI341552	NS	Cambodia	2010-Jan-28	A/chicken/Cambodia/TKCMB5T/2010		Other Database Import	Buchy,P.; Mardy,S.; San,S.
EPI504047	NS	Korea,-Republic-of	2010-Mar-01	A/wild-duck/SH38-64/2010		Other Database Import	Lee,K. J.; Choi,J. G.; Kang,H. M.; Song,B. M.; Lee,E. K.; Lee,H. S.; Lee,Y. J.
EPI500856	NS	China	2010-Mar-03	A/Chicken/Guangdong/S1312/2010	Harbin Veterinary Research Institute (CAAS)	Harbin Veterinary Research Institute (CAAS)	Wang, G.J.; Deng,G.H.; Shi, J.Z.; Luo, W.Y.; Zhang, G.Q.; Zhang, Q.Y.; Liu, L.L.; Jiang, Y.P.; Li, C.J.; Sriwilaijaroen, N.; Hiramatsu, H.; Suzuki, Y.; Kawaoka, Y.; Chen, H.L.
EPI1007170	NS	China	2010-Mar-05	A/chicken/Guangdong/S1453/2010		Other Database Import	Wang,G.; Deng,G.; Shi,J.; Luo,W.; Zhang,G.; Zhang,Q.; Liu,L.; Jiang,Y.; Li,C.; Sriwilaijaroen,N.; Hiramatsu,H.; Suzuki,Y.; Kawaoka,Y.; Chen,H.
EPI401604	NS	China	2010-May-08	A/duck/Guangxi/GXd-5/2010		Other Database Import	Xie,Z.; Xie,L.; Zhou,C.; Liu,J.; Pang,Y.; Deng,X.; Fan,Q.; Peng,Y.
EPI425554	NS	Vietnam	2010-Nov-01	A/duck/Vietnam/NCVD-645/2010	National Centre of Veterinary Diagnostics	Centers for Disease Control and Prevention
EPI471877	NS	China	2010-Nov-11	A/duck/Guangxi/GXd-6/2010		Other Database Import	Xie,Z.; Zhou,C.; Peng,Y.; Liu,J.; Pang,Y.; Deng,X.; Xie,L.; Fan,Q.
EPI348861	NS	Vietnam	2010-Nov-16	A/duck/Vietnam/NCVD-456/2010	National Institute of Hygiene and Epidemiology	Centers for Disease Control and Prevention	Davis,Todd; Rivailler,Pierre; Nguyen,Tung
EPI540353	NS	Bangladesh	2010-Oct-27	A/duck/Bangladesh/1766/2010	Institute of Epidemiology Disease Control and Research (IEDCR) & Bangladesh National Influenza Centre (NIC)	Centers for Disease Control and Prevention	Gerloff, Nancy; Simpson, Natosha; Davis, C. Todd
EPI424746	NS	Vietnam	2010-Oct-29	A/duck/Vietnam/NCVD-784/2010	National Centre of Veterinary Diagnostics	Centers for Disease Control and Prevention
EPI540532	NS	Bangladesh	2011-Apr-03	A/duck/Bangladesh/727/2011	Institute of Epidemiology Disease Control and Research (IEDCR) & Bangladesh National Influenza Centre (NIC)	Centers for Disease Control and Prevention	Gerloff, Nancy; Simpson, Natosha; Davis, C. Todd
EPI424898	NS	Vietnam	2011-Aug-04	A/duck/Vietnam/NCVD-935/2011	National Centre of Veterinary Diagnostics	Centers for Disease Control and Prevention
EPI387939	NS	Vietnam	2011-Dec-06	A/muscovy-duck/Vietnam/LBM66/2011		Other Database Import	Soda,K.; Hotta,K.; Nagai,Y.; Ito,T.; Mimura,W.
EPI401494	NS	Japan	2011-Feb-01	A/chicken/Aichi/2/2011		Other Database Import	Uchida,Y.; Suzuki,Y.; Shirakura,M.; Kawaguchi,A.; Nobusawa,E.; Tanikawa,T.; Hikono,H.; Takemae,N.; Mase,M.; Kanehira,K.; Hayashi,T.; Tagawa,Y.; Tashiro,M.; Saito,T.
EPI401476	NS	Japan	2011-Feb-01	A/chicken/Miyazaki/9/2011		Other Database Import	Uchida,Y.; Suzuki,Y.; Shirakura,M.; Kawaguchi,A.; Nobusawa,E.; Tanikawa,T.; Hikono,H.; Takemae,N.; Mase,M.; Kanehira,K.; Hayashi,T.; Tagawa,Y.; Tashiro,M.; Saito,T.
EPI401500	NS	Japan	2011-Feb-01	A/chicken/Wakayama/1/2011		Other Database Import	Uchida,Y.; Suzuki,Y.; Shirakura,M.; Kawaguchi,A.; Nobusawa,E.; Tanikawa,T.; Hikono,H.; Takemae,N.; Mase,M.; Kanehira,K.; Hayashi,T.; Tagawa,Y.; Tashiro,M.; Saito,T.
EPI448161	NS	Bangladesh	2011-Feb-07	A/crow/Bangladesh/316T/2011	Institute of Epidemiology Disease Control and Research (IEDCR) & Bangladesh National Influenza Centre (NIC)	Centers for Disease Control and Prevention	Gerloff, Nancy; Simpson, Natosha; Poh, Mee;Davis, Todd
EPI618041	NS	Georgia	2011-Feb-11	A/mallard/Republic-of-Georgia/12/2011		Other Database Import	Wentworth,D.E.; Halpin,R.A.; Lin,X.; Simenauer,A.; Akopov,A.; Mohan,M.; Fedorova,N.; Tsitrin,T.; Puri,V.; Stockwell,T.; Amedeo,P.; Bishop,B.; Gupta,N.; Hoover,J.; Katzel,D.; Schobel,S.; Shrivastava,S.; Thovarai,V.; Bao,Y.; Sanders,R.; Zhdanov,S.; Kiryutin,B.; Lipman,D.J.; Tatusova,T.; Fouchier,R.A.M.
EPI470657	NS	China	2011	A/common-teal/Hong-Kong/MPL1075/2011		Other Database Import	Lam,T.T.Y.; Wang,J.; Shen,Y.; Zhou,B.; Duan,L.; Cheung,C.L.; Ma,C.; Lycett,S.J.; Leung,C.Y.H.; Chen,X.; Li,L.; Hong,W.; Chai,Y.; Zhou,L.; Liang,H.; Ou,Z.; Liu,Y.; Farooqui,A.; Kelvin,D.J.; Poon,L.L.M.; Smith,D.K.; Pybus,O.G.; Leung,G.M.; Shu,Y.; Webster,R.G.; Webby,R.J.; Peiris,J.S.M.; Rambaut,A.; Zhu,H.; Guan,Y.
EPI425290	NS	Vietnam	2011	A/duck/Vietnam/NCVD-669/2011	National Centre of Veterinary Diagnostics	Centers for Disease Control and Prevention
EPI448217	NS	Bangladesh	2011-Jul-24	A/duck/Bangladesh/4124T/2011	Institute of Epidemiology Disease Control and Research (IEDCR) & Bangladesh National Influenza Centre (NIC)	Centers for Disease Control and Prevention	Gerloff, Nancy; Simpson, Natosha; Poh, Mee;Davis, Todd
EPI340434	NS	China	2011-Jun-01	A/duck/Zhejiang/0611-15/2011		Other Database Import	Wu,H.; Wu,N.
EPI425514	NS	Vietnam	2011-Jun-15	A/chicken/Vietnam/NCVD-780/2011	National Centre of Veterinary Diagnostics	Centers for Disease Control and Prevention
EPI401558	NS	Japan	2011-Mar-01	A/chicken/Chiba/2/2011		Other Database Import	Uchida,Y.; Suzuki,Y.; Shirakura,M.; Kawaguchi,A.; Nobusawa,E.; Tanikawa,T.; Hikono,H.; Takemae,N.; Mase,M.; Kanehira,K.; Hayashi,T.; Tagawa,Y.; Tashiro,M.; Saito,T.
EPI351716	NS	China	2011-Mar-01	A/chicken/Zhejiang/329/2011		Other Database Import	Wu,H.; Wu,N.
EPI448097	NS	Bangladesh	2011-Mar-20	A/duck/Bangladesh/1849/2011	Institute of Epidemiology Disease Control and Research (IEDCR) & Bangladesh National Influenza Centre (NIC)	Centers for Disease Control and Prevention	Gerloff, Nancy; Simpson, Natosha; Poh, Mee;Davis, Todd
EPI466308	NS	China	2011-May-21	A/chicken/Jiangsu/ZJDT/2011	Yangzhou University	Chinese Academy of Sciences	Daxin, P
EPI383208	NS	China	2011-Nov-29	A/chicken/Guangdong/C273/2011		Other Database Import	Jiao,P.; Yuan,R.; Wei,L.; Jia,B.; Cao,L.; Song,Y.; Gong,L.; Xu,C.; Ren,T.; Liao,M.
EPI574328	NS	Vietnam	2011-Oct-12	A/muscovy-duck/Vietnam/LBM21/2011		Other Database Import	Soda,K.; Hotta,K.; Trang,H.U.; Le,Q.M.; Yamashiro,T.; Ito,T.; Trang,U.H.
EPI470751	NS	China	2011-Sep-01	A/chicken/Hong-Kong/YU158/2011		Other Database Import	Lam,T.T.Y.; Wang,J.; Shen,Y.; Zhou,B.; Duan,L.; Cheung,C.L.; Ma,C.; Lycett,S.J.; Leung,C.Y.H.; Chen,X.; Li,L.; Hong,W.; Chai,Y.; Zhou,L.; Liang,H.; Ou,Z.; Liu,Y.; Farooqui,A.; Kelvin,D.J.; Poon,L.L.M.; Smith,D.K.; Pybus,O.G.; Leung,G.M.; Shu,Y.; Webster,R.G.; Webby,R.J.; Peiris,J.S.M.; Rambaut,A.; Zhu,H.; Guan,Y.
EPI703678	NS	China	2012-Dec-04	A/goose/Eastern-China/L1204/2012		Other Database Import	Sun,H.; Sun,Y.; Pu,J.; Liu,L.; Li,C.; Xu,G.; Qin,M.; Zhang,Y.; Zhao,H.; Wei,K.; Liu,J.
EPI540497	NS	Bangladesh	2012-Dec-15	A/poultry/Bangladesh/91354/2012	Institute of Epidemiology Disease Control and Research (IEDCR) & Bangladesh National Influenza Centre (NIC)	Centers for Disease Control and Prevention	Gerloff, Nancy; Simpson, Natosha; Davis, C. Todd
EPI510864	NS	Taiwan	2012-Dec-25	A/chicken/Taiwan/2437/2012		Other Database Import	Lee,C.C.; Zhu,H.; Huang,P.Y.; Peng,L.; Chang,Y.C.; Yip,C.H.; Li,Y.T.; Cheung,C.L.; Compans,R.; Yang,C.; Smith,D.K.; Lam,T.T.; King,C.C.; Guan,Y.; Lam,T.T.Y.
EPI812377	NS	Bhutan	2012-Feb-14	A/chicken/Bhutan/259/2012		Other Database Import	Franks,J.S.; Tenzin,S.; Tshering,D.; Rai,P.; Lhamo,K.; Dahal,N.; Dukpa,K.
EPI425386	NS	Vietnam	2012-Feb-16	A/duck/Vietnam/NCVD-1253/2012	National Centre of Veterinary Diagnostics	Centers for Disease Control and Prevention
EPI470779	NS	China	2012	A/chicken/Hong-Kong/YU150W/2012		Other Database Import	Lam,T.T.Y.; Wang,J.; Shen,Y.; Zhou,B.; Duan,L.; Cheung,C.L.; Ma,C.; Lycett,S.J.; Leung,C.Y.H.; Chen,X.; Li,L.; Hong,W.; Chai,Y.; Zhou,L.; Liang,H.; Ou,Z.; Liu,Y.; Farooqui,A.; Kelvin,D.J.; Poon,L.L.M.; Smith,D.K.; Pybus,O.G.; Leung,G.M.; Shu,Y.; Webster,R.G.; Webby,R.J.; Peiris,J.S.M.; Rambaut,A.; Zhu,H.; Guan,Y.
EPI470781	NS	China	2012	A/chicken/Hong-Kong/YU262W/2012		Other Database Import	Lam,T.T.Y.; Wang,J.; Shen,Y.; Zhou,B.; Duan,L.; Cheung,C.L.; Ma,C.; Lycett,S.J.; Leung,C.Y.H.; Chen,X.; Li,L.; Hong,W.; Chai,Y.; Zhou,L.; Liang,H.; Ou,Z.; Liu,Y.; Farooqui,A.; Kelvin,D.J.; Poon,L.L.M.; Smith,D.K.; Pybus,O.G.; Leung,G.M.; Shu,Y.; Webster,R.G.; Webby,R.J.; Peiris,J.S.M.; Rambaut,A.; Zhu,H.; Guan,Y.
EPI585432	NS	India	2012-Jan-04	A/chicken/India/01CA06/2012		Other Database Import	Nagarajan,S.; Syed,Z.; Tosh,C.; Murugkar,H.V.; Kumar,M.; Kulkarni,D.D.
EPI764738	NS	China	2012-Jul-03	A/chicken/Shanxi/0703/2012		Other Database Import	Pu,J.; Wang,S.; Yin,Y.; Zhang,G.; Carter,R.A.; Wang,J.; Xu,G.; Sun,H.; Wang,M.; Wen,C.; Wei,Y.; Wang,D.; Zhu,B.; Lemmon,G.; Jiao,Y.; Duan,S.; Wang,Q.; Du,Q.; Sun,M.; Bao,J.; Sun,Y.; Zhao,J.; Zhang,H.; Wu,G.; Liu,J.; Webster,R.G.; Lv,N.
EPI461026	NS	Vietnam	2012-Jul-28	A/duck/Vietnam/QB1207/2012		Other Database Import	Bui,V.N.; Dao,T.D.; Nguyen,L.T.; Nguyen,T.N.T.; Bui,A.N.; Trinh,D.Q.; Inui,K.; Runstadler,J.; Ogawa,H.; Nguyen,K.V.; Imai,K.; Nguyen,T.T.H.
EPI692548	NS	China	2012-Jun-05	A/duck/Jiangxi/S21055/2012		Other Database Import	Liang,L.; Deng,G.; Shi,J.; Wang,S.; Zhang,Q.; Kong,H.; Gu,C.; Guan,Y.; Suzuki,Y.; Li,Y.; Jiang,Y.; Tian,G.; Liu,L.; Li,C.; Chen,H.
EPI466380	NS	China	2012-Mar-24	A/chicken/Jiangsu/CZYWP/2012	Yangzhou University	Chinese Academy of Sciences	Daxin, P
EPI440914	NS	China	2012-Nov-17	A/chicken/Shaanxi/11/2012		Other Database Import	Ren,J.; Wang,J.
EPI540489	NS	Bangladesh	2012-Nov-29	A/avian/Bangladesh/91286/2012	Institute of Epidemiology Disease Control and Research (IEDCR) & Bangladesh National Influenza Centre (NIC)	Centers for Disease Control and Prevention	Gerloff, Nancy; Simpson, Natosha; Davis, C. Todd
EPI533884	NS	China	2012-Sep-07	A/duck/Guangxi/125D17/2012		Other Database Import	Wu,A.Q.; Xie,Z.X.; Xie,L.J.; Xie,Q.Z.; Luo,S.S.; Liu,J.B.; Deng,X.W.; Fan,Q.; Pang,Y.S.
EPI532274	NS	China	2013-Apr-01	A/chicken/Zhejiang/C481/2013		Other Database Import	Wu,H.; Wu,N.; Guo,C.; Li,L.
EPI649333	NS	China	2013-Apr-01	A/duck/Zhejiang/413/2013		Other Database Import	Wu,H.; Peng,X.; Cheng,L.; Lu,X.; Jin,C.; Xie,T.; Yao,H.; Wu,N.
EPI681001	NS	China	2013-Apr-08	A/pigeon/Zhejiang/P5/2013		Other Database Import	Wu,H.; Peng,X.; Cheng,L.; Lu,X.; Jin,C.; Xie,T.; Yao,H.; Wu,N.
EPI589557	NS	Vietnam	2013-Apr-13	A/muscovy-duck/Quang-Ninh/7c121/2013		Other Database Import	Soda,K.; Hotta,K.; Trang,H.U.; Le,Q.M.; Yamashiro,T.; Ito,T.
EPI457847	NS	China	2013-Apr-16	A/chicken/Jiangsu/SC537/2013	Harbin Veterinary Research Institute (CAAS)	Harbin Veterinary Research Institute (CAAS)	Zhang, Q.; Shi, J.; Deng, G.; Guo, J.; Zeng, X.; He, X.; Kong, H.; Gu, C.; Li, X.; Liu, J.; Wang, G.; Chen, Y.; Liu, L.; Liang, L.; Li, Y.; Fan, J.; Wang, J.; Li, W.; Guan, L.; Li, Q.; Yang, H.; Chen, P.; Jiang, L.; Guan, Y.; Xin, X.; Jiang, Y.; Tian, G.; Wang, X.; Qiao, C.; Li, C.; Bu, Z.; Chen, H.
EPI544962	NS	China	2013-Apr-25	A/duck/Shandong/Q1/2013		Other Database Import	Li,Q.
EPI544798	NS	China	2013-Apr-26	A/duck/Shanghai/SH3/2013		Other Database Import	Yang,D.; Liu,J.; Ju,H.; Ge,F.; Wang,J.; Li,X.; Liu,P.; Zhou,J.
EPI775061	NS	Vietnam	2013-Aug-13	A/chicken/DongNai/0182/2013		Other Database Import	Cao,B.V.; Le Ha,T.D.; Mai,V.N.; Dang Trinh,M.A.; Le Phan,K.N.; Vo Tran,N.T.; Hoang,T.
EPI591590	NS	China	2013-Aug-25	A/duck/Jiangxi/20189/2013		Other Database Import	Lam,T.Y.; Zhou,B.; Wang,J.; Chai,Y.; Shen,Y.; Chen,X.; Ma,C.; Hong,W.; Chen,Y.; Zhang,Y.; Duan,L.; Chen,P.; Jiang,J.; Li,L.; Poon,L.M.; Webby,R.J.; Smith,D.K.; Leung,G.M.; Peiris,J.M.; Holmes,E.C.; Guan,Y.; Zhu,H.
EPI599753	NS	China	2013-Dec-08	A/chicken/Jiangxi/31856/2013		Other Database Import	Ma,C.; Lam,T.T.Y.; Chai,Y.; Wang,J.; Fan,X.; Hong,W.; Zhang,Y.; Li,L.; Liu,Y.; Smith,D.K.; Webby,R.J.; Peiris,J.S.M.; Zhu,H.; Guan,Y.
EPI583428	NS	China	2013-Dec-11	A/chicken/Shenzhen/1098/2013		Other Database Import	Lam,T.Y.; Zhou,B.; Wang,J.; Chai,Y.; Shen,Y.; Chen,X.; Ma,C.; Hong,W.; Chen,Y.; Zhang,Y.; Duan,L.; Chen,P.; Jiang,J.; Li,L.; Poon,L.M.; Webby,R.J.; Smith,D.K.; Leung,G.M.; Peiris,J.M.; Holmes,E.C.; Guan,Y.; Zhu,H.
EPI583506	NS	China	2013-Dec-12	A/chicken/Shenzhen/1799/2013		Other Database Import	Lam,T.Y.; Zhou,B.; Wang,J.; Chai,Y.; Shen,Y.; Chen,X.; Ma,C.; Hong,W.; Chen,Y.; Zhang,Y.; Duan,L.; Chen,P.; Jiang,J.; Li,L.; Poon,L.M.; Webby,R.J.; Smith,D.K.; Leung,G.M.; Peiris,J.M.; Holmes,E.C.; Guan,Y.; Zhu,H.
EPI602451	NS	China	2013-Dec-15	A/duck/Jiangxi/33665/2013		Other Database Import	Ma,C.; Lam,T.T.Y.; Chai,Y.; Wang,J.; Fan,X.; Hong,W.; Zhang,Y.; Li,L.; Liu,Y.; Smith,D.K.; Webby,R.J.; Peiris,J.S.M.; Zhu,H.; Guan,Y.
EPI602385	NS	China	2013-Dec-15	A/duck/Jiangxi/33713/2013		Other Database Import	Ma,C.; Lam,T.T.Y.; Chai,Y.; Wang,J.; Fan,X.; Hong,W.; Zhang,Y.; Li,L.; Liu,Y.; Smith,D.K.; Webby,R.J.; Peiris,J.S.M.; Zhu,H.; Guan,Y.
EPI599883	NS	China	2013-Dec-15	A/duck/Jiangxi/33779/2013		Other Database Import	Ma,C.; Lam,T.T.Y.; Chai,Y.; Wang,J.; Fan,X.; Hong,W.; Zhang,Y.; Li,L.; Liu,Y.; Smith,D.K.; Webby,R.J.; Peiris,J.S.M.; Zhu,H.; Guan,Y.
EPI600295	NS	China	2013-Dec-15	A/migratory-duck/Jiangxi/33195/2013		Other Database Import	Ma,C.; Lam,T.T.Y.; Chai,Y.; Wang,J.; Fan,X.; Hong,W.; Zhang,Y.; Li,L.; Liu,Y.; Smith,D.K.; Webby,R.J.; Peiris,J.S.M.; Zhu,H.; Guan,Y.
EPI583590	NS	China	2013-Dec-18	A/chicken/Dongguan/2754/2013		Other Database Import	Lam,T.Y.; Zhou,B.; Wang,J.; Chai,Y.; Shen,Y.; Chen,X.; Ma,C.; Hong,W.; Chen,Y.; Zhang,Y.; Duan,L.; Chen,P.; Jiang,J.; Li,L.; Poon,L.M.; Webby,R.J.; Smith,D.K.; Leung,G.M.; Peiris,J.M.; Holmes,E.C.; Guan,Y.; Zhu,H.
EPI581701	NS	China	2013-Dec-18	A/silkie-chicken/Dongguan/3284/2013		Other Database Import	Lam,T.Y.; Zhou,B.; Wang,J.; Chai,Y.; Shen,Y.; Chen,X.; Ma,C.; Hong,W.; Chen,Y.; Zhang,Y.; Duan,L.; Chen,P.; Jiang,J.; Li,L.; Poon,L.M.; Webby,R.J.; Smith,D.K.; Leung,G.M.; Peiris,J.M.; Holmes,E.C.; Guan,Y.; Zhu,H.
EPI583660	NS	China	2013-Dec-19	A/chicken/Dongguan/3409/2013		Other Database Import	Lam,T.Y.; Zhou,B.; Wang,J.; Chai,Y.; Shen,Y.; Chen,X.; Ma,C.; Hong,W.; Chen,Y.; Zhang,Y.; Duan,L.; Chen,P.; Jiang,J.; Li,L.; Poon,L.M.; Webby,R.J.; Smith,D.K.; Leung,G.M.; Peiris,J.M.; Holmes,E.C.; Guan,Y.; Zhu,H.
EPI581897	NS	China	2013-Dec-19	A/chicken/Dongguan/3935/2013		Other Database Import	Lam,T.Y.; Zhou,B.; Wang,J.; Chai,Y.; Shen,Y.; Chen,X.; Ma,C.; Hong,W.; Chen,Y.; Zhang,Y.; Duan,L.; Chen,P.; Jiang,J.; Li,L.; Poon,L.M.; Webby,R.J.; Smith,D.K.; Leung,G.M.; Peiris,J.M.; Holmes,E.C.; Guan,Y.; Zhu,H.
EPI601860	NS	China	2013-Dec-29	A/chicken/Jiangxi/36223/2013		Other Database Import	Ma,C.; Lam,T.T.Y.; Chai,Y.; Wang,J.; Fan,X.; Hong,W.; Zhang,Y.; Li,L.; Liu,Y.; Smith,D.K.; Webby,R.J.; Peiris,J.S.M.; Zhu,H.; Guan,Y.
EPI838165	NS	China	2013	A/chicken/Sichuan/SIC8/2013		Other Database Import	Liu,Y.; Lai,H.; Li,L.; Chen,R.
EPI470801	NS	China	2013	A/chicken/Wenzhou/640/2013		Other Database Import	Lam,T.T.Y.; Wang,J.; Shen,Y.; Zhou,B.; Duan,L.; Cheung,C.L.; Ma,C.; Lycett,S.J.; Leung,C.Y.H.; Chen,X.; Li,L.; Hong,W.; Chai,Y.; Zhou,L.; Liang,H.; Ou,Z.; Liu,Y.; Farooqui,A.; Kelvin,D.J.; Poon,L.L.M.; Smith,D.K.; Pybus,O.G.; Leung,G.M.; Shu,Y.; Webster,R.G.; Webby,R.J.; Peiris,J.S.M.; Rambaut,A.; Zhu,H.; Guan,Y.
EPI898657	NS	Vietnam	2013-Jan-09	A/chicken/Vietnam/NCVD-2693/2013		Other Database Import	Davis,T.; Jang,Y.
EPI510801	NS	Taiwan	2013-Jan-10	A/duck/Taiwan/4376/2013		Other Database Import	Lee,C.C.; Zhu,H.; Huang,P.Y.; Peng,L.; Chang,Y.C.; Yip,C.H.; Li,Y.T.; Cheung,C.L.; Compans,R.; Yang,C.; Smith,D.K.; Lam,T.T.; King,C.C.; Guan,Y.; Lam,T.T.Y.
EPI466452	NS	China	2013-Jan-23	A/chicken/Jiangsu/ZJ4/2013	Yangzhou University	Chinese Academy of Sciences	Daxin, P
EPI1061232	NS	China	2013-Jul-07	A/duck/Zhejiang/7731/2013		Other Database Import	Wu,H.; Lu,R.; Peng,X.; Liu,F.; Cheng,L.; Wu,N.
EPI598948	NS	China	2013-Jul-10	A/duck/Wuxi/2/2013		Other Database Import	Ma,M.J.; Yang,X.X.; Qian,Y.H.; Zhao,S.Y.; Hua,S.; Wang,T.C.; Chen,S.H.; Ma,G.Y.; Sang,X.Y.; Liu,L.N.; Wu,A.P.; Jiang,T.J.; Gao,Y.W.; Gray,G.C.; Zhao,T.; Ling,X.; Wang,J.L.; Lu,B.; Qian,J.; Cao,W.C.; Ma,M. J.; Yang,X. X.; Cao,W. C.
EPI1061235	NS	China	2013-Jul-17	A/duck/Zhejiang/71731/2013		Other Database Import	Wu,H.; Lu,R.; Peng,X.; Liu,F.; Cheng,L.; Wu,N.
EPI1061236	NS	China	2013-Jul-17	A/duck/Zhejiang/71737/2013		Other Database Import	Wu,H.; Lu,R.; Peng,X.; Liu,F.; Cheng,L.; Wu,N.
EPI600058	NS	China	2013-Jul-21	A/chicken/Jiangxi/17403/2013		Other Database Import	Ma,C.; Lam,T.T.Y.; Chai,Y.; Wang,J.; Fan,X.; Hong,W.; Zhang,Y.; Li,L.; Liu,Y.; Smith,D.K.; Webby,R.J.; Peiris,J.S.M.; Zhu,H.; Guan,Y.
EPI471180	NS	Vietnam	2013-Jun-05	A/muscovy-duck/Vietnam/LBM436/2013		Other Database Import	Nakamura,Y.; Soda,K.; Hotta,K.; Lee,M.Q.; Ito,T.
EPI568770	NS	China	2013-Mar-07	A/chicken/Shandong/qd0307/2013		Other Database Import	Pu,J.; Wang,S.; Yin,Y.; Zhang,G.; Carter,R.A.; Wang,J.; Xu,G.; Sun,H.; Wang,M.; Wen,C.; Wei,Y.; Wang,D.; Zhu,B.; Lemmon,G.; Jiao,Y.; Duan,S.; Wang,Q.; Du,Q.; Sun,M.; Bao,J.; Sun,Y.; Zhao,J.; Zhang,H.; Wu,G.; Liu,J.; Webster,R.G.; Lv,N.
EPI530993	NS	China	2013-Nov-14	A/duck/Zhejiang/W24/2013		Other Database Import	Wu,H.; Peng,X.; Xu,L.; Jin,C.; Cheng,L.; Lu,X.; Xie,T.; Yao,H.; Wu,N.
EPI681025	NS	China	2013-Oct-16	A/chicken/Zhejiang/C46/2013		Other Database Import	Wu,H.; Peng,X.; Cheng,L.; Lu,X.; Jin,C.; Xie,T.; Yao,H.; Wu,N.
EPI534880	NS	China	2013-Oct-16	A/duck/Zhejiang/D16/2013		Other Database Import	Wu,H.; Wu,N.; Peng,X.; Jin,C.; Lu,X.; Cheng,L.; Yao,H.; Li,L.
EPI596655	NS	China	2013-Oct-20	A/chicken/Shaoxing/2414/2013		Other Database Import	Lam,T.Y.; Zhou,B.; Wang,J.; Chai,Y.; Shen,Y.; Chen,X.; Ma,C.; Hong,W.; Chen,Y.; Zhang,Y.; Duan,L.; Chen,P.; Jiang,J.; Li,L.; Poon,L.M.; Webby,R.J.; Smith,D.K.; Leung,G.M.; Peiris,J.M.; Holmes,E.C.; Guan,Y.; Zhu,H.
EPI596716	NS	China	2013-Oct-23	A/chicken/Wenzhou/3330/2013		Other Database Import	Lam,T.Y.; Zhou,B.; Wang,J.; Chai,Y.; Shen,Y.; Chen,X.; Ma,C.; Hong,W.; Chen,Y.; Zhang,Y.; Duan,L.; Chen,P.; Jiang,J.; Li,L.; Poon,L.M.; Webby,R.J.; Smith,D.K.; Leung,G.M.; Peiris,J.M.; Holmes,E.C.; Guan,Y.; Zhu,H.
EPI764531	NS	China	2013-Oct-24	A/chicken/Huzhou/3791/2013		Other Database Import	Lam,T.Y.; Zhou,B.; Wang,J.; Chai,Y.; Shen,Y.; Chen,X.; Ma,C.; Hong,W.; Chen,Y.; Zhang,Y.; Duan,L.; Chen,P.; Jiang,J.; Li,L.; Poon,L.M.; Webby,R.J.; Smith,D.K.; Leung,G.M.; Peiris,J.M.; Holmes,E.C.; Guan,Y.; Zhu,H.
EPI764588	NS	China	2013-Oct-24	A/chicken/Huzhou/4076/2013		Other Database Import	Lam,T.Y.; Zhou,B.; Wang,J.; Chai,Y.; Shen,Y.; Chen,X.; Ma,C.; Hong,W.; Chen,Y.; Zhang,Y.; Duan,L.; Chen,P.; Jiang,J.; Li,L.; Poon,L.M.; Webby,R.J.; Smith,D.K.; Leung,G.M.; Peiris,J.M.; Holmes,E.C.; Guan,Y.; Zhu,H.
EPI764647	NS	China	2013-Oct-29	A/chicken/Shaoxing/5493/2013		Other Database Import	Lam,T.Y.; Zhou,B.; Wang,J.; Chai,Y.; Shen,Y.; Chen,X.; Ma,C.; Hong,W.; Chen,Y.; Zhang,Y.; Duan,L.; Chen,P.; Jiang,J.; Li,L.; Poon,L.M.; Webby,R.J.; Smith,D.K.; Leung,G.M.; Peiris,J.M.; Holmes,E.C.; Guan,Y.; Zhu,H.
EPI592495	NS	China	2014-Apr-06	A/chicken/Jiangxi/13515/2014		Other Database Import	Lam,T.Y.; Zhou,B.; Wang,J.; Chai,Y.; Shen,Y.; Chen,X.; Ma,C.; Hong,W.; Chen,Y.; Zhang,Y.; Duan,L.; Chen,P.; Jiang,J.; Li,L.; Poon,L.M.; Webby,R.J.; Smith,D.K.; Leung,G.M.; Peiris,J.M.; Holmes,E.C.; Guan,Y.; Zhu,H.
EPI592581	NS	China	2014-Apr-06	A/chicken/Jiangxi/13543/2014		Other Database Import	Lam,T.Y.; Zhou,B.; Wang,J.; Chai,Y.; Shen,Y.; Chen,X.; Ma,C.; Hong,W.; Chen,Y.; Zhang,Y.; Duan,L.; Chen,P.; Jiang,J.; Li,L.; Poon,L.M.; Webby,R.J.; Smith,D.K.; Leung,G.M.; Peiris,J.M.; Holmes,E.C.; Guan,Y.; Zhu,H.
EPI1036030	NS	China	2014-Apr-14	A/pigeon/Guangxi/164/2014		Other Database Import	Li,M.; Xie,Z.X.; Xie,L.J.; Deng,X.W.; Xie,Q.Z.; Liu,J.B.; Fan,Q.; Pang,Y.S.; Luo,S.S.
EPI593234	NS	China	2014-Apr-16	A/chicken/Shantou/2556/2014		Other Database Import	Lam,T.Y.; Zhou,B.; Wang,J.; Chai,Y.; Shen,Y.; Chen,X.; Ma,C.; Hong,W.; Chen,Y.; Zhang,Y.; Duan,L.; Chen,P.; Jiang,J.; Li,L.; Poon,L.M.; Webby,R.J.; Smith,D.K.; Leung,G.M.; Peiris,J.M.; Holmes,E.C.; Guan,Y.; Zhu,H.
EPI593241	NS	China	2014-Apr-16	A/chicken/Shantou/2562/2014		Other Database Import	Lam,T.Y.; Zhou,B.; Wang,J.; Chai,Y.; Shen,Y.; Chen,X.; Ma,C.; Hong,W.; Chen,Y.; Zhang,Y.; Duan,L.; Chen,P.; Jiang,J.; Li,L.; Poon,L.M.; Webby,R.J.; Smith,D.K.; Leung,G.M.; Peiris,J.M.; Holmes,E.C.; Guan,Y.; Zhu,H.
EPI592650	NS	China	2014-Apr-20	A/chicken/Jiangxi/14479/2014		Other Database Import	Lam,T.Y.; Zhou,B.; Wang,J.; Chai,Y.; Shen,Y.; Chen,X.; Ma,C.; Hong,W.; Chen,Y.; Zhang,Y.; Duan,L.; Chen,P.; Jiang,J.; Li,L.; Poon,L.M.; Webby,R.J.; Smith,D.K.; Leung,G.M.; Peiris,J.M.; Holmes,E.C.; Guan,Y.; Zhu,H.
EPI683093	NS	China	2014-Dec-01	A/turtledove/Wuhan/WHBJ12/2014		Other Database Import	Chen,L. J.; Lin,X. D.; Guo,W. P.; Tian,J. H.; Zhang,Y. Z.
EPI969339	NS	Korea,-Republic-of	2014-Dec-02	A/wild-bird/Korea/SK14/2014		Other Database Import	Koo,B. S.; Yoon,S. W.
EPI845968	NS	Japan	2014-Dec-19	A/mandarin-duck/Gifu/2112D001/2014		Other Database Import	Usui,T.; Soda,K.; Tomioka,Y.; Okamura,M.; Ishihara,T.; Yano,M.; Yabuta,T.; Takakuwa,H.; Otsuki,K.; Ito,H.; Ito,T.; Yamaguchi,T.
EPI895334	NS	China	2014-Dec-22	A/Anser-fabalis/China/Anhui/L180/2014		Other Database Import	Ye,G.; Liang,C.H.; Ping,H.Y.; Hua,D.G.; Cheng,Y.Q.
EPI895350	NS	China	2014-Dec-22	A/Anser-fabalis/China/Anhui/L256/2014		Other Database Import	Ye,G.; Liang,C.H.; Ping,H.Y.; Hua,D.G.; Cheng,Y.Q.
EPI561678	NS	Korea,-Republic-of	2014-Feb-01	A/bean-goose/Korea/H328/2014		Other Database Import	Jeong,J.; Kang,H.M.; Lee,E.K.; Song,B.M.; Kwon,Y.K.; Kim,H.R.; Choi,K.S.; Kim,J.Y.; Lee,H.J.; Moon,O.K.; Jeong,W.; Choi,J.; Baek,J.H.; Joo,Y.S.; Park,Y.H.; Lee,H.S.; Lee,Y.J.; Lee,Y. J.; Kang,H. M.; Lee,E. K.; Song,B. M.; Lee,K. J.; Hong,M. S.
EPI703682	NS	China	2014-Feb-15	A/duck/Eastern-China/S0215/2014		Other Database Import	Sun,H.; Sun,Y.; Pu,J.; Liu,L.; Li,C.; Xu,G.; Qin,M.; Zhang,Y.; Zhao,H.; Wei,K.; Liu,J.
EPI594280	NS	China	2014-Feb-18	A/chicken/Jiangxi/10953/2014		Other Database Import	Lam,T.Y.; Zhou,B.; Wang,J.; Chai,Y.; Shen,Y.; Chen,X.; Ma,C.; Hong,W.; Chen,Y.; Zhang,Y.; Duan,L.; Chen,P.; Jiang,J.; Li,L.; Poon,L.M.; Webby,R.J.; Smith,D.K.; Leung,G.M.; Peiris,J.M.; Holmes,E.C.; Guan,Y.; Zhu,H.
EPI594329	NS	China	2014-Feb-18	A/chicken/Jiangxi/10961/2014		Other Database Import	Lam,T.Y.; Zhou,B.; Wang,J.; Chai,Y.; Shen,Y.; Chen,X.; Ma,C.; Hong,W.; Chen,Y.; Zhang,Y.; Duan,L.; Chen,P.; Jiang,J.; Li,L.; Poon,L.M.; Webby,R.J.; Smith,D.K.; Leung,G.M.; Peiris,J.M.; Holmes,E.C.; Guan,Y.; Zhu,H.
EPI597276	NS	China	2014-Feb-20	A/chicken/Dongguan/749/2014		Other Database Import	Lam,T.Y.; Zhou,B.; Wang,J.; Chai,Y.; Shen,Y.; Chen,X.; Ma,C.; Hong,W.; Chen,Y.; Zhang,Y.; Duan,L.; Chen,P.; Jiang,J.; Li,L.; Poon,L.M.; Webby,R.J.; Smith,D.K.; Leung,G.M.; Peiris,J.M.; Holmes,E.C.; Guan,Y.; Zhu,H.
EPI597328	NS	China	2014-Feb-20	A/chicken/Dongguan/836/2014		Other Database Import	Lam,T.Y.; Zhou,B.; Wang,J.; Chai,Y.; Shen,Y.; Chen,X.; Ma,C.; Hong,W.; Chen,Y.; Zhang,Y.; Duan,L.; Chen,P.; Jiang,J.; Li,L.; Poon,L.M.; Webby,R.J.; Smith,D.K.; Leung,G.M.; Peiris,J.M.; Holmes,E.C.; Guan,Y.; Zhu,H.
EPI596858	NS	China	2014-Feb-20	A/chicken/Dongguan/856/2014		Other Database Import	Lam,T.Y.; Zhou,B.; Wang,J.; Chai,Y.; Shen,Y.; Chen,X.; Ma,C.; Hong,W.; Chen,Y.; Zhang,Y.; Duan,L.; Chen,P.; Jiang,J.; Li,L.; Poon,L.M.; Webby,R.J.; Smith,D.K.; Leung,G.M.; Peiris,J.M.; Holmes,E.C.; Guan,Y.; Zhu,H.
EPI528348	NS	China	2014-Feb-20	A/Chicken/Jilin/13199/2014	WHO Chinese National Influenza Center	WHO Chinese National Influenza Center	Wang,Dayan;Gao,Rongbao;Yang,Lei;Zhou,Shumei;Li,Xiyan;Zhou,Jianfang;Zhu,Wenfei;Guo,Junfeng;Li,Xiaodan;Dong,Jie;Huang,Weijuan;Zhang,Ye;Dong,Libo;Zhao,Xiang;Lu,Jian;Lan,Yu;Shu,Yuelong
EPI898452	NS	Vietnam	2014-Feb-20	A/chicken/Vietnam/NCVD14-A461/2014		Other Database Import	Davis,T.; Jang,Y.
EPI597580	NS	China	2014-Feb-21	A/chicken/Dongguan/1415/2014		Other Database Import	Lam,T.Y.; Zhou,B.; Wang,J.; Chai,Y.; Shen,Y.; Chen,X.; Ma,C.; Hong,W.; Chen,Y.; Zhang,Y.; Duan,L.; Chen,P.; Jiang,J.; Li,L.; Poon,L.M.; Webby,R.J.; Smith,D.K.; Leung,G.M.; Peiris,J.M.; Holmes,E.C.; Guan,Y.; Zhu,H.
EPI597100	NS	China	2014-Feb-21	A/chicken/Dongguan/1523/2014		Other Database Import	Lam,T.Y.; Zhou,B.; Wang,J.; Chai,Y.; Shen,Y.; Chen,X.; Ma,C.; Hong,W.; Chen,Y.; Zhang,Y.; Duan,L.; Chen,P.; Jiang,J.; Li,L.; Poon,L.M.; Webby,R.J.; Smith,D.K.; Leung,G.M.; Peiris,J.M.; Holmes,E.C.; Guan,Y.; Zhu,H.
EPI837640	NS	China	2014-Feb-26	A/migratory-waterfowl/Hubei/Chenhu1347/2014		Other Database Import	Bi,Y.; Liu,H.; Xiong,C.; Di,Liu.; Shi,W.; Li,M.; Liu,S.; Chen,J.; Chen,G.; Li,Y.; Yang,G.; Lei,Y.; Xiong,Y.; Lei,F.; Wang,H.; Chen,Q.; Gao,G.F.
EPI601299	NS	China	2014-Jan-05	A/chicken/Jiangxi/1244/2014		Other Database Import	Ma,C.; Lam,T.T.Y.; Chai,Y.; Wang,J.; Fan,X.; Hong,W.; Zhang,Y.; Li,L.; Liu,Y.; Smith,D.K.; Webby,R.J.; Peiris,J.S.M.; Zhu,H.; Guan,Y.
EPI601891	NS	China	2014-Jan-05	A/chicken/Jiangxi/1271/2014		Other Database Import	Ma,C.; Lam,T.T.Y.; Chai,Y.; Wang,J.; Fan,X.; Hong,W.; Zhang,Y.; Li,L.; Liu,Y.; Smith,D.K.; Webby,R.J.; Peiris,J.S.M.; Zhu,H.; Guan,Y.
EPI652965	NS	China	2014-Jan-10	A/chicken/Qingdao/014/2014		Other Database Import	Wang,K.; Zhuang,Q.; Chen,J.
EPI601278	NS	China	2014-Jan-12	A/chicken/Jiangxi/3119/2014		Other Database Import	Ma,C.; Lam,T.T.Y.; Chai,Y.; Wang,J.; Fan,X.; Hong,W.; Zhang,Y.; Li,L.; Liu,Y.; Smith,D.K.; Webby,R.J.; Peiris,J.S.M.; Zhu,H.; Guan,Y.
EPI602467	NS	China	2014-Jan-12	A/chicken/Jiangxi/3152/2014		Other Database Import	Ma,C.; Lam,T.T.Y.; Chai,Y.; Wang,J.; Fan,X.; Hong,W.; Zhang,Y.; Li,L.; Liu,Y.; Smith,D.K.; Webby,R.J.; Peiris,J.S.M.; Zhu,H.; Guan,Y.
EPI509712	NS	Korea,-Republic-of	2014-Jan-17	A/broiler-duck/Korea/Buan2/2014		Other Database Import	Lee,Y. J.; Kang,H. M.; Lee,E. K.; Song,B. M.; Jeong,J.; Kwon,Y. K.; Kim,H. R.; Lee,K. J.; Hong,M. S.; Jang,I.; Choi,K. S.; Kim,J. Y.; Lee,H. J.; Kang,M. S.; Jeong,O. M.; Baek,J. H.; Joo,Y. S.; Park,Y.Ho.; Lee,H. S.; Park,Y.H.
EPI672778	NS	China	2014-Jan-20	A/wildfowl/China/472/2014	Institute of Poultry Science, Shandong, Academy of Agricultural Science	South China Agricultural University	Wang, Youling
EPI561546	NS	Korea,-Republic-of	2014-Jan-22	A/Baikal-teal/Korea/H68/2014		Other Database Import	Jeong,J.; Kang,H.M.; Lee,E.K.; Song,B.M.; Kwon,Y.K.; Kim,H.R.; Choi,K.S.; Kim,J.Y.; Lee,H.J.; Moon,O.K.; Jeong,W.; Choi,J.; Baek,J.H.; Joo,Y.S.; Park,Y.H.; Lee,H.S.; Lee,Y.J.; Lee,Y. J.; Kang,H. M.; Lee,E. K.; Song,B. M.; Lee,K. J.; Hong,M. S.
EPI561595	NS	Korea,-Republic-of	2014-Jan-25	A/breeder-duck/Korea/H128/2014		Other Database Import	Jeong,J.; Kang,H.M.; Lee,E.K.; Song,B.M.; Kwon,Y.K.; Kim,H.R.; Choi,K.S.; Kim,J.Y.; Lee,H.J.; Moon,O.K.; Jeong,W.; Choi,J.; Baek,J.H.; Joo,Y.S.; Park,Y.H.; Lee,H.S.; Lee,Y.J.; Lee,Y. J.; Kang,H. M.; Lee,E. K.; Song,B. M.; Lee,K. J.; Hong,M. S.
EPI561602	NS	Korea,-Republic-of	2014-Jan-25	A/broiler-duck/Korea/H133/2014		Other Database Import	Jeong,J.; Kang,H.M.; Lee,E.K.; Song,B.M.; Kwon,Y.K.; Kim,H.R.; Choi,K.S.; Kim,J.Y.; Lee,H.J.; Moon,O.K.; Jeong,W.; Choi,J.; Baek,J.H.; Joo,Y.S.; Park,Y.H.; Lee,H.S.; Lee,Y.J.; Lee,Y. J.; Kang,H. M.; Lee,E. K.; Song,B. M.; Lee,K. J.; Hong,M. S.
EPI647491	NS	China	2014-Jul-01	A/chicken/Zhejiang/727031/2014		Other Database Import	Wu,H.; Peng,X.; Cheng,L.; Wu,N.
EPI681175	NS	China	2014-Jul-07	A/chicken/Zhejiang/77082/2014		Other Database Import	Wu,H.; Peng,X.; Cheng,L.; Lu,X.; Jin,C.; Xie,T.; Yao,H.; Wu,N.
EPI649318	NS	China	2014-Jul-07	A/duck/Zhejiang/77127/2014		Other Database Import	Wu,H.; Peng,X.; Cheng,L.; Lu,X.; Jin,C.; Xie,T.; Yao,H.; Wu,N.
EPI681397	NS	China	2014-Jul-07	A/goose/Zhejiang/77167/2014		Other Database Import	Wu,H.; Peng,X.; Cheng,L.; Lu,X.; Jin,C.; Xie,T.; Yao,H.; Wu,N.
EPI681168	NS	China	2014-Jul-07	A/pigeon/Zhejiang/77037/2014		Other Database Import	Wu,H.; Peng,X.; Cheng,L.; Lu,X.; Jin,C.; Xie,T.; Yao,H.; Wu,N.
EPI681412	NS	China	2014-Jul-27	A/chicken/Zhejiang/727155/2014		Other Database Import	Wu,H.; Peng,X.; Cheng,L.; Lu,X.; Jin,C.; Xie,T.; Yao,H.; Wu,N.
EPI681402	NS	China	2014-Jul-27	A/goose/Zhejiang/727092/2014		Other Database Import	Wu,H.; Peng,X.; Cheng,L.; Lu,X.; Jin,C.; Xie,T.; Yao,H.; Wu,N.
EPI681169	NS	China	2014-Jul-27	A/pigeon/Zhejiang/727044/2014		Other Database Import	Wu,H.; Peng,X.; Cheng,L.; Lu,X.; Jin,C.; Xie,T.; Yao,H.; Wu,N.
EPI585735	NS	China	2014-Jun-01	A/swan-goose/Jilin/JL01/2014		Other Database Import	Yu,Z.; Wang,T.; Gao,X.; Gao,Y.; Xia,X.
EPI593377	NS	China	2014-Jun-07	A/chicken/Jiangxi/17989/2014		Other Database Import	Lam,T.Y.; Zhou,B.; Wang,J.; Chai,Y.; Shen,Y.; Chen,X.; Ma,C.; Hong,W.; Chen,Y.; Zhang,Y.; Duan,L.; Chen,P.; Jiang,J.; Li,L.; Poon,L.M.; Webby,R.J.; Smith,D.K.; Leung,G.M.; Peiris,J.M.; Holmes,E.C.; Guan,Y.; Zhu,H.
EPI644480	NS	China	2014-Mar-01	A/chicken/Zhejiang/2C66/2014		Other Database Import	Wu,H.; Lu,R.; Wu,X.; Peng,X.; Xu,L.; Cheng,L.; Lu,X.; Jin,C.; Xie,T.; Yao,H.; Wu,N.
EPI592035	NS	China	2014-Mar-16	A/chicken/Jiangxi/12210/2014		Other Database Import	Lam,T.Y.; Zhou,B.; Wang,J.; Chai,Y.; Shen,Y.; Chen,X.; Ma,C.; Hong,W.; Chen,Y.; Zhang,Y.; Duan,L.; Chen,P.; Jiang,J.; Li,L.; Poon,L.M.; Webby,R.J.; Smith,D.K.; Leung,G.M.; Peiris,J.M.; Holmes,E.C.; Guan,Y.; Zhu,H.
EPI592049	NS	China	2014-Mar-16	A/chicken/Jiangxi/12221/2014		Other Database Import	Lam,T.Y.; Zhou,B.; Wang,J.; Chai,Y.; Shen,Y.; Chen,X.; Ma,C.; Hong,W.; Chen,Y.; Zhang,Y.; Duan,L.; Chen,P.; Jiang,J.; Li,L.; Poon,L.M.; Webby,R.J.; Smith,D.K.; Leung,G.M.; Peiris,J.M.; Holmes,E.C.; Guan,Y.; Zhu,H.
EPI592379	NS	China	2014-Mar-16	A/chicken/Jiangxi/12243/2014		Other Database Import	Lam,T.Y.; Zhou,B.; Wang,J.; Chai,Y.; Shen,Y.; Chen,X.; Ma,C.; Hong,W.; Chen,Y.; Zhang,Y.; Duan,L.; Chen,P.; Jiang,J.; Li,L.; Poon,L.M.; Webby,R.J.; Smith,D.K.; Leung,G.M.; Peiris,J.M.; Holmes,E.C.; Guan,Y.; Zhu,H.
EPI600215	NS	China	2014-Mar-30	A/chicken/Jiangxi/13202/2014		Other Database Import	Ma,C.; Lam,T.T.Y.; Chai,Y.; Wang,J.; Fan,X.; Hong,W.; Zhang,Y.; Li,L.; Liu,Y.; Smith,D.K.; Webby,R.J.; Peiris,J.S.M.; Zhu,H.; Guan,Y.
EPI602248	NS	China	2014-Mar-30	A/chicken/Jiangxi/13217/2014		Other Database Import	Ma,C.; Lam,T.T.Y.; Chai,Y.; Wang,J.; Fan,X.; Hong,W.; Zhang,Y.; Li,L.; Liu,Y.; Smith,D.K.; Webby,R.J.; Peiris,J.S.M.; Zhu,H.; Guan,Y.
EPI592140	NS	China	2014-Mar-30	A/chicken/Jiangxi/13230/2014		Other Database Import	Lam,T.Y.; Zhou,B.; Wang,J.; Chai,Y.; Shen,Y.; Chen,X.; Ma,C.; Hong,W.; Chen,Y.; Zhang,Y.; Duan,L.; Chen,P.; Jiang,J.; Li,L.; Poon,L.M.; Webby,R.J.; Smith,D.K.; Leung,G.M.; Peiris,J.M.; Holmes,E.C.; Guan,Y.; Zhu,H.
EPI602276	NS	China	2014-Mar-30	A/chicken/Jiangxi/13238/2014		Other Database Import	Ma,C.; Lam,T.T.Y.; Chai,Y.; Wang,J.; Fan,X.; Hong,W.; Zhang,Y.; Li,L.; Liu,Y.; Smith,D.K.; Webby,R.J.; Peiris,J.S.M.; Zhu,H.; Guan,Y.
EPI602217	NS	China	2014-Mar-30	A/chicken/Jiangxi/13249/2014		Other Database Import	Ma,C.; Lam,T.T.Y.; Chai,Y.; Wang,J.; Fan,X.; Hong,W.; Zhang,Y.; Li,L.; Liu,Y.; Smith,D.K.; Webby,R.J.; Peiris,J.S.M.; Zhu,H.; Guan,Y.
EPI602164	NS	China	2014-Mar-30	A/chicken/Jiangxi/13274/2014		Other Database Import	Ma,C.; Lam,T.T.Y.; Chai,Y.; Wang,J.; Fan,X.; Hong,W.; Zhang,Y.; Li,L.; Liu,Y.; Smith,D.K.; Webby,R.J.; Peiris,J.S.M.; Zhu,H.; Guan,Y.
EPI964988	NS	Bangladesh	2014-Nov-16	A/duck/Bangladesh/23858/2014		Other Database Import	Marinova Petkova,A.; Shanmuganatham,K.; Feeroz,M.M.; Jones Engel,L.; Hasan,M.K.; Akhtar,S.; Turner,J.; Walker,D.; Seiler,P.; Franks,J.; McKenzie,P.; Krauss,S.; Webby,R.J.; Webster,R.G.; Hasan,K.; Seiler,J.
EPI1061227	NS	China	2014-Nov-20	A/goose/Zhejiang/1120078/2014		Other Database Import	Wu,H.; Lu,R.; Peng,X.; Liu,F.; Cheng,L.; Wu,N.
EPI1061229	NS	China	2014-Nov-20	A/goose/Zhejiang/1120084/2014		Other Database Import	Wu,H.; Lu,R.; Peng,X.; Liu,F.; Cheng,L.; Wu,N.
EPI681389	NS	China	2014-Nov-20	A/goose/Zhejiang/112071/2014		Other Database Import	Wu,H.; Peng,X.; Cheng,L.; Lu,X.; Jin,C.; Xie,T.; Yao,H.; Wu,N.
EPI580279	NS	China	2014-Nov-30	A/Chicken/Guangdong/DG479/2014	South China Agricultural University	South China Agricultural University	Shumin,Xie;Weixin,Jia;Yicun,Lin;Kaixiang,Xing;Xingxing,Ren;Wenbao,Qi;Ming,Liao
EPI736695	NS	China	2014-Oct-12	A/duck/Guizhou/013/2014		Other Database Import	Duan,Z.; Chen,J.; Ji,X.; Xu,H.; Ruan,Y.; Zhao,J.
EPI596534	NS	Vietnam	2014-Oct-13	A/duck/Vietnam/LBM758/2014		Other Database Import	Soda,K.; Hotta,K.; Trang,H.U.; Le,Q.M.; Yamashiro,T.; Ito,T.
EPI596521	NS	Vietnam	2014-Oct-13	A/muscovy-duck/Vietnam/LBM754/2014		Other Database Import	Soda,K.; Hotta,K.; Trang,H.U.; Le,Q.M.; Yamashiro,T.; Ito,T.
EPI839151	NS	China	2014-Sep-08	A/Gallinula-chloropus/Guangdong/GZ174/2014		Other Database Import	Kang,Y.; Feng,M.; Ren,T.
EPI681183	NS	China	2014-Sep-25	A/chicken/Zhejiang/925134/2014		Other Database Import	Wu,H.; Peng,X.; Cheng,L.; Lu,X.; Jin,C.; Xie,T.; Yao,H.; Wu,N.
EPI681406	NS	China	2014-Sep-25	A/goose/Zhejiang/925106/2014		Other Database Import	Wu,H.; Peng,X.; Cheng,L.; Lu,X.; Jin,C.; Xie,T.; Yao,H.; Wu,N.
EPI760217	NS	China	2015-Apr-06	A/duck/Hunan/161/2015		Other Database Import	Li,X.; Yang,J.; Liu,B.; Jia,Y.; Guo,J.; Gao,X.; Weng,S.; Yang,M.; Wang,L.; Wang,L.F.; Cui,J.; Chen,H.; Zhu,Q.
EPI1060787	NS	Hong-Kong-(SAR)	2015-Apr-30	A/oriental-magpie-robin/HK/6154/2015		Other Database Import	Hui,P.Y.; Chan,L.Y.; Kuok,I.T.; Mok,K.P.; Yang,Z.; Li,R.; Luk,S.M.; Lee,F.; Yen,H.L.; Zhu,H.; Guan,Y.; Nicholls,J.; Peiris,M.; Chan,C.W.
EPI965418	NS	Bangladesh	2015-Aug-25	A/quail/Bangladesh/25987/2015		Other Database Import	Barman,S.; Marinova Petkova,A.; Hasan,M.K.; Akhtar,S.; Turner,J.C.; Franks,J.; Walker,D.; Seiler,P.; Friedman,K.; Kercher,L.; Kayali,G.; Jones Engel,L.; McKenzie,P.; Krauss,S.; Webby,R.J.; Feeroz,M.M.; Webster,R.G.
EPI693710	NS	Mongolia	2015-Aug-30	A/duck/Mongolia/83/2015		Other Database Import	Matsuno,K.; Okamatsu,M.; Kida,H.; Sakoda,Y.; Matuno,K.; Hatamachi,J.
EPI895236	NS	China	2015-Dec-12	A/chicken/Ganzhou/GZ27/2015		Other Database Import	Chen,L.J.; Tian,J.H.; Lin,X.D.; Liao,Y.; Shi,M.; Zhang,Y.Z.
EPI683111	NS	China	2015	A/chicken/Wenzhou/RAQL01/2015		Other Database Import	Chen,L. J.; Lin,X. D.; Guo,W. P.; Tian,J. H.; Zhang,Y. Z.
EPI683097	NS	China	2015	A/turtledove/Wuhan/HKBJ43/2015		Other Database Import	Chen,L. J.; Lin,X. D.; Guo,W. P.; Tian,J. H.; Zhang,Y. Z.
EPI775085	NS	Vietnam	2015-Jan-06	A/duck/CaMau/0237/2015		Other Database Import	Cao,B.V.; Le Ha,T.D.; Mai,V.N.; Dang Trinh,M.A.; Le Phan,K.N.; Vo Tran,N.T.; Hoang,T.
EPI775093	NS	Vietnam	2015-Jan-06	A/duck/CaMau/0238/2015		Other Database Import	Cao,B.V.; Le Ha,T.D.; Mai,V.N.; Dang Trinh,M.A.; Le Phan,K.N.; Vo Tran,N.T.; Hoang,T.
EPI590553	NS	Taiwan	2015-Jan-15	A/chicken/PT/a158/2015		Other Database Import	Cheng,M. C.; Tan,D. H.; Chen,L. H.; Liu,Y. P.; Lin,Y. J.; Tsai,H. J.; Chang,P. C.
EPI690548	NS	Taiwan	2015-Jan-17	A/goose/Taiwan/TNC4/2015		Other Database Import	Huang,P.Y.; Lee,C.D.; Yip,C.H.; Cheung,C.L.; Yu,G.; Lam,T.T.; Smith,D.K.; Zhu,H.; Guan,Y.; Lee,C.C.; Lam,T.Y.
EPI690724	NS	Taiwan	2015-Jan-17	A/goose/Taiwan/TNO12/2015		Other Database Import	Huang,P.Y.; Lee,C.D.; Yip,C.H.; Cheung,C.L.; Yu,G.; Lam,T.T.; Smith,D.K.; Zhu,H.; Guan,Y.; Lee,C.C.; Lam,T.Y.
EPI946794	NS	Japan	2015-Jul-07	A/chicken/Japan/AQ-HE61/2015		Other Database Import	Shibata,A.; Hiono,T.; Okamatsu,M.; Osaka,H.; Sakoda,Y.
EPI965422	NS	Bangladesh	2015-Jul-10	A/duck/Bangladesh/25891/2015		Other Database Import	Barman,S.; Marinova Petkova,A.; Hasan,M.K.; Akhtar,S.; Turner,J.C.; Franks,J.; Walker,D.; Seiler,P.; Friedman,K.; Kercher,L.; Kayali,G.; Jones Engel,L.; McKenzie,P.; Krauss,S.; Webby,R.J.; Feeroz,M.M.; Webster,R.G.
EPI729790	NS	China	2015-May-01	A/chicken/Shanghai/06/2015		Other Database Import	Ge,F.
EPI641388	NS	China	2015-May-05	A/chicken/Shandong/1167/2015		Other Database Import	Tan,L.; Xu,C.T.; Zhao,X.; Huang,Q.; Huang,Y.; Zhu,F.; Gao,D.; Zhang,L.; Yang,S.; Zhang,X.
EPI753572	NS	China	2015-May-14	A/chicken/Zhejiang/514132/2015		Other Database Import	Wu,H.; Lu,R.; Peng,X.; Cheng,L.; Jin,C.; Lu,X.; Xie,T.; Yao,H.; Wu,N.
EPI895235	NS	China	2016-Feb-19	A/chicken/Taishun/TS2/2016		Other Database Import	Chen,L.J.; Tian,J.H.; Lin,X.D.; Liao,Y.; Shi,M.; Zhang,Y.Z.
